# Supplementary material for: Cellular Responses Induced by NCT-503 Treatment on Triple-Negative Breast Cancer Cell Lines: A Proteomics Approach
Source: MDPI journal article supplement (doi:10.3390/biomedicines12051087), 2024-05-14
Supplement: s1 [file s1]

A

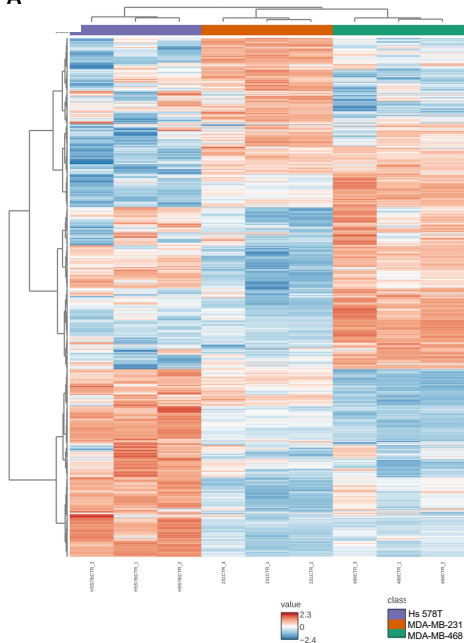

B

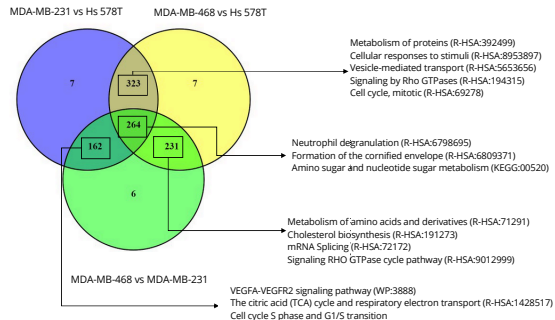

C

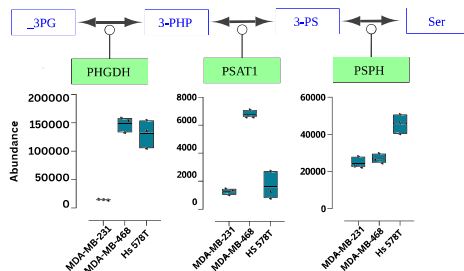

**Figure S1.** Heterogeneity of untreated TNBC cell line through proteome profiling A. Heatmap of hierarchical clustering analysis performed on protein profiles of TNBC cell panel; Hierarchical clustering was performed on normalized data using Euclidean distance measurement and WARD clustering method option; B. Venn diagram depicting proteins differentiating between cell lines and their involvement in metabolic pathways. Differentially expressed proteins were obtained using ANOVA test (corrected p-value threshold of 0.05) + Tukey's HSD post-hoc test; C. Proteins involved in de novo serine biosynthesis pathway and their expression in TNBC cell panel.

## A Overview of intracellular proteome profiling

| Intracellular proteome   | MDA-MB-231 | MDA-MB-468 | Hs 578T |
|--------------------------|------------|------------|---------|
| Total no. of proteins    | 2123       | 1739       | 1505    |
| Reverse+                 | 84         | 67         | 51      |
| FDR dataset %            | 3.95       | 3.85       | 3.39    |
| Final number of proteins | 2013       | 1670       | 1452    |

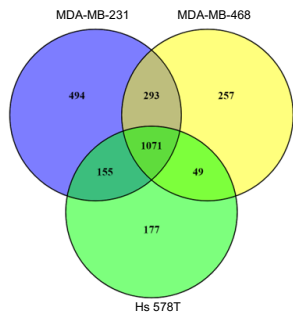

## B Functional analysis using GO ontologies

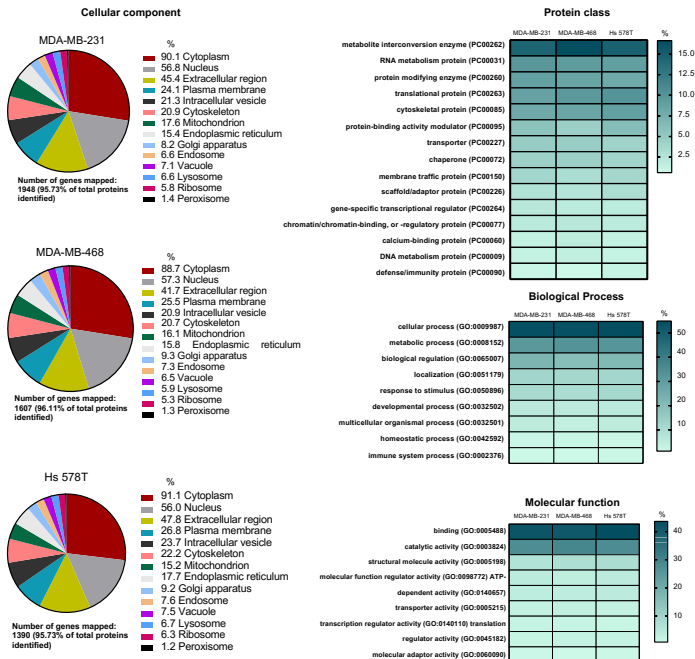

**Figure S2.** Overview of intracellular proteome profiles: A. Overview of the number of identified proteins and Venn diagram showing common and cell line particular proteins; B. Functional analysis using GO ontologies: cellular component- CC; biological process - BP and molecular function -MF;

## A Overview of secreted proteome profiling

| Secretome                | MDA-MB-231 | MDA-MB-468 | Hs 578T |
|--------------------------|------------|------------|---------|
| Total no proteins        | 112        | 250        | 441     |
| Reverse+                 | 3          | 6          | 10      |
| FDR dataset %            | 2.61       | 2.40       | 2.32    |
| Final number of proteins | 108        | 243        | 426     |

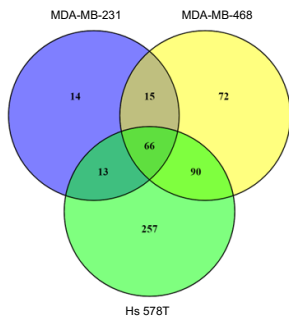

## B Functional analysis using GO ontologies

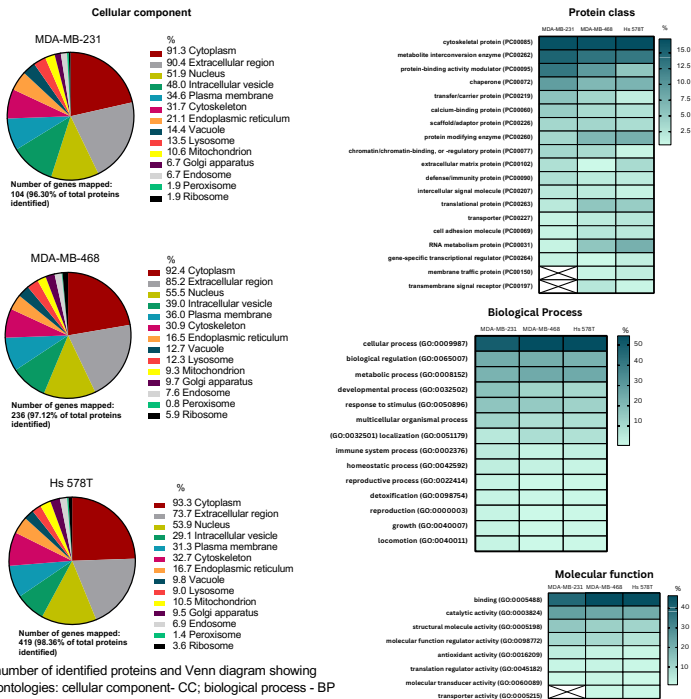

**Figure S3.** Overview of the secreted proteins profiles: A. Overview of the number of identified proteins and Venn diagram showing common and cell line particular proteins; B. Functional analysis using GO ontologies: cellular component- CC; biological process - BP and molecular function -MF;

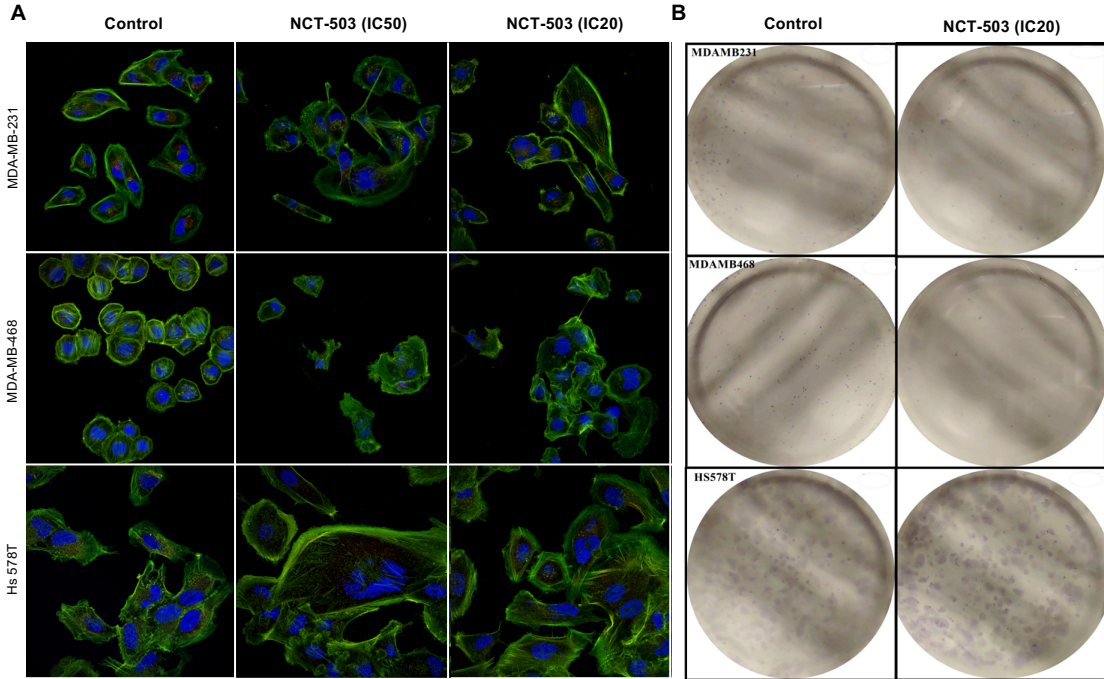

**Figure S4.** NCT-503 treatment impact on cellular properties of TNBC cell panel A. Impact of NCT-503 treatment on cell morphology at IC50 and IC20 dose, respectively for each TNBC cell line; blue- cell nucleus, green- cytoskeleton morphology; B. Effect of NCT 503 treatment on colony formation abilities of TNBC cell line panel



A

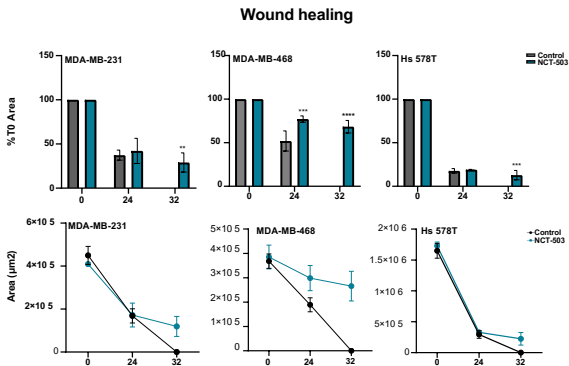

B

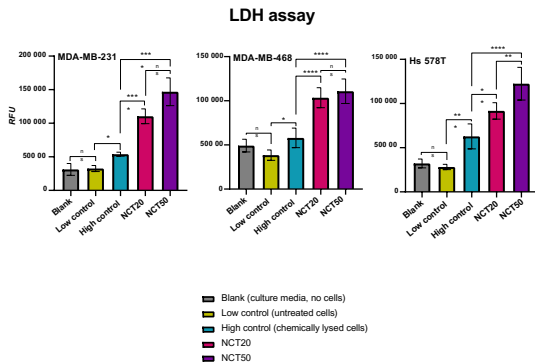

**Figure S5** In vitro assays of NCT-503 treatment impact on TNBC cell lines. A. wound healing assay; B. Culture media release LDH assay

## MDA-MB-231 intracellular DEPs

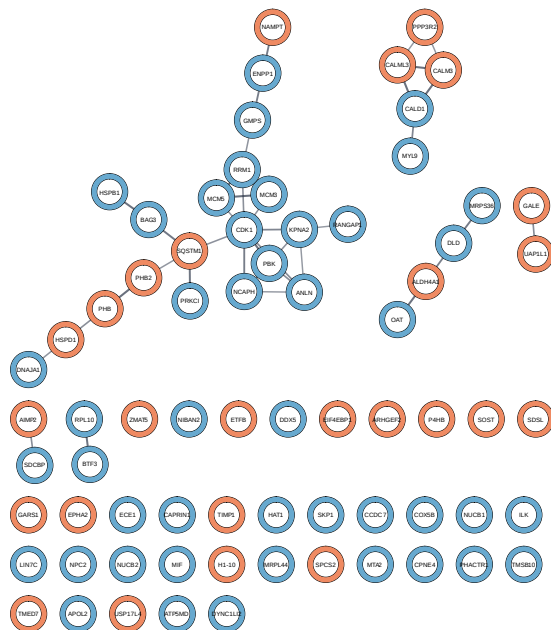

## MDA-MB-231 secreted DEPs

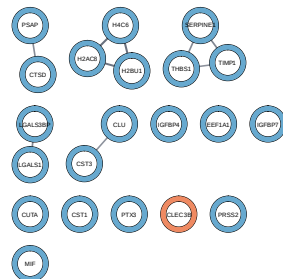

## STRING App

Full string network retrieval; confidence cutoff: 0.7, no additional interactors

### MDA-MB-231 intracellular DEPs

**Network Stats**  
 number of nodes: 71  
 number of edges: 39  
 average node degree: 1.1  
 avg. local clustering coefficient: 0.319  
 expected number of edges: 20  
**PPI enrichment p-value: 1.20e-04**

### MDA-MB-231 secreted DEPs

**Network Stats**  
 number of nodes: 21  
 number of edges: 9  
 average node degree: 0.857  
 avg. local clustering coefficient: 0.571  
 expected number of edges: 2  
**PPI enrichment p-value: 5.18e-05**

## Legend

Highest condition: Control (CTR) NCT-503

**Figure S6.** Protein-protein interaction (PPI) network retrieved using StringApp for DEPs induced by NCT-503 treatment in MDA-MB-231 cell line

## MDA-MB-468 intracellular DEPs

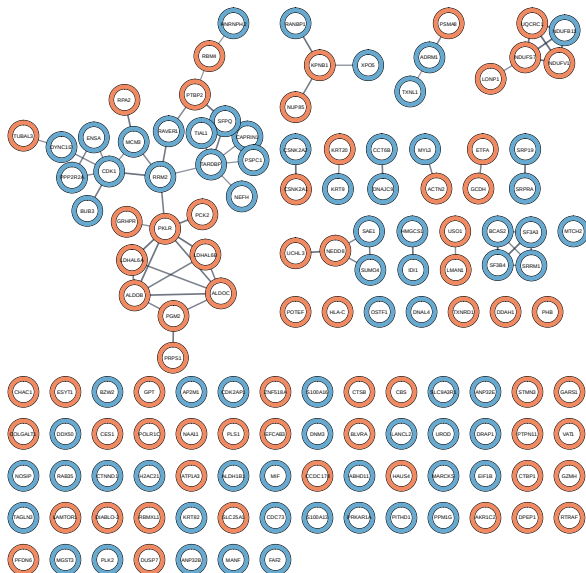

## MDA-MB-468 secreted DEPs

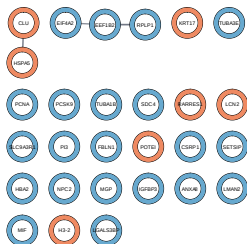

### STRING App

Full string network retrieval; confidence cutoff: 0.7, no additional interactors

#### MDA-MB-468 intracellular DEPs

**Network Stats**  
 number of nodes: 135  
 number of edges: 68  
 average node degree: 1.01  
 avg. local clustering coefficient: 0.375  
 expected number of edges: 38  
**PPI enrichment p-value: 1.03e-05**

#### MDA-MB-468 secreted DEPs

**Network Stats**  
 number of nodes: 28  
 number of edges: 3  
 average node degree: 0.214  
 avg. local clustering coefficient: 0.143  
 expected number of edges: 2  
**PPI enrichment p-value: 0.371**

### Legend

Highest condition:  Control (CTR)  NCT-503

**Figure S7.** Protein-protein interaction (PPI) network retrieved using StringApp for DEPs induced by NCT-503 treatment in MDA-MB-468 cell line

## Hs 578T intracellular DEPs

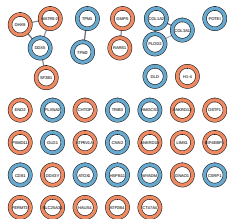

### STRING App

Full string network retrieval; confidence cutoff: 0.7, no additional interactors

#### Hs 578T intracellular DEPs

##### Network Stats

number of nodes: 40  
number of edges: 9  
average node degree: 0.45  
avg. local clustering coefficient: 0.258  
expected number of edges: 3  
PPI enrichment p-value: 0.00466

#### Hs 578T secreted DEPs

##### Network Stats

number of nodes: 207  
number of edges: 481  
average node degree: 4.65  
avg. local clustering coefficient: 0.465  
expected number of edges: 162  
PPI enrichment p-value: < 1.0e-16

### Legend

Highest condition:  Control (CTR)  NCT-503

## Hs 578T secreted DEPs

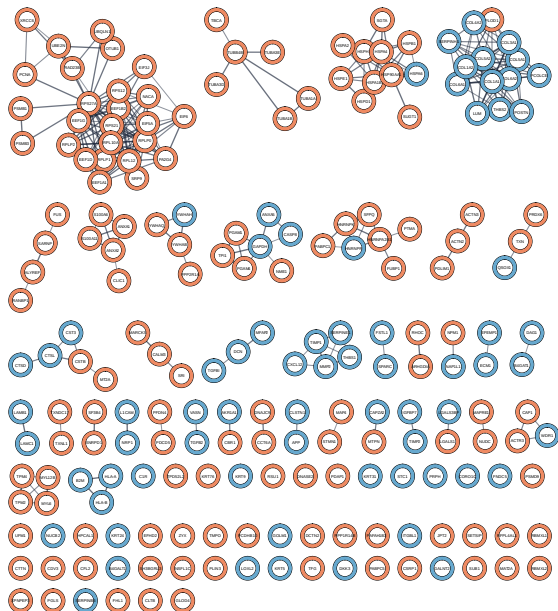

**Figure S8.** Protein-protein interaction (PPI) network retrieved using StringApp for DEPs induced by NCT-503 treatment in Hs 578T cell line

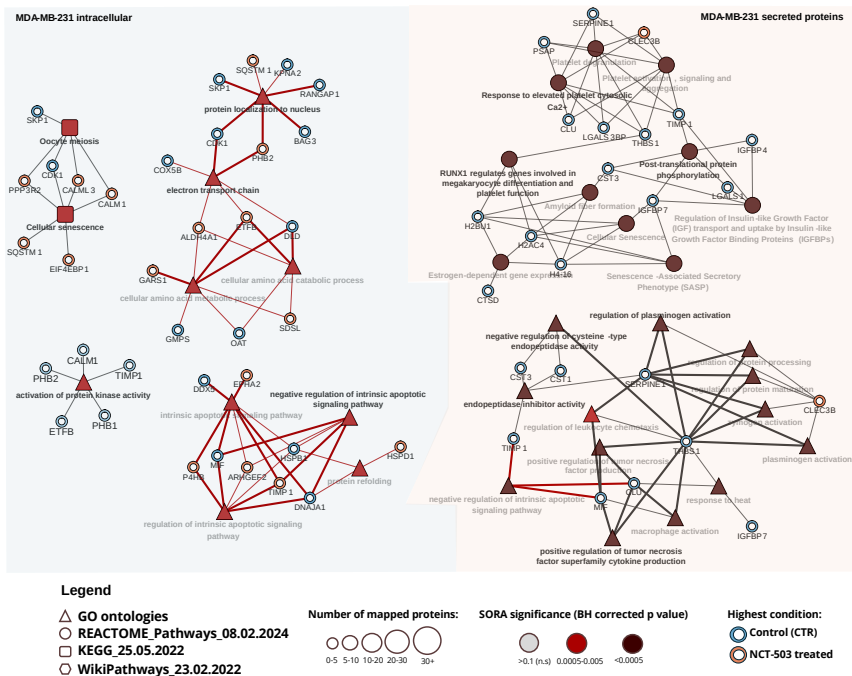

**Figure S9.** Enrichment analysis of MDA-MB-231 DEPs using ClueGO Enrichment tool

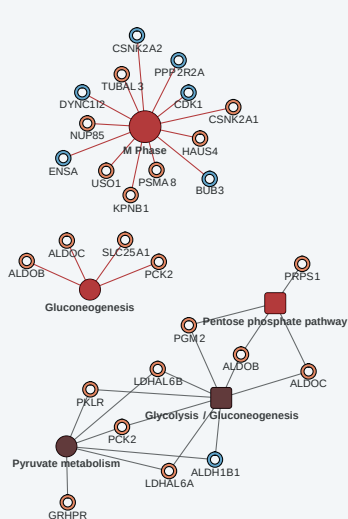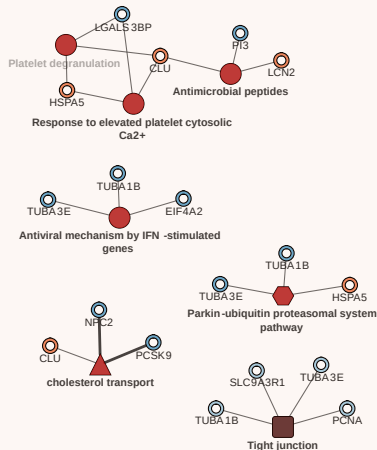

### Legend

- △ GO ontologies
- REACTOME\_Pathways\_08.02.2024
- KEGG\_25.05.2022
- WikiPathways\_23.02.2022

Number of mapped proteins:

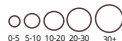

SORA significance (BH corrected p value)

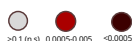

Highest condition:

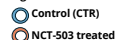

**Figure S10.** Enrichment analysis of MDA-MB-468 DEPs using ClueGO Enrichment tool

## Hs 578T intracellular

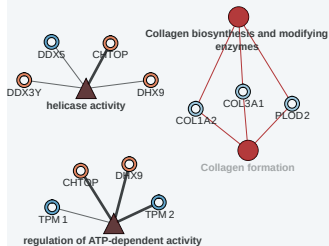

## Hs 578T secreted proteins

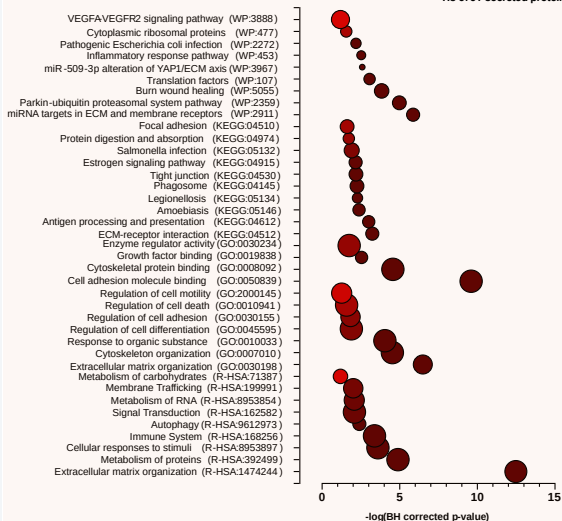

## Legend

- △ GO ontologies
- REACTOME\_Pathways\_08.02.2024
- KEGG\_25.05.2022
- WikiPathways\_23.02.2022

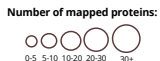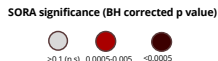

- Highest condition:
- Control (CTR)
  - NCT-503 treated

**Figure S11.** Enrichment analysis of Hs 578T DEPs using ClueGO Enrichment tool

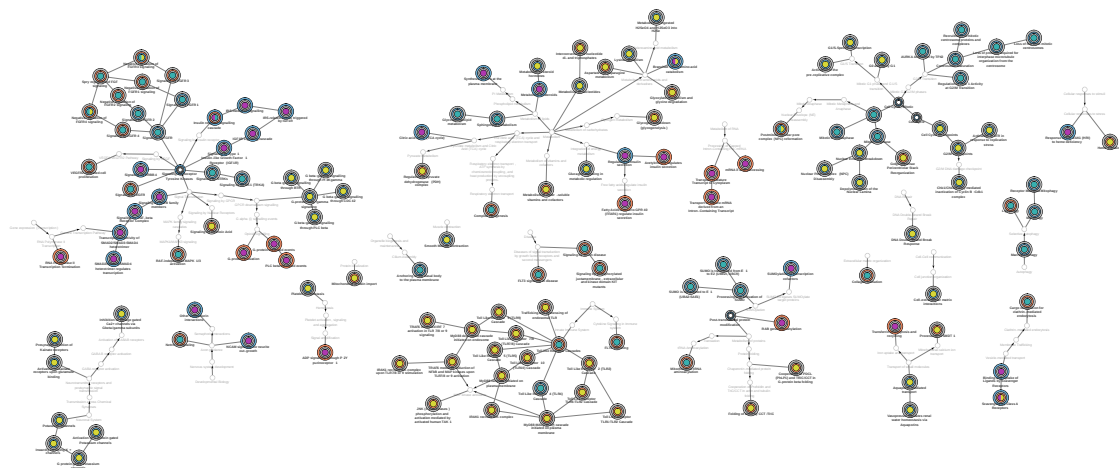

# **Legend:**

## **Rings (inner to outer):**

direction GSEA MDA-MB-231

direction GSEA MDA-MB-468

direction GSEA Hs 578T

Significant Down Significant Up

Not significant

MDA-MB-231

MDA-MB-468

Hs 578T

**Figure S12.** Network representation of Reactome GSEA pathways for the intracellular proteome of TNBC cell lines treated with NCT-503







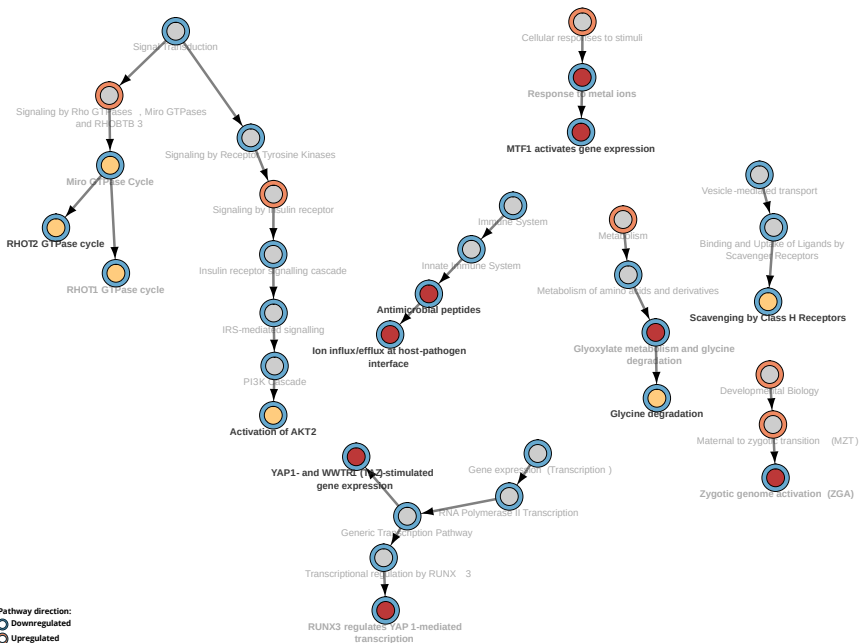

# **ReactomeGSEA analysis:** Hs 578T intracellular proteins

**Legend:**

**Pathway significance (BH corrected p-value)**

>0.1 (n.s) 0.05-0.005 0.005-0.0005 <0.0005

**Pathway direction:**

Downregulated Upregulated

**Figure S15.** Network representation of ReactomeGSEA analysis performed on the intracellular protein profiles of NCT-503 treatment and control group of Hs 578T



## ReactomeGSEA analysis: MDA-MB-231 secreted proteins

### Legend:

Pathway significance (BH corrected p-value)

● >0.1(n.s) 
 ● 0.05-0.005 
 ● 0.005-0.0005 
 ● <0.0005

Pathway direction:

○ Downregulated  
○ Upregulated

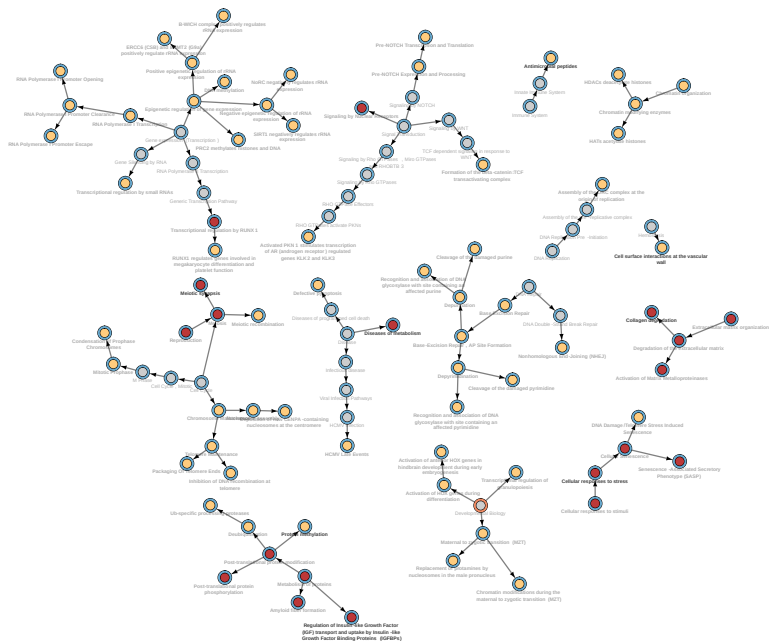

**Figure S17.** Network representation of ReactomeGSEA analysis performed on the secreted protein profiles of NCT-503 treatment and control group of MDA-MB-231

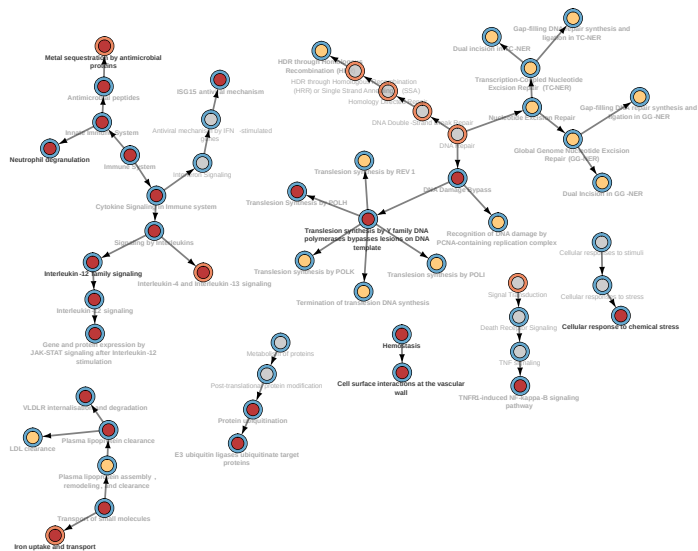

# **ReactomeGSEA analysis:** MDA-MB-468 secreted proteins

## **Legend:**

Pathway significance (BH corrected p-value)

● >0.1 (n.s.) ● 0.05-0.005 ● 0.005-0.0005 ● <0.0005

Pathway direction:

● Downregulated ● Upregulated

**Figure S18.** Network representation of ReactomeGSEA analysis performed on the secreted protein profiles of NCT-503 treatment and control group of MDA-MB-468
