# Supplementary material for: Cellular Responses Induced by NCT-503 Treatment on Triple-Negative Breast Cancer Cell Lines: A Proteomics Approach
Source: Biomedicines. 2024 May 14;12(5):1087. doi: 10.3390/biomedicines12051087 (PMC11117597; doi:10.3390/biomedicines12051087)
Supplement: Supplementary file 1 [file biomedicines-12-01087-s001.zip › Suppplementary Tabels S1-S13.xlsx]

## Sheet: Description
	Table S1	Significant differently expressed proteins in untreated TNBC cell panel
	Table S2	Intracellular DEPs after NCT-503 treatment at IC20
	Table S3	Secreted differentially expressed proteins (DEPs) after NCT-503 treatment at IC20
	Table S4	ClueGO Enrichment analysis results of identified DEPs after NCT-503 treatment
	Table S5	Gprofiler and String Enrichment analysis results of identified DEPs after NCT-503 treatment
	Table S6	EnrichR Enrichment analysis results of identified DEPs after NCT-503 treatment
	Table S7	Reactome GSEA analysis results of intracellular proteome profiles of NCT-503 vs CTR groups of MDAMB231 cell line
	Table S8	Reactome GSEA analysis results of secreted proteome profiles of NCT-503 vs CTR groups of MDAMB231 cell line
	Table S9	Reactome GSEA analysis results of intracellular proteome profiles of NCT-503 vs CTR groups of MDAMB468 cell line
	Table S10	Reactome GSEA analysis results of secreted proteome profiles of NCT-503 vs CTR groups of MDAMB468 cell line
	Table S11	Reactome GSEA analysis results of intracellular proteome profiles of NCT-503 vs CTR groups of Hs 578T cell line
	Table S12	Reactome GSEA analysis results of secreted proteome profiles of NCT-503 vs CTR groups of Hs 578T cell line
	Table S13	Druggable proteins induced by NCT-503 treatment in TNBC cell lines

## Sheet: Table S1
Table S1 Significant differently expressed proteins in untreated TNBC cell panel							ANOVA + Tukey's HSD
Accession	Peptide count	Max fold change	Highest mean condition	Lowest mean condition	Description	GeneID	f.value	p.value	FDR	Tukey's HSD (top 1000)
P35610	5	3.28647	MDAMB231 CTR	Hs 578T CTR	Sterol O-acyltransferase 1	SOAT1	16.359	0.0037216	0.0093497	MDAMB231-HS578t
Q9BPX3	3	1.58074	MDAMB231 CTR	Hs 578T CTR	Condensin complex subunit 3	NCAPG	15.394	0.0043384	0.010502	MDAMB231-HS578t
Q15369	7	2.41062	MDAMB231 CTR	Hs 578T CTR	Elongin-C	ELOC	15.263	0.0044326	0.010674	MDAMB231-HS578t
Q92544	1	5.68629	Hs 578T CTR	MDAMB231 CTR	Transmembrane 9 superfamily member 4	TM9SF4	15.248	0.0044432	0.010677	MDAMB231-HS578t
Q14004	4	1.88379	MDAMB231 CTR	Hs 578T CTR	Cyclin-dependent kinase 13	CDK13	15.205	0.0044747	0.010728	MDAMB231-HS578t
P45974	16	1.6171	MDAMB231 CTR	Hs 578T CTR	Ubiquitin carboxyl-terminal hydrolase 5	USP5	14.389	0.005135	0.011833	MDAMB231-HS578t
P22234	23	1.83829	MDAMB231 CTR	Hs 578T CTR	Multifunctional protein ADE2	PAICS	14.128	0.0053735	0.012196	MDAMB231-HS578t
P07951	3	8.63443	Hs 578T CTR	MDAMB231 CTR	Tropomyosin beta chain	TPM2	377.77	4.8906e-07	8.0578e-05	MDAMB231-HS578t; MDAMB468-HS578t
Q6IBS0	9	4.81862	Hs 578T CTR	MDAMB468 CTR	Twinfilin-2	TWF2	377.02	4.9198e-07	8.0578e-05	MDAMB231-HS578t; MDAMB468-HS578t
Q05682	21	7.90937	Hs 578T CTR	MDAMB468 CTR	Caldesmon	CALD1	249.58	1.6757e-06	0.00012366	MDAMB231-HS578t; MDAMB468-HS578t
P10768	12	2.43494	Hs 578T CTR	MDAMB468 CTR	S-formylglutathione hydrolase	ESD	240.8	1.8631e-06	0.00012729	MDAMB231-HS578t; MDAMB468-HS578t
P50454	22	6.90601	Hs 578T CTR	MDAMB468 CTR	Serpin H1	SERPINH1	233.75	2.0346e-06	0.0001275	MDAMB231-HS578t; MDAMB468-HS578t
A7E2Y1	9	3.56141	Hs 578T CTR	MDAMB468 CTR	Myosin-7B	MYH7B	197.82	3.3338e-06	0.0001396	MDAMB231-HS578t; MDAMB468-HS578t
P25685	9	2.65804	MDAMB231 CTR	Hs 578T CTR	DnaJ homolog subfamily B member 1	DNAJB1	197.52	3.349e-06	0.0001396	MDAMB231-HS578t; MDAMB468-HS578t
O60568	11	1.58485	Hs 578T CTR	MDAMB468 CTR	Multifunctional procollagen lysine hydroxylase and glycosyltransferase LH3	PLOD3	196.45	3.403e-06	0.0001396	MDAMB231-HS578t; MDAMB468-HS578t
P12429	19	2.86547	MDAMB231 CTR	Hs 578T CTR	Annexin A3	ANXA3	178.39	4.5243e-06	0.00016462	MDAMB231-HS578t; MDAMB468-HS578t
P55145	7	2.16739	Hs 578T CTR	MDAMB231 CTR	Mesencephalic astrocyte-derived neurotrophic factor	MANF	156.13	6.7008e-06	0.00020708	MDAMB231-HS578t; MDAMB468-HS578t
Q08945	23	1.95673	Hs 578T CTR	MDAMB468 CTR	FACT complex subunit SSRP1	SSRP1	151.46	7.3273e-06	0.0002173	MDAMB231-HS578t; MDAMB468-HS578t
P21291	4	3.15084	Hs 578T CTR	MDAMB231 CTR	Cysteine and glycine-rich protein 1	CSRP1	150.73	7.4313e-06	0.0002173	MDAMB231-HS578t; MDAMB468-HS578t
Q9Y3B3	5	3.37274	Hs 578T CTR	MDAMB468 CTR	Transmembrane emp24 domain-containing protein 7	TMED7	144.94	8.3382e-06	0.00022486	MDAMB231-HS578t; MDAMB468-HS578t
P35232	19	1.71599	MDAMB231 CTR	Hs 578T CTR	Prohibitin	PHB	137.82	9.6689e-06	0.00023358	MDAMB231-HS578t; MDAMB468-HS578t
Q9NZN4	21	4.46914	Hs 578T CTR	MDAMB468 CTR	EH domain-containing protein 2	EHD2	137.56	9.723e-06	0.00023358	MDAMB231-HS578t; MDAMB468-HS578t
P18206	54	2.42134	Hs 578T CTR	MDAMB468 CTR	Vinculin	VCL	133.66	1.0579e-05	0.00023861	MDAMB231-HS578t; MDAMB468-HS578t
P09486	4	22.3917	Hs 578T CTR	MDAMB231 CTR	SPARC	SPARC	132.68	1.081e-05	0.00023861	MDAMB231-HS578t; MDAMB468-HS578t
P01889	7	3.00406	Hs 578T CTR	MDAMB468 CTR	HLA class I histocompatibility antigen_ B alpha chain	HLA-B	129.24	1.1676e-05	0.00024259	MDAMB231-HS578t; MDAMB468-HS578t
P17812	12	1.63052	MDAMB468 CTR	Hs 578T CTR	CTP synthase 1	CTPS1	128.77	1.18e-05	0.00024259	MDAMB231-HS578t; MDAMB468-HS578t
P43686	19	2.14019	Hs 578T CTR	MDAMB231 CTR	26S proteasome regulatory subunit 6B	PSMC4	113.33	1.7152e-05	0.00031483	MDAMB231-HS578t; MDAMB468-HS578t
Q96AY3	9	6.02929	Hs 578T CTR	MDAMB231 CTR	Peptidyl-prolyl cis-trans isomerase FKBP10	FKBP10	109.73	1.8848e-05	0.00034017	MDAMB231-HS578t; MDAMB468-HS578t
Q9UDY6	4	3.06037	Hs 578T CTR	MDAMB231 CTR	Tripartite motif-containing protein 10	TRIM10	106.16	2.076e-05	0.00036589	MDAMB231-HS578t; MDAMB468-HS578t
Q07065	30	2.92632	Hs 578T CTR	MDAMB468 CTR	Cytoskeleton-associated protein 4	CKAP4	103.89	2.2111e-05	0.00038078	MDAMB231-HS578t; MDAMB468-HS578t
P35080	5	16.3599	Hs 578T CTR	MDAMB231 CTR	Profilin-2	PFN2	99.668	2.4949e-05	0.00040974	MDAMB231-HS578t; MDAMB468-HS578t
P07237	39	3.23654	Hs 578T CTR	MDAMB468 CTR	Protein disulfide-isomerase	P4HB	98.811	2.5585e-05	0.00041228	MDAMB231-HS578t; MDAMB468-HS578t
P04216	4	10.3979	Hs 578T CTR	MDAMB468 CTR	Thy-1 membrane glycoprotein	THY1	95.673	2.8104e-05	0.00043127	MDAMB231-HS578t; MDAMB468-HS578t
O94979	9	2.40261	Hs 578T CTR	MDAMB468 CTR	Protein transport protein Sec31A	SEC31A	95.368	2.8367e-05	0.00043127	MDAMB231-HS578t; MDAMB468-HS578t
P67936	20	2.41653	Hs 578T CTR	MDAMB231 CTR	Tropomyosin alpha-4 chain	TPM4	95.233	2.8484e-05	0.00043127	MDAMB231-HS578t; MDAMB468-HS578t
P54368	3	3.31467	Hs 578T CTR	MDAMB231 CTR	Ornithine decarboxylase antizyme 1	OAZ1	90.093	3.3467e-05	0.00047582	MDAMB231-HS578t; MDAMB468-HS578t
Q9UNH7	4	2.22317	Hs 578T CTR	MDAMB468 CTR	Sorting nexin-6	SNX6	89.701	3.3893e-05	0.00047582	MDAMB231-HS578t; MDAMB468-HS578t
P50570	20	2.66693	Hs 578T CTR	MDAMB231 CTR	Dynamin-2	DNM2	89.623	3.3979e-05	0.00047582	MDAMB231-HS578t; MDAMB468-HS578t
O75368	2	6.40907	Hs 578T CTR	MDAMB468 CTR	SH3 domain-binding glutamic acid-rich-like protein	SH3BGRL	89.452	3.4168e-05	0.00047582	MDAMB231-HS578t; MDAMB468-HS578t
Q9Y6N7	3	3.98538	Hs 578T CTR	MDAMB231 CTR	Roundabout homolog 1	ROBO1	87.2	3.6791e-05	0.00048061	MDAMB231-HS578t; MDAMB468-HS578t
P08133	44	3.03964	Hs 578T CTR	MDAMB468 CTR	Annexin A6	ANXA6	85.048	3.9556e-05	0.00049631	MDAMB231-HS578t; MDAMB468-HS578t
P61224	6	2.25125	Hs 578T CTR	MDAMB468 CTR	Ras-related protein Rap-1b	RAP1B	84.617	4.0143e-05	0.00050034	MDAMB231-HS578t; MDAMB468-HS578t
Q15717	11	3.76515	Hs 578T CTR	MDAMB468 CTR	ELAV-like protein 1	ELAVL1	83.326	4.197e-05	0.0005174	MDAMB231-HS578t; MDAMB468-HS578t
P13667	25	2.00446	Hs 578T CTR	MDAMB231 CTR	Protein disulfide-isomerase A4	PDIA4	80.678	4.6083e-05	0.00053867	MDAMB231-HS578t; MDAMB468-HS578t
Q9BY44	18	3.37967	Hs 578T CTR	MDAMB231 CTR	Eukaryotic translation initiation factor 2A	EIF2A	80.286	4.6735e-05	0.00054347	MDAMB231-HS578t; MDAMB468-HS578t
Q13561	15	1.86281	Hs 578T CTR	MDAMB468 CTR	Dynactin subunit 2	DCTN2	78.332	5.0185e-05	0.0005806	MDAMB231-HS578t; MDAMB468-HS578t
Q13509	8	2.78504	Hs 578T CTR	MDAMB468 CTR	Tubulin beta-3 chain	TUBB3	77.781	5.122e-05	0.00058768	MDAMB231-HS578t; MDAMB468-HS578t
P52566	7	3.84166	MDAMB231 CTR	Hs 578T CTR	Rho GDP-dissociation inhibitor 2	ARHGDIB	76.724	5.3284e-05	0.00060406	MDAMB231-HS578t; MDAMB468-HS578t
P56192	27	1.64853	Hs 578T CTR	MDAMB231 CTR	Methionine--tRNA ligase_ cytoplasmic	MARS1	75.392	5.6046e-05	0.00062285	MDAMB231-HS578t; MDAMB468-HS578t
Q9BY32	1	189.16	MDAMB231 CTR	Hs 578T CTR	Inosine triphosphate pyrophosphatase	ITPA	73.432	6.0469e-05	0.0006545	MDAMB231-HS578t; MDAMB468-HS578t
O60831	3	4.39226	Hs 578T CTR	MDAMB468 CTR	PRA1 family protein 2	PRAF2	73.32	6.0737e-05	0.0006545	MDAMB231-HS578t; MDAMB468-HS578t
Q9BX40	5	2.70774	Hs 578T CTR	MDAMB468 CTR	Protein LSM14 homolog B	LSM14B	73.222	6.097e-05	0.0006545	MDAMB231-HS578t; MDAMB468-HS578t
Q16658	16	3.71932	Hs 578T CTR	MDAMB468 CTR	Fascin	FSCN1	72.85	6.1872e-05	0.00065532	MDAMB231-HS578t; MDAMB468-HS578t
P52926	1	54.1533	MDAMB231 CTR	Hs 578T CTR	High mobility group protein HMGI-C	HMGA2	70.836	6.7074e-05	0.00069732	MDAMB231-HS578t; MDAMB468-HS578t
Q03252	17	2.04578	Hs 578T CTR	MDAMB468 CTR	Lamin-B2	LMNB2	69.257	7.1568e-05	0.00071455	MDAMB231-HS578t; MDAMB468-HS578t
Q9UHB9	17	2.04487	Hs 578T CTR	MDAMB231 CTR	Signal recognition particle subunit SRP68	SRP68	69.253	7.1581e-05	0.00071455	MDAMB231-HS578t; MDAMB468-HS578t
P16070	16	1.76368	Hs 578T CTR	MDAMB468 CTR	CD44 antigen	CD44	69.031	7.2246e-05	0.000718	MDAMB231-HS578t; MDAMB468-HS578t
O60841	18	2.07288	MDAMB231 CTR	Hs 578T CTR	Eukaryotic translation initiation factor 5B	EIF5B	65.202	8.5108e-05	0.00082053	MDAMB231-HS578t; MDAMB468-HS578t
Q92688	9	3.06234	Hs 578T CTR	MDAMB468 CTR	Acidic leucine-rich nuclear phosphoprotein 32 family member B	ANP32B	64.968	8.599e-05	0.00082203	MDAMB231-HS578t; MDAMB468-HS578t
P00403	5	3.68002	MDAMB468 CTR	Hs 578T CTR	Cytochrome c oxidase subunit 2	MT-CO2	64.253	8.8764e-05	0.00084139	MDAMB231-HS578t; MDAMB468-HS578t
Q96F24	2	2.6056	Hs 578T CTR	MDAMB231 CTR	Nuclear receptor-binding factor 2	NRBF2	63.421	9.214e-05	0.00085542	MDAMB231-HS578t; MDAMB468-HS578t
P04439	14	3.42783	Hs 578T CTR	MDAMB468 CTR	HLA class I histocompatibility antigen_ A alpha chain	HLA-A	62.259	9.7152e-05	0.00088292	MDAMB231-HS578t; MDAMB468-HS578t
P12036	8	3.41595	Hs 578T CTR	MDAMB231 CTR	Neurofilament heavy polypeptide	NEFH	61.893	9.8805e-05	0.00089162	MDAMB231-HS578t; MDAMB468-HS578t
Q05519	5	2.93957	Hs 578T CTR	MDAMB231 CTR	Serine/arginine-rich splicing factor 11	SRSF11	59.039	0.00011308	0.00097831	MDAMB231-HS578t; MDAMB468-HS578t
P55735	9	1.81771	Hs 578T CTR	MDAMB231 CTR	Protein SEC13 homolog	SEC13	58.343	0.00011697	0.00099953	MDAMB231-HS578t; MDAMB468-HS578t
Q01995	20	5.54255	Hs 578T CTR	MDAMB231 CTR	Transgelin	TAGLN	56.336	0.00012924	0.0010603	MDAMB231-HS578t; MDAMB468-HS578t
Q02318	1	13.0075	MDAMB468 CTR	Hs 578T CTR	Sterol 26-hydroxylase_ mitochondrial	CYP27A1	56.18	0.00013027	0.0010648	MDAMB231-HS578t; MDAMB468-HS578t
O43776	17	2.4307	Hs 578T CTR	MDAMB231 CTR	Asparagine--tRNA ligase_ cytoplasmic	NARS1	54.012	0.0001457	0.0011697	MDAMB231-HS578t; MDAMB468-HS578t
P35908	10	1.50416	Hs 578T CTR	MDAMB231 CTR	Keratin_ type II cytoskeletal 2 epidermal	KRT2	53.852	0.00014694	0.0011755	MDAMB231-HS578t; MDAMB468-HS578t
P41227	5	2.00278	Hs 578T CTR	MDAMB231 CTR	N-alpha-acetyltransferase 10	NAA10	53.784	0.00014747	0.0011756	MDAMB231-HS578t; MDAMB468-HS578t
Q8N0U2	1	2.50482	Hs 578T CTR	MDAMB231 CTR	Transmembrane protein 61	TMEM61	53.561	0.00014922	0.0011853	MDAMB231-HS578t; MDAMB468-HS578t
P07858	14	4.26385	Hs 578T CTR	MDAMB231 CTR	Cathepsin B	CTSB	53.376	0.00015069	0.0011889	MDAMB231-HS578t; MDAMB468-HS578t
P30566	7	1.96952	MDAMB231 CTR	Hs 578T CTR	Adenylosuccinate lyase	ADSL	53.068	0.00015319	0.0011969	MDAMB231-HS578t; MDAMB468-HS578t
P78406	6	3.71657	Hs 578T CTR	MDAMB468 CTR	mRNA export factor	RAE1	52.93	0.00015432	0.0012005	MDAMB231-HS578t; MDAMB468-HS578t
P11021	37	2.24495	Hs 578T CTR	MDAMB231 CTR	Endoplasmic reticulum chaperone BiP	HSPA5	52.568	0.00015736	0.0012138	MDAMB231-HS578t; MDAMB468-HS578t
P61326	3	2.88255	MDAMB468 CTR	Hs 578T CTR	Protein mago nashi homolog	MAGOH	52.437	0.00015848	0.0012155	MDAMB231-HS578t; MDAMB468-HS578t
P49589	16	2.1813	Hs 578T CTR	MDAMB468 CTR	Cysteine--tRNA ligase_ cytoplasmic	CARS1	52.307	0.00015959	0.0012164	MDAMB231-HS578t; MDAMB468-HS578t
P08243	19	2.04186	Hs 578T CTR	MDAMB468 CTR	Asparagine synthetase [glutamine-hydrolyzing]	ASNS	51.884	0.00016332	0.0012322	MDAMB231-HS578t; MDAMB468-HS578t
P07203	2	7.93638	Hs 578T CTR	MDAMB231 CTR	Glutathione peroxidase 1	GPX1	51.076	0.00017075	0.0012796	MDAMB231-HS578t; MDAMB468-HS578t
P42785	2	107.524	Hs 578T CTR	MDAMB468 CTR	Lysosomal Pro-X carboxypeptidase	PRCP	48.977	0.00019228	0.0013903	MDAMB231-HS578t; MDAMB468-HS578t
O94925	10	1.87235	Hs 578T CTR	MDAMB468 CTR	Glutaminase kidney isoform_ mitochondrial	GLS	48.53	0.00019732	0.0014057	MDAMB231-HS578t; MDAMB468-HS578t
O95361	10	2.07219	Hs 578T CTR	MDAMB468 CTR	Tripartite motif-containing protein 16	TRIM16	48.487	0.00019782	0.0014057	MDAMB231-HS578t; MDAMB468-HS578t
P27816	42	2.42103	Hs 578T CTR	MDAMB468 CTR	Microtubule-associated protein 4	MAP4	48.481	0.00019789	0.0014057	MDAMB231-HS578t; MDAMB468-HS578t
Q13418	6	3.08578	Hs 578T CTR	MDAMB231 CTR	Integrin-linked protein kinase	ILK	48.286	0.00020015	0.0014155	MDAMB231-HS578t; MDAMB468-HS578t
P09211	10	3.16787	Hs 578T CTR	MDAMB231 CTR	Glutathione S-transferase P	GSTP1	48.166	0.00020156	0.001421	MDAMB231-HS578t; MDAMB468-HS578t
Q8WUD1	2	4.83938	Hs 578T CTR	MDAMB231 CTR	Ras-related protein Rab-2B	RAB2B	47.842	0.00020545	0.0014292	MDAMB231-HS578t; MDAMB468-HS578t
Q13162	12	1.87858	Hs 578T CTR	MDAMB231 CTR	Peroxiredoxin-4	PRDX4	47.683	0.00020738	0.0014351	MDAMB231-HS578t; MDAMB468-HS578t
Q92764	6	2.10097	Hs 578T CTR	MDAMB231 CTR	Keratin_ type I cuticular Ha5	KRT35	47.561	0.00020889	0.0014367	MDAMB231-HS578t; MDAMB468-HS578t
Q96GA7	1	2.26948	Hs 578T CTR	MDAMB231 CTR	Serine dehydratase-like	SDSL	47.388	0.00021105	0.0014428	MDAMB231-HS578t; MDAMB468-HS578t
P68032	16	3.21868	Hs 578T CTR	MDAMB468 CTR	Actin_ alpha cardiac muscle 1	ACTC1	46.894	0.00021738	0.0014771	MDAMB231-HS578t; MDAMB468-HS578t
Q6PI98	3	4.45114	Hs 578T CTR	MDAMB468 CTR	INO80 complex subunit C	INO80C	46.798	0.00021864	0.0014812	MDAMB231-HS578t; MDAMB468-HS578t
Q96DA2	1	4.16782	Hs 578T CTR	MDAMB231 CTR	Ras-related protein Rab-39B	RAB39B	46.738	0.00021944	0.0014822	MDAMB231-HS578t; MDAMB468-HS578t
Q9NUQ9	8	3.19178	Hs 578T CTR	MDAMB468 CTR	CYFIP-related Rac1 interactor B	CYRIB	46.434	0.0002235	0.0015005	MDAMB231-HS578t; MDAMB468-HS578t
P61019	13	1.89435	Hs 578T CTR	MDAMB231 CTR	Ras-related protein Rab-2A	RAB2A	46.406	0.00022389	0.0015005	MDAMB231-HS578t; MDAMB468-HS578t
P35579	173	2.62514	Hs 578T CTR	MDAMB468 CTR	Myosin-9	MYH9	46.291	0.00022545	0.0015005	MDAMB231-HS578t; MDAMB468-HS578t
O75436	8	2.82626	Hs 578T CTR	MDAMB231 CTR	Vacuolar protein sorting-associated protein 26A	VPS26A	45.995	0.00022956	0.0015143	MDAMB231-HS578t; MDAMB468-HS578t
Q15063	4	3.25867	Hs 578T CTR	MDAMB231 CTR	Periostin	POSTN	45.543	0.00023603	0.0015429	MDAMB231-HS578t; MDAMB468-HS578t
Q13423	12	2.40118	Hs 578T CTR	MDAMB231 CTR	NAD(P) transhydrogenase_ mitochondrial	NNT	45.277	0.00023996	0.0015556	MDAMB231-HS578t; MDAMB468-HS578t
P61024	3	37.9372	MDAMB231 CTR	Hs 578T CTR	Cyclin-dependent kinases regulatory subunit 1	CKS1B	45.109	0.00024249	0.001563	MDAMB231-HS578t; MDAMB468-HS578t
P26583	5	2.3725	MDAMB231 CTR	Hs 578T CTR	High mobility group protein B2	HMGB2	44.928	0.00024524	0.0015742	MDAMB231-HS578t; MDAMB468-HS578t
Q96J01	1	2.31871	MDAMB468 CTR	Hs 578T CTR	THO complex subunit 3	THOC3	43.78	0.00026375	0.0016391	MDAMB231-HS578t; MDAMB468-HS578t
Q15050	3	2.88154	MDAMB231 CTR	Hs 578T CTR	Ribosome biogenesis regulatory protein homolog	RRS1	43.329	0.00027153	0.0016737	MDAMB231-HS578t; MDAMB468-HS578t
O15460	16	4.77221	Hs 578T CTR	MDAMB468 CTR	Prolyl 4-hydroxylase subunit alpha-2	P4HA2	42.672	0.00028341	0.001728	MDAMB231-HS578t; MDAMB468-HS578t
Q99439	9	1.99145	Hs 578T CTR	MDAMB231 CTR	Calponin-2	CNN2	42.203	0.00029233	0.0017586	MDAMB231-HS578t; MDAMB468-HS578t
Q8TBY8	5	2.70362	Hs 578T CTR	MDAMB468 CTR	Polyamine-modulated factor 1-binding protein 1	PMFBP1	41.981	0.00029668	0.0017707	MDAMB231-HS578t; MDAMB468-HS578t
P09622	11	2.58606	Hs 578T CTR	MDAMB231 CTR	Dihydrolipoyl dehydrogenase_ mitochondrial	DLD	41.434	0.00030776	0.0018081	MDAMB231-HS578t; MDAMB468-HS578t
O94808	7	3.40954	Hs 578T CTR	MDAMB231 CTR	Glutamine--fructose-6-phosphate aminotransferase [isomerizing] 2	GFPT2	40.934	0.0003184	0.0018466	MDAMB231-HS578t; MDAMB468-HS578t
P47813	8	2.21358	Hs 578T CTR	MDAMB468 CTR	Eukaryotic translation initiation factor 1A_ X-chromosomal	EIF1AX	40.39	0.00033053	0.0018872	MDAMB231-HS578t; MDAMB468-HS578t
P53621	43	1.62257	Hs 578T CTR	MDAMB468 CTR	Coatomer subunit alpha	COPA	40.293	0.00033275	0.0018909	MDAMB231-HS578t; MDAMB468-HS578t
Q16678	2	16.6821	MDAMB468 CTR	Hs 578T CTR	Cytochrome P450 1B1	CYP1B1	39.947	0.00034085	0.0019321	MDAMB231-HS578t; MDAMB468-HS578t
Q8TF05	1	9.94485	Hs 578T CTR	MDAMB468 CTR	Serine/threonine-protein phosphatase 4 regulatory subunit 1	PPP4R1	39.569	0.00035	0.0019606	MDAMB231-HS578t; MDAMB468-HS578t
O60936	2	2.50363	MDAMB468 CTR	Hs 578T CTR	Nucleolar protein 3	NOL3	38.598	0.00037509	0.0020741	MDAMB231-HS578t; MDAMB468-HS578t
O95573	10	2.08115	Hs 578T CTR	MDAMB231 CTR	Fatty acid CoA ligase Acsl3	ACSL3	38.453	0.00037904	0.0020823	MDAMB231-HS578t; MDAMB468-HS578t
P60660	13	2.52775	Hs 578T CTR	MDAMB468 CTR	Myosin light polypeptide 6	MYL6	38.364	0.00038149	0.0020839	MDAMB231-HS578t; MDAMB468-HS578t
Q15061	1	8.2857	MDAMB468 CTR	Hs 578T CTR	WD repeat-containing protein 43	WDR43	37.668	0.00040143	0.002177	MDAMB231-HS578t; MDAMB468-HS578t
Q14240	10	1.5234	Hs 578T CTR	MDAMB231 CTR	Eukaryotic initiation factor 4A-II	EIF4A2	37.341	0.00041128	0.0022144	MDAMB231-HS578t; MDAMB468-HS578t
P42167	13	2.63724	MDAMB468 CTR	Hs 578T CTR	Lamina-associated polypeptide 2_ isoforms beta/gamma	TMPO	37.249	0.00041408	0.0022155	MDAMB231-HS578t; MDAMB468-HS578t
P61457	2	2.25758	MDAMB468 CTR	Hs 578T CTR	Pterin-4-alpha-carbinolamine dehydratase	PCBD1	37.239	0.00041442	0.0022155	MDAMB231-HS578t; MDAMB468-HS578t
Q9BVK6	7	1.73262	Hs 578T CTR	MDAMB231 CTR	Transmembrane emp24 domain-containing protein 9	TMED9	37.062	0.00041993	0.0022291	MDAMB231-HS578t; MDAMB468-HS578t
P23284	13	1.80215	Hs 578T CTR	MDAMB231 CTR	Peptidyl-prolyl cis-trans isomerase B	PPIB	36.891	0.00042533	0.0022405	MDAMB231-HS578t; MDAMB468-HS578t
P54105	2	16.202	MDAMB231 CTR	Hs 578T CTR	Methylosome subunit pICln	CLNS1A	36.869	0.00042605	0.0022405	MDAMB231-HS578t; MDAMB468-HS578t
O43399	11	1.84709	Hs 578T CTR	MDAMB468 CTR	Tumor protein D54	TPD52L2	35.92	0.00045798	0.002369	MDAMB231-HS578t; MDAMB468-HS578t
P27449	3	2.22723	Hs 578T CTR	MDAMB231 CTR	V-type proton ATPase 16 kDa proteolipid subunit	ATP6V0C	35.894	0.00045889	0.002369	MDAMB231-HS578t; MDAMB468-HS578t
P19971	3	3.26105	Hs 578T CTR	MDAMB231 CTR	Thymidine phosphorylase	TYMP	35.798	0.00046231	0.0023812	MDAMB231-HS578t; MDAMB468-HS578t
Q27J81	9	7.45738	MDAMB231 CTR	Hs 578T CTR	Inverted formin-2	INF2	35.427	0.00047584	0.0024398	MDAMB231-HS578t; MDAMB468-HS578t
Q9ULC4	7	1.68109	Hs 578T CTR	MDAMB231 CTR	Malignant T-cell-amplified sequence 1	MCTS1	35.302	0.00048052	0.0024483	MDAMB231-HS578t; MDAMB468-HS578t
Q99958	1	2.53708	Hs 578T CTR	MDAMB231 CTR	Forkhead box protein C2	FOXC2	34.844	0.00049816	0.0025198	MDAMB231-HS578t; MDAMB468-HS578t
P09669	1	10.2933	MDAMB468 CTR	Hs 578T CTR	Cytochrome c oxidase subunit 6C	COX6C	34.603	0.00050781	0.0025463	MDAMB231-HS578t; MDAMB468-HS578t
Q96A23	1	2.77559	Hs 578T CTR	MDAMB231 CTR	Copine-4	CPNE4	34.595	0.00050815	0.0025463	MDAMB231-HS578t; MDAMB468-HS578t
P30086	15	1.98175	Hs 578T CTR	MDAMB231 CTR	Phosphatidylethanolamine-binding protein 1	PEBP1	34.517	0.00051129	0.0025463	MDAMB231-HS578t; MDAMB468-HS578t
P36542	7	1.92492	Hs 578T CTR	MDAMB231 CTR	ATP synthase subunit gamma_ mitochondrial	ATP5F1C	34.443	0.00051433	0.0025558	MDAMB231-HS578t; MDAMB468-HS578t
P20962	2	3.42714	Hs 578T CTR	MDAMB468 CTR	Parathymosin	PTMS	34.135	0.00052726	0.0025802	MDAMB231-HS578t; MDAMB468-HS578t
O15511	7	1.98297	Hs 578T CTR	MDAMB231 CTR	Actin-related protein 2/3 complex subunit 5	ARPC5	34.015	0.00053238	0.0025997	MDAMB231-HS578t; MDAMB468-HS578t
Q03518	3	2.91593	Hs 578T CTR	MDAMB231 CTR	Antigen peptide transporter 1	TAP1	33.788	0.00054229	0.002631	MDAMB231-HS578t; MDAMB468-HS578t
Q9BQ39	5	2.1341	MDAMB468 CTR	Hs 578T CTR	ATP-dependent RNA helicase DDX50	DDX50	33.723	0.00054519	0.0026368	MDAMB231-HS578t; MDAMB468-HS578t
Q6P1J9	5	2.87618	MDAMB231 CTR	Hs 578T CTR	Parafibromin	CDC73	33.64	0.00054889	0.0026459	MDAMB231-HS578t; MDAMB468-HS578t
P06454	3	2.9785	MDAMB231 CTR	Hs 578T CTR	Prothymosin alpha	PTMA	33.324	0.00056334	0.0026926	MDAMB231-HS578t; MDAMB468-HS578t
Q9H0B6	5	4.23508	MDAMB468 CTR	Hs 578T CTR	Kinesin light chain 2	KLC2	33.281	0.00056535	0.0026965	MDAMB231-HS578t; MDAMB468-HS578t
P30044	11	2.29249	Hs 578T CTR	MDAMB231 CTR	Peroxiredoxin-5_ mitochondrial	PRDX5	32.86	0.00058552	0.0027791	MDAMB231-HS578t; MDAMB468-HS578t
P63261	79	1.58539	Hs 578T CTR	MDAMB231 CTR	Actin_ cytoplasmic 2	ACTG1	32.692	0.00059384	0.0028027	MDAMB231-HS578t; MDAMB468-HS578t
Q96AG4	10	2.39052	Hs 578T CTR	MDAMB231 CTR	Leucine-rich repeat-containing protein 59	LRRC59	32.322	0.00061267	0.0028535	MDAMB231-HS578t; MDAMB468-HS578t
P26639	41	2.02951	Hs 578T CTR	MDAMB231 CTR	Threonine--tRNA ligase 1_ cytoplasmic	TARS1	32.29	0.00061433	0.0028535	MDAMB231-HS578t; MDAMB468-HS578t
O75051	5	1.77294	Hs 578T CTR	MDAMB231 CTR	Plexin-A2	PLXNA2	32.288	0.00061443	0.0028535	MDAMB231-HS578t; MDAMB468-HS578t
Q9NQC3	22	2.00037	Hs 578T CTR	MDAMB468 CTR	Reticulon-4	RTN4	32.012	0.00062908	0.0028963	MDAMB231-HS578t; MDAMB468-HS578t
P26447	3	8.29096	Hs 578T CTR	MDAMB468 CTR	Protein S100-A4	S100A4	31.462	0.00065972	0.0030068	MDAMB231-HS578t; MDAMB468-HS578t
Q9C0D0	1	2.62441	MDAMB468 CTR	Hs 578T CTR	Phosphatase and actin regulator 1	PHACTR1	31.36	0.00066557	0.0030212	MDAMB231-HS578t; MDAMB468-HS578t
P47756	17	1.73058	Hs 578T CTR	MDAMB468 CTR	F-actin-capping protein subunit beta	CAPZB	31.215	0.0006741	0.0030476	MDAMB231-HS578t; MDAMB468-HS578t
Q9NTJ3	7	2.5716	MDAMB231 CTR	Hs 578T CTR	Structural maintenance of chromosomes protein 4	SMC4	30.968	0.00068891	0.003096	MDAMB231-HS578t; MDAMB468-HS578t
P55786	30	1.58217	Hs 578T CTR	MDAMB468 CTR	Puromycin-sensitive aminopeptidase	NPEPPS	30.892	0.00069356	0.0031107	MDAMB231-HS578t; MDAMB468-HS578t
Q9BXV9	1	5.66313	MDAMB468 CTR	Hs 578T CTR	EKC/KEOPS complex subunit GON7	GON7	30.654	0.00070836	0.0031582	MDAMB231-HS578t; MDAMB468-HS578t
Q67FW5	2	46.5233	Hs 578T CTR	MDAMB468 CTR	UDP-GlcNAc:betaGal beta-1_3-N-acetylglucosaminyltransferase-like protein 1	B3GNTL1	30.525	0.00071655	0.0031647	MDAMB231-HS578t; MDAMB468-HS578t
Q9Y383	7	1.9227	MDAMB468 CTR	Hs 578T CTR	Putative RNA-binding protein Luc7-like 2	LUC7L2	30.232	0.0007357	0.0032018	MDAMB231-HS578t; MDAMB468-HS578t
P60981	8	1.95223	Hs 578T CTR	MDAMB231 CTR	Destrin	DSTN	30.218	0.00073659	0.0032018	MDAMB231-HS578t; MDAMB468-HS578t
P02452	31	5.50704	Hs 578T CTR	MDAMB231 CTR	Collagen alpha-1(I) chain	COL1A1	30.173	0.0007396	0.0032087	MDAMB231-HS578t; MDAMB468-HS578t
P53597	2	2.47889	Hs 578T CTR	MDAMB468 CTR	Succinate--CoA ligase [ADP/GDP-forming] subunit alpha_ mitochondrial	SUCLG1	29.716	0.00077104	0.003326	MDAMB231-HS578t; MDAMB468-HS578t
P11177	9	2.39	Hs 578T CTR	MDAMB468 CTR	Pyruvate dehydrogenase E1 component subunit beta_ mitochondrial	PDHB	29.349	0.00079761	0.0033849	MDAMB231-HS578t; MDAMB468-HS578t
Q969Z0	4	7.20165	MDAMB468 CTR	Hs 578T CTR	FAST kinase domain-containing protein 4	TBRG4	29.334	0.00079874	0.0033849	MDAMB231-HS578t; MDAMB468-HS578t
P04637	6	4.02863	MDAMB468 CTR	Hs 578T CTR	Cellular tumor antigen p53	TP53	29.32	0.00079972	0.0033849	MDAMB231-HS578t; MDAMB468-HS578t
P53396	48	1.61957	Hs 578T CTR	MDAMB231 CTR	ATP-citrate synthase	ACLY	29.25	0.00080495	0.0034007	MDAMB231-HS578t; MDAMB468-HS578t
P61160	14	1.80063	Hs 578T CTR	MDAMB231 CTR	Actin-related protein 2	ACTR2	29.215	0.00080759	0.0034013	MDAMB231-HS578t; MDAMB468-HS578t
Q16576	13	1.3992	Hs 578T CTR	MDAMB468 CTR	Histone-binding protein RBBP7	RBBP7	29.001	0.00082393	0.0034422	MDAMB231-HS578t; MDAMB468-HS578t
Q9NY65	12	3.04524	Hs 578T CTR	MDAMB231 CTR	Tubulin alpha-8 chain	TUBA8	28.937	0.00082885	0.00345	MDAMB231-HS578t; MDAMB468-HS578t
P30101	31	2.16744	Hs 578T CTR	MDAMB231 CTR	Protein disulfide-isomerase A3	PDIA3	28.838	0.00083663	0.0034632	MDAMB231-HS578t; MDAMB468-HS578t
Q9UBR2	7	2.01494	Hs 578T CTR	MDAMB468 CTR	Cathepsin Z	CTSZ	28.467	0.00086652	0.0035686	MDAMB231-HS578t; MDAMB468-HS578t
P35241	13	1.59995	Hs 578T CTR	MDAMB468 CTR	Radixin	RDX	28.464	0.00086683	0.0035686	MDAMB231-HS578t; MDAMB468-HS578t
Q9BYG3	1	3.41164	MDAMB231 CTR	Hs 578T CTR	MKI67 FHA domain-interacting nucleolar phosphoprotein	NIFK	28.189	0.00088998	0.0036481	MDAMB231-HS578t; MDAMB468-HS578t
P04844	20	1.77777	Hs 578T CTR	MDAMB231 CTR	Dolichyl-diphosphooligosaccharide--protein glycosyltransferase subunit 2	RPN2	27.968	0.00090909	0.0036829	MDAMB231-HS578t; MDAMB468-HS578t
Q8TD47	1	2.52803	Hs 578T CTR	MDAMB231 CTR	40S ribosomal protein S4_ Y isoform 2	RPS4Y2	27.966	0.00090929	0.0036829	MDAMB231-HS578t; MDAMB468-HS578t
P24752	11	2.45669	Hs 578T CTR	MDAMB231 CTR	Acetyl-CoA acetyltransferase_ mitochondrial	ACAT1	27.941	0.00091152	0.0036844	MDAMB231-HS578t; MDAMB468-HS578t
P46060	16	1.48813	MDAMB468 CTR	Hs 578T CTR	Ran GTPase-activating protein 1	RANGAP1	27.906	0.00091457	0.0036844	MDAMB231-HS578t; MDAMB468-HS578t
Q9Y617	17	1.86975	Hs 578T CTR	MDAMB231 CTR	Phosphoserine aminotransferase	PSAT1	27.885	0.00091652	0.0036857	MDAMB231-HS578t; MDAMB468-HS578t
P15311	28	2.01626	MDAMB468 CTR	Hs 578T CTR	Ezrin	EZR	27.858	0.00091889	0.0036886	MDAMB231-HS578t; MDAMB468-HS578t
Q96C57	2	7.67118	MDAMB231 CTR	Hs 578T CTR	Protein CUSTOS	CUSTOS	27.732	0.00093026	0.0037145	MDAMB231-HS578t; MDAMB468-HS578t
P61769	4	2.84655	Hs 578T CTR	MDAMB231 CTR	Beta-2-microglobulin	B2M	27.489	0.00095263	0.0037837	MDAMB231-HS578t; MDAMB468-HS578t
Q9Y2D5	4	5.37884	MDAMB231 CTR	Hs 578T CTR	A-kinase anchor protein 2	AKAP2	27.361	0.00096478	0.0038252	MDAMB231-HS578t; MDAMB468-HS578t
Q96QS3	2	10.4451	MDAMB468 CTR	Hs 578T CTR	Homeobox protein ARX	ARX	27.287	0.00097188	0.0038466	MDAMB231-HS578t; MDAMB468-HS578t
Q9BTV4	10	1.88294	Hs 578T CTR	MDAMB231 CTR	Transmembrane protein 43	TMEM43	27.071	0.00099293	0.0039135	MDAMB231-HS578t; MDAMB468-HS578t
Q14152	44	1.28853	Hs 578T CTR	MDAMB468 CTR	Eukaryotic translation initiation factor 3 subunit A	EIF3A	26.988	0.0010012	0.0039351	MDAMB231-HS578t; MDAMB468-HS578t
Q86W25	3	3.43921	MDAMB468 CTR	Hs 578T CTR	NACHT_ LRR and PYD domains-containing protein 13	NLRP13	26.914	0.0010087	0.0039506	MDAMB231-HS578t; MDAMB468-HS578t
Q9NUP9	1	2.08155	MDAMB468 CTR	Hs 578T CTR	Protein lin-7 homolog C	LIN7C	26.88	0.0010121	0.0039515	MDAMB231-HS578t; MDAMB468-HS578t
Q9BT78	20	1.39845	Hs 578T CTR	MDAMB468 CTR	COP9 signalosome complex subunit 4	COPS4	26.662	0.0010346	0.0039865	MDAMB231-HS578t; MDAMB468-HS578t
P62495	8	1.55186	Hs 578T CTR	MDAMB231 CTR	Eukaryotic peptide chain release factor subunit 1	ETF1	26.619	0.0010391	0.0039937	MDAMB231-HS578t; MDAMB468-HS578t
Q75VX8	1	2.72718	Hs 578T CTR	MDAMB231 CTR	GRB2-associated and regulator of MAPK protein 2	GAREM2	26.533	0.0010482	0.0040149	MDAMB231-HS578t; MDAMB468-HS578t
Q9Y696	20	2.75007	Hs 578T CTR	MDAMB468 CTR	Chloride intracellular channel protein 4	CLIC4	26.336	0.0010694	0.0040754	MDAMB231-HS578t; MDAMB468-HS578t
P35609	8	1.76507	Hs 578T CTR	MDAMB231 CTR	Alpha-actinin-2	ACTN2	26.079	0.0010981	0.0041289	MDAMB231-HS578t; MDAMB468-HS578t
Q9BPW8	3	2.4362	MDAMB468 CTR	Hs 578T CTR	Protein NipSnap homolog 1	NIPSNAP1	25.691	0.0011432	0.004242	MDAMB231-HS578t; MDAMB468-HS578t
P14649	5	1.94878	Hs 578T CTR	MDAMB231 CTR	Myosin light chain 6B	MYL6B	25.648	0.0011484	0.0042483	MDAMB231-HS578t; MDAMB468-HS578t
Q9Y3B8	5	1.82893	Hs 578T CTR	MDAMB231 CTR	Oligoribonuclease_ mitochondrial	REXO2	25.602	0.0011539	0.0042483	MDAMB231-HS578t; MDAMB468-HS578t
Q6PIU2	9	3.34633	MDAMB468 CTR	Hs 578T CTR	Neutral cholesterol ester hydrolase 1	NCEH1	25.567	0.0011581	0.0042548	MDAMB231-HS578t; MDAMB468-HS578t
P23528	10	2.31403	Hs 578T CTR	MDAMB231 CTR	Cofilin-1	CFL1	25.327	0.0011878	0.0043332	MDAMB231-HS578t; MDAMB468-HS578t
Q9NYY3	3	3.23135	Hs 578T CTR	MDAMB231 CTR	Serine/threonine-protein kinase PLK2	PLK2	25.326	0.001188	0.0043332	MDAMB231-HS578t; MDAMB468-HS578t
P22314	46	1.5916	Hs 578T CTR	MDAMB231 CTR	Ubiquitin-like modifier-activating enzyme 1	UBA1	25.156	0.0012096	0.0043904	MDAMB231-HS578t; MDAMB468-HS578t
Q6NYC8	2	7.61002	Hs 578T CTR	MDAMB468 CTR	Phostensin	PPP1R18	25.095	0.0012175	0.0043946	MDAMB231-HS578t; MDAMB468-HS578t
Q9Y6M9	3	2.2108	Hs 578T CTR	MDAMB468 CTR	NADH dehydrogenase [ubiquinone] 1 beta subcomplex subunit 9	NDUFB9	24.996	0.0012305	0.0044203	MDAMB231-HS578t; MDAMB468-HS578t
Q13642	2	28.1227	Hs 578T CTR	MDAMB468 CTR	Four and a half LIM domains protein 1	FHL1	24.892	0.0012443	0.0044557	MDAMB231-HS578t; MDAMB468-HS578t
Q9UQE7	3	1.7046	Hs 578T CTR	MDAMB231 CTR	Structural maintenance of chromosomes protein 3	SMC3	24.841	0.0012512	0.0044703	MDAMB231-HS578t; MDAMB468-HS578t
Q96SB4	4	4.59386	MDAMB231 CTR	Hs 578T CTR	SRSF protein kinase 1	SRPK1	24.817	0.0012544	0.0044703	MDAMB231-HS578t; MDAMB468-HS578t
Q7Z4W1	2	2.75728	MDAMB468 CTR	Hs 578T CTR	L-xylulose reductase	DCXR	24.773	0.0012604	0.0044703	MDAMB231-HS578t; MDAMB468-HS578t
Q9H4B7	4	1.95467	Hs 578T CTR	MDAMB468 CTR	Tubulin beta-1 chain	TUBB1	24.765	0.0012614	0.0044703	MDAMB231-HS578t; MDAMB468-HS578t
P01588	2	2.3491	MDAMB231 CTR	Hs 578T CTR	Erythropoietin	EPO	24.753	0.0012631	0.0044703	MDAMB231-HS578t; MDAMB468-HS578t
Q01581	6	1.75354	Hs 578T CTR	MDAMB231 CTR	Hydroxymethylglutaryl-CoA synthase_ cytoplasmic	HMGCS1	24.747	0.0012639	0.0044703	MDAMB231-HS578t; MDAMB468-HS578t
Q05048	4	4.63249	MDAMB231 CTR	Hs 578T CTR	Cleavage stimulation factor subunit 1	CSTF1	24.73	0.0012662	0.0044703	MDAMB231-HS578t; MDAMB468-HS578t
Q9BQG0	28	2.00645	MDAMB231 CTR	Hs 578T CTR	Myb-binding protein 1A	MYBBP1A	24.562	0.0012895	0.0045446	MDAMB231-HS578t; MDAMB468-HS578t
Q5SRE7	1	2.77777	MDAMB231 CTR	Hs 578T CTR	Phytanoyl-CoA dioxygenase domain-containing protein 1	PHYHD1	24.414	0.0013106	0.0045982	MDAMB231-HS578t; MDAMB468-HS578t
O15498	5	2.35478	Hs 578T CTR	MDAMB231 CTR	Synaptobrevin homolog YKT6	YKT6	24.154	0.0013485	0.0046949	MDAMB231-HS578t; MDAMB468-HS578t
P10515	7	2.51223	MDAMB231 CTR	Hs 578T CTR	Dihydrolipoyllysine-residue acetyltransferase component of pyruvate dehydrogenase complex_ mitochondrial	DLAT	23.929	0.0013827	0.0047697	MDAMB231-HS578t; MDAMB468-HS578t
O75396	7	2.26256	Hs 578T CTR	MDAMB231 CTR	Vesicle-trafficking protein SEC22b	SEC22B	23.875	0.001391	0.0047909	MDAMB231-HS578t; MDAMB468-HS578t
Q15758	7	2.38783	Hs 578T CTR	MDAMB468 CTR	Neutral amino acid transporter B(0)	SLC1A5	23.781	0.0014057	0.0048282	MDAMB231-HS578t; MDAMB468-HS578t
P08123	11	8.36601	Hs 578T CTR	MDAMB231 CTR	Collagen alpha-2(I) chain	COL1A2	23.77	0.0014074	0.0048282	MDAMB231-HS578t; MDAMB468-HS578t
P53992	10	2.29492	Hs 578T CTR	MDAMB231 CTR	Protein transport protein Sec24C	SEC24C	23.698	0.0014188	0.0048432	MDAMB231-HS578t; MDAMB468-HS578t
Q9P298	1	6.95685	MDAMB468 CTR	Hs 578T CTR	HIG1 domain family member 1B	HIGD1B	23.697	0.0014191	0.0048432	MDAMB231-HS578t; MDAMB468-HS578t
P14625	53	1.70635	Hs 578T CTR	MDAMB468 CTR	Endoplasmin	HSP90B1	23.628	0.0014301	0.004873	MDAMB231-HS578t; MDAMB468-HS578t
P46063	10	1.72605	Hs 578T CTR	MDAMB231 CTR	ATP-dependent DNA helicase Q1	RECQL	23.615	0.0014321	0.004873	MDAMB231-HS578t; MDAMB468-HS578t
P05026	7	1.8649	Hs 578T CTR	MDAMB231 CTR	Sodium/potassium-transporting ATPase subunit beta-1	ATP1B1	23.568	0.0014397	0.0048917	MDAMB231-HS578t; MDAMB468-HS578t
Q9NQ29	2	4.374	MDAMB231 CTR	Hs 578T CTR	Putative RNA-binding protein Luc7-like 1	LUC7L	23.463	0.0014569	0.0049204	MDAMB231-HS578t; MDAMB468-HS578t
P28074	13	1.67089	MDAMB231 CTR	Hs 578T CTR	Proteasome subunit beta type-5	PSMB5	23.361	0.0014739	0.004948	MDAMB231-HS578t; MDAMB468-HS578t
P42126	9	2.14842	Hs 578T CTR	MDAMB468 CTR	Enoyl-CoA delta isomerase 1_ mitochondrial	ECI1	23.325	0.0014799	0.0049531	MDAMB231-HS578t; MDAMB468-HS578t
Q9H223	10	6.15677	Hs 578T CTR	MDAMB468 CTR	EH domain-containing protein 4	EHD4	23.288	0.0014863	0.0049531	MDAMB231-HS578t; MDAMB468-HS578t
O14744	11	2.20473	MDAMB231 CTR	Hs 578T CTR	Protein arginine N-methyltransferase 5	PRMT5	23.24	0.0014943	0.0049683	MDAMB231-HS578t; MDAMB468-HS578t
P14406	2	2.39207	MDAMB468 CTR	Hs 578T CTR	Cytochrome c oxidase subunit 7A2_ mitochondrial	COX7A2	23.192	0.0015026	0.004985	MDAMB231-HS578t; MDAMB468-HS578t
Q9HDC9	13	2.00478	Hs 578T CTR	MDAMB468 CTR	Adipocyte plasma membrane-associated protein	APMAP	22.911	0.0015521	0.0050894	MDAMB231-HS578t; MDAMB468-HS578t
O43252	5	2.98567	MDAMB231 CTR	Hs 578T CTR	Bifunctional 3'-phosphoadenosine 5'-phosphosulfate synthase 1	PAPSS1	22.808	0.0015707	0.0051208	MDAMB231-HS578t; MDAMB468-HS578t
Q8N1N4	4	7.52589	Hs 578T CTR	MDAMB468 CTR	Keratin_ type II cytoskeletal 78	KRT78	22.761	0.0015794	0.005126	MDAMB231-HS578t; MDAMB468-HS578t
P05062	1	3.55418	MDAMB231 CTR	Hs 578T CTR	Fructose-bisphosphate aldolase B	ALDOB	22.751	0.0015811	0.005126	MDAMB231-HS578t; MDAMB468-HS578t
P38405	1	2.82668	Hs 578T CTR	MDAMB468 CTR	Guanine nucleotide-binding protein G(olf) subunit alpha	GNAL	22.725	0.001586	0.005126	MDAMB231-HS578t; MDAMB468-HS578t
Q13610	1	3.1594	MDAMB468 CTR	Hs 578T CTR	Periodic tryptophan protein 1 homolog	PWP1	22.49	0.0016303	0.0052469	MDAMB231-HS578t; MDAMB468-HS578t
Q9NZL4	9	1.71983	Hs 578T CTR	MDAMB231 CTR	Hsp70-binding protein 1	HSPBP1	22.24	0.0016791	0.0053602	MDAMB231-HS578t; MDAMB468-HS578t
P62072	2	1.88571	MDAMB231 CTR	Hs 578T CTR	Mitochondrial import inner membrane translocase subunit Tim10	TIMM10	22.036	0.0017205	0.0054515	MDAMB231-HS578t; MDAMB468-HS578t
P38919	20	1.62167	MDAMB231 CTR	Hs 578T CTR	Eukaryotic initiation factor 4A-III	EIF4A3	21.817	0.0017666	0.0055354	MDAMB231-HS578t; MDAMB468-HS578t
Q8N5N7	2	4.92956	MDAMB231 CTR	Hs 578T CTR	39S ribosomal protein L50_ mitochondrial	MRPL50	21.69	0.001794	0.0056029	MDAMB231-HS578t; MDAMB468-HS578t
Q70Z35	2	1.57424	Hs 578T CTR	MDAMB231 CTR	Phosphatidylinositol 3_4_5-trisphosphate-dependent Rac exchanger 2 protein	PREX2	21.665	0.0017993	0.0056067	MDAMB231-HS578t; MDAMB468-HS578t
P63010	30	1.31893	Hs 578T CTR	MDAMB468 CTR	AP-2 complex subunit beta	AP2B1	21.464	0.001844	0.0056909	MDAMB231-HS578t; MDAMB468-HS578t
P12110	9	2.87687	Hs 578T CTR	MDAMB231 CTR	Collagen alpha-2(VI) chain	COL6A2	21.372	0.001865	0.0057244	MDAMB231-HS578t; MDAMB468-HS578t
Q9Y333	3	2.3816	Hs 578T CTR	MDAMB231 CTR	U6 snRNA-associated Sm-like protein LSm2	LSM2	21.335	0.0018737	0.0057432	MDAMB231-HS578t; MDAMB468-HS578t
Q9BSJ8	25	1.91743	Hs 578T CTR	MDAMB468 CTR	Extended synaptotagmin-1	ESYT1	21.232	0.0018975	0.0057701	MDAMB231-HS578t; MDAMB468-HS578t
P15927	6	2.72754	MDAMB231 CTR	Hs 578T CTR	Replication protein A 32 kDa subunit	RPA2	21.231	0.0018978	0.0057701	MDAMB231-HS578t; MDAMB468-HS578t
P27701	1	1.98473	MDAMB231 CTR	Hs 578T CTR	CD82 antigen	CD82	21.2	0.0019051	0.0057767	MDAMB231-HS578t; MDAMB468-HS578t
Q8N7Z5	4	2.01981	Hs 578T CTR	MDAMB231 CTR	Ankyrin repeat domain-containing protein 31	ANKRD31	21.015	0.0019494	0.0058793	MDAMB231-HS578t; MDAMB468-HS578t
O43172	5	1.64132	MDAMB468 CTR	Hs 578T CTR	U4/U6 small nuclear ribonucleoprotein Prp4	PRPF4	20.881	0.0019825	0.0059635	MDAMB231-HS578t; MDAMB468-HS578t
P17931	6	1.65927	Hs 578T CTR	MDAMB231 CTR	Galectin-3	LGALS3	20.757	0.0020136	0.006029	MDAMB231-HS578t; MDAMB468-HS578t
Q15269	2	6.17859	MDAMB468 CTR	Hs 578T CTR	Periodic tryptophan protein 2 homolog	PWP2	20.649	0.0020414	0.0060781	MDAMB231-HS578t; MDAMB468-HS578t
P52789	12	1.81168	MDAMB231 CTR	Hs 578T CTR	Hexokinase-2	HK2	20.63	0.0020463	0.0060822	MDAMB231-HS578t; MDAMB468-HS578t
Q9Y224	14	1.89247	Hs 578T CTR	MDAMB231 CTR	RNA transcription_ translation and transport factor protein	RTRAF	20.595	0.0020555	0.0061017	MDAMB231-HS578t; MDAMB468-HS578t
Q9BVC6	2	2.02423	Hs 578T CTR	MDAMB468 CTR	Transmembrane protein 109	TMEM109	20.329	0.0021267	0.0062556	MDAMB231-HS578t; MDAMB468-HS578t
Q9BQE5	1	2.75586	MDAMB468 CTR	Hs 578T CTR	Apolipoprotein L2	APOL2	20.318	0.0021296	0.0062556	MDAMB231-HS578t; MDAMB468-HS578t
Q9NQI0	3	2.39943	Hs 578T CTR	MDAMB231 CTR	Probable ATP-dependent RNA helicase DDX4	DDX4	20.238	0.0021517	0.0063042	MDAMB231-HS578t; MDAMB468-HS578t
Q8TD43	3	4.9259	Hs 578T CTR	MDAMB231 CTR	Transient receptor potential cation channel subfamily M member 4	TRPM4	20.181	0.0021676	0.0063424	MDAMB231-HS578t; MDAMB468-HS578t
O95881	6	2.39699	Hs 578T CTR	MDAMB468 CTR	Thioredoxin domain-containing protein 12	TXNDC12	20.117	0.0021855	0.0063784	MDAMB231-HS578t; MDAMB468-HS578t
Q16401	17	1.40959	Hs 578T CTR	MDAMB468 CTR	26S proteasome non-ATPase regulatory subunit 5	PSMD5	19.87	0.0022573	0.0065623	MDAMB231-HS578t; MDAMB468-HS578t
O75607	2	6.81757	MDAMB231 CTR	Hs 578T CTR	Nucleoplasmin-3	NPM3	19.826	0.0022702	0.0065736	MDAMB231-HS578t; MDAMB468-HS578t
Q6IQ32	2	2.33048	Hs 578T CTR	MDAMB468 CTR	Activity-dependent neuroprotector homeobox protein 2	ADNP2	19.656	0.0023217	0.006698	MDAMB231-HS578t; MDAMB468-HS578t
P0DKB6	2	1.92671	MDAMB468 CTR	Hs 578T CTR	Mitochondrial pyruvate carrier 1-like protein	MPC1L	19.553	0.0023536	0.0067517	MDAMB231-HS578t; MDAMB468-HS578t
P35606	34	1.78775	Hs 578T CTR	MDAMB468 CTR	Coatomer subunit beta'	COPB2	19.5	0.0023704	0.0067863	MDAMB231-HS578t; MDAMB468-HS578t
P51965	1	2.30383	MDAMB231 CTR	Hs 578T CTR	Ubiquitin-conjugating enzyme E2 E1	UBE2E1	19.459	0.0023834	0.0067975	MDAMB231-HS578t; MDAMB468-HS578t
O94921	2	1.88108	Hs 578T CTR	MDAMB468 CTR	Cyclin-dependent kinase 14	CDK14	19.079	0.0025084	0.0070649	MDAMB231-HS578t; MDAMB468-HS578t
O95433	9	1.84428	MDAMB468 CTR	Hs 578T CTR	Activator of 90 kDa heat shock protein ATPase homolog 1	AHSA1	18.993	0.002538	0.0071212	MDAMB231-HS578t; MDAMB468-HS578t
O75915	2	2.37024	Hs 578T CTR	MDAMB231 CTR	PRA1 family protein 3	ARL6IP5	18.98	0.0025425	0.0071212	MDAMB231-HS578t; MDAMB468-HS578t
P05091	12	2.1156	MDAMB468 CTR	Hs 578T CTR	Aldehyde dehydrogenase_ mitochondrial	ALDH2	18.975	0.0025442	0.0071212	MDAMB231-HS578t; MDAMB468-HS578t
Q562R1	2	2.34225	Hs 578T CTR	MDAMB231 CTR	Beta-actin-like protein 2	ACTBL2	18.733	0.0026303	0.007344	MDAMB231-HS578t; MDAMB468-HS578t
P41091	20	1.64923	Hs 578T CTR	MDAMB231 CTR	Eukaryotic translation initiation factor 2 subunit 3	EIF2S3	18.586	0.0026843	0.0074535	MDAMB231-HS578t; MDAMB468-HS578t
Q8N9N8	3	2.05761	Hs 578T CTR	MDAMB468 CTR	Probable RNA-binding protein EIF1AD	EIF1AD	18.563	0.002693	0.0074635	MDAMB231-HS578t; MDAMB468-HS578t
P50993	15	1.65923	Hs 578T CTR	MDAMB468 CTR	Sodium/potassium-transporting ATPase subunit alpha-2	ATP1A2	18.471	0.0027276	0.0075503	MDAMB231-HS578t; MDAMB468-HS578t
P52907	12	1.99218	Hs 578T CTR	MDAMB231 CTR	F-actin-capping protein subunit alpha-1	CAPZA1	18.357	0.0027717	0.0076349	MDAMB231-HS578t; MDAMB468-HS578t
P19525	5	1.74578	Hs 578T CTR	MDAMB468 CTR	Interferon-induced_ double-stranded RNA-activated protein kinase	EIF2AK2	18.096	0.002876	0.007836	MDAMB231-HS578t; MDAMB468-HS578t
Q96PU8	3	1.69001	Hs 578T CTR	MDAMB468 CTR	Protein quaking	QKI	18.042	0.0028981	0.0078584	MDAMB231-HS578t; MDAMB468-HS578t
P49755	11	1.95421	Hs 578T CTR	MDAMB231 CTR	Transmembrane emp24 domain-containing protein 10	TMED10	17.984	0.0029223	0.007886	MDAMB231-HS578t; MDAMB468-HS578t
P25786	12	1.30547	MDAMB231 CTR	Hs 578T CTR	Proteasome subunit alpha type-1	PSMA1	17.874	0.0029687	0.0079825	MDAMB231-HS578t; MDAMB468-HS578t
P30050	8	1.83269	Hs 578T CTR	MDAMB231 CTR	60S ribosomal protein L12	RPL12	17.822	0.0029907	0.0080321	MDAMB231-HS578t; MDAMB468-HS578t
P27797	25	1.89327	Hs 578T CTR	MDAMB468 CTR	Calreticulin	CALR	17.786	0.0030065	0.0080649	MDAMB231-HS578t; MDAMB468-HS578t
P20674	10	2.34809	MDAMB468 CTR	Hs 578T CTR	Cytochrome c oxidase subunit 5A_ mitochondrial	COX5A	17.715	0.0030373	0.0081187	MDAMB231-HS578t; MDAMB468-HS578t
Q9P015	2	2.69748	MDAMB231 CTR	Hs 578T CTR	39S ribosomal protein L15_ mitochondrial	MRPL15	17.684	0.0030513	0.0081417	MDAMB231-HS578t; MDAMB468-HS578t
Q01650	6	1.55054	Hs 578T CTR	MDAMB468 CTR	Large neutral amino acids transporter small subunit 1	SLC7A5	17.67	0.0030575	0.0081437	MDAMB231-HS578t; MDAMB468-HS578t
O15143	13	1.53706	Hs 578T CTR	MDAMB231 CTR	Actin-related protein 2/3 complex subunit 1B	ARPC1B	17.554	0.0031094	0.0082236	MDAMB231-HS578t; MDAMB468-HS578t
Q9NX31	2	2.33693	Hs 578T CTR	MDAMB231 CTR	Oxidative stress-responsive serine-rich protein 1	OSER1	17.528	0.0031213	0.0082456	MDAMB231-HS578t; MDAMB468-HS578t
Q9UHX1	18	1.37262	Hs 578T CTR	MDAMB231 CTR	Poly(U)-binding-splicing factor PUF60	PUF60	17.419	0.0031713	0.0083459	MDAMB231-HS578t; MDAMB468-HS578t
O00505	6	3.09753	Hs 578T CTR	MDAMB468 CTR	Importin subunit alpha-4	KPNA3	17.413	0.0031741	0.0083459	MDAMB231-HS578t; MDAMB468-HS578t
P61803	1	2.22973	Hs 578T CTR	MDAMB231 CTR	Dolichyl-diphosphooligosaccharide--protein glycosyltransferase subunit DAD1	DAD1	17.366	0.0031964	0.008385	MDAMB231-HS578t; MDAMB468-HS578t
P07339	15	2.09799	Hs 578T CTR	MDAMB468 CTR	Cathepsin D	CTSD	17.307	0.0032242	0.0084186	MDAMB231-HS578t; MDAMB468-HS578t
P36404	1	1.90489	MDAMB468 CTR	Hs 578T CTR	ADP-ribosylation factor-like protein 2	ARL2	17.111	0.0033195	0.0086177	MDAMB231-HS578t; MDAMB468-HS578t
Q2M2I5	5	1.88364	Hs 578T CTR	MDAMB468 CTR	Keratin_ type I cytoskeletal 24	KRT24	17.057	0.0033463	0.0086524	MDAMB231-HS578t; MDAMB468-HS578t
Q9P1Z9	4	2.10229	Hs 578T CTR	MDAMB231 CTR	Coiled-coil domain-containing protein 180	CCDC180	17.053	0.0033482	0.0086524	MDAMB231-HS578t; MDAMB468-HS578t
Q9Y2Y8	1	2.04886	Hs 578T CTR	MDAMB231 CTR	Proteoglycan 3	PRG3	17.024	0.003363	0.0086708	MDAMB231-HS578t; MDAMB468-HS578t
Q71U36	5	1.91191	Hs 578T CTR	MDAMB231 CTR	Tubulin alpha-1A chain	TUBA1A	16.999	0.0033755	0.008693	MDAMB231-HS578t; MDAMB468-HS578t
Q8WUF5	3	5.47097	MDAMB231 CTR	Hs 578T CTR	RelA-associated inhibitor	PPP1R13L	16.969	0.0033907	0.0087222	MDAMB231-HS578t; MDAMB468-HS578t
Q9Y305	6	1.73571	Hs 578T CTR	MDAMB468 CTR	Acyl-coenzyme A thioesterase 9_ mitochondrial	ACOT9	16.959	0.0033958	0.0087253	MDAMB231-HS578t; MDAMB468-HS578t
P51114	7	1.24399	MDAMB231 CTR	Hs 578T CTR	Fragile X mental retardation syndrome-related protein 1	FXR1	16.743	0.0035087	0.0090053	MDAMB231-HS578t; MDAMB468-HS578t
P13535	13	1.74632	Hs 578T CTR	MDAMB231 CTR	Myosin-8	MYH8	16.625	0.0035721	0.0091026	MDAMB231-HS578t; MDAMB468-HS578t
Q8TCT9	5	1.64016	Hs 578T CTR	MDAMB468 CTR	Minor histocompatibility antigen H13	HM13	16.611	0.0035797	0.0091047	MDAMB231-HS578t; MDAMB468-HS578t
Q92747	8	1.54033	MDAMB468 CTR	Hs 578T CTR	Actin-related protein 2/3 complex subunit 1A	ARPC1A	16.545	0.0036163	0.0091666	MDAMB231-HS578t; MDAMB468-HS578t
O14950	13	2.09076	Hs 578T CTR	MDAMB468 CTR	Myosin regulatory light chain 12B	MYL12B	16.488	0.0036481	0.0092266	MDAMB231-HS578t; MDAMB468-HS578t
O15260	7	1.82128	Hs 578T CTR	MDAMB231 CTR	Surfeit locus protein 4	SURF4	16.42	0.0036868	0.0092724	MDAMB231-HS578t; MDAMB468-HS578t
Q16836	9	1.72395	MDAMB468 CTR	Hs 578T CTR	Hydroxyacyl-coenzyme A dehydrogenase_ mitochondrial	HADH	16.322	0.003743	0.0093827	MDAMB231-HS578t; MDAMB468-HS578t
Q02750	2	7.0265	MDAMB468 CTR	Hs 578T CTR	Dual specificity mitogen-activated protein kinase kinase 1	MAP2K1	16.322	0.0037431	0.0093827	MDAMB231-HS578t; MDAMB468-HS578t
O60341	2	6.47717	MDAMB468 CTR	Hs 578T CTR	Lysine-specific histone demethylase 1A	KDM1A	16.251	0.0037847	0.0094659	MDAMB231-HS578t; MDAMB468-HS578t
P02545	62	1.63908	Hs 578T CTR	MDAMB231 CTR	Prelamin-A/C	LMNA	16.139	0.0038514	0.0096008	MDAMB231-HS578t; MDAMB468-HS578t
P49662	2	1.69442	Hs 578T CTR	MDAMB231 CTR	Caspase-4	CASP4	15.986	0.0039454	0.0098134	MDAMB231-HS578t; MDAMB468-HS578t
P35269	2	1.8268	MDAMB468 CTR	Hs 578T CTR	General transcription factor IIF subunit 1	GTF2F1	15.95	0.0039679	0.0098456	MDAMB231-HS578t; MDAMB468-HS578t
P67870	3	4.47372	MDAMB468 CTR	Hs 578T CTR	Casein kinase II subunit beta	CSNK2B	15.917	0.0039885	0.009877	MDAMB231-HS578t; MDAMB468-HS578t
Q99459	8	2.35998	Hs 578T CTR	MDAMB231 CTR	Cell division cycle 5-like protein	CDC5L	15.8	0.0040637	0.010027	MDAMB231-HS578t; MDAMB468-HS578t
Q9H488	7	1.33401	Hs 578T CTR	MDAMB468 CTR	GDP-fucose protein O-fucosyltransferase 1	POFUT1	15.788	0.0040713	0.010027	MDAMB231-HS578t; MDAMB468-HS578t
O15400	1	2.93849	MDAMB231 CTR	Hs 578T CTR	Syntaxin-7	STX7	15.614	0.0041863	0.010269	MDAMB231-HS578t; MDAMB468-HS578t
P49821	2	2.27408	Hs 578T CTR	MDAMB468 CTR	NADH dehydrogenase [ubiquinone] flavoprotein 1_ mitochondrial	NDUFV1	15.612	0.0041877	0.010269	MDAMB231-HS578t; MDAMB468-HS578t
Q9UGV2	1	2.53205	Hs 578T CTR	MDAMB231 CTR	Protein NDRG3	NDRG3	15.541	0.0042359	0.01036	MDAMB231-HS578t; MDAMB468-HS578t
Q6PEY2	4	1.9099	Hs 578T CTR	MDAMB231 CTR	Tubulin alpha-3E chain	TUBA3E	15.537	0.0042385	0.01036	MDAMB231-HS578t; MDAMB468-HS578t
Q9NSI5	1	1.86647	Hs 578T CTR	MDAMB468 CTR	Immunoglobulin superfamily member 5	IGSF5	15.527	0.0042455	0.01036	MDAMB231-HS578t; MDAMB468-HS578t
Q7L1Q6	10	4.0336	MDAMB468 CTR	Hs 578T CTR	Basic leucine zipper and W2 domain-containing protein 1	BZW1	15.526	0.0042461	0.01036	MDAMB231-HS578t; MDAMB468-HS578t
P45973	7	1.4839	Hs 578T CTR	MDAMB468 CTR	Chromobox protein homolog 5	CBX5	15.426	0.0043162	0.010482	MDAMB231-HS578t; MDAMB468-HS578t
Q9BYZ2	10	1.36827	Hs 578T CTR	MDAMB468 CTR	L-lactate dehydrogenase A-like 6B	LDHAL6B	15.398	0.0043356	0.010502	MDAMB231-HS578t; MDAMB468-HS578t
P12883	7	1.95829	Hs 578T CTR	MDAMB231 CTR	Myosin-7	MYH7	15.398	0.0043356	0.010502	MDAMB231-HS578t; MDAMB468-HS578t
P22695	5	1.30181	MDAMB231 CTR	Hs 578T CTR	Cytochrome b-c1 complex subunit 2_ mitochondrial	UQCRC2	15.271	0.0044269	0.010674	MDAMB231-HS578t; MDAMB468-HS578t
Q9HD45	4	1.42624	MDAMB468 CTR	Hs 578T CTR	Transmembrane 9 superfamily member 3	TM9SF3	15.212	0.00447	0.010728	MDAMB231-HS578t; MDAMB468-HS578t
Q9BQ67	3	3.04282	MDAMB231 CTR	Hs 578T CTR	Glutamate-rich WD repeat-containing protein 1	GRWD1	15.175	0.0044973	0.010762	MDAMB231-HS578t; MDAMB468-HS578t
Q9BVA1	10	1.75743	Hs 578T CTR	MDAMB231 CTR	Tubulin beta-2B chain	TUBB2B	15.152	0.0045144	0.010789	MDAMB231-HS578t; MDAMB468-HS578t
Q9UJX6	1	3.92871	MDAMB468 CTR	Hs 578T CTR	Anaphase-promoting complex subunit 2	ANAPC2	15.139	0.0045244	0.010801	MDAMB231-HS578t; MDAMB468-HS578t
P36871	18	1.49982	Hs 578T CTR	MDAMB468 CTR	Phosphoglucomutase-1	PGM1	15.082	0.0045672	0.01088	MDAMB231-HS578t; MDAMB468-HS578t
Q06210	25	2.07472	Hs 578T CTR	MDAMB231 CTR	Glutamine--fructose-6-phosphate aminotransferase [isomerizing] 1	GFPT1	14.998	0.0046314	0.010987	MDAMB231-HS578t; MDAMB468-HS578t
Q6PKG0	7	1.82676	MDAMB468 CTR	Hs 578T CTR	La-related protein 1	LARP1	14.939	0.0046774	0.011038	MDAMB231-HS578t; MDAMB468-HS578t
Q9Y3U8	4	1.50106	MDAMB468 CTR	Hs 578T CTR	60S ribosomal protein L36	RPL36	14.872	0.0047301	0.011151	MDAMB231-HS578t; MDAMB468-HS578t
P12109	9	4.10123	Hs 578T CTR	MDAMB468 CTR	Collagen alpha-1(VI) chain	COL6A1	14.722	0.0048513	0.011368	MDAMB231-HS578t; MDAMB468-HS578t
O43681	7	1.48462	Hs 578T CTR	MDAMB468 CTR	ATPase GET3	GET3	14.713	0.0048583	0.011368	MDAMB231-HS578t; MDAMB468-HS578t
Q9Y5J1	2	8.52545	MDAMB231 CTR	Hs 578T CTR	U3 small nucleolar RNA-associated protein 18 homolog	UTP18	14.709	0.0048616	0.011368	MDAMB231-HS578t; MDAMB468-HS578t
Q8NEU8	3	2.53248	Hs 578T CTR	MDAMB468 CTR	DCC-interacting protein 13-beta	APPL2	14.707	0.0048636	0.011368	MDAMB231-HS578t; MDAMB468-HS578t
Q9BZL1	1	4.90474	MDAMB468 CTR	Hs 578T CTR	Ubiquitin-like protein 5	UBL5	14.677	0.0048883	0.01138	MDAMB231-HS578t; MDAMB468-HS578t
Q15029	32	1.4391	Hs 578T CTR	MDAMB231 CTR	116 kDa U5 small nuclear ribonucleoprotein component	EFTUD2	14.671	0.0048928	0.01138	MDAMB231-HS578t; MDAMB468-HS578t
P30041	29	1.90136	Hs 578T CTR	MDAMB231 CTR	Peroxiredoxin-6	PRDX6	14.576	0.0049732	0.011543	MDAMB231-HS578t; MDAMB468-HS578t
P27694	9	1.5938	MDAMB231 CTR	Hs 578T CTR	Replication protein A 70 kDa DNA-binding subunit	RPA1	14.503	0.0050349	0.011638	MDAMB231-HS578t; MDAMB468-HS578t
P19784	5	1.71508	Hs 578T CTR	MDAMB468 CTR	Casein kinase II subunit alpha'	CSNK2A2	14.362	0.0051592	0.011848	MDAMB231-HS578t; MDAMB468-HS578t
P68104	35	1.63962	MDAMB468 CTR	Hs 578T CTR	Elongation factor 1-alpha 1	EEF1A1	14.354	0.0051661	0.011848	MDAMB231-HS578t; MDAMB468-HS578t
Q9H910	2	1.67003	Hs 578T CTR	MDAMB231 CTR	Jupiter microtubule associated homolog 2	JPT2	14.13	0.0053716	0.012196	MDAMB231-HS578t; MDAMB468-HS578t
Q9Y2X3	21	1.73477	Hs 578T CTR	MDAMB231 CTR	Nucleolar protein 58	NOP58	14.046	0.005451	0.012359	MDAMB231-HS578t; MDAMB468-HS578t
P12882	5	5.65101	Hs 578T CTR	MDAMB468 CTR	Myosin-1	MYH1	1243.9	1.3927e-08	1.6641e-05	MDAMB231-HS578t; MDAMB468-HS578t; MDAMB468-MDAMB231
P04792	15	11.188	Hs 578T CTR	MDAMB231 CTR	Heat shock protein beta-1	HSPB1	1220.2	1.4753e-08	1.6641e-05	MDAMB231-HS578t; MDAMB468-HS578t; MDAMB468-MDAMB231
P31150	20	1.91301	Hs 578T CTR	MDAMB468 CTR	Rab GDP dissociation inhibitor alpha	GDI1	994.79	2.718e-08	2.044e-05	MDAMB231-HS578t; MDAMB468-HS578t; MDAMB468-MDAMB231
Q86Y46	6	1.82325	Hs 578T CTR	MDAMB468 CTR	Keratin_ type II cytoskeletal 73	KRT73	843.73	4.4476e-08	2.1213e-05	MDAMB231-HS578t; MDAMB468-HS578t; MDAMB468-MDAMB231
Q13885	4	7.98914	Hs 578T CTR	MDAMB468 CTR	Tubulin beta-2A chain	TUBB2A	779.2	5.6418e-08	2.1213e-05	MDAMB231-HS578t; MDAMB468-HS578t; MDAMB468-MDAMB231
P31947	15	7.58232	MDAMB468 CTR	Hs 578T CTR	14-3-3 protein sigma	SFN	636.67	1.0316e-07	3.3246e-05	MDAMB231-HS578t; MDAMB468-HS578t; MDAMB468-MDAMB231
Q15102	5	2.61946	MDAMB468 CTR	Hs 578T CTR	Platelet-activating factor acetylhydrolase IB subunit alpha1	PAFAH1B3	533.75	1.746e-07	4.9237e-05	MDAMB231-HS578t; MDAMB468-HS578t; MDAMB468-MDAMB231
Q9H0C2	1	7.44205	MDAMB468 CTR	MDAMB231 CTR	ADP/ATP translocase 4	SLC25A31	447.59	2.9513e-07	6.6581e-05	MDAMB231-HS578t; MDAMB468-HS578t; MDAMB468-MDAMB231
P54687	2	5.06319	Hs 578T CTR	MDAMB468 CTR	Branched-chain-amino-acid aminotransferase_ cytosolic	BCAT1	395.31	4.2726e-07	8.0578e-05	MDAMB231-HS578t; MDAMB468-HS578t; MDAMB468-MDAMB231
P04040	11	3.03596	MDAMB468 CTR	MDAMB231 CTR	Catalase	CAT	367.29	5.3178e-07	8.0578e-05	MDAMB231-HS578t; MDAMB468-HS578t; MDAMB468-MDAMB231
Q00059	6	1.92671	MDAMB231 CTR	Hs 578T CTR	Transcription factor A_ mitochondrial	TFAM	357.84	5.7469e-07	8.0578e-05	MDAMB231-HS578t; MDAMB468-HS578t; MDAMB468-MDAMB231
P31350	5	2.41634	MDAMB468 CTR	Hs 578T CTR	Ribonucleoside-diphosphate reductase subunit M2	RRM2	353.74	5.947e-07	8.0578e-05	MDAMB231-HS578t; MDAMB468-HS578t; MDAMB468-MDAMB231
Q16555	19	6.46353	Hs 578T CTR	MDAMB468 CTR	Dihydropyrimidinase-related protein 2	DPYSL2	351.28	6.0719e-07	8.0578e-05	MDAMB231-HS578t; MDAMB468-HS578t; MDAMB468-MDAMB231
P05109	3	11.2579	MDAMB468 CTR	MDAMB231 CTR	Protein S100-A8	S100A8	343.9	6.4679e-07	8.1064e-05	MDAMB231-HS578t; MDAMB468-HS578t; MDAMB468-MDAMB231
Q96IG2	1	53.0968	Hs 578T CTR	MDAMB468 CTR	F-box/LRR-repeat protein 20	FBXL20	336.24	6.9159e-07	8.2118e-05	MDAMB231-HS578t; MDAMB468-HS578t; MDAMB468-MDAMB231
P08727	52	6.85887	MDAMB468 CTR	Hs 578T CTR	Keratin_ type I cytoskeletal 19	KRT19	316.53	8.2763e-07	8.3173e-05	MDAMB231-HS578t; MDAMB468-HS578t; MDAMB468-MDAMB231
P08729	35	15.8176	MDAMB468 CTR	Hs 578T CTR	Keratin_ type II cytoskeletal 7	KRT7	314.39	8.4447e-07	8.3173e-05	MDAMB231-HS578t; MDAMB468-HS578t; MDAMB468-MDAMB231
P15121	18	4.33459	Hs 578T CTR	MDAMB231 CTR	Aldo-keto reductase family 1 member B1	AKR1B1	293.39	1.0369e-06	9.5104e-05	MDAMB231-HS578t; MDAMB468-HS578t; MDAMB468-MDAMB231
Q9Y6H1	3	5.55107	MDAMB468 CTR	Hs 578T CTR	Coiled-coil-helix-coiled-coil-helix domain-containing protein 2	CHCHD2	268.25	1.3529e-06	0.00011227	MDAMB231-HS578t; MDAMB468-HS578t; MDAMB468-MDAMB231
P31944	12	15.1966	MDAMB468 CTR	Hs 578T CTR	Caspase-14	CASP14	265.6	1.3934e-06	0.00011227	MDAMB231-HS578t; MDAMB468-HS578t; MDAMB468-MDAMB231
P15559	11	25.0676	Hs 578T CTR	MDAMB231 CTR	NAD(P)H dehydrogenase [quinone] 1	NQO1	256.38	1.5472e-06	0.00012036	MDAMB231-HS578t; MDAMB468-HS578t; MDAMB468-MDAMB231
O75439	3	1.77568	MDAMB468 CTR	Hs 578T CTR	Mitochondrial-processing peptidase subunit beta	PMPCB	245.76	1.7541e-06	0.00012366	MDAMB231-HS578t; MDAMB468-HS578t; MDAMB468-MDAMB231
Q99622	2	3.91949	MDAMB468 CTR	MDAMB231 CTR	Protein C10	C12orf57	238.44	1.9184e-06	0.00012729	MDAMB231-HS578t; MDAMB468-HS578t; MDAMB468-MDAMB231
Q96CW1	11	3.61074	Hs 578T CTR	MDAMB468 CTR	AP-2 complex subunit mu	AP2M1	235.9	1.9802e-06	0.0001275	MDAMB231-HS578t; MDAMB468-HS578t; MDAMB468-MDAMB231
Q13263	21	2.57486	MDAMB468 CTR	Hs 578T CTR	Transcription intermediary factor 1-beta	TRIM28	228.93	2.164e-06	0.00013195	MDAMB231-HS578t; MDAMB468-HS578t; MDAMB468-MDAMB231
P13647	28	6.00293	MDAMB468 CTR	MDAMB231 CTR	Keratin_ type II cytoskeletal 5	KRT5	218.5	2.4845e-06	0.0001396	MDAMB231-HS578t; MDAMB468-HS578t; MDAMB468-MDAMB231
Q02809	9	4.55192	Hs 578T CTR	MDAMB468 CTR	Procollagen-lysine_2-oxoglutarate 5-dioxygenase 1	PLOD1	217.83	2.507e-06	0.0001396	MDAMB231-HS578t; MDAMB468-HS578t; MDAMB468-MDAMB231
P05787	45	7.47013	MDAMB468 CTR	Hs 578T CTR	Keratin_ type II cytoskeletal 8	KRT8	215.21	2.5985e-06	0.0001396	MDAMB231-HS578t; MDAMB468-HS578t; MDAMB468-MDAMB231
Q03135	8	5.16577	Hs 578T CTR	MDAMB468 CTR	Caveolin-1	CAV1	212.96	2.6807e-06	0.0001396	MDAMB231-HS578t; MDAMB468-HS578t; MDAMB468-MDAMB231
A0A1W2PP97	1	30.4298	MDAMB231 CTR	Hs 578T CTR	Thrombospondin type-1 domain-containing protein 8	THSD8	210.74	2.7652e-06	0.0001396	MDAMB231-HS578t; MDAMB468-HS578t; MDAMB468-MDAMB231
Q9NP08	3	8.67764	Hs 578T CTR	MDAMB468 CTR	Homeobox protein HMX1	HMX1	209.54	2.812e-06	0.0001396	MDAMB231-HS578t; MDAMB468-HS578t; MDAMB468-MDAMB231
Q99536	12	3.80473	Hs 578T CTR	MDAMB468 CTR	Synaptic vesicle membrane protein VAT-1 homolog	VAT1	206.17	2.9504e-06	0.0001396	MDAMB231-HS578t; MDAMB468-HS578t; MDAMB468-MDAMB231
Q03113	1	188.75	Hs 578T CTR	MDAMB231 CTR	Guanine nucleotide-binding protein subunit alpha-12	GNA12	206.01	2.9572e-06	0.0001396	MDAMB231-HS578t; MDAMB468-HS578t; MDAMB468-MDAMB231
O00264	4	6.25989	MDAMB468 CTR	MDAMB231 CTR	Membrane-associated progesterone receptor component 1	PGRMC1	202.78	3.0986e-06	0.0001396	MDAMB231-HS578t; MDAMB468-HS578t; MDAMB468-MDAMB231
P21589	18	8.18798	MDAMB231 CTR	Hs 578T CTR	5'-nucleotidase	NT5E	201.68	3.1489e-06	0.0001396	MDAMB231-HS578t; MDAMB468-HS578t; MDAMB468-MDAMB231
Q92888	5	9.88001	MDAMB468 CTR	Hs 578T CTR	Rho guanine nucleotide exchange factor 1	ARHGEF1	201.05	3.1778e-06	0.0001396	MDAMB231-HS578t; MDAMB468-HS578t; MDAMB468-MDAMB231
Q5T2Q4	1	11.5758	Hs 578T CTR	MDAMB468 CTR	Cyclin-Y-like protein 2	CCNYL2	200.13	3.2216e-06	0.0001396	MDAMB231-HS578t; MDAMB468-HS578t; MDAMB468-MDAMB231
Q14914	5	13.5783	Hs 578T CTR	MDAMB468 CTR	Prostaglandin reductase 1	PTGR1	196.44	3.4033e-06	0.0001396	MDAMB231-HS578t; MDAMB468-HS578t; MDAMB468-MDAMB231
P60033	2	6.07244	Hs 578T CTR	MDAMB468 CTR	CD81 antigen	CD81	188.68	3.8336e-06	0.00015081	MDAMB231-HS578t; MDAMB468-HS578t; MDAMB468-MDAMB231
P00533	35	5.1771	MDAMB468 CTR	Hs 578T CTR	Epidermal growth factor receptor	EGFR	188.6	3.8389e-06	0.00015081	MDAMB231-HS578t; MDAMB468-HS578t; MDAMB468-MDAMB231
Q10589	1	8.66777	MDAMB231 CTR	MDAMB468 CTR	Bone marrow stromal antigen 2	BST2	187.82	3.8859e-06	0.00015081	MDAMB231-HS578t; MDAMB468-HS578t; MDAMB468-MDAMB231
O14745	7	2.62423	MDAMB468 CTR	MDAMB231 CTR	Na(+)/H(+) exchange regulatory cofactor NHE-RF1	SLC9A3R1	186.88	3.944e-06	0.00015081	MDAMB231-HS578t; MDAMB468-HS578t; MDAMB468-MDAMB231
Q9BYD3	3	57.333	MDAMB468 CTR	Hs 578T CTR	39S ribosomal protein L4_ mitochondrial	MRPL4	181.01	4.3335e-06	0.0001608	MDAMB231-HS578t; MDAMB468-HS578t; MDAMB468-MDAMB231
P19404	4	4.68497	MDAMB468 CTR	MDAMB231 CTR	NADH dehydrogenase [ubiquinone] flavoprotein 2_ mitochondrial	NDUFV2	180.81	4.348e-06	0.0001608	MDAMB231-HS578t; MDAMB468-HS578t; MDAMB468-MDAMB231
P26006	12	4.82261	MDAMB231 CTR	MDAMB468 CTR	Integrin alpha-3	ITGA3	171.65	5.0679e-06	0.00018025	MDAMB231-HS578t; MDAMB468-HS578t; MDAMB468-MDAMB231
Q969G5	4	15.8494	Hs 578T CTR	MDAMB468 CTR	Caveolae-associated protein 3	CAVIN3	170.24	5.1933e-06	0.00018025	MDAMB231-HS578t; MDAMB468-HS578t; MDAMB468-MDAMB231
O60664	26	2.38805	Hs 578T CTR	MDAMB468 CTR	Perilipin-3	PLIN3	166.59	5.5355e-06	0.00018922	MDAMB231-HS578t; MDAMB468-HS578t; MDAMB468-MDAMB231
P50479	1	6.05542	Hs 578T CTR	MDAMB468 CTR	PDZ and LIM domain protein 4	PDLIM4	161.91	6.0201e-06	0.0002026	MDAMB231-HS578t; MDAMB468-HS578t; MDAMB468-MDAMB231
P05783	37	11.5556	MDAMB468 CTR	Hs 578T CTR	Keratin_ type I cytoskeletal 18	KRT18	160.35	6.1945e-06	0.0002026	MDAMB231-HS578t; MDAMB468-HS578t; MDAMB468-MDAMB231
O60218	4	8.13116	MDAMB468 CTR	Hs 578T CTR	Aldo-keto reductase family 1 member B10	AKR1B10	159.81	6.2567e-06	0.0002026	MDAMB231-HS578t; MDAMB468-HS578t; MDAMB468-MDAMB231
Q9BSJ1	3	5.86459	Hs 578T CTR	MDAMB468 CTR	Tripartite motif-containing protein 51	TRIM51	159.55	6.2863e-06	0.0002026	MDAMB231-HS578t; MDAMB468-HS578t; MDAMB468-MDAMB231
Q6NZI2	16	4.59702	Hs 578T CTR	MDAMB468 CTR	Caveolae-associated protein 1	CAVIN1	157.88	6.4848e-06	0.00020605	MDAMB231-HS578t; MDAMB468-HS578t; MDAMB468-MDAMB231
P53367	4	3.11365	Hs 578T CTR	MDAMB468 CTR	Arfaptin-1	ARFIP1	153.98	6.9799e-06	0.00020996	MDAMB231-HS578t; MDAMB468-HS578t; MDAMB468-MDAMB231
P00966	17	17.1937	MDAMB468 CTR	MDAMB231 CTR	Argininosuccinate synthase	ASS1	149.72	7.5804e-06	0.0002173	MDAMB231-HS578t; MDAMB468-HS578t; MDAMB468-MDAMB231
Q96AC1	22	2.0818	Hs 578T CTR	MDAMB468 CTR	Fermitin family homolog 2	FERMT2	149.12	7.6698e-06	0.0002173	MDAMB231-HS578t; MDAMB468-HS578t; MDAMB468-MDAMB231
O43760	1	4.55653	MDAMB231 CTR	Hs 578T CTR	Synaptogyrin-2	SYNGR2	148.88	7.7058e-06	0.0002173	MDAMB231-HS578t; MDAMB468-HS578t; MDAMB468-MDAMB231
Q14376	5	3.48006	MDAMB468 CTR	Hs 578T CTR	UDP-glucose 4-epimerase	GALE	145.6	8.2285e-06	0.00022486	MDAMB231-HS578t; MDAMB468-HS578t; MDAMB468-MDAMB231
Q13233	2	2.75923	MDAMB231 CTR	Hs 578T CTR	Mitogen-activated protein kinase kinase kinase 1	MAP3K1	144.74	8.3725e-06	0.00022486	MDAMB231-HS578t; MDAMB468-HS578t; MDAMB468-MDAMB231
P10606	1	3.65176	MDAMB468 CTR	Hs 578T CTR	Cytochrome c oxidase subunit 5B_ mitochondrial	COX5B	142.38	8.7866e-06	0.00023049	MDAMB231-HS578t; MDAMB468-HS578t; MDAMB468-MDAMB231
O75874	16	4.52051	MDAMB468 CTR	MDAMB231 CTR	Isocitrate dehydrogenase [NADP] cytoplasmic	IDH1	141.05	9.0327e-06	0.00023358	MDAMB231-HS578t; MDAMB468-HS578t; MDAMB468-MDAMB231
Q8IWE2	9	2.2842	Hs 578T CTR	MDAMB468 CTR	Protein NOXP20	FAM114A1	139.27	9.3758e-06	0.00023358	MDAMB231-HS578t; MDAMB468-HS578t; MDAMB468-MDAMB231
O75475	3	4.22569	Hs 578T CTR	MDAMB231 CTR	PC4 and SFRS1-interacting protein	PSIP1	138.21	9.5893e-06	0.00023358	MDAMB231-HS578t; MDAMB468-HS578t; MDAMB468-MDAMB231
Q14166	8	1.95188	Hs 578T CTR	MDAMB231 CTR	Tubulin--tyrosine ligase-like protein 12	TTLL12	137.51	9.7326e-06	0.00023358	MDAMB231-HS578t; MDAMB468-HS578t; MDAMB468-MDAMB231
O75340	6	3.15126	Hs 578T CTR	MDAMB231 CTR	Programmed cell death protein 6	PDCD6	134.13	1.0471e-05	0.00023861	MDAMB231-HS578t; MDAMB468-HS578t; MDAMB468-MDAMB231
P09471	3	1.93529	MDAMB468 CTR	MDAMB231 CTR	Guanine nucleotide-binding protein G(o) subunit alpha	GNAO1	134.04	1.049e-05	0.00023861	MDAMB231-HS578t; MDAMB468-HS578t; MDAMB468-MDAMB231
Q00534	2	3.93174	Hs 578T CTR	MDAMB468 CTR	Cyclin-dependent kinase 6	CDK6	133.89	1.0525e-05	0.00023861	MDAMB231-HS578t; MDAMB468-HS578t; MDAMB468-MDAMB231
Q8NBJ5	13	2.28607	Hs 578T CTR	MDAMB231 CTR	Procollagen galactosyltransferase 1	COLGALT1	133.09	1.0713e-05	0.00023861	MDAMB231-HS578t; MDAMB468-HS578t; MDAMB468-MDAMB231
Q9UNZ2	12	2.333	Hs 578T CTR	MDAMB231 CTR	NSFL1 cofactor p47	NSFL1C	132.73	1.0797e-05	0.00023861	MDAMB231-HS578t; MDAMB468-HS578t; MDAMB468-MDAMB231
Q9Y2Z0	15	1.76686	Hs 578T CTR	MDAMB231 CTR	Protein SGT1 homolog	SUGT1	131.59	1.1074e-05	0.00024021	MDAMB231-HS578t; MDAMB468-HS578t; MDAMB468-MDAMB231
Q13409	11	4.39623	Hs 578T CTR	MDAMB468 CTR	Cytoplasmic dynein 1 intermediate chain 2	DYNC1I2	130.62	1.1319e-05	0.00024259	MDAMB231-HS578t; MDAMB468-HS578t; MDAMB468-MDAMB231
Q07960	11	2.13188	Hs 578T CTR	MDAMB231 CTR	Rho GTPase-activating protein 1	ARHGAP1	129.24	1.1675e-05	0.00024259	MDAMB231-HS578t; MDAMB468-HS578t; MDAMB468-MDAMB231
Q04828	18	3.00549	MDAMB468 CTR	MDAMB231 CTR	Aldo-keto reductase family 1 member C1	AKR1C1	128.67	1.1828e-05	0.00024259	MDAMB231-HS578t; MDAMB468-HS578t; MDAMB468-MDAMB231
Q86YS6	2	14.0912	Hs 578T CTR	MDAMB468 CTR	Ras-related protein Rab-43	RAB43	123.25	1.3419e-05	0.00027063	MDAMB231-HS578t; MDAMB468-HS578t; MDAMB468-MDAMB231
Q8IXM2	5	3.23545	MDAMB231 CTR	Hs 578T CTR	Chromatin complexes subunit BAP18	BAP18	122.67	1.3604e-05	0.00027161	MDAMB231-HS578t; MDAMB468-HS578t; MDAMB468-MDAMB231
Q07817	1	4.43999	Hs 578T CTR	MDAMB468 CTR	Bcl-2-like protein 1	BCL2L1	121.8	1.389e-05	0.00027224	MDAMB231-HS578t; MDAMB468-HS578t; MDAMB468-MDAMB231
Q15942	12	5.45105	Hs 578T CTR	MDAMB468 CTR	Zyxin	ZYX	119.63	1.464e-05	0.00027989	MDAMB231-HS578t; MDAMB468-HS578t; MDAMB468-MDAMB231
O60701	15	6.63944	Hs 578T CTR	MDAMB468 CTR	UDP-glucose 6-dehydrogenase	UGDH	117.42	1.546e-05	0.0002931	MDAMB231-HS578t; MDAMB468-HS578t; MDAMB468-MDAMB231
Q14195	14	20.4098	Hs 578T CTR	MDAMB468 CTR	Dihydropyrimidinase-related protein 3	DPYSL3	116.76	1.5721e-05	0.00029555	MDAMB231-HS578t; MDAMB468-HS578t; MDAMB468-MDAMB231
Q9UJZ1	14	3.26234	MDAMB468 CTR	Hs 578T CTR	Stomatin-like protein 2_ mitochondrial	STOML2	113.59	1.7036e-05	0.00031483	MDAMB231-HS578t; MDAMB468-HS578t; MDAMB468-MDAMB231
O43852	11	4.2239	Hs 578T CTR	MDAMB468 CTR	Calumenin	CALU	113.3	1.7165e-05	0.00031483	MDAMB231-HS578t; MDAMB468-HS578t; MDAMB468-MDAMB231
P07686	2	21.9168	Hs 578T CTR	MDAMB468 CTR	Beta-hexosaminidase subunit beta	HEXB	110.79	1.8328e-05	0.00033345	MDAMB231-HS578t; MDAMB468-HS578t; MDAMB468-MDAMB231
P35221	17	7.19303	Hs 578T CTR	MDAMB468 CTR	Catenin alpha-1	CTNNA1	109.14	1.9146e-05	0.00034281	MDAMB231-HS578t; MDAMB468-HS578t; MDAMB468-MDAMB231
Q969H8	5	2.99309	Hs 578T CTR	MDAMB468 CTR	Myeloid-derived growth factor	MYDGF	105.61	2.1075e-05	0.00036856	MDAMB231-HS578t; MDAMB468-HS578t; MDAMB468-MDAMB231
Q96AE4	24	2.40994	MDAMB468 CTR	MDAMB231 CTR	Far upstream element-binding protein 1	FUBP1	105.18	2.1328e-05	0.00037012	MDAMB231-HS578t; MDAMB468-HS578t; MDAMB468-MDAMB231
Q149M9	2	2.52095	Hs 578T CTR	MDAMB231 CTR	NACHT domain- and WD repeat-containing protein 1	NWD1	102	2.3325e-05	0.00039344	MDAMB231-HS578t; MDAMB468-HS578t; MDAMB468-MDAMB231
P23141	1	5.47692	Hs 578T CTR	MDAMB468 CTR	Liver carboxylesterase 1	CES1	101	2.4e-05	0.00040012	MDAMB231-HS578t; MDAMB468-HS578t; MDAMB468-MDAMB231
O95817	6	3.92995	Hs 578T CTR	MDAMB468 CTR	BAG family molecular chaperone regulator 3	BAG3	99.198	2.5295e-05	0.00041055	MDAMB231-HS578t; MDAMB468-HS578t; MDAMB468-MDAMB231
P07384	19	3.56018	MDAMB468 CTR	MDAMB231 CTR	Calpain-1 catalytic subunit	CAPN1	97.658	2.6474e-05	0.0004223	MDAMB231-HS578t; MDAMB468-HS578t; MDAMB468-MDAMB231
Q01518	35	2.50635	Hs 578T CTR	MDAMB231 CTR	Adenylyl cyclase-associated protein 1	CAP1	97.523	2.6581e-05	0.0004223	MDAMB231-HS578t; MDAMB468-HS578t; MDAMB468-MDAMB231
Q92734	7	1.60852	Hs 578T CTR	MDAMB231 CTR	Protein TFG	TFG	96.503	2.7406e-05	0.00042937	MDAMB231-HS578t; MDAMB468-HS578t; MDAMB468-MDAMB231
Q9UI30	2	2.97198	MDAMB468 CTR	Hs 578T CTR	Multifunctional methyltransferase subunit TRM112-like protein	TRMT112	95.863	2.7942e-05	0.00043127	MDAMB231-HS578t; MDAMB468-HS578t; MDAMB468-MDAMB231
P12532	8	5.7759	MDAMB468 CTR	Hs 578T CTR	Creatine kinase U-type_ mitochondrial	CKMT1A	95.514	2.824e-05	0.00043127	MDAMB231-HS578t; MDAMB468-HS578t; MDAMB468-MDAMB231
O95563	2	37.6684	MDAMB468 CTR	Hs 578T CTR	Mitochondrial pyruvate carrier 2	MPC2	94.525	2.9109e-05	0.00043779	MDAMB231-HS578t; MDAMB468-HS578t; MDAMB468-MDAMB231
P84090	5	2.17565	MDAMB468 CTR	Hs 578T CTR	Enhancer of rudimentary homolog	ERH	93.928	2.9649e-05	0.00044297	MDAMB231-HS578t; MDAMB468-HS578t; MDAMB468-MDAMB231
Q96C45	1	11.6369	Hs 578T CTR	MDAMB468 CTR	Serine/threonine-protein kinase ULK4	ULK4	92.193	3.1301e-05	0.00045683	MDAMB231-HS578t; MDAMB468-HS578t; MDAMB468-MDAMB231
P27482	1	4.87	MDAMB468 CTR	Hs 578T CTR	Calmodulin-like protein 3	CALML3	92.169	3.1324e-05	0.00045683	MDAMB231-HS578t; MDAMB468-HS578t; MDAMB468-MDAMB231
P08670	95	6.69491	Hs 578T CTR	MDAMB468 CTR	Vimentin	VIM	91.307	3.219e-05	0.00046552	MDAMB231-HS578t; MDAMB468-HS578t; MDAMB468-MDAMB231
P48960	12	2.58953	MDAMB231 CTR	Hs 578T CTR	Adhesion G protein-coupled receptor E5	ADGRE5	91.026	3.248e-05	0.00046672	MDAMB231-HS578t; MDAMB468-HS578t; MDAMB468-MDAMB231
P52209	20	2.51498	MDAMB468 CTR	Hs 578T CTR	6-phosphogluconate dehydrogenase_ decarboxylating	PGD	89.753	3.3836e-05	0.00047582	MDAMB231-HS578t; MDAMB468-HS578t; MDAMB468-MDAMB231
O15067	15	1.4563	MDAMB231 CTR	MDAMB468 CTR	Phosphoribosylformylglycinamidine synthase	PFAS	89.238	3.4405e-05	0.00047619	MDAMB231-HS578t; MDAMB468-HS578t; MDAMB468-MDAMB231
Q8WUP2	1	8.9579	Hs 578T CTR	MDAMB231 CTR	Filamin-binding LIM protein 1	FBLIM1	88.884	3.4805e-05	0.00047698	MDAMB231-HS578t; MDAMB468-HS578t; MDAMB468-MDAMB231
O00764	7	4.65746	MDAMB468 CTR	MDAMB231 CTR	Pyridoxal kinase	PDXK	88.74	3.4969e-05	0.00047698	MDAMB231-HS578t; MDAMB468-HS578t; MDAMB468-MDAMB231
Q15836	2	3.39874	Hs 578T CTR	MDAMB468 CTR	Vesicle-associated membrane protein 3	VAMP3	88.354	3.5415e-05	0.00047698	MDAMB231-HS578t; MDAMB468-HS578t; MDAMB468-MDAMB231
Q9NSB4	5	3.24526	Hs 578T CTR	MDAMB468 CTR	Keratin_ type II cuticular Hb2	KRT82	88.018	3.5809e-05	0.00047729	MDAMB231-HS578t; MDAMB468-HS578t; MDAMB468-MDAMB231
P24844	3	63.0467	Hs 578T CTR	MDAMB468 CTR	Myosin regulatory light polypeptide 9	MYL9	87.42	3.6523e-05	0.00048061	MDAMB231-HS578t; MDAMB468-HS578t; MDAMB468-MDAMB231
P16401	3	133.522	MDAMB468 CTR	Hs 578T CTR	Histone H1.5	H1-5	87.148	3.6855e-05	0.00048061	MDAMB231-HS578t; MDAMB468-HS578t; MDAMB468-MDAMB231
P11166	10	1.80874	MDAMB231 CTR	Hs 578T CTR	Solute carrier family 2_ facilitated glucose transporter member 1	SLC2A1	86.337	3.7867e-05	0.00049052	MDAMB231-HS578t; MDAMB468-HS578t; MDAMB468-MDAMB231
P08174	7	3.07484	MDAMB231 CTR	MDAMB468 CTR	Complement decay-accelerating factor	CD55	86.194	3.805e-05	0.00049052	MDAMB231-HS578t; MDAMB468-HS578t; MDAMB468-MDAMB231
Q96DG6	4	6.07168	Hs 578T CTR	MDAMB468 CTR	Carboxymethylenebutenolidase homolog	CMBL	85.233	3.9307e-05	0.00049631	MDAMB231-HS578t; MDAMB468-HS578t; MDAMB468-MDAMB231
Q16762	3	7.43564	MDAMB468 CTR	Hs 578T CTR	Thiosulfate sulfurtransferase	TST	84.052	4.0928e-05	0.00050733	MDAMB231-HS578t; MDAMB468-HS578t; MDAMB468-MDAMB231
Q9BXN6	3	7.33245	MDAMB231 CTR	Hs 578T CTR	Sperm protein associated with the nucleus on the X chromosome D	SPANXD	82.727	4.2856e-05	0.00052545	MDAMB231-HS578t; MDAMB468-HS578t; MDAMB468-MDAMB231
Q05952	1	4.82871	Hs 578T CTR	MDAMB468 CTR	Nuclear transition protein 2	TNP2	82.493	4.3208e-05	0.00052691	MDAMB231-HS578t; MDAMB468-HS578t; MDAMB468-MDAMB231
Q32P28	16	3.94244	Hs 578T CTR	MDAMB231 CTR	Prolyl 3-hydroxylase 1	P3H1	82.073	4.3852e-05	0.00053188	MDAMB231-HS578t; MDAMB468-HS578t; MDAMB468-MDAMB231
Q14258	6	3.62775	Hs 578T CTR	MDAMB468 CTR	E3 ubiquitin/ISG15 ligase TRIM25	TRIM25	81.487	4.4771e-05	0.00053512	MDAMB231-HS578t; MDAMB468-HS578t; MDAMB468-MDAMB231
Q9HCY8	6	4.07044	MDAMB468 CTR	Hs 578T CTR	Protein S100-A14	S100A14	81.367	4.4961e-05	0.00053512	MDAMB231-HS578t; MDAMB468-HS578t; MDAMB468-MDAMB231
Q15293	11	2.97066	Hs 578T CTR	MDAMB231 CTR	Reticulocalbin-1	RCN1	81.335	4.5014e-05	0.00053512	MDAMB231-HS578t; MDAMB468-HS578t; MDAMB468-MDAMB231
Q00341	31	1.76996	Hs 578T CTR	MDAMB231 CTR	Vigilin	HDLBP	81.301	4.5068e-05	0.00053512	MDAMB231-HS578t; MDAMB468-HS578t; MDAMB468-MDAMB231
Q13541	2	6.33978	Hs 578T CTR	MDAMB468 CTR	Eukaryotic translation initiation factor 4E-binding protein 1	EIF4EBP1	81.121	4.5358e-05	0.00053575	MDAMB231-HS578t; MDAMB468-HS578t; MDAMB468-MDAMB231
P09382	19	7.20385	Hs 578T CTR	MDAMB468 CTR	Galectin-1	LGALS1	80.739	4.5981e-05	0.00053867	MDAMB231-HS578t; MDAMB468-HS578t; MDAMB468-MDAMB231
A2RU49	2	3.19544	Hs 578T CTR	MDAMB468 CTR	Hydroxylysine kinase	HYKK	76.433	5.3871e-05	0.00060767	MDAMB231-HS578t; MDAMB468-HS578t; MDAMB468-MDAMB231
Q9HCD6	5	3.57558	Hs 578T CTR	MDAMB468 CTR	Protein TANC2	TANC2	76.246	5.4253e-05	0.00060893	MDAMB231-HS578t; MDAMB468-HS578t; MDAMB468-MDAMB231
Q13435	27	1.69178	MDAMB468 CTR	MDAMB231 CTR	Splicing factor 3B subunit 2	SF3B2	74.165	5.8764e-05	0.00064669	MDAMB231-HS578t; MDAMB468-HS578t; MDAMB468-MDAMB231
Q96AX2	2	6.56182	Hs 578T CTR	MDAMB468 CTR	Ras-related protein Rab-37	RAB37	73.766	5.9683e-05	0.00065046	MDAMB231-HS578t; MDAMB468-HS578t; MDAMB468-MDAMB231
O00217	3	2.61827	MDAMB468 CTR	Hs 578T CTR	NADH dehydrogenase [ubiquinone] iron-sulfur protein 8_ mitochondrial	NDUFS8	73.121	6.1215e-05	0.0006545	MDAMB231-HS578t; MDAMB468-HS578t; MDAMB468-MDAMB231
P30622	2	3.92213	Hs 578T CTR	MDAMB468 CTR	CAP-Gly domain-containing linker protein 1	CLIP1	72.961	6.1602e-05	0.00065532	MDAMB231-HS578t; MDAMB468-HS578t; MDAMB468-MDAMB231
Q15645	1	10.8828	Hs 578T CTR	MDAMB231 CTR	Pachytene checkpoint protein 2 homolog	TRIP13	72.592	6.2508e-05	0.00065897	MDAMB231-HS578t; MDAMB468-HS578t; MDAMB468-MDAMB231
P51451	4	3.08649	MDAMB231 CTR	Hs 578T CTR	Tyrosine-protein kinase Blk	BLK	72.331	6.3161e-05	0.00066275	MDAMB231-HS578t; MDAMB468-HS578t; MDAMB468-MDAMB231
O60551	1	8.68127	Hs 578T CTR	MDAMB468 CTR	Glycylpeptide N-tetradecanoyltransferase 2	NMT2	71.921	6.4203e-05	0.00067056	MDAMB231-HS578t; MDAMB468-HS578t; MDAMB468-MDAMB231
Q13011	12	5.43972	MDAMB468 CTR	Hs 578T CTR	Delta(3_5)-Delta(2_4)-dienoyl-CoA isomerase_ mitochondrial	ECH1	70.623	6.7658e-05	0.00070017	MDAMB231-HS578t; MDAMB468-HS578t; MDAMB468-MDAMB231
Q8TEA8	2	8.11383	MDAMB231 CTR	Hs 578T CTR	D-aminoacyl-tRNA deacylase 1	DTD1	70.06	6.9234e-05	0.00070852	MDAMB231-HS578t; MDAMB468-HS578t; MDAMB468-MDAMB231
P13639	55	2.23734	Hs 578T CTR	MDAMB231 CTR	Elongation factor 2	EEF2	69.993	6.9425e-05	0.00070852	MDAMB231-HS578t; MDAMB468-HS578t; MDAMB468-MDAMB231
Q9NVA2	12	1.89249	Hs 578T CTR	MDAMB231 CTR	Septin-11	SEPTIN11	69.912	6.9658e-05	0.00070852	MDAMB231-HS578t; MDAMB468-HS578t; MDAMB468-MDAMB231
P07741	8	3.27727	MDAMB468 CTR	Hs 578T CTR	Adenine phosphoribosyltransferase	APRT	69.89	6.9721e-05	0.00070852	MDAMB231-HS578t; MDAMB468-HS578t; MDAMB468-MDAMB231
P48147	4	15.2771	MDAMB468 CTR	Hs 578T CTR	Prolyl endopeptidase	PREP	69.608	7.0535e-05	0.00071153	MDAMB231-HS578t; MDAMB468-HS578t; MDAMB468-MDAMB231
O43396	7	3.07795	Hs 578T CTR	MDAMB231 CTR	Thioredoxin-like protein 1	TXNL1	66.845	7.9242e-05	0.00077448	MDAMB231-HS578t; MDAMB468-HS578t; MDAMB468-MDAMB231
Q96G03	10	4.26227	MDAMB231 CTR	Hs 578T CTR	Phosphoglucomutase-2	PGM2	66.627	7.9989e-05	0.00077448	MDAMB231-HS578t; MDAMB468-HS578t; MDAMB468-MDAMB231
P07108	5	2.37177	MDAMB468 CTR	MDAMB231 CTR	Acyl-CoA-binding protein	DBI	63.756	9.076e-05	0.00085314	MDAMB231-HS578t; MDAMB468-HS578t; MDAMB468-MDAMB231
Q8WXF1	10	1.72125	MDAMB468 CTR	Hs 578T CTR	Paraspeckle component 1	PSPC1	63.504	9.1795e-05	0.00085542	MDAMB231-HS578t; MDAMB468-HS578t; MDAMB468-MDAMB231
Q9HC38	7	2.23963	MDAMB231 CTR	MDAMB468 CTR	Glyoxalase domain-containing protein 4	GLOD4	62.75	9.4988e-05	0.0008722	MDAMB231-HS578t; MDAMB468-HS578t; MDAMB468-MDAMB231
Q99567	6	2.03925	MDAMB468 CTR	Hs 578T CTR	Nuclear pore complex protein Nup88	NUP88	62.723	9.5106e-05	0.0008722	MDAMB231-HS578t; MDAMB468-HS578t; MDAMB468-MDAMB231
Q9Y5B9	31	1.75812	Hs 578T CTR	MDAMB468 CTR	FACT complex subunit SPT16	SUPT16H	61.19	0.00010208	0.00091753	MDAMB231-HS578t; MDAMB468-HS578t; MDAMB468-MDAMB231
P13928	4	10.8121	MDAMB468 CTR	MDAMB231 CTR	Annexin A8	ANXA8	60.973	0.00010313	0.00092197	MDAMB231-HS578t; MDAMB468-HS578t; MDAMB468-MDAMB231
Q9Y281	6	4.12854	Hs 578T CTR	MDAMB468 CTR	Cofilin-2	CFL2	60.918	0.00010339	0.00092197	MDAMB231-HS578t; MDAMB468-HS578t; MDAMB468-MDAMB231
O60684	15	1.51926	MDAMB468 CTR	Hs 578T CTR	Importin subunit alpha-7	KPNA6	60.591	0.000105	0.00093216	MDAMB231-HS578t; MDAMB468-HS578t; MDAMB468-MDAMB231
P51809	1	8.08968	MDAMB468 CTR	MDAMB231 CTR	Vesicle-associated membrane protein 7	VAMP7	60.517	0.00010536	0.00093216	MDAMB231-HS578t; MDAMB468-HS578t; MDAMB468-MDAMB231
Q15181	15	3.01974	MDAMB468 CTR	Hs 578T CTR	Inorganic pyrophosphatase	PPA1	60.018	0.00010789	0.00094705	MDAMB231-HS578t; MDAMB468-HS578t; MDAMB468-MDAMB231
P62195	19	2.51713	Hs 578T CTR	MDAMB468 CTR	26S proteasome regulatory subunit 8	PSMC5	58.873	0.00011399	0.00098151	MDAMB231-HS578t; MDAMB468-HS578t; MDAMB468-MDAMB231
Q99426	7	2.09041	Hs 578T CTR	MDAMB231 CTR	Tubulin-folding cofactor B	TBCB	58.057	0.00011862	0.0010098	MDAMB231-HS578t; MDAMB468-HS578t; MDAMB468-MDAMB231
P55957	3	9.46887	MDAMB468 CTR	Hs 578T CTR	BH3-interacting domain death agonist	BID	57.474	0.00012208	0.0010176	MDAMB231-HS578t; MDAMB468-HS578t; MDAMB468-MDAMB231
Q9P2E9	38	1.82629	Hs 578T CTR	MDAMB468 CTR	Ribosome-binding protein 1	RRBP1	57.401	0.00012253	0.0010176	MDAMB231-HS578t; MDAMB468-HS578t; MDAMB468-MDAMB231
P06493	9	1.75128	MDAMB231 CTR	Hs 578T CTR	Cyclin-dependent kinase 1	CDK1	57.374	0.00012269	0.0010176	MDAMB231-HS578t; MDAMB468-HS578t; MDAMB468-MDAMB231
Q15459	12	1.8428	Hs 578T CTR	MDAMB231 CTR	Splicing factor 3A subunit 1	SF3A1	57.086	0.00012447	0.0010286	MDAMB231-HS578t; MDAMB468-HS578t; MDAMB468-MDAMB231
P09493	13	2.06786	Hs 578T CTR	MDAMB231 CTR	Tropomyosin alpha-1 chain	TPM1	56.716	0.00012679	0.001044	MDAMB231-HS578t; MDAMB468-HS578t; MDAMB468-MDAMB231
Q8NFJ5	2	2.42186	MDAMB231 CTR	Hs 578T CTR	Retinoic acid-induced protein 3	GPRC5A	54.443	0.00014245	0.0011518	MDAMB231-HS578t; MDAMB468-HS578t; MDAMB468-MDAMB231
P55809	8	3.67322	Hs 578T CTR	MDAMB231 CTR	Succinyl-CoA:3-ketoacid coenzyme A transferase 1_ mitochondrial	OXCT1	54.201	0.00014426	0.0011624	MDAMB231-HS578t; MDAMB468-HS578t; MDAMB468-MDAMB231
Q07157	1	3.15301	Hs 578T CTR	MDAMB468 CTR	Tight junction protein ZO-1	TJP1	52.534	0.00015765	0.0012138	MDAMB231-HS578t; MDAMB468-HS578t; MDAMB468-MDAMB231
Q7KZF4	42	1.93446	Hs 578T CTR	MDAMB231 CTR	Staphylococcal nuclease domain-containing protein 1	SND1	52.383	0.00015894	0.0012155	MDAMB231-HS578t; MDAMB468-HS578t; MDAMB468-MDAMB231
P25205	15	1.79972	MDAMB468 CTR	MDAMB231 CTR	DNA replication licensing factor MCM3	MCM3	51.019	0.00017129	0.0012796	MDAMB231-HS578t; MDAMB468-HS578t; MDAMB468-MDAMB231
Q9NS25	9	4.53963	MDAMB231 CTR	Hs 578T CTR	Sperm protein associated with the nucleus on the X chromosome B1	SPANXB1	50.826	0.00017314	0.0012891	MDAMB231-HS578t; MDAMB468-HS578t; MDAMB468-MDAMB231
P05556	31	3.12848	Hs 578T CTR	MDAMB468 CTR	Integrin beta-1	ITGB1	50.28	0.00017852	0.0013118	MDAMB231-HS578t; MDAMB468-HS578t; MDAMB468-MDAMB231
P06744	29	1.92946	MDAMB468 CTR	MDAMB231 CTR	Glucose-6-phosphate isomerase	GPI	49.545	0.00018611	0.0013588	MDAMB231-HS578t; MDAMB468-HS578t; MDAMB468-MDAMB231
P51530	3	4.76404	Hs 578T CTR	MDAMB468 CTR	DNA replication ATP-dependent helicase/nuclease DNA2	DNA2	49.413	0.00018752	0.0013647	MDAMB231-HS578t; MDAMB468-HS578t; MDAMB468-MDAMB231
P04080	4	1.9146	MDAMB468 CTR	MDAMB231 CTR	Cystatin-B	CSTB	48.78	0.00019449	0.0014018	MDAMB231-HS578t; MDAMB468-HS578t; MDAMB468-MDAMB231
P55771	2	2.0751	Hs 578T CTR	MDAMB231 CTR	Paired box protein Pax-9	PAX9	48.459	0.00019815	0.0014057	MDAMB231-HS578t; MDAMB468-HS578t; MDAMB468-MDAMB231
P14550	10	2.2531	Hs 578T CTR	MDAMB468 CTR	Aldo-keto reductase family 1 member A1	AKR1A1	48.067	0.00020275	0.0014249	MDAMB231-HS578t; MDAMB468-HS578t; MDAMB468-MDAMB231
Q92900	24	1.42455	MDAMB468 CTR	MDAMB231 CTR	Regulator of nonsense transcripts 1	UPF1	47.954	0.0002041	0.0014292	MDAMB231-HS578t; MDAMB468-HS578t; MDAMB468-MDAMB231
P14854	5	2.52156	MDAMB468 CTR	Hs 578T CTR	Cytochrome c oxidase subunit 6B1	COX6B1	47.814	0.00020578	0.0014292	MDAMB231-HS578t; MDAMB468-HS578t; MDAMB468-MDAMB231
Q16186	5	1.9561	MDAMB231 CTR	Hs 578T CTR	Proteasomal ubiquitin receptor ADRM1	ADRM1	47.805	0.00020589	0.0014292	MDAMB231-HS578t; MDAMB468-HS578t; MDAMB468-MDAMB231
Q9BZE4	7	5.63708	Hs 578T CTR	MDAMB468 CTR	GTP-binding protein 4	GTPBP4	47.441	0.00021039	0.0014426	MDAMB231-HS578t; MDAMB468-HS578t; MDAMB468-MDAMB231
Q9NPF4	3	16.1973	Hs 578T CTR	MDAMB468 CTR	Probable tRNA N6-adenosine threonylcarbamoyltransferase	OSGEP	47.17	0.00021382	0.0014573	MDAMB231-HS578t; MDAMB468-HS578t; MDAMB468-MDAMB231
P53999	6	2.01302	Hs 578T CTR	MDAMB231 CTR	Activated RNA polymerase II transcriptional coactivator p15	SUB1	46.247	0.00022606	0.0015005	MDAMB231-HS578t; MDAMB468-HS578t; MDAMB468-MDAMB231
P06396	10	4.77122	Hs 578T CTR	MDAMB231 CTR	Gelsolin	GSN	46.198	0.00022673	0.0015005	MDAMB231-HS578t; MDAMB468-HS578t; MDAMB468-MDAMB231
Q14558	2	4.48049	MDAMB468 CTR	Hs 578T CTR	Phosphoribosyl pyrophosphate synthase-associated protein 1	PRPSAP1	46.193	0.00022681	0.0015005	MDAMB231-HS578t; MDAMB468-HS578t; MDAMB468-MDAMB231
Q9BPU6	3	4.11825	Hs 578T CTR	MDAMB468 CTR	Dihydropyrimidinase-related protein 5	DPYSL5	45.724	0.00023341	0.0015352	MDAMB231-HS578t; MDAMB468-HS578t; MDAMB468-MDAMB231
P61916	2	5.12433	MDAMB231 CTR	Hs 578T CTR	NPC intracellular cholesterol transporter 2	NPC2	45.502	0.00023663	0.0015429	MDAMB231-HS578t; MDAMB468-HS578t; MDAMB468-MDAMB231
P04899	13	3.94737	Hs 578T CTR	MDAMB468 CTR	Guanine nucleotide-binding protein G(i) subunit alpha-2	GNAI2	44.904	0.00024562	0.0015742	MDAMB231-HS578t; MDAMB468-HS578t; MDAMB468-MDAMB231
Q9H299	7	2.19126	Hs 578T CTR	MDAMB468 CTR	SH3 domain-binding glutamic acid-rich-like protein 3	SH3BGRL3	44.523	0.00025156	0.0016021	MDAMB231-HS578t; MDAMB468-HS578t; MDAMB468-MDAMB231
Q5TFE4	5	1.95695	Hs 578T CTR	MDAMB231 CTR	5'-nucleotidase domain-containing protein 1	NT5DC1	44.489	0.0002521	0.0016021	MDAMB231-HS578t; MDAMB468-HS578t; MDAMB468-MDAMB231
P37802	22	2.3966	Hs 578T CTR	MDAMB231 CTR	Transgelin-2	TAGLN2	44.143	0.0002577	0.0016208	MDAMB231-HS578t; MDAMB468-HS578t; MDAMB468-MDAMB231
Q96C36	2	26.0171	MDAMB231 CTR	Hs 578T CTR	Pyrroline-5-carboxylate reductase 2	PYCR2	43.837	0.00026278	0.0016376	MDAMB231-HS578t; MDAMB468-HS578t; MDAMB468-MDAMB231
P63208	7	2.21916	MDAMB468 CTR	MDAMB231 CTR	S-phase kinase-associated protein 1	SKP1	43.509	0.00026837	0.0016633	MDAMB231-HS578t; MDAMB468-HS578t; MDAMB468-MDAMB231
P08195	21	2.5435	Hs 578T CTR	MDAMB468 CTR	4F2 cell-surface antigen heavy chain	SLC3A2	43.427	0.00026981	0.0016677	MDAMB231-HS578t; MDAMB468-HS578t; MDAMB468-MDAMB231
P07954	14	2.31378	MDAMB468 CTR	Hs 578T CTR	Fumarate hydratase_ mitochondrial	FH	43.203	0.00027375	0.0016828	MDAMB231-HS578t; MDAMB468-HS578t; MDAMB468-MDAMB231
P28065	3	5.38319	Hs 578T CTR	MDAMB468 CTR	Proteasome subunit beta type-9	PSMB9	42.933	0.0002786	0.0017079	MDAMB231-HS578t; MDAMB468-HS578t; MDAMB468-MDAMB231
P00387	9	3.23042	Hs 578T CTR	MDAMB468 CTR	NADH-cytochrome b5 reductase 3	CYB5R3	42.42	0.00028816	0.0017452	MDAMB231-HS578t; MDAMB468-HS578t; MDAMB468-MDAMB231
Q9BXS5	4	2.47606	Hs 578T CTR	MDAMB468 CTR	AP-1 complex subunit mu-1	AP1M1	42.223	0.00029194	0.0017586	MDAMB231-HS578t; MDAMB468-HS578t; MDAMB468-MDAMB231
P00491	14	2.82113	MDAMB468 CTR	Hs 578T CTR	Purine nucleoside phosphorylase	PNP	41.608	0.00030418	0.0018003	MDAMB231-HS578t; MDAMB468-HS578t; MDAMB468-MDAMB231
Q13347	13	2.31	MDAMB468 CTR	Hs 578T CTR	Eukaryotic translation initiation factor 3 subunit I	EIF3I	41.576	0.00030483	0.0018003	MDAMB231-HS578t; MDAMB468-HS578t; MDAMB468-MDAMB231
Q9BVP2	2	3.44292	MDAMB468 CTR	Hs 578T CTR	Guanine nucleotide-binding protein-like 3	GNL3	41.365	0.00030919	0.0018118	MDAMB231-HS578t; MDAMB468-HS578t; MDAMB468-MDAMB231
P30740	9	1.8476	Hs 578T CTR	MDAMB231 CTR	Leukocyte elastase inhibitor	SERPINB1	41.093	0.00031495	0.0018408	MDAMB231-HS578t; MDAMB468-HS578t; MDAMB468-MDAMB231
O96019	10	1.403	MDAMB468 CTR	Hs 578T CTR	Actin-like protein 6A	ACTL6A	40.67	0.0003242	0.0018689	MDAMB231-HS578t; MDAMB468-HS578t; MDAMB468-MDAMB231
Q99961	2	2.74628	Hs 578T CTR	MDAMB468 CTR	Endophilin-A2	SH3GL1	40.449	0.00032918	0.0018848	MDAMB231-HS578t; MDAMB468-HS578t; MDAMB468-MDAMB231
Q16352	4	1.75322	MDAMB468 CTR	Hs 578T CTR	Alpha-internexin	INA	39.569	0.00035	0.0019606	MDAMB231-HS578t; MDAMB468-HS578t; MDAMB468-MDAMB231
O43488	9	2.97664	Hs 578T CTR	MDAMB468 CTR	Aflatoxin B1 aldehyde reductase member 2	AKR7A2	39.201	0.00035924	0.0020011	MDAMB231-HS578t; MDAMB468-HS578t; MDAMB468-MDAMB231
Q7Z3Z0	3	2.27623	MDAMB231 CTR	Hs 578T CTR	Keratin_ type I cytoskeletal 25	KRT25	39.024	0.00036382	0.0020166	MDAMB231-HS578t; MDAMB468-HS578t; MDAMB468-MDAMB231
P17661	5	2.04574	Hs 578T CTR	MDAMB468 CTR	Desmin	DES	38.442	0.00037936	0.0020823	MDAMB231-HS578t; MDAMB468-HS578t; MDAMB468-MDAMB231
P53634	9	3.47702	MDAMB231 CTR	Hs 578T CTR	Dipeptidyl peptidase 1	CTSC	38.197	0.00038615	0.0021042	MDAMB231-HS578t; MDAMB468-HS578t; MDAMB468-MDAMB231
Q96E39	2	3.42086	MDAMB231 CTR	Hs 578T CTR	RNA binding motif protein_ X-linked-like-1	RBMXL1	37.938	0.00039354	0.0021394	MDAMB231-HS578t; MDAMB468-HS578t; MDAMB468-MDAMB231
P63151	9	1.76191	MDAMB231 CTR	MDAMB468 CTR	Serine/threonine-protein phosphatase 2A 55 kDa regulatory subunit B alpha isoform	PPP2R2A	37.613	0.00040306	0.0021806	MDAMB231-HS578t; MDAMB468-HS578t; MDAMB468-MDAMB231
Q99808	2	4.76054	MDAMB231 CTR	Hs 578T CTR	Equilibrative nucleoside transporter 1	SLC29A1	37.134	0.00041767	0.0022276	MDAMB231-HS578t; MDAMB468-HS578t; MDAMB468-MDAMB231
O60832	8	2.61238	Hs 578T CTR	MDAMB231 CTR	H/ACA ribonucleoprotein complex subunit DKC1	DKC1	37.093	0.00041894	0.0022291	MDAMB231-HS578t; MDAMB468-HS578t; MDAMB468-MDAMB231
Q92506	1	3.27411	Hs 578T CTR	MDAMB231 CTR	(3R)-3-hydroxyacyl-CoA dehydrogenase	HSD17B8	36.989	0.00042221	0.0022321	MDAMB231-HS578t; MDAMB468-HS578t; MDAMB468-MDAMB231
P54136	18	3.95606	MDAMB468 CTR	MDAMB231 CTR	Arginine--tRNA ligase_ cytoplasmic	RARS1	36.981	0.00042248	0.0022321	MDAMB231-HS578t; MDAMB468-HS578t; MDAMB468-MDAMB231
Q04941	2	1.64002	MDAMB231 CTR	MDAMB468 CTR	Proteolipid protein 2	PLP2	36.52	0.00043743	0.002295	MDAMB231-HS578t; MDAMB468-HS578t; MDAMB468-MDAMB231
P40121	8	1.90725	MDAMB231 CTR	Hs 578T CTR	Macrophage-capping protein	CAPG	36.247	0.00044662	0.0023324	MDAMB231-HS578t; MDAMB468-HS578t; MDAMB468-MDAMB231
P61960	2	2.93271	Hs 578T CTR	MDAMB231 CTR	Ubiquitin-fold modifier 1	UFM1	35.983	0.00045576	0.0023637	MDAMB231-HS578t; MDAMB468-HS578t; MDAMB468-MDAMB231
Q9Y5L4	6	2.18796	Hs 578T CTR	MDAMB468 CTR	Mitochondrial import inner membrane translocase subunit Tim13	TIMM13	35.511	0.00047273	0.0024293	MDAMB231-HS578t; MDAMB468-HS578t; MDAMB468-MDAMB231
O95757	15	1.52363	MDAMB231 CTR	MDAMB468 CTR	Heat shock 70 kDa protein 4L	HSPA4L	35.295	0.00048075	0.0024483	MDAMB231-HS578t; MDAMB468-HS578t; MDAMB468-MDAMB231
P30613	11	2.36973	Hs 578T CTR	MDAMB231 CTR	Pyruvate kinase PKLR	PKLR	34.849	0.00049795	0.0025198	MDAMB231-HS578t; MDAMB468-HS578t; MDAMB468-MDAMB231
Q13155	8	1.78857	MDAMB468 CTR	Hs 578T CTR	Aminoacyl tRNA synthase complex-interacting multifunctional protein 2	AIMP2	34.564	0.0005094	0.0025463	MDAMB231-HS578t; MDAMB468-HS578t; MDAMB468-MDAMB231
Q14108	2	12.2853	Hs 578T CTR	MDAMB231 CTR	Lysosome membrane protein 2	SCARB2	33.909	0.00053697	0.0026164	MDAMB231-HS578t; MDAMB468-HS578t; MDAMB468-MDAMB231
Q495B1	1	2.21776	Hs 578T CTR	MDAMB231 CTR	Ankyrin repeat and death domain-containing protein 1A	ANKDD1A	33.585	0.0005514	0.0026524	MDAMB231-HS578t; MDAMB468-HS578t; MDAMB468-MDAMB231
P50416	4	3.68783	Hs 578T CTR	MDAMB231 CTR	Carnitine O-palmitoyltransferase 1_ liver isoform	CPT1A	32.905	0.00058333	0.0027763	MDAMB231-HS578t; MDAMB468-HS578t; MDAMB468-MDAMB231
Q6ZSJ8	2	2.07174	Hs 578T CTR	MDAMB231 CTR	Uncharacterized protein C1orf122	C1orf122	32.736	0.00059164	0.0027982	MDAMB231-HS578t; MDAMB468-HS578t; MDAMB468-MDAMB231
Q8TEX9	14	2.13164	MDAMB468 CTR	Hs 578T CTR	Importin-4	IPO4	32.534	0.00060179	0.0028225	MDAMB231-HS578t; MDAMB468-HS578t; MDAMB468-MDAMB231
Q96K17	6	1.81413	MDAMB468 CTR	Hs 578T CTR	Transcription factor BTF3 homolog 4	BTF3L4	31.462	0.0006597	0.0030068	MDAMB231-HS578t; MDAMB468-HS578t; MDAMB468-MDAMB231
P07195	24	2.48294	Hs 578T CTR	MDAMB468 CTR	L-lactate dehydrogenase B chain	LDHB	31.438	0.00066107	0.0030068	MDAMB231-HS578t; MDAMB468-HS578t; MDAMB468-MDAMB231
Q15435	5	2.20072	MDAMB468 CTR	MDAMB231 CTR	Protein phosphatase 1 regulatory subunit 7	PPP1R7	31.048	0.00068405	0.0030864	MDAMB231-HS578t; MDAMB468-HS578t; MDAMB468-MDAMB231
P31689	10	1.77155	MDAMB468 CTR	Hs 578T CTR	DnaJ homolog subfamily A member 1	DNAJA1	30.598	0.0007119	0.0031647	MDAMB231-HS578t; MDAMB468-HS578t; MDAMB468-MDAMB231
P0C7I0	3	3.16523	Hs 578T CTR	MDAMB468 CTR	Inactive ubiquitin carboxyl-terminal hydrolase 17-like protein 8	USP17L8	30.535	0.00071591	0.0031647	MDAMB231-HS578t; MDAMB468-HS578t; MDAMB468-MDAMB231
P49588	38	1.89014	Hs 578T CTR	MDAMB231 CTR	Alanine--tRNA ligase_ cytoplasmic	AARS1	30.521	0.00071683	0.0031647	MDAMB231-HS578t; MDAMB468-HS578t; MDAMB468-MDAMB231
Q9Y371	2	6.24524	Hs 578T CTR	MDAMB231 CTR	Endophilin-B1	SH3GLB1	30.446	0.00072163	0.0031793	MDAMB231-HS578t; MDAMB468-HS578t; MDAMB468-MDAMB231
Q15404	11	2.11968	Hs 578T CTR	MDAMB231 CTR	Ras suppressor protein 1	RSU1	30.426	0.00072296	0.0031793	MDAMB231-HS578t; MDAMB468-HS578t; MDAMB468-MDAMB231
O75489	4	1.81566	Hs 578T CTR	MDAMB231 CTR	NADH dehydrogenase [ubiquinone] iron-sulfur protein 3_ mitochondrial	NDUFS3	30.314	0.00073027	0.0031994	MDAMB231-HS578t; MDAMB468-HS578t; MDAMB468-MDAMB231
Q99848	7	2.88607	MDAMB468 CTR	Hs 578T CTR	Probable rRNA-processing protein EBP2	EBNA1BP2	30.225	0.00073612	0.0032018	MDAMB231-HS578t; MDAMB468-HS578t; MDAMB468-MDAMB231
Q9UNN8	1	5.88658	MDAMB231 CTR	Hs 578T CTR	Endothelial protein C receptor	PROCR	30.007	0.00075084	0.0032513	MDAMB231-HS578t; MDAMB468-HS578t; MDAMB468-MDAMB231
Q15424	17	1.29295	Hs 578T CTR	MDAMB231 CTR	Scaffold attachment factor B1	SAFB	29.819	0.0007638	0.003301	MDAMB231-HS578t; MDAMB468-HS578t; MDAMB468-MDAMB231
P84103	6	2.02783	MDAMB468 CTR	MDAMB231 CTR	Serine/arginine-rich splicing factor 3	SRSF3	29.559	0.00078224	0.0033608	MDAMB231-HS578t; MDAMB468-HS578t; MDAMB468-MDAMB231
Q53H82	1	4.71125	MDAMB231 CTR	MDAMB468 CTR	Endoribonuclease LACTB2	LACTB2	29.541	0.00078358	0.0033608	MDAMB231-HS578t; MDAMB468-HS578t; MDAMB468-MDAMB231
Q9Y2Q3	2	2.99367	MDAMB468 CTR	MDAMB231 CTR	Glutathione S-transferase kappa 1	GSTK1	29.461	0.00078934	0.0033726	MDAMB231-HS578t; MDAMB468-HS578t; MDAMB468-MDAMB231
P40123	6	1.62943	Hs 578T CTR	MDAMB468 CTR	Adenylyl cyclase-associated protein 2	CAP2	29.342	0.00079813	0.0033849	MDAMB231-HS578t; MDAMB468-HS578t; MDAMB468-MDAMB231
Q96Q40	3	3.17934	Hs 578T CTR	MDAMB468 CTR	Cyclin-dependent kinase 15	CDK15	28.944	0.00082835	0.00345	MDAMB231-HS578t; MDAMB468-HS578t; MDAMB468-MDAMB231
P54819	10	2.05677	MDAMB468 CTR	Hs 578T CTR	Adenylate kinase 2_ mitochondrial	AK2	28.502	0.00086369	0.0035686	MDAMB231-HS578t; MDAMB468-HS578t; MDAMB468-MDAMB231
P61158	24	1.8398	Hs 578T CTR	MDAMB468 CTR	Actin-related protein 3	ACTR3	28.126	0.00089537	0.0036481	MDAMB231-HS578t; MDAMB468-HS578t; MDAMB468-MDAMB231
P43490	22	2.80609	MDAMB231 CTR	Hs 578T CTR	Nicotinamide phosphoribosyltransferase	NAMPT	28.069	0.00090027	0.0036595	MDAMB231-HS578t; MDAMB468-HS578t; MDAMB468-MDAMB231
Q6EEV6	1	5.51697	MDAMB468 CTR	Hs 578T CTR	Small ubiquitin-related modifier 4	SUMO4	27.915	0.00091385	0.0036844	MDAMB231-HS578t; MDAMB468-HS578t; MDAMB468-MDAMB231
Q96DY7	2	1.90033	MDAMB468 CTR	Hs 578T CTR	Mdm2-binding protein	MTBP	27.668	0.00093607	0.0037311	MDAMB231-HS578t; MDAMB468-HS578t; MDAMB468-MDAMB231
Q15370	3	1.99154	MDAMB231 CTR	Hs 578T CTR	Elongin-B	ELOB	26.835	0.0010167	0.0039515	MDAMB231-HS578t; MDAMB468-HS578t; MDAMB468-MDAMB231
Q9BQ24	1	4.77311	Hs 578T CTR	MDAMB231 CTR	Zinc finger FYVE domain-containing protein 21	ZFYVE21	26.765	0.0010239	0.0039603	MDAMB231-HS578t; MDAMB468-HS578t; MDAMB468-MDAMB231
O14880	3	5.07867	Hs 578T CTR	MDAMB231 CTR	Microsomal glutathione S-transferase 3	MGST3	26.752	0.0010252	0.0039603	MDAMB231-HS578t; MDAMB468-HS578t; MDAMB468-MDAMB231
O00154	7	1.72307	Hs 578T CTR	MDAMB468 CTR	Cytosolic acyl coenzyme A thioester hydrolase	ACOT7	26.516	0.00105	0.004015	MDAMB231-HS578t; MDAMB468-HS578t; MDAMB468-MDAMB231
Q3LXA3	1	12.6718	MDAMB468 CTR	MDAMB231 CTR	Triokinase/FMN cyclase	TKFC	25.816	0.0011284	0.0041939	MDAMB231-HS578t; MDAMB468-HS578t; MDAMB468-MDAMB231
Q2VIQ3	1	13.9599	Hs 578T CTR	MDAMB231 CTR	Chromosome-associated kinesin KIF4B	KIF4B	25.553	0.0011599	0.0042548	MDAMB231-HS578t; MDAMB468-HS578t; MDAMB468-MDAMB231
P17066	11	2.31671	Hs 578T CTR	MDAMB231 CTR	Heat shock 70 kDa protein 6	HSPA6	25.318	0.001189	0.0043332	MDAMB231-HS578t; MDAMB468-HS578t; MDAMB468-MDAMB231
P61081	3	1.63442	Hs 578T CTR	MDAMB231 CTR	NEDD8-conjugating enzyme Ubc12	UBE2M	25.254	0.0011971	0.0043558	MDAMB231-HS578t; MDAMB468-HS578t; MDAMB468-MDAMB231
P49458	1	1.6045	MDAMB468 CTR	Hs 578T CTR	Signal recognition particle 9 kDa protein	SRP9	25.114	0.0012151	0.004393	MDAMB231-HS578t; MDAMB468-HS578t; MDAMB468-MDAMB231
Q13740	7	5.26855	Hs 578T CTR	MDAMB468 CTR	CD166 antigen	ALCAM	25.026	0.0012266	0.0044133	MDAMB231-HS578t; MDAMB468-HS578t; MDAMB468-MDAMB231
P54886	11	1.4037	Hs 578T CTR	MDAMB231 CTR	Delta-1-pyrroline-5-carboxylate synthase	ALDH18A1	24.745	0.0012642	0.0044703	MDAMB231-HS578t; MDAMB468-HS578t; MDAMB468-MDAMB231
Q9Y678	32	1.78523	Hs 578T CTR	MDAMB231 CTR	Coatomer subunit gamma-1	COPG1	24.212	0.00134	0.0046795	MDAMB231-HS578t; MDAMB468-HS578t; MDAMB468-MDAMB231
P62873	12	2.08643	Hs 578T CTR	MDAMB231 CTR	Guanine nucleotide-binding protein G(I)/G(S)/G(T) subunit beta-1	GNB1	24.017	0.0013691	0.0047301	MDAMB231-HS578t; MDAMB468-HS578t; MDAMB468-MDAMB231
P04843	19	2.34943	Hs 578T CTR	MDAMB231 CTR	Dolichyl-diphosphooligosaccharide--protein glycosyltransferase subunit 1	RPN1	23.758	0.0014092	0.0048282	MDAMB231-HS578t; MDAMB468-HS578t; MDAMB468-MDAMB231
P50552	10	1.90882	Hs 578T CTR	MDAMB231 CTR	Vasodilator-stimulated phosphoprotein	VASP	23.751	0.0014104	0.0048282	MDAMB231-HS578t; MDAMB468-HS578t; MDAMB468-MDAMB231
Q9Y2B0	5	2.66721	Hs 578T CTR	MDAMB231 CTR	Protein canopy homolog 2	CNPY2	23.235	0.0014953	0.0049683	MDAMB231-HS578t; MDAMB468-HS578t; MDAMB468-MDAMB231
A0A075B6T6	1	2.48388	Hs 578T CTR	MDAMB231 CTR	T cell receptor alpha variable 12-2	TRAV12-2	23.069	0.001524	0.0050486	MDAMB231-HS578t; MDAMB468-HS578t; MDAMB468-MDAMB231
Q99829	13	2.14337	MDAMB231 CTR	MDAMB468 CTR	Copine-1	CPNE1	23.044	0.0015285	0.0050561	MDAMB231-HS578t; MDAMB468-HS578t; MDAMB468-MDAMB231
Q9UHD1	8	2.25707	MDAMB468 CTR	MDAMB231 CTR	Cysteine and histidine-rich domain-containing protein 1	CHORDC1	22.96	0.0015433	0.0050894	MDAMB231-HS578t; MDAMB468-HS578t; MDAMB468-MDAMB231
A6NIZ1	1	2.0363	Hs 578T CTR	MDAMB468 CTR	Ras-related protein Rap-1b-like protein	RAP1BL	22.601	0.0016091	0.005186	MDAMB231-HS578t; MDAMB468-HS578t; MDAMB468-MDAMB231
O14980	44	2.09075	Hs 578T CTR	MDAMB231 CTR	Exportin-1	XPO1	22.362	0.0016551	0.0053113	MDAMB231-HS578t; MDAMB468-HS578t; MDAMB468-MDAMB231
O00358	2	1.99839	MDAMB468 CTR	Hs 578T CTR	Forkhead box protein E1	FOXE1	22.29	0.0016692	0.0053414	MDAMB231-HS578t; MDAMB468-HS578t; MDAMB468-MDAMB231
P16444	1	1.79227	Hs 578T CTR	MDAMB231 CTR	Dipeptidase 1	DPEP1	21.603	0.0018131	0.0056418	MDAMB231-HS578t; MDAMB468-HS578t; MDAMB468-MDAMB231
P46777	16	2.06856	Hs 578T CTR	MDAMB231 CTR	60S ribosomal protein L5	RPL5	21.394	0.00186	0.0057168	MDAMB231-HS578t; MDAMB468-HS578t; MDAMB468-MDAMB231
Q15637	8	1.58148	MDAMB468 CTR	MDAMB231 CTR	Splicing factor 1	SF1	21.28	0.0018863	0.0057584	MDAMB231-HS578t; MDAMB468-HS578t; MDAMB468-MDAMB231
Q9Y3I0	19	1.33798	Hs 578T CTR	MDAMB231 CTR	RNA-splicing ligase RtcB homolog	RTCB	21.186	0.0019085	0.0057792	MDAMB231-HS578t; MDAMB468-HS578t; MDAMB468-MDAMB231
P29401	41	2.55497	Hs 578T CTR	MDAMB231 CTR	Transketolase	TKT	20.494	0.0020822	0.0061645	MDAMB231-HS578t; MDAMB468-HS578t; MDAMB468-MDAMB231
O43175	28	10.3917	MDAMB468 CTR	MDAMB231 CTR	D-3-phosphoglycerate dehydrogenase	PHGDH	313.96	8.4795e-07	8.3173e-05	MDAMB231-HS578t; MDAMB468-MDAMB231
P10321	5	2.44208	MDAMB231 CTR	Hs 578T CTR	HLA class I histocompatibility antigen_ C alpha chain	HLA-C	206.24	2.9471e-06	0.0001396	MDAMB231-HS578t; MDAMB468-MDAMB231
P30043	4	2.77562	Hs 578T CTR	MDAMB231 CTR	Flavin reductase (NADPH)	BLVRB	140.5	9.1379e-06	0.00023358	MDAMB231-HS578t; MDAMB468-MDAMB231
P51659	17	2.21443	MDAMB468 CTR	MDAMB231 CTR	Peroxisomal multifunctional enzyme type 2	HSD17B4	123.19	1.3436e-05	0.00027063	MDAMB231-HS578t; MDAMB468-MDAMB231
P48735	17	3.59483	Hs 578T CTR	MDAMB231 CTR	Isocitrate dehydrogenase [NADP]_ mitochondrial	IDH2	107.65	1.9928e-05	0.00035399	MDAMB231-HS578t; MDAMB468-MDAMB231
Q8NBQ5	3	4.30896	MDAMB231 CTR	Hs 578T CTR	Estradiol 17-beta-dehydrogenase 11	HSD17B11	88.54	3.52e-05	0.00047698	MDAMB231-HS578t; MDAMB468-MDAMB231
P16422	4	1.77251	MDAMB468 CTR	MDAMB231 CTR	Epithelial cell adhesion molecule	EPCAM	88.264	3.552e-05	0.00047698	MDAMB231-HS578t; MDAMB468-MDAMB231
Q96IZ0	5	3.50207	MDAMB231 CTR	Hs 578T CTR	PRKC apoptosis WT1 regulator protein	PAWR	85.479	3.8981e-05	0.00049631	MDAMB231-HS578t; MDAMB468-MDAMB231
P26196	9	1.93682	MDAMB468 CTR	MDAMB231 CTR	Probable ATP-dependent RNA helicase DDX6	DDX6	76.802	5.3128e-05	0.00060406	MDAMB231-HS578t; MDAMB468-MDAMB231
O43390	17	1.55549	Hs 578T CTR	MDAMB231 CTR	Heterogeneous nuclear ribonucleoprotein R	HNRNPR	75.499	5.5819e-05	0.00062285	MDAMB231-HS578t; MDAMB468-MDAMB231
Q92597	8	2.10466	MDAMB231 CTR	Hs 578T CTR	Protein NDRG1	NDRG1	74.853	5.722e-05	0.00063278	MDAMB231-HS578t; MDAMB468-MDAMB231
Q09028	7	1.94075	MDAMB468 CTR	MDAMB231 CTR	Histone-binding protein RBBP4	RBBP4	69.569	7.0649e-05	0.00071153	MDAMB231-HS578t; MDAMB468-MDAMB231
P60983	3	5.78256	MDAMB231 CTR	Hs 578T CTR	Glia maturation factor beta	GMFB	67.357	7.7526e-05	0.00076375	MDAMB231-HS578t; MDAMB468-MDAMB231
Q8NC51	17	1.61305	MDAMB468 CTR	MDAMB231 CTR	Plasminogen activator inhibitor 1 RNA-binding protein	SERBP1	66.653	7.9899e-05	0.00077448	MDAMB231-HS578t; MDAMB468-MDAMB231
O95292	5	1.2892	Hs 578T CTR	MDAMB231 CTR	Vesicle-associated membrane protein-associated protein B/C	VAPB	64.967	8.5993e-05	0.00082203	MDAMB231-HS578t; MDAMB468-MDAMB231
P30626	3	2.82476	MDAMB468 CTR	MDAMB231 CTR	Sorcin	SRI	62.192	9.745e-05	0.00088292	MDAMB231-HS578t; MDAMB468-MDAMB231
P27348	14	1.71287	MDAMB468 CTR	MDAMB231 CTR	14-3-3 protein theta	YWHAQ	60.059	0.00010768	0.00094705	MDAMB231-HS578t; MDAMB468-MDAMB231
Q9H0I2	3	1.58855	MDAMB468 CTR	MDAMB231 CTR	Enkurin domain-containing protein 1	ENKD1	57.861	0.00011977	0.001012	MDAMB231-HS578t; MDAMB468-MDAMB231
Q16643	9	1.97511	MDAMB468 CTR	MDAMB231 CTR	Drebrin	DBN1	57.742	0.00012048	0.0010142	MDAMB231-HS578t; MDAMB468-MDAMB231
O75534	16	1.77444	MDAMB468 CTR	MDAMB231 CTR	Cold shock domain-containing protein E1	CSDE1	55.99	0.00013153	0.0010713	MDAMB231-HS578t; MDAMB468-MDAMB231
Q9UNF1	7	2.0084	Hs 578T CTR	MDAMB231 CTR	Melanoma-associated antigen D2	MAGED2	54.645	0.00014096	0.0011439	MDAMB231-HS578t; MDAMB468-MDAMB231
P09960	19	1.43458	MDAMB231 CTR	Hs 578T CTR	Leukotriene A-4 hydrolase	LTA4H	53.372	0.00015072	0.0011889	MDAMB231-HS578t; MDAMB468-MDAMB231
O95571	6	2.60986	MDAMB468 CTR	MDAMB231 CTR	Persulfide dioxygenase ETHE1_ mitochondrial	ETHE1	51.925	0.00016295	0.0012322	MDAMB231-HS578t; MDAMB468-MDAMB231
Q15084	19	2.27835	Hs 578T CTR	MDAMB231 CTR	Protein disulfide-isomerase A6	PDIA6	50.29	0.00017841	0.0013118	MDAMB231-HS578t; MDAMB468-MDAMB231
Q15019	19	1.79228	Hs 578T CTR	MDAMB231 CTR	Septin-2	SEPTIN2	49.33	0.00018841	0.0013667	MDAMB231-HS578t; MDAMB468-MDAMB231
P62879	8	2.26552	MDAMB468 CTR	MDAMB231 CTR	Guanine nucleotide-binding protein G(I)/G(S)/G(T) subunit beta-2	GNB2	48.497	0.00019771	0.0014057	MDAMB231-HS578t; MDAMB468-MDAMB231
Q92599	4	1.7296	MDAMB468 CTR	MDAMB231 CTR	Septin-8	SEPTIN8	45.125	0.00024225	0.001563	MDAMB231-HS578t; MDAMB468-MDAMB231
Q8IX03	5	2.56975	Hs 578T CTR	MDAMB231 CTR	Protein KIBRA	WWC1	44.435	0.00025297	0.0016031	MDAMB231-HS578t; MDAMB468-MDAMB231
P62891	2	1.45143	MDAMB468 CTR	MDAMB231 CTR	60S ribosomal protein L39	RPL39	44.345	0.00025442	0.0016077	MDAMB231-HS578t; MDAMB468-MDAMB231
O15371	18	1.5214	MDAMB468 CTR	MDAMB231 CTR	Eukaryotic translation initiation factor 3 subunit D	EIF3D	44.13	0.00025791	0.0016208	MDAMB231-HS578t; MDAMB468-MDAMB231
Q12926	3	2.3482	Hs 578T CTR	MDAMB231 CTR	ELAV-like protein 2	ELAVL2	43.997	0.0002601	0.00163	MDAMB231-HS578t; MDAMB468-MDAMB231
P35237	10	2.71774	MDAMB231 CTR	MDAMB468 CTR	Serpin B6	SERPINB6	43.859	0.00026241	0.0016376	MDAMB231-HS578t; MDAMB468-MDAMB231
P23246	22	1.54748	MDAMB468 CTR	MDAMB231 CTR	Splicing factor_ proline- and glutamine-rich	SFPQ	42.53	0.00028607	0.0017396	MDAMB231-HS578t; MDAMB468-MDAMB231
Q9Y2J8	13	2.35393	MDAMB468 CTR	MDAMB231 CTR	Protein-arginine deiminase type-2	PADI2	42.4	0.00028854	0.0017452	MDAMB231-HS578t; MDAMB468-MDAMB231
O43865	3	1.95042	Hs 578T CTR	MDAMB231 CTR	S-adenosylhomocysteine hydrolase-like protein 1	AHCYL1	41.833	0.00029961	0.0017834	MDAMB231-HS578t; MDAMB468-MDAMB231
Q02218	8	2.37359	MDAMB231 CTR	Hs 578T CTR	2-oxoglutarate dehydrogenase_ mitochondrial	OGDH	41.477	0.00030686	0.0018075	MDAMB231-HS578t; MDAMB468-MDAMB231
P23229	6	2.63267	MDAMB231 CTR	MDAMB468 CTR	Integrin alpha-6	ITGA6	40.813	0.00032104	0.0018571	MDAMB231-HS578t; MDAMB468-MDAMB231
Q8WUN7	1	2.72222	MDAMB468 CTR	MDAMB231 CTR	Ubiquitin domain-containing protein 2	UBTD2	40.646	0.00032473	0.0018689	MDAMB231-HS578t; MDAMB468-MDAMB231
O75494	4	1.75658	MDAMB468 CTR	MDAMB231 CTR	Serine/arginine-rich splicing factor 10	SRSF10	39.293	0.00035691	0.001993	MDAMB231-HS578t; MDAMB468-MDAMB231
Q9UHG3	9	1.87296	Hs 578T CTR	MDAMB231 CTR	Prenylcysteine oxidase 1	PCYOX1	38.476	0.00037842	0.0020823	MDAMB231-HS578t; MDAMB468-MDAMB231
P22413	2	29.2506	MDAMB231 CTR	Hs 578T CTR	Ectonucleotide pyrophosphatase/phosphodiesterase family member 1	ENPP1	38.367	0.00038141	0.0020839	MDAMB231-HS578t; MDAMB468-MDAMB231
O95831	10	1.54995	Hs 578T CTR	MDAMB231 CTR	Apoptosis-inducing factor 1_ mitochondrial	AIFM1	37.288	0.0004129	0.0022155	MDAMB231-HS578t; MDAMB468-MDAMB231
P50502	13	1.97404	MDAMB468 CTR	MDAMB231 CTR	Hsc70-interacting protein	ST13	36.406	0.00044125	0.0023097	MDAMB231-HS578t; MDAMB468-MDAMB231
Q16181	19	1.93807	MDAMB468 CTR	MDAMB231 CTR	Septin-7	SEPTIN7	36.042	0.00045369	0.0023583	MDAMB231-HS578t; MDAMB468-MDAMB231
Q14247	14	1.56597	Hs 578T CTR	MDAMB231 CTR	Src substrate cortactin	CTTN	35.001	0.00049203	0.0025001	MDAMB231-HS578t; MDAMB468-MDAMB231
P50213	4	2.00883	MDAMB468 CTR	MDAMB231 CTR	Isocitrate dehydrogenase [NAD] subunit alpha_ mitochondrial	IDH3A	34.392	0.00051645	0.0025607	MDAMB231-HS578t; MDAMB468-MDAMB231
Q8IVW6	2	1.62809	MDAMB231 CTR	MDAMB468 CTR	AT-rich interactive domain-containing protein 3B	ARID3B	34.231	0.00052316	0.0025752	MDAMB231-HS578t; MDAMB468-MDAMB231
Q9Y4L1	35	1.75173	Hs 578T CTR	MDAMB231 CTR	Hypoxia up-regulated protein 1	HYOU1	34.218	0.00052372	0.0025752	MDAMB231-HS578t; MDAMB468-MDAMB231
Q8N163	17	1.43096	Hs 578T CTR	MDAMB231 CTR	Cell cycle and apoptosis regulator protein 2	CCAR2	33.341	0.00056258	0.0026926	MDAMB231-HS578t; MDAMB468-MDAMB231
P17516	4	2.09986	Hs 578T CTR	MDAMB231 CTR	Aldo-keto reductase family 1 member C4	AKR1C4	32.283	0.00061471	0.0028535	MDAMB231-HS578t; MDAMB468-MDAMB231
Q9HAV0	1	1.72203	MDAMB468 CTR	MDAMB231 CTR	Guanine nucleotide-binding protein subunit beta-4	GNB4	32.077	0.00062558	0.0028908	MDAMB231-HS578t; MDAMB468-MDAMB231
O75832	3	1.76798	MDAMB468 CTR	MDAMB231 CTR	26S proteasome non-ATPase regulatory subunit 10	PSMD10	31.576	0.00065318	0.0030012	MDAMB231-HS578t; MDAMB468-MDAMB231
Q96FJ2	2	1.75871	MDAMB231 CTR	MDAMB468 CTR	Dynein light chain 2_ cytoplasmic	DYNLL2	31.503	0.00065732	0.0030068	MDAMB231-HS578t; MDAMB468-MDAMB231
Q8NHP1	1	1.8768	Hs 578T CTR	MDAMB231 CTR	Aflatoxin B1 aldehyde reductase member 4	AKR7L	30.99	0.00068755	0.003096	MDAMB231-HS578t; MDAMB468-MDAMB231
O60869	4	1.53298	Hs 578T CTR	MDAMB231 CTR	Endothelial differentiation-related factor 1	EDF1	30.244	0.00073487	0.0032018	MDAMB231-HS578t; MDAMB468-MDAMB231
O15145	8	1.61222	Hs 578T CTR	MDAMB231 CTR	Actin-related protein 2/3 complex subunit 3	ARPC3	29.465	0.00078908	0.0033726	MDAMB231-HS578t; MDAMB468-MDAMB231
Q9NPB0	1	2.10318	Hs 578T CTR	MDAMB231 CTR	SAYSvFN domain-containing protein 1	SAYSD1	29.188	0.00080962	0.0034013	MDAMB231-HS578t; MDAMB468-MDAMB231
P61088	6	1.36723	MDAMB231 CTR	MDAMB468 CTR	Ubiquitin-conjugating enzyme E2 N	UBE2N	29.004	0.00082365	0.0034422	MDAMB231-HS578t; MDAMB468-MDAMB231
P62913	5	2.13079	MDAMB468 CTR	MDAMB231 CTR	60S ribosomal protein L11	RPL11	28.915	0.00083059	0.0034508	MDAMB231-HS578t; MDAMB468-MDAMB231
Q9UBW8	1	3.13929	MDAMB231 CTR	Hs 578T CTR	COP9 signalosome complex subunit 7a	COPS7A	28.161	0.0008923	0.0036481	MDAMB231-HS578t; MDAMB468-MDAMB231
Q70UQ0	3	2.56588	MDAMB231 CTR	Hs 578T CTR	Inhibitor of nuclear factor kappa-B kinase-interacting protein	IKBIP	28.128	0.00089519	0.0036481	MDAMB231-HS578t; MDAMB468-MDAMB231
Q6DKJ4	2	5.5737	MDAMB231 CTR	Hs 578T CTR	Nucleoredoxin	NXN	27.802	0.00092393	0.0037023	MDAMB231-HS578t; MDAMB468-MDAMB231
O75947	6	1.41838	Hs 578T CTR	MDAMB231 CTR	ATP synthase subunit d_ mitochondrial	ATP5PD	27.63	0.0009396	0.0037385	MDAMB231-HS578t; MDAMB468-MDAMB231
Q9Y3C6	5	1.42396	MDAMB231 CTR	Hs 578T CTR	Peptidyl-prolyl cis-trans isomerase-like 1	PPIL1	27.06	0.000994	0.0039135	MDAMB231-HS578t; MDAMB468-MDAMB231
Q9P0V9	5	1.71986	MDAMB231 CTR	Hs 578T CTR	Septin-10	SEPTIN10	26.921	0.0010079	0.0039506	MDAMB231-HS578t; MDAMB468-MDAMB231
P0DMV8	35	2.0757	Hs 578T CTR	MDAMB231 CTR	Heat shock 70 kDa protein 1A	HSPA1A	26.825	0.0010177	0.0039515	MDAMB231-HS578t; MDAMB468-MDAMB231
Q9UFN0	2	2.91077	Hs 578T CTR	MDAMB231 CTR	Protein NipSnap homolog 3A	NIPSNAP3A	26.761	0.0010242	0.0039603	MDAMB231-HS578t; MDAMB468-MDAMB231
O94905	12	1.61717	MDAMB231 CTR	MDAMB468 CTR	Erlin-2	ERLIN2	26.548	0.0010466	0.0040149	MDAMB231-HS578t; MDAMB468-MDAMB231
Q13501	12	2.07833	MDAMB468 CTR	MDAMB231 CTR	Sequestosome-1	SQSTM1	26.474	0.0010545	0.0040253	MDAMB231-HS578t; MDAMB468-MDAMB231
P08590	5	1.80439	MDAMB468 CTR	MDAMB231 CTR	Myosin light chain 3	MYL3	26.314	0.0010719	0.0040779	MDAMB231-HS578t; MDAMB468-MDAMB231
O60343	3	5.33609	MDAMB468 CTR	MDAMB231 CTR	TBC1 domain family member 4	TBC1D4	26.111	0.0010944	0.0041258	MDAMB231-HS578t; MDAMB468-MDAMB231
Q92882	3	3.60661	MDAMB468 CTR	MDAMB231 CTR	Osteoclast-stimulating factor 1	OSTF1	26.102	0.0010955	0.0041258	MDAMB231-HS578t; MDAMB468-MDAMB231
P80188	1	2.41195	MDAMB468 CTR	MDAMB231 CTR	Neutrophil gelatinase-associated lipocalin	LCN2	26.061	0.0011001	0.0041295	MDAMB231-HS578t; MDAMB468-MDAMB231
Q12931	21	1.70031	Hs 578T CTR	MDAMB231 CTR	Heat shock protein 75 kDa_ mitochondrial	TRAP1	25.825	0.0011274	0.0041939	MDAMB231-HS578t; MDAMB468-MDAMB231
O75821	6	1.73594	Hs 578T CTR	MDAMB231 CTR	Eukaryotic translation initiation factor 3 subunit G	EIF3G	25.643	0.001149	0.0042483	MDAMB231-HS578t; MDAMB468-MDAMB231
Q9H6S3	16	1.5768	MDAMB231 CTR	Hs 578T CTR	Epidermal growth factor receptor kinase substrate 8-like protein 2	EPS8L2	25.477	0.0011692	0.0042819	MDAMB231-HS578t; MDAMB468-MDAMB231
P49459	2	1.81959	Hs 578T CTR	MDAMB231 CTR	Ubiquitin-conjugating enzyme E2 A	UBE2A	24.736	0.0012654	0.0044703	MDAMB231-HS578t; MDAMB468-MDAMB231
P10620	2	12.7591	Hs 578T CTR	MDAMB231 CTR	Microsomal glutathione S-transferase 1	MGST1	24.55	0.0012913	0.0045446	MDAMB231-HS578t; MDAMB468-MDAMB231
P62820	5	2.46197	Hs 578T CTR	MDAMB231 CTR	Ras-related protein Rab-1A	RAB1A	24.221	0.0013386	0.0046795	MDAMB231-HS578t; MDAMB468-MDAMB231
O00560	3	2.65348	MDAMB231 CTR	MDAMB468 CTR	Syntenin-1	SDCBP	23.48	0.0014542	0.0049187	MDAMB231-HS578t; MDAMB468-MDAMB231
P02533	5	2.00609	MDAMB468 CTR	MDAMB231 CTR	Keratin_ type I cytoskeletal 14	KRT14	23.439	0.0014609	0.0049263	MDAMB231-HS578t; MDAMB468-MDAMB231
Q14192	5	7.32729	Hs 578T CTR	MDAMB231 CTR	Four and a half LIM domains protein 2	FHL2	23.414	0.0014651	0.0049331	MDAMB231-HS578t; MDAMB468-MDAMB231
P51149	10	1.74291	Hs 578T CTR	MDAMB231 CTR	Ras-related protein Rab-7a	RAB7A	23.348	0.0014761	0.0049481	MDAMB231-HS578t; MDAMB468-MDAMB231
Q9NY59	2	5.74423	MDAMB468 CTR	MDAMB231 CTR	Sphingomyelin phosphodiesterase 3	SMPD3	22.919	0.0015506	0.0050894	MDAMB231-HS578t; MDAMB468-MDAMB231
P13726	5	15.4226	MDAMB231 CTR	Hs 578T CTR	Tissue factor	F3	22.916	0.0015511	0.0050894	MDAMB231-HS578t; MDAMB468-MDAMB231
Q08257	5	2.2959	Hs 578T CTR	MDAMB231 CTR	Quinone oxidoreductase	CRYZ	22.849	0.0015632	0.0051109	MDAMB231-HS578t; MDAMB468-MDAMB231
Q14320	9	1.46621	MDAMB468 CTR	MDAMB231 CTR	Protein FAM50A	FAM50A	22.811	0.0015701	0.0051208	MDAMB231-HS578t; MDAMB468-MDAMB231
Q15021	8	5.90607	MDAMB231 CTR	Hs 578T CTR	Condensin complex subunit 1	NCAPD2	22.747	0.0015819	0.005126	MDAMB231-HS578t; MDAMB468-MDAMB231
Q9Y5J9	1	19.5166	MDAMB231 CTR	Hs 578T CTR	Mitochondrial import inner membrane translocase subunit Tim8 B	TIMM8B	22.737	0.0015838	0.005126	MDAMB231-HS578t; MDAMB468-MDAMB231
Q14498	16	1.33062	MDAMB468 CTR	MDAMB231 CTR	RNA-binding protein 39	RBM39	22.237	0.0016798	0.0053602	MDAMB231-HS578t; MDAMB468-MDAMB231
O95336	11	1.59159	MDAMB468 CTR	MDAMB231 CTR	6-phosphogluconolactonase	PGLS	22.118	0.0017038	0.0054138	MDAMB231-HS578t; MDAMB468-MDAMB231
P35754	2	63.5123	MDAMB231 CTR	MDAMB468 CTR	Glutaredoxin-1	GLRX	22.06	0.0017156	0.0054437	MDAMB231-HS578t; MDAMB468-MDAMB231
Q13200	42	1.34328	MDAMB231 CTR	Hs 578T CTR	26S proteasome non-ATPase regulatory subunit 2	PSMD2	22.002	0.0017276	0.0054587	MDAMB231-HS578t; MDAMB468-MDAMB231
Q92896	5	4.62272	Hs 578T CTR	MDAMB231 CTR	Golgi apparatus protein 1	GLG1	21.981	0.001732	0.0054646	MDAMB231-HS578t; MDAMB468-MDAMB231
Q14008	23	1.5367	MDAMB231 CTR	MDAMB468 CTR	Cytoskeleton-associated protein 5	CKAP5	21.777	0.001775	0.005554	MDAMB231-HS578t; MDAMB468-MDAMB231
P49257	9	1.65132	Hs 578T CTR	MDAMB231 CTR	Protein ERGIC-53	LMAN1	21.576	0.0018191	0.00565	MDAMB231-HS578t; MDAMB468-MDAMB231
P42704	76	1.32546	MDAMB468 CTR	MDAMB231 CTR	Leucine-rich PPR motif-containing protein_ mitochondrial	LRPPRC	21.475	0.0018415	0.0056909	MDAMB231-HS578t; MDAMB468-MDAMB231
P35749	44	2.49828	Hs 578T CTR	MDAMB231 CTR	Myosin-11	MYH11	21.475	0.0018415	0.0056909	MDAMB231-HS578t; MDAMB468-MDAMB231
P07196	7	1.51634	MDAMB468 CTR	MDAMB231 CTR	Neurofilament light polypeptide	NEFL	21.071	0.001936	0.0058547	MDAMB231-HS578t; MDAMB468-MDAMB231
P06576	37	1.65489	MDAMB468 CTR	MDAMB231 CTR	ATP synthase subunit beta_ mitochondrial	ATP5F1B	20.782	0.0020074	0.0060223	MDAMB231-HS578t; MDAMB468-MDAMB231
P18859	3	1.88212	Hs 578T CTR	MDAMB231 CTR	ATP synthase-coupling factor 6_ mitochondrial	ATP5PF	20.752	0.002015	0.006029	MDAMB231-HS578t; MDAMB468-MDAMB231
P46734	3	1.84812	MDAMB231 CTR	Hs 578T CTR	Dual specificity mitogen-activated protein kinase kinase 3	MAP2K3	20.719	0.0020234	0.006046	MDAMB231-HS578t; MDAMB468-MDAMB231
P52306	9	2.41825	MDAMB231 CTR	MDAMB468 CTR	Rap1 GTPase-GDP dissociation stimulator 1	RAP1GDS1	20.692	0.0020304	0.0060589	MDAMB231-HS578t; MDAMB468-MDAMB231
Q9NSD9	22	2.10803	Hs 578T CTR	MDAMB231 CTR	Phenylalanine--tRNA ligase beta subunit	FARSB	20.646	0.0020422	0.0060781	MDAMB231-HS578t; MDAMB468-MDAMB231
O75190	3	2.14568	MDAMB231 CTR	MDAMB468 CTR	DnaJ homolog subfamily B member 6	DNAJB6	20.421	0.0021017	0.0062059	MDAMB231-HS578t; MDAMB468-MDAMB231
P09525	6	2.75761	MDAMB468 CTR	MDAMB231 CTR	Annexin A4	ANXA4	20.363	0.0021173	0.006244	MDAMB231-HS578t; MDAMB468-MDAMB231
Q9NRN7	3	1.363	MDAMB231 CTR	MDAMB468 CTR	L-aminoadipate-semialdehyde dehydrogenase-phosphopantetheinyl transferase	AASDHPPT	20.328	0.0021269	0.0062556	MDAMB231-HS578t; MDAMB468-MDAMB231
O00151	13	3.09484	Hs 578T CTR	MDAMB231 CTR	PDZ and LIM domain protein 1	PDLIM1	20.246	0.0021495	0.0063042	MDAMB231-HS578t; MDAMB468-MDAMB231
P31040	18	1.61492	Hs 578T CTR	MDAMB231 CTR	Succinate dehydrogenase [ubiquinone] flavoprotein subunit_ mitochondrial	SDHA	20.141	0.0021789	0.0063673	MDAMB231-HS578t; MDAMB468-MDAMB231
O00116	12	1.55111	Hs 578T CTR	MDAMB231 CTR	Alkyldihydroxyacetonephosphate synthase_ peroxisomal	AGPS	20.065	0.0022005	0.0064139	MDAMB231-HS578t; MDAMB468-MDAMB231
P07814	62	1.35674	MDAMB468 CTR	MDAMB231 CTR	Bifunctional glutamate/proline--tRNA ligase	EPRS1	19.821	0.0022719	0.0065736	MDAMB231-HS578t; MDAMB468-MDAMB231
P62736	1	2.06888	MDAMB231 CTR	MDAMB468 CTR	Actin_ aortic smooth muscle	ACTA2	19.818	0.0022728	0.0065736	MDAMB231-HS578t; MDAMB468-MDAMB231
Q9Y679	1	6.4248	MDAMB231 CTR	MDAMB468 CTR	Lipid droplet-regulating VLDL assembly factor AUP1	AUP1	19.578	0.0023459	0.0067506	MDAMB231-HS578t; MDAMB468-MDAMB231
P21281	14	1.44224	Hs 578T CTR	MDAMB231 CTR	V-type proton ATPase subunit B_ brain isoform	ATP6V1B2	19.393	0.0024045	0.0068492	MDAMB231-HS578t; MDAMB468-MDAMB231
P61106	10	1.69995	MDAMB231 CTR	MDAMB468 CTR	Ras-related protein Rab-14	RAB14	19.255	0.0024494	0.0069564	MDAMB231-HS578t; MDAMB468-MDAMB231
P33991	14	2.27711	MDAMB468 CTR	MDAMB231 CTR	DNA replication licensing factor MCM4	MCM4	19.21	0.0024645	0.0069672	MDAMB231-HS578t; MDAMB468-MDAMB231
P14136	13	1.69552	Hs 578T CTR	MDAMB231 CTR	Glial fibrillary acidic protein	GFAP	19.14	0.0024879	0.0070246	MDAMB231-HS578t; MDAMB468-MDAMB231
P05120	2	9.96753	MDAMB231 CTR	Hs 578T CTR	Plasminogen activator inhibitor 2	SERPINB2	19.067	0.0025127	0.0070683	MDAMB231-HS578t; MDAMB468-MDAMB231
Q8TAA3	3	1.34017	MDAMB468 CTR	MDAMB231 CTR	Proteasome subunit alpha-type 8	PSMA8	18.815	0.0026008	0.0072706	MDAMB231-HS578t; MDAMB468-MDAMB231
Q13217	4	1.51384	MDAMB468 CTR	MDAMB231 CTR	DnaJ homolog subfamily C member 3	DNAJC3	18.658	0.0026577	0.0074112	MDAMB231-HS578t; MDAMB468-MDAMB231
Q9NRR5	4	1.688	MDAMB468 CTR	MDAMB231 CTR	Ubiquilin-4	UBQLN4	18.63	0.0026681	0.007431	MDAMB231-HS578t; MDAMB468-MDAMB231
Q9Y295	6	1.66441	Hs 578T CTR	MDAMB231 CTR	Developmentally-regulated GTP-binding protein 1	DRG1	18.377	0.0027639	0.0076319	MDAMB231-HS578t; MDAMB468-MDAMB231
P27635	13	1.25178	MDAMB468 CTR	MDAMB231 CTR	60S ribosomal protein L10	RPL10	18.287	0.0027989	0.0076911	MDAMB231-HS578t; MDAMB468-MDAMB231
Q53GQ0	9	1.73831	Hs 578T CTR	MDAMB231 CTR	Very-long-chain 3-oxoacyl-CoA reductase	HSD17B12	18.147	0.0028552	0.0077982	MDAMB231-HS578t; MDAMB468-MDAMB231
Q9BVG4	6	1.82939	MDAMB231 CTR	Hs 578T CTR	Protein PBDC1	PBDC1	18.102	0.0028732	0.007836	MDAMB231-HS578t; MDAMB468-MDAMB231
P37837	17	1.33236	MDAMB468 CTR	MDAMB231 CTR	Transaldolase	TALDO1	18.063	0.0028895	0.0078539	MDAMB231-HS578t; MDAMB468-MDAMB231
Q92890	5	1.8146	Hs 578T CTR	MDAMB231 CTR	Ubiquitin recognition factor in ER-associated degradation protein 1	UFD1	18.052	0.0028941	0.0078569	MDAMB231-HS578t; MDAMB468-MDAMB231
Q9P2T1	1	3.6981	MDAMB231 CTR	MDAMB468 CTR	GMP reductase 2	GMPR2	17.936	0.0029421	0.0079301	MDAMB231-HS578t; MDAMB468-MDAMB231
P51571	5	1.95711	MDAMB468 CTR	MDAMB231 CTR	Translocon-associated protein subunit delta	SSR4	17.744	0.0030248	0.0081018	MDAMB231-HS578t; MDAMB468-MDAMB231
Q9UNN5	1	1.99771	MDAMB468 CTR	MDAMB231 CTR	FAS-associated factor 1	FAF1	17.509	0.0031299	0.0082586	MDAMB231-HS578t; MDAMB468-MDAMB231
O43504	1	2.26357	Hs 578T CTR	MDAMB231 CTR	Ragulator complex protein LAMTOR5	LAMTOR5	17.381	0.0031893	0.0083761	MDAMB231-HS578t; MDAMB468-MDAMB231
P49748	7	1.56719	Hs 578T CTR	MDAMB231 CTR	Very long-chain specific acyl-CoA dehydrogenase_ mitochondrial	ACADVL	17.352	0.0032028	0.0083921	MDAMB231-HS578t; MDAMB468-MDAMB231
P16152	8	1.80312	MDAMB468 CTR	MDAMB231 CTR	Carbonyl reductase [NADPH] 1	CBR1	17.314	0.003221	0.0084186	MDAMB231-HS578t; MDAMB468-MDAMB231
P06753	4	1.59537	MDAMB468 CTR	MDAMB231 CTR	Tropomyosin alpha-3 chain	TPM3	17.295	0.0032298	0.0084237	MDAMB231-HS578t; MDAMB468-MDAMB231
P62328	4	1.99557	MDAMB231 CTR	MDAMB468 CTR	Thymosin beta-4	TMSB4X	17.155	0.0032975	0.0085705	MDAMB231-HS578t; MDAMB468-MDAMB231
P33992	18	1.90271	MDAMB468 CTR	MDAMB231 CTR	DNA replication licensing factor MCM5	MCM5	17.088	0.0033308	0.0086372	MDAMB231-HS578t; MDAMB468-MDAMB231
P62263	10	1.47849	Hs 578T CTR	MDAMB231 CTR	40S ribosomal protein S14	RPS14	16.685	0.0035396	0.0090612	MDAMB231-HS578t; MDAMB468-MDAMB231
Q7RTR0	3	1.23694	MDAMB468 CTR	MDAMB231 CTR	NACHT_ LRR and PYD domains-containing protein 9	NLRP9	16.639	0.0035644	0.0091012	MDAMB231-HS578t; MDAMB468-MDAMB231
P07942	6	2.4128	MDAMB468 CTR	MDAMB231 CTR	Laminin subunit beta-1	LAMB1	16.636	0.0035663	0.0091012	MDAMB231-HS578t; MDAMB468-MDAMB231
Q1KMD3	27	1.5445	Hs 578T CTR	MDAMB231 CTR	Heterogeneous nuclear ribonucleoprotein U-like protein 2	HNRNPUL2	16.578	0.0035978	0.0091302	MDAMB231-HS578t; MDAMB468-MDAMB231
Q8N0Y7	2	2.96814	MDAMB231 CTR	MDAMB468 CTR	Probable phosphoglycerate mutase 4	PGAM4	16.438	0.0036764	0.0092669	MDAMB231-HS578t; MDAMB468-MDAMB231
P67809	15	1.70803	Hs 578T CTR	MDAMB231 CTR	Y-box-binding protein 1	YBX1	16.197	0.0038165	0.0095349	MDAMB231-HS578t; MDAMB468-MDAMB231
Q8WVM8	5	1.89268	MDAMB231 CTR	Hs 578T CTR	Sec1 family domain-containing protein 1	SCFD1	15.967	0.0039567	0.0098308	MDAMB231-HS578t; MDAMB468-MDAMB231
Q9NRW1	1	2.00697	Hs 578T CTR	MDAMB231 CTR	Ras-related protein Rab-6B	RAB6B	15.944	0.0039714	0.0098456	MDAMB231-HS578t; MDAMB468-MDAMB231
P12955	9	1.23887	MDAMB231 CTR	MDAMB468 CTR	Xaa-Pro dipeptidase	PEPD	15.524	0.0042478	0.01036	MDAMB231-HS578t; MDAMB468-MDAMB231
Q9H853	3	2.43286	Hs 578T CTR	MDAMB231 CTR	Putative tubulin-like protein alpha-4B	TUBA4B	15.442	0.0043045	0.010476	MDAMB231-HS578t; MDAMB468-MDAMB231
Q6IQ22	6	1.49905	Hs 578T CTR	MDAMB231 CTR	Ras-related protein Rab-12	RAB12	15.43	0.0043132	0.010482	MDAMB231-HS578t; MDAMB468-MDAMB231
Q13724	5	2.10176	MDAMB231 CTR	MDAMB468 CTR	Mannosyl-oligosaccharide glucosidase	MOGS	15.265	0.0044309	0.010674	MDAMB231-HS578t; MDAMB468-MDAMB231
O95793	4	2.56863	MDAMB468 CTR	MDAMB231 CTR	Double-stranded RNA-binding protein Staufen homolog 1	STAU1	15.173	0.0044983	0.010762	MDAMB231-HS578t; MDAMB468-MDAMB231
Q16629	5	1.67749	MDAMB468 CTR	MDAMB231 CTR	Serine/arginine-rich splicing factor 7	SRSF7	15.089	0.0045619	0.010879	MDAMB231-HS578t; MDAMB468-MDAMB231
Q9BXY0	2	3.07966	Hs 578T CTR	MDAMB231 CTR	Protein MAK16 homolog	MAK16	15.074	0.0045731	0.010883	MDAMB231-HS578t; MDAMB468-MDAMB231
Q14566	17	1.43375	Hs 578T CTR	MDAMB231 CTR	DNA replication licensing factor MCM6	MCM6	15.01	0.0046219	0.010987	MDAMB231-HS578t; MDAMB468-MDAMB231
P49736	9	1.66504	Hs 578T CTR	MDAMB231 CTR	DNA replication licensing factor MCM2	MCM2	14.977	0.0046473	0.011013	MDAMB231-HS578t; MDAMB468-MDAMB231
Q9UJ70	1	3.7437	Hs 578T CTR	MDAMB231 CTR	N-acetyl-D-glucosamine kinase	NAGK	14.964	0.0046576	0.011016	MDAMB231-HS578t; MDAMB468-MDAMB231
Q9NRV9	2	23.9937	MDAMB231 CTR	Hs 578T CTR	Heme-binding protein 1	HEBP1	14.845	0.0047513	0.011189	MDAMB231-HS578t; MDAMB468-MDAMB231
Q06830	22	1.74688	Hs 578T CTR	MDAMB231 CTR	Peroxiredoxin-1	PRDX1	14.689	0.0048785	0.01137	MDAMB231-HS578t; MDAMB468-MDAMB231
Q9NVI7	9	1.38414	MDAMB231 CTR	MDAMB468 CTR	ATPase family AAA domain-containing protein 3A	ATAD3A	14.565	0.0049818	0.011546	MDAMB231-HS578t; MDAMB468-MDAMB231
P21964	8	2.34437	MDAMB468 CTR	MDAMB231 CTR	Catechol O-methyltransferase	COMT	14.352	0.0051676	0.011848	MDAMB231-HS578t; MDAMB468-MDAMB231
Q6UW68	3	1.69706	Hs 578T CTR	MDAMB231 CTR	Transmembrane protein 205	TMEM205	14.295	0.0052189	0.011941	MDAMB231-HS578t; MDAMB468-MDAMB231
P14923	3	8.1651	MDAMB468 CTR	MDAMB231 CTR	Junction plakoglobin	JUP	14.267	0.0052445	0.011972	MDAMB231-HS578t; MDAMB468-MDAMB231
Q9UBN7	2	23.2486	MDAMB231 CTR	Hs 578T CTR	Histone deacetylase 6	HDAC6	14.263	0.0052483	0.011972	MDAMB231-HS578t; MDAMB468-MDAMB231
Q8IXL7	1	1.53845	MDAMB468 CTR	MDAMB231 CTR	Methionine-R-sulfoxide reductase B3	MSRB3	14.141	0.0053608	0.012196	MDAMB231-HS578t; MDAMB468-MDAMB231
P13489	19	2.07005	Hs 578T CTR	MDAMB468 CTR	Ribonuclease inhibitor	RNH1	17.33	0.0032132	0.0084096	MDAMB468-HS578t
Q3V6T2	5	1.77298	Hs 578T CTR	MDAMB468 CTR	Girdin	CCDC88A	16.681	0.0035417	0.0090612	MDAMB468-HS578t
P61586	11	1.61697	Hs 578T CTR	MDAMB468 CTR	Transforming protein RhoA	RHOA	16.62	0.0035749	0.0091026	MDAMB468-HS578t
O75506	2	34.9415	Hs 578T CTR	MDAMB468 CTR	Heat shock factor-binding protein 1	HSBP1	15.262	0.0044332	0.010674	MDAMB468-HS578t
Q14194	2	2.85082	Hs 578T CTR	MDAMB468 CTR	Dihydropyrimidinase-related protein 1	CRMP1	14.542	0.0050017	0.011573	MDAMB468-HS578t
Q6PJF5	1	3.7795	MDAMB468 CTR	Hs 578T CTR	Inactive rhomboid protein 2	RHBDF2	14.417	0.0051102	0.011788	MDAMB468-HS578t
Q15771	3	3.12585	MDAMB468 CTR	Hs 578T CTR	Ras-related protein Rab-30	RAB30	14.128	0.0053734	0.012196	MDAMB468-HS578t
Q16719	6	58.4444	MDAMB468 CTR	MDAMB231 CTR	Kynureninase	KYNU	800.1	5.2125e-08	2.1213e-05	MDAMB468-HS578t; MDAMB468-MDAMB231
P52895	3	14.6838	MDAMB468 CTR	Hs 578T CTR	Aldo-keto reductase family 1 member C2	AKR1C2	502.21	2.0938e-07	5.2485e-05	MDAMB468-HS578t; MDAMB468-MDAMB231
Q16822	6	2.99399	MDAMB468 CTR	MDAMB231 CTR	Phosphoenolpyruvate carboxykinase [GTP]_ mitochondrial	PCK2	316.23	8.2996e-07	8.3173e-05	MDAMB468-HS578t; MDAMB468-MDAMB231
Q15392	9	2.45991	MDAMB468 CTR	MDAMB231 CTR	Delta(24)-sterol reductase	DHCR24	290.86	1.0641e-06	9.5104e-05	MDAMB468-HS578t; MDAMB468-MDAMB231
P29373	11	20.638	MDAMB468 CTR	MDAMB231 CTR	Cellular retinoic acid-binding protein 2	CRABP2	287.97	1.0961e-06	9.5104e-05	MDAMB468-HS578t; MDAMB468-MDAMB231
P09455	4	14.2703	MDAMB468 CTR	MDAMB231 CTR	Retinol-binding protein 1	RBP1	246.67	1.7348e-06	0.00012366	MDAMB468-HS578t; MDAMB468-MDAMB231
Q9Y6E0	5	1.88659	MDAMB468 CTR	MDAMB231 CTR	Serine/threonine-protein kinase 24	STK24	210.7	2.7666e-06	0.0001396	MDAMB468-HS578t; MDAMB468-MDAMB231
Q9NS86	15	16.6885	MDAMB468 CTR	Hs 578T CTR	LanC-like protein 2	LANCL2	170.74	5.1482e-06	0.00018025	MDAMB468-HS578t; MDAMB468-MDAMB231
Q02818	6	1.63636	Hs 578T CTR	MDAMB468 CTR	Nucleobindin-1	NUCB1	156.62	6.6393e-06	0.00020708	MDAMB468-HS578t; MDAMB468-MDAMB231
P08574	4	2.14299	Hs 578T CTR	MDAMB468 CTR	Cytochrome c1_ heme protein_ mitochondrial	CYC1	154.64	6.8917e-06	0.00020996	MDAMB468-HS578t; MDAMB468-MDAMB231
P21926	1	2.92161	Hs 578T CTR	MDAMB468 CTR	CD9 antigen	CD9	147.35	7.9436e-06	0.00022124	MDAMB468-HS578t; MDAMB468-MDAMB231
P06702	8	11.4636	MDAMB468 CTR	Hs 578T CTR	Protein S100-A9	S100A9	143.27	8.6286e-06	0.00022901	MDAMB468-HS578t; MDAMB468-MDAMB231
Q9BR76	8	2.40595	MDAMB468 CTR	Hs 578T CTR	Coronin-1B	CORO1B	139.65	9.301e-06	0.00023358	MDAMB468-HS578t; MDAMB468-MDAMB231
Q9Y6E2	5	3.37447	MDAMB468 CTR	Hs 578T CTR	Basic leucine zipper and W2 domain-containing protein 2	BZW2	136.39	9.9687e-06	0.00023673	MDAMB468-HS578t; MDAMB468-MDAMB231
P31151	4	18.072	MDAMB468 CTR	MDAMB231 CTR	Protein S100-A7	S100A7	132.33	1.0894e-05	0.00023861	MDAMB468-HS578t; MDAMB468-MDAMB231
Q04695	20	4.76452	MDAMB468 CTR	MDAMB231 CTR	Keratin_ type I cytoskeletal 17	KRT17	129.97	1.1483e-05	0.00024259	MDAMB468-HS578t; MDAMB468-MDAMB231
Q96FQ6	6	3.3316	MDAMB468 CTR	Hs 578T CTR	Protein S100-A16	S100A16	122.13	1.3779e-05	0.00027224	MDAMB468-HS578t; MDAMB468-MDAMB231
Q96S97	4	5.15533	Hs 578T CTR	MDAMB468 CTR	Myeloid-associated differentiation marker	MYADM	121.48	1.3998e-05	0.00027224	MDAMB468-HS578t; MDAMB468-MDAMB231
P53602	5	3.40228	MDAMB468 CTR	MDAMB231 CTR	Diphosphomevalonate decarboxylase	MVD	120.71	1.4263e-05	0.00027501	MDAMB468-HS578t; MDAMB468-MDAMB231
Q96HC4	20	2.23856	Hs 578T CTR	MDAMB468 CTR	PDZ and LIM domain protein 5	PDLIM5	102.89	2.2741e-05	0.00038866	MDAMB468-HS578t; MDAMB468-MDAMB231
O15173	5	2.46375	MDAMB231 CTR	MDAMB468 CTR	Membrane-associated progesterone receptor component 2	PGRMC2	101.93	2.3369e-05	0.00039344	MDAMB468-HS578t; MDAMB468-MDAMB231
P80723	9	19.8718	Hs 578T CTR	MDAMB468 CTR	Brain acid soluble protein 1	BASP1	100.83	2.4121e-05	0.00040012	MDAMB468-HS578t; MDAMB468-MDAMB231
Q99798	24	1.41144	MDAMB468 CTR	Hs 578T CTR	Aconitate hydratase_ mitochondrial	ACO2	99.512	2.5064e-05	0.00040974	MDAMB468-HS578t; MDAMB468-MDAMB231
O75223	5	2.30384	MDAMB468 CTR	Hs 578T CTR	Gamma-glutamylcyclotransferase	GGCT	96.608	2.732e-05	0.00042937	MDAMB468-HS578t; MDAMB468-MDAMB231
P25311	3	66.241	MDAMB468 CTR	Hs 578T CTR	Zinc-alpha-2-glycoprotein	AZGP1	93.614	2.994e-05	0.00044437	MDAMB468-HS578t; MDAMB468-MDAMB231
P53701	2	3.86878	MDAMB468 CTR	Hs 578T CTR	Holocytochrome c-type synthase	HCCS	92.105	3.1387e-05	0.00045683	MDAMB468-HS578t; MDAMB468-MDAMB231
Q9UBM7	5	9.28925	MDAMB468 CTR	MDAMB231 CTR	7-dehydrocholesterol reductase	DHCR7	87.885	3.5966e-05	0.00047729	MDAMB468-HS578t; MDAMB468-MDAMB231
P20700	35	1.80727	MDAMB468 CTR	MDAMB231 CTR	Lamin-B1	LMNB1	85.204	3.9346e-05	0.00049631	MDAMB468-HS578t; MDAMB468-MDAMB231
O15347	7	2.85471	MDAMB468 CTR	Hs 578T CTR	High mobility group protein B3	HMGB3	85.015	3.9599e-05	0.00049631	MDAMB468-HS578t; MDAMB468-MDAMB231
Q01469	6	3.38084	Hs 578T CTR	MDAMB468 CTR	Fatty acid-binding protein 5	FABP5	77.729	5.1318e-05	0.00058768	MDAMB468-HS578t; MDAMB468-MDAMB231
P35613	7	2.58435	Hs 578T CTR	MDAMB468 CTR	Basigin	BSG	74.03	5.9072e-05	0.00064692	MDAMB468-HS578t; MDAMB468-MDAMB231
Q9NPH2	7	77.6741	MDAMB468 CTR	MDAMB231 CTR	Inositol-3-phosphate synthase 1	ISYNA1	68.063	7.5236e-05	0.00074444	MDAMB468-HS578t; MDAMB468-MDAMB231
Q9UBF2	17	2.90137	MDAMB468 CTR	MDAMB231 CTR	Coatomer subunit gamma-2	COPG2	66.69	7.9771e-05	0.00077448	MDAMB468-HS578t; MDAMB468-MDAMB231
Q09161	7	2.3189	MDAMB468 CTR	Hs 578T CTR	Nuclear cap-binding protein subunit 1	NCBP1	64.78	8.6708e-05	0.00082537	MDAMB468-HS578t; MDAMB468-MDAMB231
Q9Y5P6	2	2.83764	MDAMB231 CTR	MDAMB468 CTR	Mannose-1-phosphate guanyltransferase beta	GMPPB	64.151	8.9167e-05	0.00084168	MDAMB468-HS578t; MDAMB468-MDAMB231
Q14444	13	1.98207	MDAMB468 CTR	Hs 578T CTR	Caprin-1	CAPRIN1	63.443	9.2047e-05	0.00085542	MDAMB468-HS578t; MDAMB468-MDAMB231
Q16222	14	2.11656	Hs 578T CTR	MDAMB468 CTR	UDP-N-acetylhexosamine pyrophosphorylase	UAP1	62.748	9.5e-05	0.0008722	MDAMB468-HS578t; MDAMB468-MDAMB231
Q58FG1	3	2.10005	Hs 578T CTR	MDAMB468 CTR	Putative heat shock protein HSP 90-alpha A4	HSP90AA4P	62.288	9.702e-05	0.00088292	MDAMB468-HS578t; MDAMB468-MDAMB231
Q8IVM0	2	10.4281	Hs 578T CTR	MDAMB468 CTR	Coiled-coil domain-containing protein 50	CCDC50	59.169	0.00011237	0.00097831	MDAMB468-HS578t; MDAMB468-MDAMB231
O15382	7	2.69118	MDAMB231 CTR	MDAMB468 CTR	Branched-chain-amino-acid aminotransferase_ mitochondrial	BCAT2	59.086	0.00011282	0.00097831	MDAMB468-HS578t; MDAMB468-MDAMB231
Q9BX68	3	3.50287	MDAMB468 CTR	Hs 578T CTR	Adenosine 5'-monophosphoramidase HINT2	HINT2	59.02	0.00011318	0.00097831	MDAMB468-HS578t; MDAMB468-MDAMB231
Q9BUJ2	21	1.43592	MDAMB468 CTR	Hs 578T CTR	Heterogeneous nuclear ribonucleoprotein U-like protein 1	HNRNPUL1	58.586	0.00011559	0.00099153	MDAMB468-HS578t; MDAMB468-MDAMB231
Q8NE71	12	1.94719	MDAMB468 CTR	Hs 578T CTR	ATP-binding cassette sub-family F member 1	ABCF1	57.964	0.00011916	0.0010106	MDAMB468-HS578t; MDAMB468-MDAMB231
P50453	5	4.96373	MDAMB231 CTR	MDAMB468 CTR	Serpin B9	SERPINB9	57.627	0.00012116	0.0010161	MDAMB468-HS578t; MDAMB468-MDAMB231
Q9NZN3	2	1.63856	MDAMB468 CTR	Hs 578T CTR	EH domain-containing protein 3	EHD3	53.298	0.00015132	0.0011895	MDAMB468-HS578t; MDAMB468-MDAMB231
Q70Z53	1	2.58554	Hs 578T CTR	MDAMB468 CTR	Protein FRA10AC1	FRA10AC1	53.052	0.00015332	0.0011969	MDAMB468-HS578t; MDAMB468-MDAMB231
Q14699	4	41.4377	Hs 578T CTR	MDAMB468 CTR	Raftlin	RFTN1	52.549	0.00015752	0.0012138	MDAMB468-HS578t; MDAMB468-MDAMB231
P18077	1	1.6989	Hs 578T CTR	MDAMB468 CTR	60S ribosomal protein L35a	RPL35A	51.962	0.00016262	0.0012322	MDAMB468-HS578t; MDAMB468-MDAMB231
O14732	5	1.83711	MDAMB468 CTR	MDAMB231 CTR	Inositol monophosphatase 2	IMPA2	51.576	0.0001661	0.0012491	MDAMB468-HS578t; MDAMB468-MDAMB231
O43583	3	1.99857	MDAMB468 CTR	MDAMB231 CTR	Density-regulated protein	DENR	50.756	0.00017381	0.0012899	MDAMB468-HS578t; MDAMB468-MDAMB231
P53370	1	3.67627	MDAMB468 CTR	Hs 578T CTR	Nucleoside diphosphate-linked moiety X motif 6	NUDT6	50.639	0.00017495	0.001294	MDAMB468-HS578t; MDAMB468-MDAMB231
P42892	1	13.4902	MDAMB231 CTR	MDAMB468 CTR	Endothelin-converting enzyme 1	ECE1	50.209	0.00017923	0.0013128	MDAMB468-HS578t; MDAMB468-MDAMB231
O94992	4	3.29877	MDAMB231 CTR	MDAMB468 CTR	Protein HEXIM1	HEXIM1	47.603	0.00020838	0.0014367	MDAMB468-HS578t; MDAMB468-MDAMB231
Q2TAY7	3	1.92054	Hs 578T CTR	MDAMB468 CTR	WD40 repeat-containing protein SMU1	SMU1	46.348	0.00022468	0.0015005	MDAMB468-HS578t; MDAMB468-MDAMB231
Q9NZA1	5	2.41817	Hs 578T CTR	MDAMB468 CTR	Chloride intracellular channel protein 5	CLIC5	45.524	0.00023631	0.0015429	MDAMB468-HS578t; MDAMB468-MDAMB231
A0A0B4J2D5	5	9.53154	MDAMB468 CTR	Hs 578T CTR	Putative glutamine amidotransferase-like class 1 domain-containing protein 3B_ mitochondrial	GATD3B	45.41	0.00023799	0.0015473	MDAMB468-HS578t; MDAMB468-MDAMB231
P48681	7	2.00313	MDAMB468 CTR	MDAMB231 CTR	Nestin	NES	44.848	0.00024647	0.0015752	MDAMB468-HS578t; MDAMB468-MDAMB231
Q9Y3C8	1	4.18432	MDAMB468 CTR	MDAMB231 CTR	Ubiquitin-fold modifier-conjugating enzyme 1	UFC1	42.677	0.00028332	0.001728	MDAMB468-HS578t; MDAMB468-MDAMB231
P30046	5	1.85991	MDAMB468 CTR	Hs 578T CTR	D-dopachrome decarboxylase	DDT	42.002	0.00029626	0.0017707	MDAMB468-HS578t; MDAMB468-MDAMB231
Q16543	20	1.94523	MDAMB468 CTR	Hs 578T CTR	Hsp90 co-chaperone Cdc37	CDC37	41.982	0.00029665	0.0017707	MDAMB468-HS578t; MDAMB468-MDAMB231
Q99614	4	2.14075	MDAMB468 CTR	MDAMB231 CTR	Tetratricopeptide repeat protein 1	TTC1	41.667	0.00030298	0.0017987	MDAMB468-HS578t; MDAMB468-MDAMB231
Q13492	8	2.65317	Hs 578T CTR	MDAMB468 CTR	Phosphatidylinositol-binding clathrin assembly protein	PICALM	40.992	0.00031713	0.0018448	MDAMB468-HS578t; MDAMB468-MDAMB231
Q12906	35	1.70786	MDAMB468 CTR	Hs 578T CTR	Interleukin enhancer-binding factor 3	ILF3	40.985	0.00031728	0.0018448	MDAMB468-HS578t; MDAMB468-MDAMB231
O14929	5	3.89765	MDAMB468 CTR	MDAMB231 CTR	Histone acetyltransferase type B catalytic subunit	HAT1	40.486	0.00032834	0.0018848	MDAMB468-HS578t; MDAMB468-MDAMB231
Q96N66	6	10.9193	MDAMB231 CTR	MDAMB468 CTR	Lysophospholipid acyltransferase 7	MBOAT7	40.357	0.00033127	0.0018872	MDAMB468-HS578t; MDAMB468-MDAMB231
Q9NZ01	7	1.66709	MDAMB468 CTR	Hs 578T CTR	Very-long-chain enoyl-CoA reductase	TECR	39.681	0.00034727	0.0019593	MDAMB468-HS578t; MDAMB468-MDAMB231
Q15436	15	2.99598	Hs 578T CTR	MDAMB468 CTR	Protein transport protein Sec23A	SEC23A	39.676	0.00034739	0.0019593	MDAMB468-HS578t; MDAMB468-MDAMB231
Q86Y82	2	3.94757	Hs 578T CTR	MDAMB468 CTR	Syntaxin-12	STX12	39.56	0.00035023	0.0019606	MDAMB468-HS578t; MDAMB468-MDAMB231
Q13526	3	3.12591	MDAMB468 CTR	MDAMB231 CTR	Peptidyl-prolyl cis-trans isomerase NIMA-interacting 1	PIN1	39.159	0.00036032	0.0020022	MDAMB468-HS578t; MDAMB468-MDAMB231
P06703	7	1.96382	MDAMB231 CTR	MDAMB468 CTR	Protein S100-A6	S100A6	37.471	0.00040731	0.0021983	MDAMB468-HS578t; MDAMB468-MDAMB231
O75828	1	6.12331	Hs 578T CTR	MDAMB468 CTR	Carbonyl reductase [NADPH] 3	CBR3	36.119	0.00045104	0.00235	MDAMB468-HS578t; MDAMB468-MDAMB231
P21399	23	1.48381	Hs 578T CTR	MDAMB468 CTR	Cytoplasmic aconitate hydratase	ACO1	35.341	0.00047905	0.0024483	MDAMB468-HS578t; MDAMB468-MDAMB231
Q15365	16	1.6466	MDAMB468 CTR	Hs 578T CTR	Poly(rC)-binding protein 1	PCBP1	34.748	0.00050199	0.0025335	MDAMB468-HS578t; MDAMB468-MDAMB231
Q9Y3Y2	2	1.87307	MDAMB468 CTR	MDAMB231 CTR	Chromatin target of PRMT1 protein	CHTOP	34.626	0.00050688	0.0025463	MDAMB468-HS578t; MDAMB468-MDAMB231
P84085	2	3.64049	Hs 578T CTR	MDAMB468 CTR	ADP-ribosylation factor 5	ARF5	34.522	0.00051111	0.0025463	MDAMB468-HS578t; MDAMB468-MDAMB231
P14324	15	2.02354	MDAMB468 CTR	MDAMB231 CTR	Farnesyl pyrophosphate synthase	FDPS	34.251	0.00052235	0.0025752	MDAMB468-HS578t; MDAMB468-MDAMB231
Q92901	1	2.35068	MDAMB468 CTR	Hs 578T CTR	60S ribosomal protein L3-like	RPL3L	34.202	0.00052438	0.0025752	MDAMB468-HS578t; MDAMB468-MDAMB231
P32119	14	2.48808	MDAMB468 CTR	Hs 578T CTR	Peroxiredoxin-2	PRDX2	34.186	0.00052509	0.0025752	MDAMB468-HS578t; MDAMB468-MDAMB231
Q8TD30	1	72.118	MDAMB231 CTR	MDAMB468 CTR	Alanine aminotransferase 2	GPT2	33.858	0.00053923	0.0026218	MDAMB468-HS578t; MDAMB468-MDAMB231
Q6GMV3	2	2.01001	MDAMB468 CTR	MDAMB231 CTR	Putative peptidyl-tRNA hydrolase PTRHD1	PTRHD1	33.709	0.00054583	0.0026368	MDAMB468-HS578t; MDAMB468-MDAMB231
P12004	21	2.00315	MDAMB468 CTR	MDAMB231 CTR	Proliferating cell nuclear antigen	PCNA	33.547	0.00055308	0.0026548	MDAMB468-HS578t; MDAMB468-MDAMB231
Q13045	6	1.73629	Hs 578T CTR	MDAMB468 CTR	Protein flightless-1 homolog	FLII	32.842	0.00058638	0.0027791	MDAMB468-HS578t; MDAMB468-MDAMB231
P19013	16	2.59127	MDAMB468 CTR	MDAMB231 CTR	Keratin_ type II cytoskeletal 4	KRT4	32.65	0.0005959	0.0028066	MDAMB468-HS578t; MDAMB468-MDAMB231
O75718	4	2.0058	MDAMB468 CTR	MDAMB231 CTR	Cartilage-associated protein	CRTAP	32.563	0.00060031	0.0028215	MDAMB468-HS578t; MDAMB468-MDAMB231
P38159	26	1.69807	MDAMB468 CTR	MDAMB231 CTR	RNA-binding motif protein_ X chromosome	RBMX	32.475	0.00060476	0.0028306	MDAMB468-HS578t; MDAMB468-MDAMB231
Q8TAV0	1	1.75589	MDAMB468 CTR	MDAMB231 CTR	Protein FAM76A	FAM76A	32.206	0.00061874	0.0028663	MDAMB468-HS578t; MDAMB468-MDAMB231
O60234	1	2.12113	MDAMB468 CTR	Hs 578T CTR	Glia maturation factor gamma	GMFG	32.058	0.00062661	0.0028908	MDAMB468-HS578t; MDAMB468-MDAMB231
Q12765	6	2.48792	Hs 578T CTR	MDAMB468 CTR	Secernin-1	SCRN1	31.458	0.0006599	0.0030068	MDAMB468-HS578t; MDAMB468-MDAMB231
Q15738	12	1.6867	MDAMB468 CTR	Hs 578T CTR	Sterol-4-alpha-carboxylate 3-dehydrogenase_ decarboxylating	NSDHL	31.236	0.00067285	0.0030476	MDAMB468-HS578t; MDAMB468-MDAMB231
Q02880	4	2.66289	MDAMB468 CTR	Hs 578T CTR	DNA topoisomerase 2-beta	TOP2B	30.782	0.00070036	0.0031349	MDAMB468-HS578t; MDAMB468-MDAMB231
Q58FF6	5	2.06169	MDAMB468 CTR	Hs 578T CTR	Putative heat shock protein HSP 90-beta 4	HSP90AB4P	30.674	0.0007071	0.0031582	MDAMB468-HS578t; MDAMB468-MDAMB231
Q9Y262	14	1.64743	MDAMB468 CTR	Hs 578T CTR	Eukaryotic translation initiation factor 3 subunit L	EIF3L	30.542	0.00071548	0.0031647	MDAMB468-HS578t; MDAMB468-MDAMB231
Q9P289	1	5.81689	MDAMB468 CTR	Hs 578T CTR	Serine/threonine-protein kinase 26	STK26	30.313	0.00073036	0.0031994	MDAMB468-HS578t; MDAMB468-MDAMB231
P49006	6	2.38553	MDAMB468 CTR	Hs 578T CTR	MARCKS-related protein	MARCKSL1	29.544	0.00078337	0.0033608	MDAMB468-HS578t; MDAMB468-MDAMB231
Q9UBT2	16	1.40448	MDAMB468 CTR	Hs 578T CTR	SUMO-activating enzyme subunit 2	UBA2	29.371	0.00079599	0.0033849	MDAMB468-HS578t; MDAMB468-MDAMB231
Q9BVM2	1	62.7893	Hs 578T CTR	MDAMB468 CTR	Protein DPCD	DPCD	29.194	0.00080916	0.0034013	MDAMB468-HS578t; MDAMB468-MDAMB231
Q14847	14	1.66973	MDAMB231 CTR	MDAMB468 CTR	LIM and SH3 domain protein 1	LASP1	29.124	0.00081444	0.0034152	MDAMB468-HS578t; MDAMB468-MDAMB231
P09104	12	2.35465	MDAMB231 CTR	MDAMB468 CTR	Gamma-enolase	ENO2	28.875	0.00083371	0.0034574	MDAMB468-HS578t; MDAMB468-MDAMB231
Q14254	4	1.84578	Hs 578T CTR	MDAMB468 CTR	Flotillin-2	FLOT2	28.129	0.00089508	0.0036481	MDAMB468-HS578t; MDAMB468-MDAMB231
Q13442	3	1.53026	MDAMB468 CTR	MDAMB231 CTR	28 kDa heat- and acid-stable phosphoprotein	PDAP1	28.12	0.00089585	0.0036481	MDAMB468-HS578t; MDAMB468-MDAMB231
P62333	23	1.48525	MDAMB468 CTR	Hs 578T CTR	26S proteasome regulatory subunit 10B	PSMC6	27.758	0.00092783	0.0037113	MDAMB468-HS578t; MDAMB468-MDAMB231
P05198	13	1.70071	MDAMB468 CTR	Hs 578T CTR	Eukaryotic translation initiation factor 2 subunit 1	EIF2S1	27.21	0.00097933	0.0038693	MDAMB468-HS578t; MDAMB468-MDAMB231
Q16531	25	1.56297	MDAMB468 CTR	Hs 578T CTR	DNA damage-binding protein 1	DDB1	26.87	0.0010131	0.0039515	MDAMB468-HS578t; MDAMB468-MDAMB231
Q9GZT3	4	1.88768	MDAMB468 CTR	MDAMB231 CTR	SRA stem-loop-interacting RNA-binding protein_ mitochondrial	SLIRP	26.834	0.0010168	0.0039515	MDAMB468-HS578t; MDAMB468-MDAMB231
Q3KP22	1	2.58838	Hs 578T CTR	MDAMB468 CTR	Membrane-anchored junction protein	MAJIN	26.653	0.0010355	0.0039865	MDAMB468-HS578t; MDAMB468-MDAMB231
Q9BWJ5	1	1.84788	MDAMB468 CTR	Hs 578T CTR	Splicing factor 3B subunit 5	SF3B5	26.182	0.0010865	0.0041198	MDAMB468-HS578t; MDAMB468-MDAMB231
P40429	10	1.73455	MDAMB468 CTR	MDAMB231 CTR	60S ribosomal protein L13a	RPL13A	26.171	0.0010876	0.0041198	MDAMB468-HS578t; MDAMB468-MDAMB231
O00170	5	1.55271	MDAMB468 CTR	MDAMB231 CTR	AH receptor-interacting protein	AIP	26.165	0.0010884	0.0041198	MDAMB468-HS578t; MDAMB468-MDAMB231
Q9UN86	11	1.37816	Hs 578T CTR	MDAMB468 CTR	Ras GTPase-activating protein-binding protein 2	G3BP2	26.128	0.0010925	0.0041258	MDAMB468-HS578t; MDAMB468-MDAMB231
P17844	16	1.43092	MDAMB468 CTR	Hs 578T CTR	Probable ATP-dependent RNA helicase DDX5	DDX5	26.035	0.0011031	0.0041338	MDAMB468-HS578t; MDAMB468-MDAMB231
Q9BWM7	7	2.71289	Hs 578T CTR	MDAMB468 CTR	Sideroflexin-3	SFXN3	25.961	0.0011115	0.0041574	MDAMB468-HS578t; MDAMB468-MDAMB231
O75400	2	2.04115	MDAMB468 CTR	MDAMB231 CTR	Pre-mRNA-processing factor 40 homolog A	PRPF40A	25.948	0.0011131	0.0041574	MDAMB468-HS578t; MDAMB468-MDAMB231
P27695	10	1.67187	MDAMB468 CTR	Hs 578T CTR	DNA-(apurinic or apyrimidinic site) endonuclease	APEX1	25.908	0.0011176	0.0041676	MDAMB468-HS578t; MDAMB468-MDAMB231
P12236	20	1.72498	MDAMB468 CTR	Hs 578T CTR	ADP/ATP translocase 3	SLC25A6	25.624	0.0011513	0.0042483	MDAMB468-HS578t; MDAMB468-MDAMB231
Q8WWI1	5	3.02191	Hs 578T CTR	MDAMB468 CTR	LIM domain only protein 7	LMO7	25.598	0.0011543	0.0042483	MDAMB468-HS578t; MDAMB468-MDAMB231
P09496	4	1.77367	Hs 578T CTR	MDAMB468 CTR	Clathrin light chain A	CLTA	25.144	0.0012111	0.0043904	MDAMB468-HS578t; MDAMB468-MDAMB231
P55072	61	1.85429	MDAMB468 CTR	MDAMB231 CTR	Transitional endoplasmic reticulum ATPase	VCP	25.134	0.0012124	0.0043904	MDAMB468-HS578t; MDAMB468-MDAMB231
Q15393	24	1.86828	MDAMB468 CTR	MDAMB231 CTR	Splicing factor 3B subunit 3	SF3B3	25.049	0.0012235	0.0044093	MDAMB468-HS578t; MDAMB468-MDAMB231
Q8IWA5	5	3.81267	MDAMB468 CTR	MDAMB231 CTR	Choline transporter-like protein 2	SLC44A2	24.927	0.0012397	0.0044462	MDAMB468-HS578t; MDAMB468-MDAMB231
Q8N1F7	4	1.79121	MDAMB468 CTR	Hs 578T CTR	Nuclear pore complex protein Nup93	NUP93	24.453	0.001305	0.0045857	MDAMB468-HS578t; MDAMB468-MDAMB231
O75663	8	1.966	MDAMB468 CTR	MDAMB231 CTR	TIP41-like protein	TIPRL	24.242	0.0013354	0.0046782	MDAMB468-HS578t; MDAMB468-MDAMB231
P46109	1	1.80197	Hs 578T CTR	MDAMB468 CTR	Crk-like protein	CRKL	24.153	0.0013487	0.0046949	MDAMB468-HS578t; MDAMB468-MDAMB231
Q8N9U0	2	1.97368	MDAMB468 CTR	MDAMB231 CTR	Tandem C2 domains nuclear protein	TC2N	24.135	0.0013513	0.0046949	MDAMB468-HS578t; MDAMB468-MDAMB231
Q13637	2	7.95984	MDAMB231 CTR	MDAMB468 CTR	Ras-related protein Rab-32	RAB32	24.121	0.0013534	0.0046949	MDAMB468-HS578t; MDAMB468-MDAMB231
Q8NBJ7	5	2.94775	MDAMB468 CTR	MDAMB231 CTR	Inactive C-alpha-formylglycine-generating enzyme 2	SUMF2	24.112	0.0013548	0.0046949	MDAMB468-HS578t; MDAMB468-MDAMB231
P16949	10	2.36582	MDAMB468 CTR	Hs 578T CTR	Stathmin	STMN1	24.034	0.0013666	0.0047284	MDAMB468-HS578t; MDAMB468-MDAMB231
P54707	3	4.23829	Hs 578T CTR	MDAMB468 CTR	Potassium-transporting ATPase alpha chain 2	ATP12A	23.528	0.0014462	0.0049063	MDAMB468-HS578t; MDAMB468-MDAMB231
Q9UEW8	1	50.2599	MDAMB468 CTR	Hs 578T CTR	STE20/SPS1-related proline-alanine-rich protein kinase	STK39	23.492	0.0014522	0.0049187	MDAMB468-HS578t; MDAMB468-MDAMB231
P30154	6	1.89312	Hs 578T CTR	MDAMB468 CTR	Serine/threonine-protein phosphatase 2A 65 kDa regulatory subunit A beta isoform	PPP2R1B	23.387	0.0014695	0.0049407	MDAMB468-HS578t; MDAMB468-MDAMB231
Q9UHB6	10	2.60693	Hs 578T CTR	MDAMB468 CTR	LIM domain and actin-binding protein 1	LIMA1	23.307	0.001483	0.0049531	MDAMB468-HS578t; MDAMB468-MDAMB231
P84095	4	2.04058	Hs 578T CTR	MDAMB468 CTR	Rho-related GTP-binding protein RhoG	RHOG	23.287	0.0014864	0.0049531	MDAMB468-HS578t; MDAMB468-MDAMB231
P07947	4	2.22723	MDAMB468 CTR	MDAMB231 CTR	Tyrosine-protein kinase Yes	YES1	23.011	0.0015343	0.005068	MDAMB468-HS578t; MDAMB468-MDAMB231
Q9UHD8	11	1.36934	MDAMB468 CTR	MDAMB231 CTR	Septin-9	SEPTIN9	22.934	0.001548	0.0050894	MDAMB468-HS578t; MDAMB468-MDAMB231
Q9UQK1	2	1.84728	Hs 578T CTR	MDAMB468 CTR	Protein phosphatase 1 regulatory subunit 3C	PPP1R3C	22.856	0.001562	0.0051109	MDAMB468-HS578t; MDAMB468-MDAMB231
Q13151	5	1.92898	MDAMB468 CTR	Hs 578T CTR	Heterogeneous nuclear ribonucleoprotein A0	HNRNPA0	22.756	0.0015803	0.005126	MDAMB468-HS578t; MDAMB468-MDAMB231
A6NCJ1	1	2.8848	Hs 578T CTR	MDAMB468 CTR	Uncharacterized protein C19orf71	C19orf71	22.69	0.0015924	0.0051395	MDAMB468-HS578t; MDAMB468-MDAMB231
P02786	24	1.52351	MDAMB468 CTR	MDAMB231 CTR	Transferrin receptor protein 1	TFRC	22.475	0.0016332	0.0052484	MDAMB468-HS578t; MDAMB468-MDAMB231
Q9BXF6	3	1.56247	Hs 578T CTR	MDAMB468 CTR	Rab11 family-interacting protein 5	RAB11FIP5	22.314	0.0016645	0.005334	MDAMB468-HS578t; MDAMB468-MDAMB231
P05141	9	1.87412	MDAMB468 CTR	Hs 578T CTR	ADP/ATP translocase 2	SLC25A5	22.215	0.0016842	0.0053652	MDAMB468-HS578t; MDAMB468-MDAMB231
Q00526	1	22.5462	MDAMB231 CTR	MDAMB468 CTR	Cyclin-dependent kinase 3	CDK3	22.205	0.0016861	0.0053652	MDAMB468-HS578t; MDAMB468-MDAMB231
P07948	3	1.95018	Hs 578T CTR	MDAMB468 CTR	Tyrosine-protein kinase Lyn	LYN	22.003	0.0017274	0.0054587	MDAMB468-HS578t; MDAMB468-MDAMB231
Q00537	2	4.2389	MDAMB231 CTR	MDAMB468 CTR	Cyclin-dependent kinase 17	CDK17	21.97	0.0017343	0.0054646	MDAMB468-HS578t; MDAMB468-MDAMB231
P09497	1	2.4812	Hs 578T CTR	MDAMB468 CTR	Clathrin light chain B	CLTB	21.927	0.0017432	0.0054813	MDAMB468-HS578t; MDAMB468-MDAMB231
Q13310	8	1.49462	MDAMB468 CTR	MDAMB231 CTR	Polyadenylate-binding protein 4	PABPC4	21.921	0.0017445	0.0054813	MDAMB468-HS578t; MDAMB468-MDAMB231
P09132	1	3.90995	MDAMB231 CTR	MDAMB468 CTR	Signal recognition particle 19 kDa protein	SRP19	21.852	0.001759	0.0055192	MDAMB468-HS578t; MDAMB468-MDAMB231
P45381	2	2.43486	Hs 578T CTR	MDAMB468 CTR	Aspartoacylase	ASPA	21.682	0.0017956	0.0056029	MDAMB468-HS578t; MDAMB468-MDAMB231
Q92841	35	1.50136	MDAMB468 CTR	MDAMB231 CTR	Probable ATP-dependent RNA helicase DDX17	DDX17	21.568	0.0018207	0.00565	MDAMB468-HS578t; MDAMB468-MDAMB231
Q9NX14	1	2.8508	Hs 578T CTR	MDAMB468 CTR	NADH dehydrogenase [ubiquinone] 1 beta subcomplex subunit 11_ mitochondrial	NDUFB11	21.53	0.0018292	0.0056686	MDAMB468-HS578t; MDAMB468-MDAMB231
A3KMH1	6	1.70947	MDAMB231 CTR	MDAMB468 CTR	von Willebrand factor A domain-containing protein 8	VWA8	21.422	0.0018537	0.0057131	MDAMB468-HS578t; MDAMB468-MDAMB231
P04181	16	1.65519	MDAMB468 CTR	MDAMB231 CTR	Ornithine aminotransferase_ mitochondrial	OAT	21.399	0.0018589	0.0057168	MDAMB468-HS578t; MDAMB468-MDAMB231
Q9NS69	2	2.29269	MDAMB468 CTR	Hs 578T CTR	Mitochondrial import receptor subunit TOM22 homolog	TOMM22	21.304	0.0018807	0.0057569	MDAMB468-HS578t; MDAMB468-MDAMB231
P56385	1	5.57009	MDAMB231 CTR	MDAMB468 CTR	ATP synthase subunit e_ mitochondrial	ATP5ME	21.286	0.001885	0.0057584	MDAMB468-HS578t; MDAMB468-MDAMB231
P29992	5	2.24787	MDAMB468 CTR	Hs 578T CTR	Guanine nucleotide-binding protein subunit alpha-11	GNA11	21.258	0.0018915	0.0057666	MDAMB468-HS578t; MDAMB468-MDAMB231
P50151	1	2.22896	MDAMB468 CTR	Hs 578T CTR	Guanine nucleotide-binding protein G(I)/G(S)/G(O) subunit gamma-10	GNG10	21.21	0.0019028	0.0057767	MDAMB468-HS578t; MDAMB468-MDAMB231
Q9UHL4	3	1.80837	Hs 578T CTR	MDAMB468 CTR	Dipeptidyl peptidase 2	DPP7	21.054	0.0019401	0.0058591	MDAMB468-HS578t; MDAMB468-MDAMB231
P62942	8	1.81728	Hs 578T CTR	MDAMB468 CTR	Peptidyl-prolyl cis-trans isomerase FKBP1A	FKBP1A	20.976	0.001959	0.0059005	MDAMB468-HS578t; MDAMB468-MDAMB231
P35244	8	1.52241	MDAMB468 CTR	Hs 578T CTR	Replication protein A 14 kDa subunit	RPA3	20.813	0.0019995	0.0060066	MDAMB468-HS578t; MDAMB468-MDAMB231
P78330	8	5.37684	MDAMB468 CTR	MDAMB231 CTR	Phosphoserine phosphatase	PSPH	20.503	0.0020798	0.0061645	MDAMB468-HS578t; MDAMB468-MDAMB231
Q9ULH1	2	9.27665	Hs 578T CTR	MDAMB468 CTR	Arf-GAP with SH3 domain_ ANK repeat and PH domain-containing protein 1	ASAP1	20.468	0.0020889	0.0061765	MDAMB468-HS578t; MDAMB468-MDAMB231
P29317	13	2.31164	MDAMB231 CTR	MDAMB468 CTR	Ephrin type-A receptor 2	EPHA2	19.995	0.0022205	0.0064637	MDAMB468-HS578t; MDAMB468-MDAMB231
Q6NUK1	12	1.35051	MDAMB231 CTR	MDAMB468 CTR	Calcium-binding mitochondrial carrier protein SCaMC-1	SLC25A24	19.824	0.0022708	0.0065736	MDAMB468-HS578t; MDAMB468-MDAMB231
P40925	8	1.77727	MDAMB468 CTR	MDAMB231 CTR	Malate dehydrogenase_ cytoplasmic	MDH1	19.758	0.0022907	0.006617	MDAMB468-HS578t; MDAMB468-MDAMB231
P15586	4	2.17809	MDAMB468 CTR	MDAMB231 CTR	N-acetylglucosamine-6-sulfatase	GNS	19.615	0.0023345	0.0067263	MDAMB468-HS578t; MDAMB468-MDAMB231
Q00610	91	1.76781	Hs 578T CTR	MDAMB468 CTR	Clathrin heavy chain 1	CLTC	19.557	0.0023524	0.0067517	MDAMB468-HS578t; MDAMB468-MDAMB231
E9PRG8	2	1.90778	MDAMB468 CTR	MDAMB231 CTR	Uncharacterized protein C11orf98	C11orf98	19.548	0.0023553	0.0067517	MDAMB468-HS578t; MDAMB468-MDAMB231
O14974	7	3.69124	Hs 578T CTR	MDAMB468 CTR	Protein phosphatase 1 regulatory subunit 12A	PPP1R12A	19.465	0.0023815	0.0067975	MDAMB468-HS578t; MDAMB468-MDAMB231
P61221	17	1.59047	Hs 578T CTR	MDAMB468 CTR	ATP-binding cassette sub-family E member 1	ABCE1	19.465	0.0023816	0.0067975	MDAMB468-HS578t; MDAMB468-MDAMB231
Q13586	1	11.5115	Hs 578T CTR	MDAMB468 CTR	Stromal interaction molecule 1	STIM1	19.323	0.0024271	0.0069049	MDAMB468-HS578t; MDAMB468-MDAMB231
Q12904	10	1.30474	MDAMB468 CTR	Hs 578T CTR	Aminoacyl tRNA synthase complex-interacting multifunctional protein 1	AIMP1	19.246	0.0024527	0.0069564	MDAMB468-HS578t; MDAMB468-MDAMB231
Q9Y6M1	5	4.18089	Hs 578T CTR	MDAMB468 CTR	Insulin-like growth factor 2 mRNA-binding protein 2	IGF2BP2	19.24	0.0024545	0.0069564	MDAMB468-HS578t; MDAMB468-MDAMB231
Q6ZWB6	1	10.3661	MDAMB231 CTR	MDAMB468 CTR	BTB/POZ domain-containing protein KCTD8	KCTD8	19.231	0.0024575	0.0069564	MDAMB468-HS578t; MDAMB468-MDAMB231
P62854	4	1.5697	MDAMB468 CTR	MDAMB231 CTR	40S ribosomal protein S26	RPS26	19.086	0.0025063	0.0070649	MDAMB468-HS578t; MDAMB468-MDAMB231
Q9Y6A9	1	5.94692	MDAMB468 CTR	Hs 578T CTR	Signal peptidase complex subunit 1	SPCS1	19.033	0.0025244	0.0070921	MDAMB468-HS578t; MDAMB468-MDAMB231
Q9ULV4	18	1.59645	MDAMB231 CTR	MDAMB468 CTR	Coronin-1C	CORO1C	18.609	0.0026758	0.0074435	MDAMB468-HS578t; MDAMB468-MDAMB231
Q9P0M6	4	1.72788	MDAMB468 CTR	MDAMB231 CTR	Core histone macro-H2A.2	MACROH2A2	18.582	0.002686	0.0074535	MDAMB468-HS578t; MDAMB468-MDAMB231
O43237	5	1.76655	MDAMB468 CTR	Hs 578T CTR	Cytoplasmic dynein 1 light intermediate chain 2	DYNC1LI2	18.421	0.002747	0.0075947	MDAMB468-HS578t; MDAMB468-MDAMB231
P28066	9	1.49744	MDAMB468 CTR	MDAMB231 CTR	Proteasome subunit alpha type-5	PSMA5	18.359	0.0027708	0.0076349	MDAMB468-HS578t; MDAMB468-MDAMB231
Q12905	15	1.75485	MDAMB468 CTR	MDAMB231 CTR	Interleukin enhancer-binding factor 2	ILF2	18.342	0.0027777	0.007642	MDAMB468-HS578t; MDAMB468-MDAMB231
Q9Y5K6	8	1.91094	MDAMB468 CTR	Hs 578T CTR	CD2-associated protein	CD2AP	18.256	0.0028116	0.0077164	MDAMB468-HS578t; MDAMB468-MDAMB231
P52597	20	1.74027	MDAMB468 CTR	Hs 578T CTR	Heterogeneous nuclear ribonucleoprotein F	HNRNPF	18.246	0.0028152	0.007717	MDAMB468-HS578t; MDAMB468-MDAMB231
P62937	23	2.00237	MDAMB468 CTR	MDAMB231 CTR	Peptidyl-prolyl cis-trans isomerase A	PPIA	18.223	0.0028246	0.0077333	MDAMB468-HS578t; MDAMB468-MDAMB231
Q9H0A0	21	1.76669	MDAMB468 CTR	Hs 578T CTR	RNA cytidine acetyltransferase	NAT10	18.172	0.0028449	0.0077794	MDAMB468-HS578t; MDAMB468-MDAMB231
P12814	42	1.77395	Hs 578T CTR	MDAMB468 CTR	Alpha-actinin-1	ACTN1	18.066	0.002888	0.0078539	MDAMB468-HS578t; MDAMB468-MDAMB231
Q13243	3	1.65521	MDAMB468 CTR	Hs 578T CTR	Serine/arginine-rich splicing factor 5	SRSF5	18.028	0.0029038	0.0078643	MDAMB468-HS578t; MDAMB468-MDAMB231
O60506	29	1.7195	MDAMB468 CTR	MDAMB231 CTR	Heterogeneous nuclear ribonucleoprotein Q	SYNCRIP	18.007	0.0029126	0.0078719	MDAMB468-HS578t; MDAMB468-MDAMB231
Q8WVV9	2	3.25296	Hs 578T CTR	MDAMB468 CTR	Heterogeneous nuclear ribonucleoprotein L-like	HNRNPLL	18.004	0.0029136	0.0078719	MDAMB468-HS578t; MDAMB468-MDAMB231
Q96Q42	1	1.91985	MDAMB231 CTR	MDAMB468 CTR	Alsin	ALS2	17.923	0.0029478	0.0079359	MDAMB468-HS578t; MDAMB468-MDAMB231
Q96LZ3	1	13.8343	Hs 578T CTR	MDAMB468 CTR	Calcineurin subunit B type 2	PPP3R2	17.738	0.0030274	0.0081018	MDAMB468-HS578t; MDAMB468-MDAMB231
P61201	11	2.14235	Hs 578T CTR	MDAMB468 CTR	COP9 signalosome complex subunit 2	COPS2	17.679	0.0030531	0.0081417	MDAMB468-HS578t; MDAMB468-MDAMB231
P22102	34	1.65989	MDAMB468 CTR	Hs 578T CTR	Trifunctional purine biosynthetic protein adenosine-3	GART	17.634	0.0030735	0.0081766	MDAMB468-HS578t; MDAMB468-MDAMB231
Q9BXJ9	21	1.40039	Hs 578T CTR	MDAMB468 CTR	N-alpha-acetyltransferase 15_ NatA auxiliary subunit	NAA15	17.603	0.0030872	0.0082036	MDAMB468-HS578t; MDAMB468-MDAMB231
Q16891	20	1.38262	MDAMB468 CTR	Hs 578T CTR	MICOS complex subunit MIC60	IMMT	17.59	0.0030929	0.008209	MDAMB468-HS578t; MDAMB468-MDAMB231
P13637	4	1.28976	Hs 578T CTR	MDAMB468 CTR	Sodium/potassium-transporting ATPase subunit alpha-3	ATP1A3	17.573	0.0031006	0.0082196	MDAMB468-HS578t; MDAMB468-MDAMB231
O15247	4	4.35863	Hs 578T CTR	MDAMB468 CTR	Chloride intracellular channel protein 2	CLIC2	17.556	0.0031086	0.0082236	MDAMB468-HS578t; MDAMB468-MDAMB231
Q9UDY2	11	1.53139	MDAMB468 CTR	Hs 578T CTR	Tight junction protein ZO-2	TJP2	17.482	0.0031421	0.008281	MDAMB468-HS578t; MDAMB468-MDAMB231
P52701	15	1.32923	MDAMB468 CTR	MDAMB231 CTR	DNA mismatch repair protein Msh6	MSH6	17.233	0.0032599	0.0084922	MDAMB468-HS578t; MDAMB468-MDAMB231
P40261	2	2.05343	Hs 578T CTR	MDAMB468 CTR	Nicotinamide N-methyltransferase	NNMT	17.207	0.0032722	0.0085145	MDAMB468-HS578t; MDAMB468-MDAMB231
Q9Y3E5	5	1.71974	MDAMB468 CTR	MDAMB231 CTR	Peptidyl-tRNA hydrolase 2_ mitochondrial	PTRH2	17.056	0.0033467	0.0086524	MDAMB468-HS578t; MDAMB468-MDAMB231
O00159	28	1.97848	Hs 578T CTR	MDAMB468 CTR	Unconventional myosin-Ic	MYO1C	17.033	0.0033584	0.0086689	MDAMB468-HS578t; MDAMB468-MDAMB231
Q8NFU3	3	1.87479	MDAMB468 CTR	MDAMB231 CTR	Thiosulfate:glutathione sulfurtransferase	TSTD1	16.68	0.0035425	0.0090612	MDAMB468-HS578t; MDAMB468-MDAMB231
Q7L014	20	1.324	MDAMB468 CTR	MDAMB231 CTR	Probable ATP-dependent RNA helicase DDX46	DDX46	16.581	0.0035964	0.0091302	MDAMB468-HS578t; MDAMB468-MDAMB231
Q9BWD1	10	1.72758	MDAMB468 CTR	Hs 578T CTR	Acetyl-CoA acetyltransferase_ cytosolic	ACAT2	16.504	0.0036391	0.0092142	MDAMB468-HS578t; MDAMB468-MDAMB231
Q8N1G4	3	1.61802	MDAMB468 CTR	MDAMB231 CTR	Leucine-rich repeat-containing protein 47	LRRC47	16.465	0.0036608	0.0092482	MDAMB468-HS578t; MDAMB468-MDAMB231
P22455	1	2.38165	MDAMB231 CTR	MDAMB468 CTR	Fibroblast growth factor receptor 4	FGFR4	16.438	0.0036763	0.0092669	MDAMB468-HS578t; MDAMB468-MDAMB231
P50897	7	1.83079	MDAMB468 CTR	MDAMB231 CTR	Palmitoyl-protein thioesterase 1	PPT1	16.42	0.0036866	0.0092724	MDAMB468-HS578t; MDAMB468-MDAMB231
Q92947	1	14.2876	MDAMB468 CTR	Hs 578T CTR	Glutaryl-CoA dehydrogenase_ mitochondrial	GCDH	16.301	0.0037553	0.0094029	MDAMB468-HS578t; MDAMB468-MDAMB231
P52272	45	1.72453	MDAMB468 CTR	MDAMB231 CTR	Heterogeneous nuclear ribonucleoprotein M	HNRNPM	16.184	0.0038243	0.0095439	MDAMB468-HS578t; MDAMB468-MDAMB231
P27708	38	1.40629	MDAMB231 CTR	MDAMB468 CTR	CAD protein	CAD	16.128	0.0038582	0.0096071	MDAMB468-HS578t; MDAMB468-MDAMB231
P22626	23	1.85917	MDAMB468 CTR	MDAMB231 CTR	Heterogeneous nuclear ribonucleoproteins A2/B1	HNRNPA2B1	15.884	0.0040094	0.009918	MDAMB468-HS578t; MDAMB468-MDAMB231
P20794	3	2.22495	MDAMB468 CTR	MDAMB231 CTR	Serine/threonine-protein kinase MAK	MAK	15.874	0.0040157	0.0099226	MDAMB468-HS578t; MDAMB468-MDAMB231
P23634	6	1.81512	MDAMB231 CTR	MDAMB468 CTR	Plasma membrane calcium-transporting ATPase 4	ATP2B4	15.792	0.0040689	0.010027	MDAMB468-HS578t; MDAMB468-MDAMB231
Q04446	16	2.43517	Hs 578T CTR	MDAMB468 CTR	1_4-alpha-glucan-branching enzyme	GBE1	15.622	0.0041809	0.010269	MDAMB468-HS578t; MDAMB468-MDAMB231
Q00839	39	1.362	MDAMB468 CTR	MDAMB231 CTR	Heterogeneous nuclear ribonucleoprotein U	HNRNPU	15.509	0.0042583	0.010374	MDAMB468-HS578t; MDAMB468-MDAMB231
Q07666	10	1.4415	MDAMB468 CTR	MDAMB231 CTR	KH domain-containing_ RNA-binding_ signal transduction-associated protein 1	KHDRBS1	15.383	0.0043459	0.010509	MDAMB468-HS578t; MDAMB468-MDAMB231
Q14141	1	55.9258	MDAMB468 CTR	MDAMB231 CTR	Septin-6	SEPTIN6	14.963	0.0046583	0.011016	MDAMB468-HS578t; MDAMB468-MDAMB231
Q13907	6	1.70406	MDAMB468 CTR	MDAMB231 CTR	Isopentenyl-diphosphate Delta-isomerase 1	IDI1	14.953	0.0046664	0.011023	MDAMB468-HS578t; MDAMB468-MDAMB231
P55327	6	1.88363	MDAMB468 CTR	Hs 578T CTR	Tumor protein D52	TPD52	14.77	0.0048119	0.01132	MDAMB468-HS578t; MDAMB468-MDAMB231
P17655	33	1.61322	MDAMB231 CTR	MDAMB468 CTR	Calpain-2 catalytic subunit	CAPN2	14.761	0.0048187	0.011324	MDAMB468-HS578t; MDAMB468-MDAMB231
Q53GA4	4	2.19134	MDAMB468 CTR	MDAMB231 CTR	Pleckstrin homology-like domain family A member 2	PHLDA2	14.701	0.0048679	0.011368	MDAMB468-HS578t; MDAMB468-MDAMB231
P46776	6	1.32434	MDAMB468 CTR	Hs 578T CTR	60S ribosomal protein L27a	RPL27A	14.689	0.0048781	0.01137	MDAMB468-HS578t; MDAMB468-MDAMB231
O15085	6	1.83075	Hs 578T CTR	MDAMB468 CTR	Rho guanine nucleotide exchange factor 11	ARHGEF11	14.604	0.0049491	0.011499	MDAMB468-HS578t; MDAMB468-MDAMB231
P62273	3	1.4214	MDAMB468 CTR	Hs 578T CTR	40S ribosomal protein S29	RPS29	14.562	0.0049847	0.011546	MDAMB468-HS578t; MDAMB468-MDAMB231
Q15046	16	1.68162	MDAMB468 CTR	MDAMB231 CTR	Lysine--tRNA ligase	KARS1	14.445	0.0050857	0.011743	MDAMB468-HS578t; MDAMB468-MDAMB231
O75083	27	1.66621	MDAMB231 CTR	MDAMB468 CTR	WD repeat-containing protein 1	WDR1	14.367	0.0051544	0.011848	MDAMB468-HS578t; MDAMB468-MDAMB231
Q6UWB4	3	1.72259	MDAMB468 CTR	MDAMB231 CTR	Serine protease 55	PRSS55	14.358	0.0051624	0.011848	MDAMB468-HS578t; MDAMB468-MDAMB231
Q9UJU6	13	1.23602	MDAMB468 CTR	MDAMB231 CTR	Drebrin-like protein	DBNL	14.323	0.0051942	0.011897	MDAMB468-HS578t; MDAMB468-MDAMB231
Q86VH2	2	25.0974	MDAMB468 CTR	Hs 578T CTR	Kinesin-like protein KIF27	KIF27	14.276	0.0052364	0.011969	MDAMB468-HS578t; MDAMB468-MDAMB231
Q8WVJ2	1	11.4503	MDAMB468 CTR	Hs 578T CTR	NudC domain-containing protein 2	NUDCD2	14.256	0.0052548	0.011975	MDAMB468-HS578t; MDAMB468-MDAMB231
P22607	2	4.29568	MDAMB231 CTR	MDAMB468 CTR	Fibroblast growth factor receptor 3	FGFR3	13.969	0.0055259	0.012504	MDAMB468-HS578t; MDAMB468-MDAMB231
O95758	1	3.12075	MDAMB468 CTR	MDAMB231 CTR	Polypyrimidine tract-binding protein 3	PTBP3	13.94	0.0055546	0.01255	MDAMB468-HS578t; MDAMB468-MDAMB231
P14866	23	1.22531	MDAMB468 CTR	Hs 578T CTR	Heterogeneous nuclear ribonucleoprotein L	HNRNPL	13.937	0.0055573	0.01255	MDAMB468-HS578t; MDAMB468-MDAMB231
P62857	5	1.78541	MDAMB468 CTR	MDAMB231 CTR	40S ribosomal protein S28	RPS28	15.674	0.0041463	0.010201	MDAMB468-MDAMB231
P10809	52	1.81046	MDAMB468 CTR	MDAMB231 CTR	60 kDa heat shock protein_ mitochondrial	HSPD1	15.247	0.0044442	0.010677	MDAMB468-MDAMB231
Q9P258	17	1.34645	MDAMB468 CTR	MDAMB231 CTR	Protein RCC2	RCC2	15.001	0.0046285	0.010987	MDAMB468-MDAMB231
P49903	6	1.54582	MDAMB468 CTR	MDAMB231 CTR	Selenide_ water dikinase 1	SEPHS1	14.729	0.0048452	0.011368	MDAMB468-MDAMB231
Q9P2S6	2	1.37192	MDAMB468 CTR	MDAMB231 CTR	Ankyrin repeat and MYND domain-containing protein 1	ANKMY1	14.004	0.0054915	0.012439	MDAMB468-MDAMB231
Q66K74	3	1.62758	MDAMB231 CTR	MDAMB468 CTR	Microtubule-associated protein 1S	MAP1S	13.92	0.0055737	0.012574	MDAMB468-MDAMB231
Q13185	11	1.72401	MDAMB468 CTR	MDAMB231 CTR	Chromobox protein homolog 3	CBX3	13.915	0.0055792	0.012574
P60174	29	2.07228	Hs 578T CTR	MDAMB468 CTR	Triosephosphate isomerase	TPI1	13.899	0.0055948	0.012584
P05362	4	1.60152	MDAMB468 CTR	MDAMB231 CTR	Intercellular adhesion molecule 1	ICAM1	13.899	0.005595	0.012584
P07602	16	1.7033	Hs 578T CTR	MDAMB468 CTR	Prosaposin	PSAP	13.797	0.0056972	0.012802
P08708	7	1.74349	MDAMB468 CTR	MDAMB231 CTR	40S ribosomal protein S17	RPS17	13.786	0.0057087	0.012815
Q9NR28	3	1.88544	MDAMB468 CTR	Hs 578T CTR	Diablo homolog_ mitochondrial	DIABLO	13.78	0.005715	0.012816
P25705	43	1.559	Hs 578T CTR	MDAMB231 CTR	ATP synthase subunit alpha_ mitochondrial	ATP5F1A	13.717	0.0057799	0.012949
Q8IYD1	4	1.49894	MDAMB468 CTR	MDAMB231 CTR	Eukaryotic peptide chain release factor GTP-binding subunit ERF3B	GSPT2	13.708	0.0057885	0.012955
P43243	30	1.34008	MDAMB468 CTR	MDAMB231 CTR	Matrin-3	MATR3	13.684	0.0058135	0.012998
P06132	6	1.80191	MDAMB231 CTR	Hs 578T CTR	Uroporphyrinogen decarboxylase	UROD	13.662	0.0058368	0.013037
P13861	11	1.50497	Hs 578T CTR	MDAMB468 CTR	cAMP-dependent protein kinase type II-alpha regulatory subunit	PRKAR2A	13.646	0.0058536	0.013062
Q5SY85	1	2.49083	MDAMB468 CTR	MDAMB231 CTR	Protein FAM201A	FAM201A	13.627	0.0058743	0.013095
Q9NQW6	5	1.59163	MDAMB468 CTR	Hs 578T CTR	Anillin	ANLN	13.541	0.0059656	0.013286
P05976	1	6.40023	MDAMB468 CTR	Hs 578T CTR	Myosin light chain 1/3_ skeletal muscle isoform	MYL1	13.526	0.0059826	0.01331
P22307	3	1.8453	MDAMB468 CTR	MDAMB231 CTR	Sterol carrier protein 2	SCP2	13.496	0.006015	0.013362
P78371	33	1.72082	Hs 578T CTR	MDAMB231 CTR	T-complex protein 1 subunit beta	CCT2	13.493	0.0060178	0.013362
P0CG36	2	2.12824	Hs 578T CTR	MDAMB468 CTR	Cryptic family protein 1B	CFC1B	13.487	0.006025	0.013365
P11216	27	1.49261	MDAMB231 CTR	Hs 578T CTR	Glycogen phosphorylase_ brain form	PYGB	13.481	0.0060308	0.013365
P49419	13	1.3839	MDAMB468 CTR	MDAMB231 CTR	Alpha-aminoadipic semialdehyde dehydrogenase	ALDH7A1	13.462	0.0060524	0.013396
Q16881	25	2.48949	Hs 578T CTR	MDAMB231 CTR	Thioredoxin reductase 1_ cytoplasmic	TXNRD1	13.458	0.0060566	0.013396
P55010	6	2.49107	MDAMB468 CTR	Hs 578T CTR	Eukaryotic translation initiation factor 5	EIF5	13.452	0.0060636	0.013398
O95202	11	1.29137	Hs 578T CTR	MDAMB468 CTR	Mitochondrial proton/calcium exchanger protein	LETM1	13.409	0.0061108	0.013484
Q5TAB7	1	1.50854	MDAMB468 CTR	Hs 578T CTR	Protein ripply2	RIPPLY2	13.406	0.0061143	0.013484
P49720	8	1.77027	MDAMB468 CTR	Hs 578T CTR	Proteasome subunit beta type-3	PSMB3	13.4	0.0061213	0.013486
P05023	33	1.61687	MDAMB231 CTR	Hs 578T CTR	Sodium/potassium-transporting ATPase subunit alpha-1	ATP1A1	13.362	0.0061642	0.013567
P13796	14	2.59243	Hs 578T CTR	MDAMB231 CTR	Plastin-2	LCP1	13.345	0.006183	0.013595
Q9Y2T7	2	1.95728	MDAMB468 CTR	Hs 578T CTR	Y-box-binding protein 2	YBX2	13.321	0.0062108	0.013643
O60516	1	2.41679	MDAMB468 CTR	Hs 578T CTR	Eukaryotic translation initiation factor 4E-binding protein 3	EIF4EBP3	13.291	0.0062447	0.013704
P54652	9	2.05768	Hs 578T CTR	MDAMB468 CTR	Heat shock-related 70 kDa protein 2	HSPA2	13.279	0.0062588	0.01371
P49023	10	1.46316	MDAMB231 CTR	MDAMB468 CTR	Paxillin	PXN	13.276	0.0062619	0.01371
O43837	2	1.84454	Hs 578T CTR	MDAMB468 CTR	Isocitrate dehydrogenase [NAD] subunit beta_ mitochondrial	IDH3B	13.273	0.0062654	0.01371
Q9UK41	2	1.79941	Hs 578T CTR	MDAMB468 CTR	Vacuolar protein sorting-associated protein 28 homolog	VPS28	13.232	0.0063132	0.01379
Q9Y536	3	1.74221	Hs 578T CTR	MDAMB231 CTR	Peptidyl-prolyl cis-trans isomerase A-like 4A	PPIAL4A	13.231	0.0063144	0.01379
Q13620	9	1.36607	Hs 578T CTR	MDAMB468 CTR	Cullin-4B	CUL4B	13.135	0.0064281	0.014025
P39023	16	1.48137	MDAMB468 CTR	MDAMB231 CTR	60S ribosomal protein L3	RPL3	13.123	0.0064425	0.014043
Q7LBC6	3	2.33895	Hs 578T CTR	MDAMB231 CTR	Lysine-specific demethylase 3B	KDM3B	13.114	0.0064524	0.014051
Q9BTM1	7	10.9187	Hs 578T CTR	MDAMB231 CTR	Histone H2A.J	H2AJ	13.102	0.006467	0.014069
P47985	4	1.65993	MDAMB231 CTR	Hs 578T CTR	Cytochrome b-c1 complex subunit Rieske_ mitochondrial	UQCRFS1	13.08	0.006494	0.014111
Q86X76	3	1.79912	MDAMB231 CTR	Hs 578T CTR	Deaminated glutathione amidase	NIT1	13.075	0.0064998	0.014111
P31327	1	2.22633	MDAMB468 CTR	MDAMB231 CTR	Carbamoyl-phosphate synthase [ammonia]_ mitochondrial	CPS1	13.066	0.0065109	0.014111
P33176	32	1.47226	Hs 578T CTR	MDAMB231 CTR	Kinesin-1 heavy chain	KIF5B	13.066	0.0065114	0.014111
P13797	35	1.52097	Hs 578T CTR	MDAMB468 CTR	Plastin-3	PLS3	13.013	0.0065754	0.014225
Q9BZK3	1	2.30046	Hs 578T CTR	MDAMB231 CTR	Putative nascent polypeptide-associated complex subunit alpha-like protein	NACA4P	13.012	0.0065764	0.014225
O76021	9	1.45205	MDAMB468 CTR	Hs 578T CTR	Ribosomal L1 domain-containing protein 1	RSL1D1	13.001	0.0065912	0.014243
P40617	1	5.98372	MDAMB231 CTR	MDAMB468 CTR	ADP-ribosylation factor-like protein 4A	ARL4A	12.942	0.0066637	0.014378
P35270	5	2.23431	Hs 578T CTR	MDAMB468 CTR	Sepiapterin reductase	SPR	12.94	0.0066662	0.014378
O00429	30	1.36493	MDAMB468 CTR	MDAMB231 CTR	Dynamin-1-like protein	DNM1L	12.872	0.0067529	0.014551
P63092	7	3.17895	MDAMB231 CTR	Hs 578T CTR	Guanine nucleotide-binding protein G(s) subunit alpha isoforms short	GNAS	12.798	0.0068475	0.01474
P30085	12	1.85227	MDAMB468 CTR	MDAMB231 CTR	UMP-CMP kinase	CMPK1	12.779	0.0068733	0.014775
O43592	7	2.23871	Hs 578T CTR	MDAMB468 CTR	Exportin-T	XPOT	12.771	0.0068825	0.014775
P26368	12	1.43122	MDAMB468 CTR	Hs 578T CTR	Splicing factor U2AF 65 kDa subunit	U2AF2	12.771	0.0068831	0.014775
P12268	26	1.49478	MDAMB231 CTR	MDAMB468 CTR	Inosine-5'-monophosphate dehydrogenase 2	IMPDH2	12.758	0.0069003	0.014798
Q9NPD3	1	2.8753	MDAMB231 CTR	Hs 578T CTR	Exosome complex component RRP41	EXOSC4	12.739	0.0069248	0.014836
Q9HAV7	6	2.38307	Hs 578T CTR	MDAMB468 CTR	GrpE protein homolog 1_ mitochondrial	GRPEL1	12.728	0.0069403	0.014855
O60493	5	1.55318	Hs 578T CTR	MDAMB231 CTR	Sorting nexin-3	SNX3	12.703	0.0069729	0.014901
Q9UKI2	1	6.35098	Hs 578T CTR	MDAMB468 CTR	Cdc42 effector protein 3	CDC42EP3	12.702	0.0069749	0.014901
Q99613	28	1.21798	Hs 578T CTR	MDAMB231 CTR	Eukaryotic translation initiation factor 3 subunit C	EIF3C	12.629	0.007073	0.015076
O43768	1	2.40011	MDAMB468 CTR	Hs 578T CTR	Alpha-endosulfine	ENSA	12.627	0.0070748	0.015076
Q92643	1	3.04408	Hs 578T CTR	MDAMB231 CTR	GPI-anchor transamidase	PIGK	12.626	0.0070768	0.015076
P58546	1	2.00573	MDAMB468 CTR	MDAMB231 CTR	Myotrophin	MTPN	12.59	0.0071254	0.015158
P40939	30	1.41161	MDAMB468 CTR	MDAMB231 CTR	Trifunctional enzyme subunit alpha_ mitochondrial	HADHA	12.588	0.0071287	0.015158
P17987	32	1.32164	MDAMB468 CTR	Hs 578T CTR	T-complex protein 1 subunit alpha	TCP1	12.579	0.0071409	0.015169
Q04917	15	1.44734	MDAMB468 CTR	Hs 578T CTR	14-3-3 protein eta	YWHAH	12.547	0.007185	0.015249
P18085	8	1.70655	MDAMB468 CTR	MDAMB231 CTR	ADP-ribosylation factor 4	ARF4	12.487	0.0072694	0.015413
Q9H082	4	1.53027	Hs 578T CTR	MDAMB231 CTR	Ras-related protein Rab-33B	RAB33B	12.471	0.0072919	0.015447
P20290	12	1.47939	MDAMB468 CTR	Hs 578T CTR	Transcription factor BTF3	BTF3	12.455	0.0073136	0.015467
P59998	6	1.93547	Hs 578T CTR	MDAMB231 CTR	Actin-related protein 2/3 complex subunit 4	ARPC4	12.453	0.0073164	0.015467
Q8N283	4	1.68237	Hs 578T CTR	MDAMB231 CTR	Ankyrin repeat domain-containing protein 35	ANKRD35	12.445	0.0073282	0.015467
Q10471	1	16.3097	Hs 578T CTR	MDAMB468 CTR	Polypeptide N-acetylgalactosaminyltransferase 2	GALNT2	12.444	0.0073291	0.015467
Q9H098	1	16.1083	MDAMB468 CTR	Hs 578T CTR	Protein FAM107B	FAM107B	12.409	0.0073799	0.01556
P80303	4	3.28695	Hs 578T CTR	MDAMB231 CTR	Nucleobindin-2	NUCB2	12.389	0.007408	0.015605
O75312	1	3.33079	MDAMB468 CTR	MDAMB231 CTR	Zinc finger protein ZPR1	ZPR1	12.345	0.0074727	0.015723
Q06124	11	2.00246	MDAMB231 CTR	Hs 578T CTR	Tyrosine-protein phosphatase non-receptor type 11	PTPN11	12.34	0.0074803	0.015723
P13674	13	1.97244	Hs 578T CTR	MDAMB231 CTR	Prolyl 4-hydroxylase subunit alpha-1	P4HA1	12.333	0.00749	0.015723
O60749	4	1.59044	Hs 578T CTR	MDAMB468 CTR	Sorting nexin-2	SNX2	12.331	0.0074923	0.015723
O95865	3	1.45501	MDAMB468 CTR	MDAMB231 CTR	N(G)_N(G)-dimethylarginine dimethylaminohydrolase 2	DDAH2	12.325	0.0075022	0.015729
P14314	23	1.38919	Hs 578T CTR	MDAMB231 CTR	Glucosidase 2 subunit beta	PRKCSH	12.29	0.0075538	0.015813
Q6DD88	23	1.84655	Hs 578T CTR	MDAMB468 CTR	Atlastin-3	ATL3	12.288	0.0075559	0.015813
Q32MZ4	10	1.46515	MDAMB468 CTR	MDAMB231 CTR	Leucine-rich repeat flightless-interacting protein 1	LRRFIP1	12.269	0.0075845	0.015858
P49321	22	1.34005	MDAMB468 CTR	MDAMB231 CTR	Nuclear autoantigenic sperm protein	NASP	12.259	0.0076	0.015868
Q96MG2	1	2.89977	Hs 578T CTR	MDAMB468 CTR	Junctional sarcoplasmic reticulum protein 1	JSRP1	12.254	0.0076067	0.015868
Q04837	7	1.48543	MDAMB468 CTR	MDAMB231 CTR	Single-stranded DNA-binding protein_ mitochondrial	SSBP1	12.252	0.0076106	0.015868
O76094	8	2.94151	MDAMB231 CTR	Hs 578T CTR	Signal recognition particle subunit SRP72	SRP72	12.239	0.0076294	0.015893
P13073	6	1.8076	MDAMB468 CTR	Hs 578T CTR	Cytochrome c oxidase subunit 4 isoform 1_ mitochondrial	COX4I1	12.226	0.0076489	0.015919
Q58FF7	2	1.91799	Hs 578T CTR	MDAMB468 CTR	Putative heat shock protein HSP 90-beta-3	HSP90AB3P	12.2	0.007688	0.015973
E9PAV3	26	1.59714	Hs 578T CTR	MDAMB231 CTR	Nascent polypeptide-associated complex subunit alpha_ muscle-specific form	NACA	12.199	0.0076892	0.015973
Q9NY12	3	1.8521	MDAMB231 CTR	Hs 578T CTR	H/ACA ribonucleoprotein complex subunit 1	GAR1	12.185	0.0077106	0.016003
P11766	14	1.23857	Hs 578T CTR	MDAMB231 CTR	Alcohol dehydrogenase class-3	ADH5	12.177	0.0077231	0.016012
P61018	1	2.21382	Hs 578T CTR	MDAMB468 CTR	Ras-related protein Rab-4B	RAB4B	12.173	0.0077291	0.016012
Q6S8J3	28	1.46462	Hs 578T CTR	MDAMB231 CTR	POTE ankyrin domain family member E	POTEE	12.158	0.0077527	0.016046
Q15650	1	2.10023	Hs 578T CTR	MDAMB468 CTR	Activating signal cointegrator 1	TRIP4	12.149	0.007766	0.016059
P05121	2	2.03669	Hs 578T CTR	MDAMB231 CTR	Plasminogen activator inhibitor 1	SERPINE1	12.111	0.0078256	0.016167
P56134	2	1.72932	Hs 578T CTR	MDAMB231 CTR	ATP synthase subunit f_ mitochondrial	ATP5MF	12.086	0.0078633	0.01623
P49915	22	1.56722	MDAMB468 CTR	Hs 578T CTR	GMP synthase [glutamine-hydrolyzing]	GMPS	12.074	0.0078824	0.016255
O14579	12	1.87283	Hs 578T CTR	MDAMB231 CTR	Coatomer subunit epsilon	COPE	12.061	0.0079039	0.016284
Q5XKP0	1	1.43222	MDAMB468 CTR	MDAMB231 CTR	MICOS complex subunit MIC13	MICOS13	12.036	0.0079433	0.01635
P46940	62	1.52666	Hs 578T CTR	MDAMB468 CTR	Ras GTPase-activating-like protein IQGAP1	IQGAP1	11.984	0.0080259	0.016505
Q92974	18	1.61326	Hs 578T CTR	MDAMB468 CTR	Rho guanine nucleotide exchange factor 2	ARHGEF2	11.962	0.0080615	0.016564
O94772	3	1.48432	Hs 578T CTR	MDAMB231 CTR	Lymphocyte antigen 6H	LY6H	11.955	0.008073	0.016572
P83881	3	1.78641	Hs 578T CTR	MDAMB468 CTR	60S ribosomal protein L36a	RPL36A	11.919	0.0081306	0.016669
Q9H074	3	1.32768	Hs 578T CTR	MDAMB468 CTR	Polyadenylate-binding protein-interacting protein 1	PAIP1	11.917	0.008135	0.016669
P05455	17	1.48669	Hs 578T CTR	MDAMB231 CTR	Lupus La protein	SSB	11.884	0.008188	0.016753
P19793	4	1.98028	Hs 578T CTR	MDAMB468 CTR	Retinoic acid receptor RXR-alpha	RXRA	11.883	0.0081908	0.016753
P06756	15	2.69826	Hs 578T CTR	MDAMB231 CTR	Integrin alpha-V	ITGAV	11.874	0.0082044	0.016766
Q9NZW5	2	8.45426	MDAMB231 CTR	Hs 578T CTR	Protein PALS2	PALS2	11.854	0.0082385	0.01682
Q9HB07	7	1.71088	Hs 578T CTR	MDAMB468 CTR	MYG1 exonuclease	MYG1	11.846	0.0082521	0.016833
Q13867	7	1.57516	Hs 578T CTR	MDAMB468 CTR	Bleomycin hydrolase	BLMH	11.801	0.0083262	0.016941
Q13733	2	5.31303	MDAMB468 CTR	MDAMB231 CTR	Sodium/potassium-transporting ATPase subunit alpha-4	ATP1A4	11.801	0.0083263	0.016941
P42574	4	1.43666	MDAMB231 CTR	MDAMB468 CTR	Caspase-3	CASP3	11.8	0.008328	0.016941
P32322	7	1.48333	Hs 578T CTR	MDAMB231 CTR	Pyrroline-5-carboxylate reductase 1_ mitochondrial	PYCR1	11.791	0.0083448	0.01696
P48059	1	1.67959	MDAMB468 CTR	MDAMB231 CTR	LIM and senescent cell antigen-like-containing domain protein 1	LIMS1	11.737	0.0084365	0.017131
Q9P1U1	6	2.21585	MDAMB468 CTR	MDAMB231 CTR	Actin-related protein 3B	ACTR3B	11.678	0.0085376	0.017321
Q9GZS3	3	2.10191	MDAMB468 CTR	MDAMB231 CTR	WD repeat-containing protein 61	WDR61	11.659	0.0085721	0.017375
P55209	12	1.85346	MDAMB231 CTR	Hs 578T CTR	Nucleosome assembly protein 1-like 1	NAP1L1	11.626	0.0086289	0.017475
Q8WXX5	6	2.13863	MDAMB231 CTR	Hs 578T CTR	DnaJ homolog subfamily C member 9	DNAJC9	11.606	0.0086644	0.017531
Q6UB98	4	2.39729	MDAMB468 CTR	MDAMB231 CTR	Ankyrin repeat domain-containing protein 12	ANKRD12	11.561	0.0087455	0.017679
Q9NR30	26	1.41094	Hs 578T CTR	MDAMB231 CTR	Nucleolar RNA helicase 2	DDX21	11.498	0.0088602	0.017895
P08134	5	1.61198	Hs 578T CTR	MDAMB468 CTR	Rho-related GTP-binding protein RhoC	RHOC	11.492	0.0088708	0.017897
O14983	3	1.66979	Hs 578T CTR	MDAMB231 CTR	Sarcoplasmic/endoplasmic reticulum calcium ATPase 1	ATP2A1	11.489	0.008877	0.017897
Q9NYL9	13	1.38621	Hs 578T CTR	MDAMB231 CTR	Tropomodulin-3	TMOD3	11.483	0.0088877	0.017902
Q9UBB4	4	7.99577	MDAMB231 CTR	Hs 578T CTR	Ataxin-10	ATXN10	11.467	0.008918	0.017947
P54709	6	1.69289	Hs 578T CTR	MDAMB468 CTR	Sodium/potassium-transporting ATPase subunit beta-3	ATP1B3	11.444	0.0089605	0.018017
Q9UNQ2	1	7.03793	MDAMB231 CTR	Hs 578T CTR	Probable dimethyladenosine transferase	DIMT1	11.423	0.0089982	0.01807
P12277	11	1.45895	MDAMB468 CTR	Hs 578T CTR	Creatine kinase B-type	CKB	11.418	0.0090084	0.01807
Q9Y3B7	1	1.72293	MDAMB231 CTR	Hs 578T CTR	39S ribosomal protein L11_ mitochondrial	MRPL11	11.417	0.0090107	0.01807
P15104	6	2.51564	MDAMB231 CTR	Hs 578T CTR	Glutamine synthetase	GLUL	11.398	0.0090453	0.018123
Q9NRP0	1	3.11121	Hs 578T CTR	MDAMB231 CTR	Oligosaccharyltransferase complex subunit OSTC	OSTC	11.383	0.0090741	0.018164
Q14697	50	1.69558	Hs 578T CTR	MDAMB468 CTR	Neutral alpha-glucosidase AB	GANAB	11.376	0.0090874	0.018175
P41743	1	6.31313	MDAMB468 CTR	Hs 578T CTR	Protein kinase C iota type	PRKCI	11.361	0.0091161	0.018216
P00390	9	1.62421	MDAMB468 CTR	Hs 578T CTR	Glutathione reductase_ mitochondrial	GSR	11.302	0.0092287	0.018425
Q9Y2W1	4	1.57081	MDAMB468 CTR	Hs 578T CTR	Thyroid hormone receptor-associated protein 3	THRAP3	11.261	0.0093098	0.018561
P49756	10	1.68639	MDAMB231 CTR	MDAMB468 CTR	RNA-binding protein 25	RBM25	11.259	0.0093136	0.018561
Q9BSH4	2	15.9703	MDAMB231 CTR	Hs 578T CTR	Translational activator of cytochrome c oxidase 1	TACO1	11.246	0.0093385	0.018595
Q9UNL2	1	1.64177	Hs 578T CTR	MDAMB231 CTR	Translocon-associated protein subunit gamma	SSR3	11.224	0.0093822	0.018665
Q92804	7	1.40049	MDAMB231 CTR	Hs 578T CTR	TATA-binding protein-associated factor 2N	TAF15	11.212	0.0094068	0.018684
Q7Z4H8	4	1.9914	Hs 578T CTR	MDAMB468 CTR	Protein O-glucosyltransferase 3	POGLUT3	11.211	0.0094082	0.018684
P53004	7	4.74277	Hs 578T CTR	MDAMB231 CTR	Biliverdin reductase A	BLVRA	11.185	0.0094594	0.018769
P60468	3	1.40195	Hs 578T CTR	MDAMB231 CTR	Protein transport protein Sec61 subunit beta	SEC61B	11.152	0.0095252	0.018883
P28070	10	1.25964	MDAMB468 CTR	Hs 578T CTR	Proteasome subunit beta type-4	PSMB4	11.117	0.0095971	0.019009
P46108	2	1.64824	MDAMB231 CTR	MDAMB468 CTR	Adapter molecule crk	CRK	11.099	0.0096337	0.019065
Q13573	4	1.80862	MDAMB468 CTR	MDAMB231 CTR	SNW domain-containing protein 1	SNW1	11.083	0.0096663	0.019112
P50402	6	1.66335	Hs 578T CTR	MDAMB468 CTR	Emerin	EMD	11.057	0.0097213	0.019204
P61964	1	2.06557	MDAMB468 CTR	Hs 578T CTR	WD repeat-containing protein 5	WDR5	11.05	0.0097351	0.019215
Q13126	5	5.90389	MDAMB231 CTR	Hs 578T CTR	S-methyl-5'-thioadenosine phosphorylase	MTAP	11.024	0.0097896	0.019305
P19087	5	2.25995	MDAMB468 CTR	Hs 578T CTR	Guanine nucleotide-binding protein G(t) subunit alpha-2	GNAT2	11.018	0.0098011	0.019311
Q96DI7	1	2.53878	MDAMB468 CTR	Hs 578T CTR	U5 small nuclear ribonucleoprotein 40 kDa protein	SNRNP40	11.012	0.0098153	0.019322
Q9UKX3	12	2.31571	Hs 578T CTR	MDAMB231 CTR	Myosin-13	MYH13	11.005	0.0098301	0.019335
P49411	24	1.36143	MDAMB468 CTR	Hs 578T CTR	Elongation factor Tu_ mitochondrial	TUFM	10.976	0.0098901	0.019436
O95299	1	8.63192	MDAMB468 CTR	Hs 578T CTR	NADH dehydrogenase [ubiquinone] 1 alpha subcomplex subunit 10_ mitochondrial	NDUFA10	10.964	0.0099153	0.019448
O75643	49	1.29257	MDAMB468 CTR	Hs 578T CTR	U5 small nuclear ribonucleoprotein 200 kDa helicase	SNRNP200	10.961	0.009922	0.019448
Q5XKE5	4	1.28254	MDAMB468 CTR	MDAMB231 CTR	Keratin_ type II cytoskeletal 79	KRT79	10.961	0.0099224	0.019448
P11310	6	1.43616	MDAMB468 CTR	Hs 578T CTR	Medium-chain specific acyl-CoA dehydrogenase_ mitochondrial	ACADM	10.933	0.0099815	0.019547
Q92769	11	1.26265	MDAMB468 CTR	Hs 578T CTR	Histone deacetylase 2	HDAC2	10.921	0.010007	0.01958
O75477	6	1.75505	Hs 578T CTR	MDAMB468 CTR	Erlin-1	ERLIN1	10.889	0.010079	0.019703
Q3MII6	2	2.57594	MDAMB468 CTR	Hs 578T CTR	TBC1 domain family member 25	TBC1D25	10.871	0.010116	0.019738
Q9Y316	3	1.51734	Hs 578T CTR	MDAMB231 CTR	Protein MEMO1	MEMO1	10.871	0.010117	0.019738
Q86U42	2	2.1683	MDAMB468 CTR	Hs 578T CTR	Polyadenylate-binding protein 2	PABPN1	10.868	0.010124	0.019738
P04179	5	1.55402	MDAMB468 CTR	Hs 578T CTR	Superoxide dismutase [Mn]_ mitochondrial	SOD2	10.864	0.010131	0.019738
O43143	28	1.23657	MDAMB468 CTR	Hs 578T CTR	Pre-mRNA-splicing factor ATP-dependent RNA helicase DHX15	DHX15	10.852	0.010157	0.019772
Q14651	5	1.7962	MDAMB231 CTR	Hs 578T CTR	Plastin-1	PLS1	10.81	0.010251	0.019936
P19367	7	1.83026	Hs 578T CTR	MDAMB468 CTR	Hexokinase-1	HK1	10.796	0.010283	0.019981
Q08211	48	1.37985	MDAMB468 CTR	MDAMB231 CTR	ATP-dependent RNA helicase A	DHX9	10.785	0.010307	0.02001
Q8TF09	1	2.55273	MDAMB468 CTR	Hs 578T CTR	Dynein light chain roadblock-type 2	DYNLRB2	10.777	0.010326	0.020024
P19012	8	1.73092	Hs 578T CTR	MDAMB231 CTR	Keratin_ type I cytoskeletal 15	KRT15	10.774	0.010331	0.020024
Q9H3K6	1	9.09331	Hs 578T CTR	MDAMB468 CTR	BolA-like protein 2	BOLA2	10.762	0.01036	0.020061
O60763	20	1.51386	Hs 578T CTR	MDAMB231 CTR	General vesicular transport factor p115	USO1	10.735	0.010421	0.020163
P30419	10	1.38154	MDAMB231 CTR	Hs 578T CTR	Glycylpeptide N-tetradecanoyltransferase 1	NMT1	10.728	0.010437	0.020174
Q6FI81	5	1.3977	MDAMB468 CTR	MDAMB231 CTR	Anamorsin	CIAPIN1	10.724	0.010445	0.020174
Q01105	10	1.63547	MDAMB468 CTR	Hs 578T CTR	Protein SET	SET	10.714	0.010468	0.020203
Q92696	3	2.3919	MDAMB468 CTR	Hs 578T CTR	Geranylgeranyl transferase type-2 subunit alpha	RABGGTA	10.698	0.010506	0.020258
Q15008	11	1.5014	MDAMB231 CTR	MDAMB468 CTR	26S proteasome non-ATPase regulatory subunit 6	PSMD6	10.683	0.01054	0.020305
Q8IY67	4	1.75772	MDAMB468 CTR	Hs 578T CTR	Ribonucleoprotein PTB-binding 1	RAVER1	10.635	0.01065	0.0205
P62191	15	1.21987	MDAMB231 CTR	Hs 578T CTR	26S proteasome regulatory subunit 4	PSMC1	10.624	0.010677	0.020517
Q15382	1	2.56503	MDAMB231 CTR	Hs 578T CTR	GTP-binding protein Rheb	RHEB	10.624	0.010678	0.020517
P35659	10	1.56479	MDAMB468 CTR	Hs 578T CTR	Protein DEK	DEK	10.619	0.010688	0.020517
Q9H6T3	4	1.66829	Hs 578T CTR	MDAMB468 CTR	RNA polymerase II-associated protein 3	RPAP3	10.616	0.010695	0.020517
Q9BRT6	2	2.23107	MDAMB231 CTR	MDAMB468 CTR	Protein LLP homolog	LLPH	10.596	0.010742	0.02059
Q9NZ08	4	2.46085	MDAMB231 CTR	Hs 578T CTR	Endoplasmic reticulum aminopeptidase 1	ERAP1	10.578	0.010787	0.020658
Q5TZF3	1	1.31084	Hs 578T CTR	MDAMB231 CTR	Ankyrin repeat domain-containing protein 45	ANKRD45	10.572	0.0108	0.020665
P13716	1	1.70464	Hs 578T CTR	MDAMB231 CTR	Delta-aminolevulinic acid dehydratase	ALAD	10.55	0.010854	0.020743
Q9UMS4	18	3.00314	MDAMB468 CTR	Hs 578T CTR	Pre-mRNA-processing factor 19	PRPF19	10.547	0.010859	0.020743
P62753	13	1.55231	MDAMB468 CTR	MDAMB231 CTR	40S ribosomal protein S6	RPS6	10.537	0.010883	0.020761
O60361	4	3.29923	MDAMB231 CTR	MDAMB468 CTR	Putative nucleoside diphosphate kinase	NME2P1	10.536	0.010886	0.020761
O75365	1	2.09792	Hs 578T CTR	MDAMB231 CTR	Protein tyrosine phosphatase type IVA 3	PTP4A3	10.528	0.010906	0.02078
Q8N766	6	2.2529	MDAMB468 CTR	MDAMB231 CTR	ER membrane protein complex subunit 1	EMC1	10.49	0.011	0.020941
P09488	1	9.52038	MDAMB231 CTR	MDAMB468 CTR	Glutathione S-transferase Mu 1	GSTM1	10.473	0.01104	0.021001
Q99460	27	1.73683	Hs 578T CTR	MDAMB231 CTR	26S proteasome non-ATPase regulatory subunit 1	PSMD1	10.449	0.011098	0.021084
Q9Y3F4	12	1.4418	MDAMB468 CTR	MDAMB231 CTR	Serine-threonine kinase receptor-associated protein	STRAP	10.447	0.011103	0.021084
Q9P2J5	36	1.3442	Hs 578T CTR	MDAMB231 CTR	Leucine--tRNA ligase_ cytoplasmic	LARS1	10.441	0.011119	0.021097
P53007	5	1.39235	Hs 578T CTR	MDAMB468 CTR	Tricarboxylate transport protein_ mitochondrial	SLC25A1	10.43	0.011145	0.021123
Q96RS6	14	1.65826	MDAMB231 CTR	MDAMB468 CTR	NudC domain-containing protein 1	NUDCD1	10.428	0.011151	0.021123
Q9BXU8	2	1.66177	Hs 578T CTR	MDAMB231 CTR	Ferritin heavy polypeptide-like 17	FTHL17	10.408	0.011202	0.021175
P08865	14	1.43384	MDAMB468 CTR	MDAMB231 CTR	40S ribosomal protein SA	RPSA	10.403	0.011213	0.021175
Q14232	6	1.44994	MDAMB231 CTR	MDAMB468 CTR	Translation initiation factor eIF-2B subunit alpha	EIF2B1	10.402	0.011216	0.021175
Q9BUF5	17	1.89901	Hs 578T CTR	MDAMB468 CTR	Tubulin beta-6 chain	TUBB6	10.402	0.011217	0.021175
O00487	9	1.28787	Hs 578T CTR	MDAMB231 CTR	26S proteasome non-ATPase regulatory subunit 14	PSMD14	10.31	0.01145	0.021599
P54578	16	1.56247	MDAMB468 CTR	MDAMB231 CTR	Ubiquitin carboxyl-terminal hydrolase 14	USP14	10.27	0.011555	0.021778
Q12907	5	1.61631	Hs 578T CTR	MDAMB231 CTR	Vesicular integral-membrane protein VIP36	LMAN2	10.217	0.011694	0.022021
P62269	15	1.45998	Hs 578T CTR	MDAMB231 CTR	40S ribosomal protein S18	RPS18	10.209	0.011716	0.022045
P61006	3	1.59201	MDAMB468 CTR	Hs 578T CTR	Ras-related protein Rab-8A	RAB8A	10.192	0.01176	0.022109
P11908	5	2.16629	MDAMB468 CTR	Hs 578T CTR	Ribose-phosphate pyrophosphokinase 2	PRPS2	10.176	0.011803	0.022166
Q13247	10	1.3518	MDAMB468 CTR	MDAMB231 CTR	Serine/arginine-rich splicing factor 6	SRSF6	10.174	0.01181	0.022166
P00568	6	1.29981	MDAMB231 CTR	Hs 578T CTR	Adenylate kinase isoenzyme 1	AK1	10.157	0.011854	0.02223
Q9UDT6	4	1.64905	Hs 578T CTR	MDAMB231 CTR	CAP-Gly domain-containing linker protein 2	CLIP2	10.133	0.01192	0.022335
Q6WCQ1	3	3.14064	Hs 578T CTR	MDAMB231 CTR	Myosin phosphatase Rho-interacting protein	MPRIP	10.092	0.012033	0.022528
P08237	3	2.34125	MDAMB468 CTR	MDAMB231 CTR	ATP-dependent 6-phosphofructokinase_ muscle type	PFKM	10.069	0.012096	0.022616
O75344	2	1.72647	MDAMB468 CTR	MDAMB231 CTR	Inactive peptidyl-prolyl cis-trans isomerase FKBP6	FKBP6	10.068	0.0121	0.022616
P49773	6	1.62302	MDAMB468 CTR	MDAMB231 CTR	Adenosine 5'-monophosphoramidase HINT1	HINT1	10.063	0.012113	0.022623
Q07955	14	1.30387	MDAMB468 CTR	MDAMB231 CTR	Serine/arginine-rich splicing factor 1	SRSF1	10.037	0.012185	0.022726
Q14624	3	1.6107	Hs 578T CTR	MDAMB231 CTR	Inter-alpha-trypsin inhibitor heavy chain H4	ITIH4	10.036	0.012189	0.022726
Q9P0J0	5	1.66358	MDAMB468 CTR	Hs 578T CTR	NADH dehydrogenase [ubiquinone] 1 alpha subcomplex subunit 13	NDUFA13	10.021	0.01223	0.022745
P53675	20	1.17641	Hs 578T CTR	MDAMB468 CTR	Clathrin heavy chain 2	CLTCL1	10.02	0.012232	0.022745
P13747	3	4.09649	MDAMB231 CTR	MDAMB468 CTR	HLA class I histocompatibility antigen_ alpha chain E	HLA-E	10.02	0.012232	0.022745
Q14525	1	10.1781	MDAMB468 CTR	MDAMB231 CTR	Keratin_ type I cuticular Ha3-II	KRT33B	10.018	0.01224	0.022745
Q8WWY3	5	1.60977	MDAMB231 CTR	Hs 578T CTR	U4/U6 small nuclear ribonucleoprotein Prp31	PRPF31	9.9818	0.012341	0.022915
P42677	2	1.52139	MDAMB468 CTR	MDAMB231 CTR	40S ribosomal protein S27	RPS27	9.9318	0.012485	0.023163
Q9UKX2	1	1.98335	MDAMB468 CTR	Hs 578T CTR	Myosin-2	MYH2	9.9246	0.012506	0.023182
P49721	8	1.531	MDAMB468 CTR	Hs 578T CTR	Proteasome subunit beta type-2	PSMB2	9.8944	0.012594	0.023327
Q86W28	1	7.10045	MDAMB231 CTR	MDAMB468 CTR	NACHT_ LRR and PYD domains-containing protein 8	NLRP8	9.8826	0.012629	0.023372
Q9GIP4	2	1.82394	Hs 578T CTR	MDAMB231 CTR	Putative L-type amino acid transporter 1-like protein IMAA	SLC7A5P2	9.8766	0.012646	0.023385
Q9UNF0	6	3.47323	MDAMB468 CTR	Hs 578T CTR	Protein kinase C and casein kinase substrate in neurons protein 2	PACSIN2	9.8478	0.012731	0.023524
Q5JT25	1	1.99882	MDAMB468 CTR	MDAMB231 CTR	Ras-related protein Rab-41	RAB41	9.83	0.012785	0.023602
P52292	18	1.71059	MDAMB231 CTR	Hs 578T CTR	Importin subunit alpha-1	KPNA2	9.8214	0.01281	0.02363
P49591	22	1.35813	Hs 578T CTR	MDAMB231 CTR	Serine--tRNA ligase_ cytoplasmic	SARS1	9.8093	0.012846	0.023678
Q9H444	3	1.17842	MDAMB231 CTR	Hs 578T CTR	Charged multivesicular body protein 4b	CHMP4B	9.7935	0.012894	0.023746
P52565	8	2.24188	MDAMB231 CTR	MDAMB468 CTR	Rho GDP-dissociation inhibitor 1	ARHGDIA	9.7445	0.013044	0.024002
Q06323	14	1.50193	MDAMB231 CTR	Hs 578T CTR	Proteasome activator complex subunit 1	PSME1	9.7066	0.013161	0.024198
P28331	7	2.51813	MDAMB468 CTR	Hs 578T CTR	NADH-ubiquinone oxidoreductase 75 kDa subunit_ mitochondrial	NDUFS1	9.6829	0.013235	0.024314
Q9Y3B4	3	1.75026	MDAMB468 CTR	Hs 578T CTR	Splicing factor 3B subunit 6	SF3B6	9.6738	0.013263	0.024346
Q15642	12	1.50195	MDAMB231 CTR	Hs 578T CTR	Cdc42-interacting protein 4	TRIP10	9.6484	0.013343	0.024471
P61970	6	1.48762	Hs 578T CTR	MDAMB231 CTR	Nuclear transport factor 2	NUTF2	9.6437	0.013358	0.024471
P48556	7	1.89769	MDAMB231 CTR	Hs 578T CTR	26S proteasome non-ATPase regulatory subunit 8	PSMD8	9.6419	0.013364	0.024471
Q99618	2	1.88883	MDAMB231 CTR	MDAMB468 CTR	Cell division cycle-associated protein 3	CDCA3	9.6221	0.013427	0.024566
Q9Y277	5	1.86293	Hs 578T CTR	MDAMB468 CTR	Voltage-dependent anion-selective channel protein 3	VDAC3	9.5886	0.013534	0.024743
P55263	14	1.36722	MDAMB468 CTR	Hs 578T CTR	Adenosine kinase	ADK	9.5629	0.013618	0.024875
O00469	19	1.6001	Hs 578T CTR	MDAMB468 CTR	Procollagen-lysine_2-oxoglutarate 5-dioxygenase 2	PLOD2	9.4984	0.013829	0.025242
Q96EK6	4	2.80135	MDAMB468 CTR	Hs 578T CTR	Glucosamine 6-phosphate N-acetyltransferase	GNPNAT1	9.4868	0.013868	0.025292
Q8WZ74	4	1.30333	MDAMB468 CTR	MDAMB231 CTR	Cortactin-binding protein 2	CTTNBP2	9.4827	0.013882	0.025296
P48507	1	1.76823	Hs 578T CTR	MDAMB231 CTR	Glutamate--cysteine ligase regulatory subunit	GCLM	9.4755	0.013906	0.025319
P24539	6	1.44318	MDAMB468 CTR	Hs 578T CTR	ATP synthase F(0) complex subunit B1_ mitochondrial	ATP5PB	9.4292	0.014061	0.025583
O60610	7	2.25549	MDAMB231 CTR	Hs 578T CTR	Protein diaphanous homolog 1	DIAPH1	9.4219	0.014087	0.025608
Q96A33	8	1.48534	Hs 578T CTR	MDAMB468 CTR	PAT complex subunit CCDC47	CCDC47	9.4096	0.014128	0.025663
P25815	1	50.6674	MDAMB468 CTR	Hs 578T CTR	Protein S100-P	S100P	9.3712	0.01426	0.025865
Q9UGT4	7	2.12429	Hs 578T CTR	MDAMB231 CTR	Sushi domain-containing protein 2	SUSD2	9.3706	0.014262	0.025865
Q9BZZ5	13	1.5937	Hs 578T CTR	MDAMB231 CTR	Apoptosis inhibitor 5	API5	9.3561	0.014313	0.025916
Q8N7X1	2	2.15	Hs 578T CTR	MDAMB468 CTR	RNA-binding motif protein_ X-linked-like-3	RBMXL3	9.3558	0.014314	0.025916
P50579	2	10.8814	MDAMB231 CTR	Hs 578T CTR	Methionine aminopeptidase 2	METAP2	9.3365	0.014381	0.026017
Q9NVU7	1	10.4873	Hs 578T CTR	MDAMB231 CTR	Protein SDA1 homolog	SDAD1	9.3193	0.014441	0.026073
Q9BZX2	1	2.3892	MDAMB468 CTR	Hs 578T CTR	Uridine-cytidine kinase 2	UCK2	9.3187	0.014443	0.026073
Q9NR45	15	1.35072	MDAMB468 CTR	Hs 578T CTR	Sialic acid synthase	NANS	9.3178	0.014446	0.026073
Q9NYF8	3	1.65663	MDAMB468 CTR	Hs 578T CTR	Bcl-2-associated transcription factor 1	BCLAF1	9.2928	0.014535	0.026205
Q96HE7	20	1.47137	MDAMB231 CTR	Hs 578T CTR	ERO1-like protein alpha	ERO1A	9.2905	0.014543	0.026205
P62310	3	1.35714	MDAMB468 CTR	Hs 578T CTR	U6 snRNA-associated Sm-like protein LSm3	LSM3	9.2609	0.014649	0.026365
P62277	9	1.5263	MDAMB468 CTR	MDAMB231 CTR	40S ribosomal protein S13	RPS13	9.2586	0.014657	0.026365
Q16270	3	1.36438	Hs 578T CTR	MDAMB231 CTR	Insulin-like growth factor-binding protein 7	IGFBP7	9.2558	0.014667	0.026365
Q3SY69	7	2.17585	Hs 578T CTR	MDAMB231 CTR	Mitochondrial 10-formyltetrahydrofolate dehydrogenase	ALDH1L2	9.2221	0.014788	0.026529
P09012	1	1.43014	MDAMB468 CTR	MDAMB231 CTR	U1 small nuclear ribonucleoprotein A	SNRPA	9.2209	0.014793	0.026529
Q92928	1	34.0003	MDAMB231 CTR	Hs 578T CTR	Putative Ras-related protein Rab-1C	RAB1C	9.2208	0.014793	0.026529
Q99733	8	1.38511	Hs 578T CTR	MDAMB231 CTR	Nucleosome assembly protein 1-like 4	NAP1L4	9.213	0.014822	0.026559
P14868	24	1.55936	MDAMB468 CTR	Hs 578T CTR	Aspartate--tRNA ligase_ cytoplasmic	DARS1	9.198	0.014876	0.026616
Q66LE6	2	1.58606	MDAMB231 CTR	Hs 578T CTR	Serine/threonine-protein phosphatase 2A 55 kDa regulatory subunit B delta isoform	PPP2R2D	9.1978	0.014877	0.026616
P04156	2	2.96735	Hs 578T CTR	MDAMB468 CTR	Major prion protein	PRNP	9.1883	0.014912	0.026645
Q15185	7	1.36057	Hs 578T CTR	MDAMB468 CTR	Prostaglandin E synthase 3	PTGES3	9.187	0.014917	0.026645
Q14257	1	2.10571	Hs 578T CTR	MDAMB468 CTR	Reticulocalbin-2	RCN2	9.1672	0.01499	0.026754
P35580	30	1.48621	Hs 578T CTR	MDAMB231 CTR	Myosin-10	MYH10	9.1621	0.015009	0.026766
P15170	19	1.39227	MDAMB468 CTR	MDAMB231 CTR	Eukaryotic peptide chain release factor GTP-binding subunit ERF3A	GSPT1	9.1365	0.015104	0.02691
Q92542	2	15.5641	MDAMB468 CTR	Hs 578T CTR	Nicastrin	NCSTN	9.134	0.015113	0.02691
Q00536	3	1.24856	MDAMB468 CTR	Hs 578T CTR	Cyclin-dependent kinase 16	CDK16	9.0923	0.01527	0.027168
P62140	3	2.01948	Hs 578T CTR	MDAMB468 CTR	Serine/threonine-protein phosphatase PP1-beta catalytic subunit	PPP1CB	9.0597	0.015394	0.02736
Q9NQT8	3	1.39695	Hs 578T CTR	MDAMB468 CTR	Kinesin-like protein KIF13B	KIF13B	9.057	0.015404	0.02736
P20339	2	2.31087	MDAMB231 CTR	MDAMB468 CTR	Ras-related protein Rab-5A	RAB5A	9.0545	0.015414	0.02736
P31930	17	1.30404	MDAMB231 CTR	Hs 578T CTR	Cytochrome b-c1 complex subunit 1_ mitochondrial	UQCRC1	9.0307	0.015506	0.027483
Q5TEC6	5	1.50789	MDAMB468 CTR	MDAMB231 CTR	Histone HIST2H3PS2	H3-2	9.0301	0.015508	0.027483
P57088	6	1.53668	MDAMB468 CTR	Hs 578T CTR	Transmembrane protein 33	TMEM33	9.0158	0.015563	0.02756
Q9HCU5	3	1.51614	Hs 578T CTR	MDAMB231 CTR	Prolactin regulatory element-binding protein	PREB	9.0073	0.015597	0.027597
P24666	3	1.88456	MDAMB468 CTR	MDAMB231 CTR	Low molecular weight phosphotyrosine protein phosphatase	ACP1	9.003	0.015613	0.027605
P61758	6	1.87033	MDAMB231 CTR	Hs 578T CTR	Prefoldin subunit 3	VBP1	8.9808	0.0157	0.027737
Q9H0U4	12	1.54373	MDAMB468 CTR	MDAMB231 CTR	Ras-related protein Rab-1B	RAB1B	8.9649	0.015763	0.027826
P16104	5	1.31668	MDAMB468 CTR	MDAMB231 CTR	Histone H2AX	H2AX	8.9374	0.015872	0.027997
P62280	12	1.3544	Hs 578T CTR	MDAMB231 CTR	40S ribosomal protein S11	RPS11	8.9335	0.015887	0.028002
P42025	1	1.88628	MDAMB468 CTR	MDAMB231 CTR	Beta-centractin	ACTR1B	8.9288	0.015906	0.028013
P42224	17	1.63192	MDAMB468 CTR	MDAMB231 CTR	Signal transducer and activator of transcription 1-alpha/beta	STAT1	8.9132	0.015969	0.028102
Q9NR12	8	1.62838	Hs 578T CTR	MDAMB231 CTR	PDZ and LIM domain protein 7	PDLIM7	8.9032	0.016009	0.028142
P18031	14	1.46603	Hs 578T CTR	MDAMB468 CTR	Tyrosine-protein phosphatase non-receptor type 1	PTPN1	8.9013	0.016017	0.028142
Q9NUU7	1	1.64428	MDAMB468 CTR	Hs 578T CTR	ATP-dependent RNA helicase DDX19A	DDX19A	8.8901	0.016062	0.028185
O95747	10	1.67352	Hs 578T CTR	MDAMB468 CTR	Serine/threonine-protein kinase OSR1	OXSR1	8.8891	0.016066	0.028185
P39019	11	1.326	MDAMB468 CTR	Hs 578T CTR	40S ribosomal protein S19	RPS19	8.885	0.016083	0.028192
P25789	10	1.3742	MDAMB468 CTR	Hs 578T CTR	Proteasome subunit alpha type-4	PSMA4	8.8468	0.016239	0.028443
P08758	22	2.50561	MDAMB231 CTR	MDAMB468 CTR	Annexin A5	ANXA5	8.8437	0.016252	0.028444
P23919	2	1.97518	Hs 578T CTR	MDAMB468 CTR	Thymidylate kinase	DTYMK	8.8404	0.016266	0.028446
Q3ZCM7	3	1.45243	MDAMB231 CTR	Hs 578T CTR	Tubulin beta-8 chain	TUBB8	8.8118	0.016384	0.02863
Q58FF8	12	2.01811	MDAMB468 CTR	Hs 578T CTR	Putative heat shock protein HSP 90-beta 2	HSP90AB2P	8.8009	0.016429	0.028688
Q01081	7	1.58666	MDAMB468 CTR	MDAMB231 CTR	Splicing factor U2AF 35 kDa subunit	U2AF1	8.7963	0.016449	0.028699
P62851	5	1.6059	MDAMB468 CTR	MDAMB231 CTR	40S ribosomal protein S25	RPS25	8.7789	0.016522	0.028798
P06748	19	1.67279	MDAMB468 CTR	MDAMB231 CTR	Nucleophosmin	NPM1	8.7762	0.016533	0.028798
P34931	1	1.48341	MDAMB468 CTR	Hs 578T CTR	Heat shock 70 kDa protein 1-like	HSPA1L	8.7727	0.016547	0.028798
Q12798	3	3.32895	MDAMB231 CTR	Hs 578T CTR	Centrin-1	CETN1	8.7706	0.016556	0.028798
Q13114	3	3.53613	MDAMB231 CTR	MDAMB468 CTR	TNF receptor-associated factor 3	TRAF3	8.7662	0.016575	0.028808
O15144	10	1.78591	Hs 578T CTR	MDAMB468 CTR	Actin-related protein 2/3 complex subunit 2	ARPC2	8.7453	0.016664	0.02894
Q9NZM1	70	1.35137	MDAMB231 CTR	MDAMB468 CTR	Myoferlin	MYOF	8.7376	0.016696	0.028975
P63096	2	2.43066	MDAMB231 CTR	MDAMB468 CTR	Guanine nucleotide-binding protein G(i) subunit alpha-1	GNAI1	8.7298	0.01673	0.02901
Q9UDW3	1	241.038	Hs 578T CTR	MDAMB468 CTR	Zinc finger matrin-type protein 5	ZMAT5	8.6363	0.017136	0.029692
O96008	9	1.56334	Hs 578T CTR	MDAMB468 CTR	Mitochondrial import receptor subunit TOM40 homolog	TOMM40	8.6288	0.017169	0.029727
P34932	33	1.56029	MDAMB468 CTR	MDAMB231 CTR	Heat shock 70 kDa protein 4	HSPA4	8.6124	0.017243	0.029831
Q6P158	1	1.64269	MDAMB231 CTR	Hs 578T CTR	Putative ATP-dependent RNA helicase DHX57	DHX57	8.6021	0.017288	0.029887
Q13619	10	1.59401	MDAMB468 CTR	MDAMB231 CTR	Cullin-4A	CUL4A	8.5839	0.01737	0.030005
Q14116	3	3.97164	MDAMB231 CTR	MDAMB468 CTR	Interleukin-18	IL18	8.5463	0.01754	0.030276
Q6NUQ4	2	1.93822	MDAMB468 CTR	MDAMB231 CTR	Transmembrane protein 214	TMEM214	8.5142	0.017687	0.030507
P22061	6	1.35547	Hs 578T CTR	MDAMB231 CTR	Protein-L-isoaspartate(D-aspartate) O-methyltransferase	PCMT1	8.4983	0.017761	0.03061
P00367	23	1.33759	Hs 578T CTR	MDAMB468 CTR	Glutamate dehydrogenase 1_ mitochondrial	GLUD1	8.4838	0.017828	0.030703
Q5QNW6	5	1.45967	MDAMB468 CTR	MDAMB231 CTR	Histone H2B type 2-F	H2BC18	8.4529	0.017973	0.030928
P02461	7	2.8225	Hs 578T CTR	MDAMB231 CTR	Collagen alpha-1(III) chain	COL3A1	8.4329	0.018067	0.031067
Q03468	2	2.37316	Hs 578T CTR	MDAMB231 CTR	DNA excision repair protein ERCC-6	ERCC6	8.4273	0.018094	0.031089
P26640	34	1.31942	MDAMB231 CTR	Hs 578T CTR	Valine--tRNA ligase	VARS1	8.422	0.018119	0.031109
P12956	30	1.3111	MDAMB468 CTR	MDAMB231 CTR	X-ray repair cross-complementing protein 6	XRCC6	8.4187	0.018135	0.031112
P30837	12	2.3266	MDAMB231 CTR	MDAMB468 CTR	Aldehyde dehydrogenase X_ mitochondrial	ALDH1B1	8.4045	0.018203	0.031204
G2XKQ0	2	1.71706	MDAMB231 CTR	MDAMB468 CTR	Small ubiquitin-related modifier 5	SUMO1P1	8.3871	0.018286	0.031313
P14618	63	1.63254	Hs 578T CTR	MDAMB468 CTR	Pyruvate kinase PKM	PKM	8.3838	0.018302	0.031313
Q8IYS1	3	2.84423	MDAMB231 CTR	MDAMB468 CTR	Xaa-Arg dipeptidase	PM20D2	8.3826	0.018308	0.031313
P43246	15	1.39784	Hs 578T CTR	MDAMB231 CTR	DNA mismatch repair protein Msh2	MSH2	8.3702	0.018368	0.031392
P49366	5	6.92323	MDAMB231 CTR	Hs 578T CTR	Deoxyhypusine synthase	DHPS	8.3582	0.018426	0.031468
P56537	12	1.61014	MDAMB231 CTR	Hs 578T CTR	Eukaryotic translation initiation factor 6	EIF6	8.3185	0.018621	0.031776
P15880	17	1.34155	MDAMB468 CTR	MDAMB231 CTR	40S ribosomal protein S2	RPS2	8.2864	0.01878	0.032024
B2RPK0	1	1.70387	Hs 578T CTR	MDAMB231 CTR	Putative high mobility group protein B1-like 1	HMGB1P1	8.243	0.018999	0.032372
O43747	1	1.62132	MDAMB468 CTR	Hs 578T CTR	AP-1 complex subunit gamma-1	AP1G1	8.2141	0.019146	0.032598
Q8IZS8	1	2.24383	Hs 578T CTR	MDAMB468 CTR	Voltage-dependent calcium channel subunit alpha-2/delta-3	CACNA2D3	8.2094	0.01917	0.032614
Q5BJE1	1	3.17009	Hs 578T CTR	MDAMB468 CTR	Coiled-coil domain-containing protein 178	CCDC178	8.1865	0.019288	0.032791
P83916	3	1.36389	Hs 578T CTR	MDAMB468 CTR	Chromobox protein homolog 1	CBX1	8.1746	0.019349	0.03287
P38646	32	1.39664	MDAMB468 CTR	MDAMB231 CTR	Stress-70 protein_ mitochondrial	HSPA9	8.1649	0.0194	0.032931
O94760	11	1.6641	MDAMB468 CTR	MDAMB231 CTR	N(G)_N(G)-dimethylarginine dimethylaminohydrolase 1	DDAH1	8.1444	0.019507	0.033064
Q16698	5	1.39615	MDAMB231 CTR	MDAMB468 CTR	2_4-dienoyl-CoA reductase [(3E)-enoyl-CoA-producing]_ mitochondrial	DECR1	8.1444	0.019507	0.033064
Q8TC12	5	1.96847	Hs 578T CTR	MDAMB231 CTR	Retinol dehydrogenase 11	RDH11	8.1188	0.019642	0.033268
Q92598	33	1.50029	Hs 578T CTR	MDAMB231 CTR	Heat shock protein 105 kDa	HSPH1	8.1144	0.019666	0.033283
Q14165	6	2.42203	Hs 578T CTR	MDAMB231 CTR	Malectin	MLEC	8.1046	0.019718	0.033346
P33316	4	1.40745	MDAMB468 CTR	MDAMB231 CTR	Deoxyuridine 5'-triphosphate nucleotidohydrolase_ mitochondrial	DUT	8.1003	0.019741	0.033359
Q13404	5	1.52272	MDAMB231 CTR	MDAMB468 CTR	Ubiquitin-conjugating enzyme E2 variant 1	UBE2V1	8.0811	0.019843	0.033508
Q8N183	1	25.9907	MDAMB231 CTR	Hs 578T CTR	NADH dehydrogenase [ubiquinone] 1 alpha subcomplex assembly factor 2	NDUFAF2	8.0708	0.019899	0.033563
P43034	17	1.28023	MDAMB231 CTR	MDAMB468 CTR	Platelet-activating factor acetylhydrolase IB subunit beta	PAFAH1B1	8.0695	0.019906	0.033563
P30405	3	1.93009	MDAMB468 CTR	Hs 578T CTR	Peptidyl-prolyl cis-trans isomerase F_ mitochondrial	PPIF	8.0528	0.019996	0.03369
Q99729	11	2.00974	MDAMB468 CTR	Hs 578T CTR	Heterogeneous nuclear ribonucleoprotein A/B	HNRNPAB	8.0402	0.020064	0.033743
P55884	34	1.50502	MDAMB468 CTR	Hs 578T CTR	Eukaryotic translation initiation factor 3 subunit B	EIF3B	8.0397	0.020067	0.033743
P62330	3	5.32888	MDAMB231 CTR	Hs 578T CTR	ADP-ribosylation factor 6	ARF6	8.0383	0.020075	0.033743
Q9UI15	5	1.60169	Hs 578T CTR	MDAMB468 CTR	Transgelin-3	TAGLN3	8.036	0.020088	0.033743
P62745	2	2.05943	Hs 578T CTR	MDAMB231 CTR	Rho-related GTP-binding protein RhoB	RHOB	8.0122	0.020218	0.033938
P68366	4	3.81124	MDAMB231 CTR	MDAMB468 CTR	Tubulin alpha-4A chain	TUBA4A	7.9927	0.020326	0.034086
O75935	1	6.60556	MDAMB231 CTR	Hs 578T CTR	Dynactin subunit 3	DCTN3	7.9908	0.020337	0.034086
P08397	2	1.8641	MDAMB468 CTR	Hs 578T CTR	Porphobilinogen deaminase	HMBS	7.9603	0.020507	0.034346
Q9BPX5	5	1.70191	MDAMB231 CTR	Hs 578T CTR	Actin-related protein 2/3 complex subunit 5-like protein	ARPC5L	7.9503	0.020563	0.034414
P08887	1	6.16871	Hs 578T CTR	MDAMB468 CTR	Interleukin-6 receptor subunit alpha	IL6R	7.9463	0.020586	0.034426
P40227	24	1.61083	MDAMB468 CTR	Hs 578T CTR	T-complex protein 1 subunit zeta	CCT6A	7.9203	0.020733	0.034622
P15153	3	19.7237	MDAMB231 CTR	Hs 578T CTR	Ras-related C3 botulinum toxin substrate 2	RAC2	7.9202	0.020733	0.034622
Q16763	1	6.35778	MDAMB468 CTR	Hs 578T CTR	Ubiquitin-conjugating enzyme E2 S	UBE2S	7.8951	0.020877	0.034812
Q9NR56	1	1.85644	MDAMB231 CTR	MDAMB468 CTR	Muscleblind-like protein 1	MBNL1	7.895	0.020878	0.034812
Q96AB3	3	4.17388	MDAMB231 CTR	Hs 578T CTR	Isochorismatase domain-containing protein 2	ISOC2	7.8894	0.02091	0.03484
P15259	4	1.73917	MDAMB231 CTR	MDAMB468 CTR	Phosphoglycerate mutase 2	PGAM2	7.8626	0.021065	0.035072
Q96PF2	2	1.78412	Hs 578T CTR	MDAMB231 CTR	Testis-specific serine/threonine-protein kinase 2	TSSK2	7.8184	0.021324	0.035458
Q9C0C2	5	1.85553	MDAMB468 CTR	Hs 578T CTR	182 kDa tankyrase-1-binding protein	TNKS1BP1	7.8178	0.021328	0.035458
Q16539	5	3.16715	MDAMB231 CTR	Hs 578T CTR	Mitogen-activated protein kinase 14	MAPK14	7.798	0.021445	0.035627
Q7Z794	9	1.357	Hs 578T CTR	MDAMB231 CTR	Keratin_ type II cytoskeletal 1b	KRT77	7.7605	0.02167	0.035974
P62861	2	1.61511	MDAMB468 CTR	MDAMB231 CTR	40S ribosomal protein S30	FAU	7.7503	0.021732	0.036049
Q9NQG5	7	1.50816	MDAMB231 CTR	MDAMB468 CTR	Regulation of nuclear pre-mRNA domain-containing protein 1B	RPRD1B	7.7441	0.02177	0.036086
O00273	2	2.56886	Hs 578T CTR	MDAMB468 CTR	DNA fragmentation factor subunit alpha	DFFA	7.7405	0.021792	0.036095
P27707	3	1.4361	MDAMB468 CTR	Hs 578T CTR	Deoxycytidine kinase	DCK	7.7359	0.02182	0.036102
P08779	5	1.12756	MDAMB468 CTR	MDAMB231 CTR	Keratin_ type I cytoskeletal 16	KRT16	7.7345	0.021828	0.036102
O43765	7	1.52346	Hs 578T CTR	MDAMB468 CTR	Small glutamine-rich tetratricopeptide repeat-containing protein alpha	SGTA	7.7085	0.021988	0.036317
Q96PK6	11	1.16323	Hs 578T CTR	MDAMB231 CTR	RNA-binding protein 14	RBM14	7.7082	0.02199	0.036317
Q8IZP2	3	2.1959	MDAMB231 CTR	Hs 578T CTR	Putative protein FAM10A4	ST13P4	7.6941	0.022077	0.036389
Q9Y230	19	1.17408	Hs 578T CTR	MDAMB231 CTR	RuvB-like 2	RUVBL2	7.6933	0.022081	0.036389
P23381	14	1.47462	Hs 578T CTR	MDAMB468 CTR	Tryptophan--tRNA ligase_ cytoplasmic	WARS1	7.6932	0.022082	0.036389
Q00796	6	1.83184	Hs 578T CTR	MDAMB231 CTR	Sorbitol dehydrogenase	SORD	7.6898	0.022103	0.036398
Q10567	7	2.88543	MDAMB231 CTR	MDAMB468 CTR	AP-1 complex subunit beta-1	AP1B1	7.663	0.02227	0.036646
Q96CB9	1	9.85912	MDAMB468 CTR	Hs 578T CTR	5-methylcytosine rRNA methyltransferase NSUN4	NSUN4	7.6534	0.022331	0.036719
Q9Y3T9	5	1.71076	MDAMB468 CTR	MDAMB231 CTR	Nucleolar complex protein 2 homolog	NOC2L	7.6213	0.022534	0.037026
P31942	6	1.54685	MDAMB468 CTR	MDAMB231 CTR	Heterogeneous nuclear ribonucleoprotein H3	HNRNPH3	7.605	0.022638	0.037169
Q9NRW7	3	1.55032	MDAMB231 CTR	MDAMB468 CTR	Vacuolar protein sorting-associated protein 45	VPS45	7.5675	0.022879	0.03752
Q92499	20	1.51005	Hs 578T CTR	MDAMB468 CTR	ATP-dependent RNA helicase DDX1	DDX1	7.5668	0.022884	0.03752
Q96GD3	3	1.25146	MDAMB468 CTR	Hs 578T CTR	Polycomb protein SCMH1	SCMH1	7.5559	0.022955	0.0376
O14787	6	2.64616	MDAMB231 CTR	MDAMB468 CTR	Transportin-2	TNPO2	7.5541	0.022967	0.0376
P61086	6	1.49779	Hs 578T CTR	MDAMB468 CTR	Ubiquitin-conjugating enzyme E2 K	UBE2K	7.5475	0.02301	0.037644
Q99832	28	1.41543	MDAMB468 CTR	Hs 578T CTR	T-complex protein 1 subunit eta	CCT7	7.5449	0.023027	0.037644
Q8NCI6	1	1.57055	MDAMB231 CTR	Hs 578T CTR	Beta-galactosidase-1-like protein 3	GLB1L3	7.5234	0.023169	0.037848
P37108	7	1.58791	MDAMB468 CTR	Hs 578T CTR	Signal recognition particle 14 kDa protein	SRP14	7.5066	0.02328	0.038002
Q96MX6	1	2.23088	Hs 578T CTR	MDAMB231 CTR	Dynein axonemal assembly factor 10	DNAAF10	7.4862	0.023416	0.038196
P50995	6	1.24513	MDAMB468 CTR	MDAMB231 CTR	Annexin A11	ANXA11	7.4689	0.023532	0.038359
P51805	6	1.37585	Hs 578T CTR	MDAMB468 CTR	Plexin-A3	PLXNA3	7.4645	0.023562	0.03838
Q8NB90	6	2.02127	MDAMB231 CTR	MDAMB468 CTR	ATPase family protein 2 homolog	SPATA5	7.4251	0.02383	0.038788
O75352	1	6.00391	MDAMB231 CTR	MDAMB468 CTR	Mannose-P-dolichol utilization defect 1 protein	MPDU1	7.4031	0.023981	0.039006
P51148	7	1.64552	Hs 578T CTR	MDAMB468 CTR	Ras-related protein Rab-5C	RAB5C	7.3773	0.024161	0.03927
P61026	5	1.89408	MDAMB468 CTR	Hs 578T CTR	Ras-related protein Rab-10	RAB10	7.3668	0.024234	0.039361
P42695	2	2.72722	MDAMB468 CTR	Hs 578T CTR	Condensin-2 complex subunit D3	NCAPD3	7.3535	0.024328	0.039485
P09543	3	3.05927	MDAMB231 CTR	MDAMB468 CTR	2'_3'-cyclic-nucleotide 3'-phosphodiesterase	CNP	7.3401	0.024423	0.03961
P10644	8	1.90198	Hs 578T CTR	MDAMB231 CTR	cAMP-dependent protein kinase type I-alpha regulatory subunit	PRKAR1A	7.326	0.024522	0.039743
Q9Y314	2	1.81699	MDAMB468 CTR	MDAMB231 CTR	Nitric oxide synthase-interacting protein	NOSIP	7.2966	0.024733	0.040056
P46778	6	1.49673	MDAMB468 CTR	MDAMB231 CTR	60S ribosomal protein L21	RPL21	7.2873	0.0248	0.040136
Q86X55	1	1.64992	Hs 578T CTR	MDAMB468 CTR	Histone-arginine methyltransferase CARM1	CARM1	7.2668	0.02495	0.040349
Q9ULH0	2	1.58848	Hs 578T CTR	MDAMB231 CTR	Kinase D-interacting substrate of 220 kDa	KIDINS220	7.2621	0.024983	0.040374
P52815	6	1.3533	MDAMB231 CTR	Hs 578T CTR	39S ribosomal protein L12_ mitochondrial	MRPL12	7.2589	0.025007	0.040384
P07737	15	1.77665	Hs 578T CTR	MDAMB468 CTR	Profilin-1	PFN1	7.2485	0.025083	0.040478
Q8IZS6	1	17.5395	MDAMB468 CTR	MDAMB231 CTR	Dynein light chain Tctex-type protein 2	DYNLT2	7.2176	0.025312	0.040817
Q9H2U2	10	1.33199	MDAMB468 CTR	MDAMB231 CTR	Inorganic pyrophosphatase 2_ mitochondrial	PPA2	7.1851	0.025555	0.041179
Q9H3F6	2	2.40371	Hs 578T CTR	MDAMB468 CTR	BTB/POZ domain-containing adapter for CUL3-mediated RhoA degradation protein 3	KCTD10	7.1823	0.025575	0.041184
Q9BVG3	3	3.77128	MDAMB231 CTR	Hs 578T CTR	E3 ubiquitin-protein ligase TRIM62	TRIM62	7.1755	0.025627	0.041237
P50395	35	1.40967	Hs 578T CTR	MDAMB231 CTR	Rab GDP dissociation inhibitor beta	GDI2	7.1705	0.025665	0.041268
P47914	4	1.49682	MDAMB468 CTR	MDAMB231 CTR	60S ribosomal protein L29	RPL29	7.1672	0.02569	0.041279
P11279	8	1.67611	MDAMB468 CTR	MDAMB231 CTR	Lysosome-associated membrane glycoprotein 1	LAMP1	7.161	0.025737	0.041326
P62081	14	1.51728	MDAMB468 CTR	MDAMB231 CTR	40S ribosomal protein S7	RPS7	7.1354	0.025932	0.04161
Q96T76	8	2.21628	MDAMB231 CTR	Hs 578T CTR	MMS19 nucleotide excision repair protein homolog	MMS19	7.1259	0.026005	0.041697
P53618	31	1.28945	Hs 578T CTR	MDAMB231 CTR	Coatomer subunit beta	COPB1	7.1153	0.026087	0.041799
P55795	6	1.21184	MDAMB231 CTR	Hs 578T CTR	Heterogeneous nuclear ribonucleoprotein H2	HNRNPH2	7.0883	0.026298	0.042106
A6NKP2	1	1.3489	MDAMB231 CTR	MDAMB468 CTR	Putative short-chain dehydrogenase/reductase family 42E member 2	SDR42E2	7.0746	0.026404	0.042247
P51649	1	31.9023	MDAMB468 CTR	MDAMB231 CTR	Succinate-semialdehyde dehydrogenase_ mitochondrial	ALDH5A1	7.0553	0.026557	0.042439
Q13363	2	2.19487	Hs 578T CTR	MDAMB231 CTR	C-terminal-binding protein 1	CTBP1	7.0547	0.026562	0.042439
Q6AHZ1	1	33.1042	MDAMB468 CTR	MDAMB231 CTR	Zinc finger protein 518A	ZNF518A	7.0397	0.026681	0.0426
O94776	7	1.56865	MDAMB231 CTR	Hs 578T CTR	Metastasis-associated protein MTA2	MTA2	7.0221	0.026822	0.042786
Q8TD10	2	1.48411	Hs 578T CTR	MDAMB231 CTR	Mirror-image polydactyly gene 1 protein	MIPOL1	7.0203	0.026836	0.042786
P41250	30	1.29085	MDAMB468 CTR	MDAMB231 CTR	Glycine--tRNA ligase	GARS1	6.9764	0.027192	0.043323
P40616	6	2.83985	MDAMB231 CTR	Hs 578T CTR	ADP-ribosylation factor-like protein 1	ARL1	6.9561	0.027359	0.043558
Q7Z434	3	1.27844	MDAMB468 CTR	Hs 578T CTR	Mitochondrial antiviral-signaling protein	MAVS	6.9524	0.027389	0.043575
Q7Z7C8	1	2.27528	MDAMB231 CTR	Hs 578T CTR	Transcription initiation factor TFIID subunit 8	TAF8	6.9252	0.027615	0.043903
Q92930	2	2.05216	MDAMB231 CTR	MDAMB468 CTR	Ras-related protein Rab-8B	RAB8B	6.923	0.027634	0.043903
Q6PCT2	1	7.71387	Hs 578T CTR	MDAMB468 CTR	F-box/LRR-repeat protein 19	FBXL19	6.9161	0.027692	0.043963
Q9BQA1	4	2.0927	MDAMB231 CTR	Hs 578T CTR	Methylosome protein 50	WDR77	6.8353	0.028379	0.045024
P60866	7	1.31038	Hs 578T CTR	MDAMB231 CTR	40S ribosomal protein S20	RPS20	6.8258	0.028461	0.045068
Q9HCM2	4	2.54009	MDAMB231 CTR	Hs 578T CTR	Plexin-A4	PLXNA4	6.8252	0.028467	0.045068
Q9NSB2	10	1.39186	Hs 578T CTR	MDAMB231 CTR	Keratin_ type II cuticular Hb4	KRT84	6.8252	0.028467	0.045068
P17693	4	1.59487	MDAMB231 CTR	MDAMB468 CTR	HLA class I histocompatibility antigen_ alpha chain G	HLA-G	6.8119	0.028583	0.045219
Q14344	4	1.76012	MDAMB468 CTR	Hs 578T CTR	Guanine nucleotide-binding protein subunit alpha-13	GNA13	6.8039	0.028652	0.045277
A5PKW4	2	1.70121	Hs 578T CTR	MDAMB468 CTR	PH and SEC7 domain-containing protein 1	PSD	6.8031	0.028659	0.045277
Q8NFI4	1	2.50925	Hs 578T CTR	MDAMB468 CTR	Putative protein FAM10A5	ST13P5	6.7882	0.028791	0.045453
Q9NTK5	15	1.30695	MDAMB468 CTR	MDAMB231 CTR	Obg-like ATPase 1	OLA1	6.7692	0.02896	0.045687
Q5JS54	2	6.41088	MDAMB231 CTR	Hs 578T CTR	Proteasome assembly chaperone 4	PSMG4	6.7649	0.028997	0.045715
Q86UP2	36	1.25975	MDAMB231 CTR	MDAMB468 CTR	Kinectin	KTN1	6.7564	0.029073	0.045803
P54577	22	1.47225	Hs 578T CTR	MDAMB231 CTR	Tyrosine--tRNA ligase_ cytoplasmic	YARS1	6.753	0.029103	0.045818
Q08752	2	1.51269	MDAMB468 CTR	MDAMB231 CTR	Peptidyl-prolyl cis-trans isomerase D	PPID	6.7238	0.029367	0.0462
P24298	2	3.49039	MDAMB468 CTR	Hs 578T CTR	Alanine aminotransferase 1	GPT	6.7182	0.029418	0.046248
P61247	18	1.35323	MDAMB468 CTR	MDAMB231 CTR	40S ribosomal protein S3a	RPS3A	6.7071	0.029519	0.046375
P10599	6	1.39028	MDAMB231 CTR	MDAMB468 CTR	Thioredoxin	TXN	6.6785	0.029781	0.046708
Q6PL18	5	1.95469	Hs 578T CTR	MDAMB231 CTR	ATPase family AAA domain-containing protein 2	ATAD2	6.6778	0.029788	0.046708
P61513	3	1.62159	MDAMB468 CTR	Hs 578T CTR	60S ribosomal protein L37a	RPL37A	6.6754	0.029809	0.046708
P07900	44	1.5094	MDAMB468 CTR	Hs 578T CTR	Heat shock protein HSP 90-alpha	HSP90AA1	6.675	0.029814	0.046708
Q15363	4	2.26434	Hs 578T CTR	MDAMB468 CTR	Transmembrane emp24 domain-containing protein 2	TMED2	6.6635	0.02992	0.046842
P22079	1	6.17914	MDAMB468 CTR	Hs 578T CTR	Lactoperoxidase	LPO	6.6447	0.030095	0.047083
P60510	4	1.34697	MDAMB468 CTR	Hs 578T CTR	Serine/threonine-protein phosphatase 4 catalytic subunit	PPP4C	6.6404	0.030135	0.047114
P05386	2	1.58597	Hs 578T CTR	MDAMB231 CTR	60S acidic ribosomal protein P1	RPLP1	6.61	0.030422	0.047529
P46459	9	1.36586	Hs 578T CTR	MDAMB231 CTR	Vesicle-fusing ATPase	NSF	6.6044	0.030475	0.047579
Q01968	1	1.46567	Hs 578T CTR	MDAMB468 CTR	Inositol polyphosphate 5-phosphatase OCRL	OCRL	6.6017	0.030502	0.047588
P46937	9	1.53768	Hs 578T CTR	MDAMB231 CTR	Transcriptional coactivator YAP1	YAP1	6.5844	0.030667	0.047813
Q5SSJ5	2	1.95484	MDAMB231 CTR	MDAMB468 CTR	Heterochromatin protein 1-binding protein 3	HP1BP3	6.5686	0.030819	0.04801
Q9UKM9	8	1.26899	MDAMB468 CTR	MDAMB231 CTR	RNA-binding protein Raly	RALY	6.5663	0.030841	0.04801
P78417	5	1.76511	MDAMB231 CTR	MDAMB468 CTR	Glutathione S-transferase omega-1	GSTO1	6.5646	0.030858	0.04801
Q9H9B4	3	1.96926	MDAMB231 CTR	Hs 578T CTR	Sideroflexin-1	SFXN1	6.5403	0.031094	0.048345
Q02543	14	1.33381	MDAMB468 CTR	Hs 578T CTR	60S ribosomal protein L18a	RPL18A	6.5202	0.031292	0.048618
Q96N77	1	2.4403	MDAMB468 CTR	MDAMB231 CTR	Zinc finger protein 641	ZNF641	6.4906	0.031585	0.049019
Q9UPZ6	1	1.4981	MDAMB231 CTR	Hs 578T CTR	Thrombospondin type-1 domain-containing protein 7A	THSD7A	6.4898	0.031593	0.049019
Q9Y6N5	13	1.60541	MDAMB468 CTR	MDAMB231 CTR	Sulfide:quinone oxidoreductase_ mitochondrial	SQOR	6.4808	0.031683	0.049125
Q8NBX0	7	9.95634	MDAMB468 CTR	Hs 578T CTR	Saccharopine dehydrogenase-like oxidoreductase	SCCPDH	6.4409	0.032086	0.049716
O43567	1	1.66014	MDAMB468 CTR	MDAMB231 CTR	E3 ubiquitin-protein ligase RNF13	RNF13	6.4383	0.032113	0.049723
Q9BV57	5	1.65777	MDAMB468 CTR	MDAMB231 CTR	1_2-dihydroxy-3-keto-5-methylthiopentene dioxygenase	ADI1	6.4283	0.032216	0.049829
P61009	1	3.27882	MDAMB231 CTR	MDAMB468 CTR	Signal peptidase complex subunit 3	SPCS3	6.4273	0.032226	0.049829
Q14137	6	7.45549	MDAMB231 CTR	Hs 578T CTR	Ribosome biogenesis protein BOP1	BOP1	6.4155	0.032347	0.049943
P30084	11	1.68884	Hs 578T CTR	MDAMB231 CTR	Enoyl-CoA hydratase_ mitochondrial	ECHS1	6.414	0.032363	0.049943
O75526	4	1.87813	Hs 578T CTR	MDAMB231 CTR	RNA-binding motif protein_ X-linked-like-2	RBMXL2	6.4137	0.032366	0.049943

## Sheet: Table S2
Table S2 Intracellular DEPs after NCT-503 treatment at IC20
CellLine	UniprotID	GeneID	Description	Peptides number	Highest condition	FC (NCTVSCTR)	logFC	raw.pval
Hs 578T	Q6P6B7	ANKRD16	Ankyrin repeat domain-containing protein 16	2	NCT	6.7942	0.832138	0.038489
Hs 578T	O15523	DDX3Y	ATP-dependent RNA helicase DDX3Y	2	NCT	5.3107	0.725152	0.0096788
Hs 578T	P38606	ATP6V1A	V-type proton ATPase catalytic subunit A	10	NCT	4.3115	0.634628	0.0017475
Hs 578T	P48059	LIMS1	LIM and senescent cell antigen-like-containing domain protein 1	1	NCT	2.5943	0.41402	0.019962
Hs 578T	Q9H6D7	HAUS4	HAUS augmin-like complex subunit 4	3	NCT	2.5717	0.41022	0.048016
Hs 578T	O75533	SF3B1	Splicing factor 3B subunit 1	1	NCT	1.7748	0.249149	0.011306
Hs 578T	Q92882	OSTF1	Osteoclast-stimulating factor 1	2	NCT	1.7537	0.243955	0.035392
Hs 578T	Q5JQC4	CT47A1	Cancer/testis antigen 47A	1	NCT	1.6812	0.225619	0.0019683
Hs 578T	Q9Y3Y2	CHTOP	Chromatin target of PRMT1 protein	1	NCT	1.6403	0.214923	0.024361
Hs 578T	O00231	PSMD11	26S proteasome non-ATPase regulatory subunit 11	17	NCT	1.5564	0.192121	0.029306
Hs 578T	P49915	GMPS	GMP synthase [glutamine-hydrolyzing]	18	NCT	1.5179	0.181243	0.048473
Hs 578T	P09104	ENO2	Gamma-enolase	5	NCT	1.5035	0.177103	0.040159
Hs 578T	Q13541	EIF4EBP1	Eukaryotic translation initiation factor 4E-binding protein 1	3	NCT	1.3981	0.145538	0.026021
Hs 578T	P43243	MATR3	Matrin-3	14	NCT	1.3933	0.144045	0.020382
Hs 578T	P10412	H1-4	Histone H1.4	3	NCT	1.3606	0.13373	0.049616
Hs 578T	Q6PIV7	SLC25A34	Solute carrier family 25 member 34	4	NCT	1.359	0.133219	0.040453
Hs 578T	P54136	RARS1	Arginine--tRNA ligase_ cytoplasmic	18	NCT	1.3462	0.12911	0.042765
Hs 578T	Q86UX7	FERMT3	Fermitin family homolog 3	3	NCT	1.3267	0.122773	0.048768
Hs 578T	P23634	ATP2B4	Plasma membrane calcium-transporting ATPase 4	3	NCT	1.3026	0.114811	0.025564
Hs 578T	P09471	GNAO1	Guanine nucleotide-binding protein G(o) subunit alpha	1	NCT	1.2545	0.0984707	0.020505
Hs 578T	Q6UB98	ANKRD12	Ankyrin repeat domain-containing protein 12	4	NCT	1.2475	0.0960406	0.033189
Hs 578T	Q08211	DHX9	ATP-dependent RNA helicase A	30	NCT	1.2243	0.0878878	0.027208
Hs 578T	P17844	DDX5	Probable ATP-dependent RNA helicase DDX5	13	CTR	0.78318	-0.106138	0.0054904
Hs 578T	Q99439	CNN2	Calponin-2	11	CTR	0.78111	-0.107288	0.021109
Hs 578T	Q96S97	MYADM	Myeloid-associated differentiation marker	3	CTR	0.76942	-0.113837	0.016476
Hs 578T	O00469	PLOD2	Procollagen-lysine_2-oxoglutarate 5-dioxygenase 2	15	CTR	0.74516	-0.12775	0.01825
Hs 578T	P07951	TPM2	Tropomyosin beta chain	4	CTR	0.70839	-0.149728	0.0018046
Hs 578T	P0CG38	POTEI	POTE ankyrin domain family member I	2	CTR	0.69938	-0.155287	0.00071515
Hs 578T	P60033	CD81	CD81 antigen	2	CTR	0.69718	-0.156655	0.0092178
Hs 578T	P09493	TPM1	Tropomyosin alpha-1 chain	8	CTR	0.69498	-0.158028	0.0041493
Hs 578T	P21291	CSRP1	Cysteine and glycine-rich protein 1	5	CTR	0.67711	-0.169341	0.0084707
Hs 578T	O00244	ATOX1	Copper transport protein ATOX1	1	CTR	0.61521	-0.210977	0.018034
Hs 578T	Q96RU7	TRIB3	Tribbles homolog 3	1	CTR	0.58579	-0.232258	0.0017353
Hs 578T	Q92896	GLG1	Golgi apparatus protein 1	5	CTR	0.55934	-0.252324	0.011395
Hs 578T	O75051	PLXNA2	Plexin-A2	1	CTR	0.41563	-0.381293	0.030152
Hs 578T	Q01581	HMGCS1	Hydroxymethylglutaryl-CoA synthase_ cytoplasmic	3	CTR	0.3557	-0.448916	0.016191
Hs 578T	Q9Y547	HSPB11	Intraflagellar transport protein 25 homolog	1	CTR	0.31773	-0.497942	0.029346
Hs 578T	P09622	DLD	Dihydrolipoyl dehydrogenase_ mitochondrial	2	CTR	0.14452	-0.840072	0.00010591
Hs 578T	P02461	COL3A1	Collagen alpha-1(III) chain	8	CTR	0.11639	-0.934084	0.038513
Hs 578T	P08123	COL1A2	Collagen alpha-2(I) chain	7	CTR	0.033519	-1.47471	0.014025
MDA-MB-231	P27482	CALML3	Calmodulin-like protein 3	1	NCT	10.826	1.03447	9.9954e-05
MDA-MB-231	P30038	ALDH4A1	Delta-1-pyrroline-5-carboxylate dehydrogenase_ mitochondrial	1	NCT	2.779	0.443889	0.0077467
MDA-MB-231	Q96LZ3	PPP3R2	Calcineurin subunit B type 2	1	NCT	1.9644	0.29323	0.0074662
MDA-MB-231	Q92522	H1-10	Histone H1.10	2	NCT	1.9213	0.283595	0.011262
MDA-MB-231	Q13541	EIF4EBP1	Eukaryotic translation initiation factor 4E-binding protein 1	3	NCT	1.7765	0.249565	0.014996
MDA-MB-231	A6NCW7	USP17L4	Inactive ubiquitin carboxyl-terminal hydrolase 17-like protein 4	1	NCT	1.6517	0.217931	0.043307
MDA-MB-231	Q9BQB4	SOST	Sclerostin	2	NCT	1.4748	0.168733	0.0052421
MDA-MB-231	P43490	NAMPT	Nicotinamide phosphoribosyltransferase	24	NCT	1.4549	0.162833	0.0069526
MDA-MB-231	P01033	TIMP1	Metalloproteinase inhibitor 1	2	NCT	1.4476	0.160649	0.0275
MDA-MB-231	Q14376	GALE	UDP-glucose 4-epimerase	10	NCT	1.3613	0.133954	0.0078371
MDA-MB-231	Q3KQV9	UAP1L1	UDP-N-acetylhexosamine pyrophosphorylase-like protein 1	7	NCT	1.2821	0.107922	0.031493
MDA-MB-231	P38117	ETFB	Electron transfer flavoprotein subunit beta	4	NCT	1.28	0.10721	0.041826
MDA-MB-231	Q96GA7	SDSL	Serine dehydratase-like	2	NCT	1.2694	0.103598	0.023733
MDA-MB-231	Q13501	SQSTM1	Sequestosome-1	11	NCT	1.2608	0.100646	0.022279
MDA-MB-231	Q15005	SPCS2	Signal peptidase complex subunit 2	2	NCT	1.2546	0.0985053	0.022145
MDA-MB-231	Q99623	PHB2	Prohibitin-2	11	NCT	1.2505	0.0970837	0.034262
MDA-MB-231	Q9UDW3	ZMAT5	Zinc finger matrin-type protein 5	1	NCT	1.2403	0.0935267	0.023586
MDA-MB-231	P29317	EPHA2	Ephrin type-A receptor 2	20	NCT	1.2389	0.0930363	0.049455
MDA-MB-231	P10809	HSPD1	60 kDa heat shock protein_ mitochondrial	46	NCT	1.2344	0.0914559	0.046384
MDA-MB-231	P41250	GARS1	Glycine--tRNA ligase	31	NCT	1.226	0.0884905	0.0049554
MDA-MB-231	P07237	P4HB	Protein disulfide-isomerase	35	NCT	1.2216	0.086929	0.036372
MDA-MB-231	Q9Y3B3	TMED7	Transmembrane emp24 domain-containing protein 7	5	NCT	1.2084	0.0822107	0.030908
MDA-MB-231	P0DP23	CALM1	Calmodulin-1	6	NCT	1.2064	0.0814913	0.017435
MDA-MB-231	Q13155	AIMP2	Aminoacyl tRNA synthase complex-interacting multifunctional protein 2	6	NCT	1.2044	0.0807707	0.0011241
MDA-MB-231	P35232	PHB	Prohibitin	15	NCT	1.2028	0.0801934	0.0037974
MDA-MB-231	Q92974	ARHGEF2	Rho guanine nucleotide exchange factor 2	24	NCT	1.2021	0.0799406	0.0079976
MDA-MB-231	P04181	OAT	Ornithine aminotransferase_ mitochondrial	11	CTR	0.82921	-0.0813355	0.044895
MDA-MB-231	P49915	GMPS	GMP synthase [glutamine-hydrolyzing]	17	CTR	0.8224	-0.0849169	0.034394
MDA-MB-231	Q96TA1	NIBAN2	Protein Niban 2	17	CTR	0.82132	-0.0854876	0.047739
MDA-MB-231	P27635	RPL10	60S ribosomal protein L10	9	CTR	0.8195	-0.086451	0.013026
MDA-MB-231	Q15003	NCAPH	Condensin complex subunit 2	12	CTR	0.808	-0.0925886	0.030553
MDA-MB-231	Q02818	NUCB1	Nucleobindin-1	6	CTR	0.79949	-0.097187	0.0087405
MDA-MB-231	P46060	RANGAP1	Ran GTPase-activating protein 1	16	CTR	0.79204	-0.101253	0.023888
MDA-MB-231	P17844	DDX5	Probable ATP-dependent RNA helicase DDX5	15	CTR	0.77579	-0.110256	0.039991
MDA-MB-231	Q96M83	CCDC7	Coiled-coil domain-containing protein 7	3	CTR	0.7716	-0.112608	0.040771
MDA-MB-231	P80303	NUCB2	Nucleobindin-2	3	CTR	0.76933	-0.113887	0.032292
MDA-MB-231	P63208	SKP1	S-phase kinase-associated protein 1	5	CTR	0.76686	-0.115284	0.046457
MDA-MB-231	P06493	CDK1	Cyclin-dependent kinase 1	12	CTR	0.75745	-0.120646	0.013156
MDA-MB-231	P31689	DNAJA1	DnaJ homolog subfamily A member 1	7	CTR	0.75615	-0.121392	0.0053291
MDA-MB-231	P20290	BTF3	Transcription factor BTF3	11	CTR	0.74248	-0.129315	0.012657
MDA-MB-231	Q9BQE5	APOL2	Apolipoprotein L2	2	CTR	0.72692	-0.138513	0.048199
MDA-MB-231	Q9C0D0	PHACTR1	Phosphatase and actin regulator 1	1	CTR	0.72677	-0.138603	0.020049
MDA-MB-231	P63313	TMSB10	Thymosin beta-10	1	CTR	0.71664	-0.144699	0.03056
MDA-MB-231	P33992	MCM5	DNA replication licensing factor MCM5	12	CTR	0.71497	-0.145712	0.012915
MDA-MB-231	P22413	ENPP1	Ectonucleotide pyrophosphatase/phosphodiesterase family member 1	1	CTR	0.71035	-0.148528	0.046899
MDA-MB-231	O14929	HAT1	Histone acetyltransferase type B catalytic subunit	1	CTR	0.6978	-0.156269	0.0056997
MDA-MB-231	P04792	HSPB1	Heat shock protein beta-1	11	CTR	0.69397	-0.158659	0.0088524
MDA-MB-231	P61916	NPC2	NPC intracellular cholesterol transporter 2	2	CTR	0.69366	-0.158853	0.022765
MDA-MB-231	P82909	MRPS36	28S ribosomal protein S36_ mitochondrial	1	CTR	0.66957	-0.174204	0.031139
MDA-MB-231	O00560	SDCBP	Syntenin-1	2	CTR	0.66698	-0.175887	0.029072
MDA-MB-231	O94776	MTA2	Metastasis-associated protein MTA2	7	CTR	0.66682	-0.175991	0.021517
MDA-MB-231	Q9NUP9	LIN7C	Protein lin-7 homolog C	1	CTR	0.66515	-0.17708	0.003079
MDA-MB-231	Q96A23	CPNE4	Copine-4	2	CTR	0.65733	-0.182217	0.017558
MDA-MB-231	P42892	ECE1	Endothelin-converting enzyme 1	2	CTR	0.65723	-0.182283	0.01225
MDA-MB-231	P25205	MCM3	DNA replication licensing factor MCM3	10	CTR	0.6532	-0.184954	0.0020703
MDA-MB-231	Q13418	ILK	Integrin-linked protein kinase	2	CTR	0.59315	-0.226835	0.025266
MDA-MB-231	Q14444	CAPRIN1	Caprin-1	9	CTR	0.56945	-0.244544	0.011349
MDA-MB-231	Q9NQW6	ANLN	Anillin	6	CTR	0.56936	-0.244613	0.0031015
MDA-MB-231	O95817	BAG3	BAG family molecular chaperone regulator 3	7	CTR	0.56655	-0.246762	0.010145
MDA-MB-231	P52292	KPNA2	Importin subunit alpha-1	17	CTR	0.52835	-0.277078	0.010293
MDA-MB-231	P09622	DLD	Dihydrolipoyl dehydrogenase_ mitochondrial	9	CTR	0.48158	-0.317332	0.00022906
MDA-MB-231	Q05682	CALD1	Caldesmon	5	CTR	0.47744	-0.321081	0.0020169
MDA-MB-231	Q96IX5	ATP5MK	ATP synthase membrane subunit K_ mitochondrial	1	CTR	0.47147	-0.326546	0.024682
MDA-MB-231	P24844	MYL9	Myosin regulatory light polypeptide 9	1	CTR	0.46318	-0.33425	0.025983
MDA-MB-231	P10606	COX5B	Cytochrome c oxidase subunit 5B_ mitochondrial	1	CTR	0.43615	-0.360364	0.011127
MDA-MB-231	O43237	DYNC1LI2	Cytoplasmic dynein 1 light intermediate chain 2	6	CTR	0.42546	-0.371141	0.027076
MDA-MB-231	P14174	MIF	Macrophage migration inhibitory factor	4	CTR	0.40761	-0.389755	0.047858
MDA-MB-231	P23921	RRM1	Ribonucleoside-diphosphate reductase large subunit	7	CTR	0.38634	-0.41303	0.00056413
MDA-MB-231	P41743	PRKCI	Protein kinase C iota type	1	CTR	0.38373	-0.415974	0.04671
MDA-MB-231	Q9H9J2	MRPL44	39S ribosomal protein L44_ mitochondrial	1	CTR	0.37071	-0.430966	0.0072039
MDA-MB-231	Q96KB5	PBK	Lymphokine-activated killer T-cell-originated protein kinase	1	CTR	0.22943	-0.63935	0.014133
MDA-MB-468	P20718	GZMH	Granzyme H	1	NCT	5.0591	0.704073	0.047615
MDA-MB-468	Q15843	NEDD8	NEDD8	1	NCT	3.7928	0.57896	0.021372
MDA-MB-468	Q16829	DUSP7	Dual specificity protein phosphatase 7	1	NCT	3.419	0.533899	0.0068669
MDA-MB-468	A4D2B8	PMS2P1	Putative postmeiotic segregation increased 2-like protein 1	1	NCT	3.2248	0.508503	0.022418
MDA-MB-468	Q8TAA3	PSMA8	Proteasome subunit alpha-type 8	3	NCT	2.9274	0.466482	0.012325
MDA-MB-468	P23141	CES1	Liver carboxylesterase 1	4	NCT	2.5927	0.413752	0.0046159
MDA-MB-468	Q9H6D7	HAUS4	HAUS augmin-like complex subunit 4	1	NCT	2.4903	0.396252	0.019456
MDA-MB-468	P49257	LMAN1	Protein ERGIC-53	1	NCT	2.4018	0.380537	0.0028383
MDA-MB-468	Q96G03	PGM2	Phosphoglucomutase-2	6	NCT	2.2623	0.35455	0.030181
MDA-MB-468	Q8N2A0	LINC00269	Putative uncharacterized protein encoded by LINC00269	1	NCT	2.1415	0.330718	0.017219
MDA-MB-468	P49821	NDUFV1	NADH dehydrogenase [ubiquinone] flavoprotein 1_ mitochondrial	2	NCT	2.1131	0.32492	0.0026802
MDA-MB-468	Q9BW27	NUP85	Nuclear pore complex protein Nup85	1	NCT	2.0568	0.313192	0.0055421
MDA-MB-468	Q16822	PCK2	Phosphoenolpyruvate carboxykinase [GTP]_ mitochondrial	7	NCT	1.9456	0.289054	0.012703
MDA-MB-468	A5A3E0	POTEF	POTE ankyrin domain family member F	1	NCT	1.9385	0.287466	0.03722
MDA-MB-468	Q8N7B9	EFCAB3	EF-hand calcium-binding domain-containing protein 3	5	NCT	1.9123	0.281556	0.0088811
MDA-MB-468	Q6AHZ1	ZNF518A	Zinc finger protein 518A	3	NCT	1.905	0.279895	0.0088571
MDA-MB-468	P52895	AKR1C2	Aldo-keto reductase family 1 member C2	4	NCT	1.8211	0.260334	0.0097839
MDA-MB-468	Q6IAA8	LAMTOR1	Ragulator complex protein LAMTOR1	1	NCT	1.8162	0.259164	0.021671
MDA-MB-468	Q9BUX1	CHAC1	Glutathione-specific gamma-glutamylcyclotransferase 1	1	NCT	1.6389	0.214552	0.04521
MDA-MB-468	P13637	ATP1A3	Sodium/potassium-transporting ATPase subunit alpha-3	1	NCT	1.6378	0.214261	0.011148
MDA-MB-468	P16444	DPEP1	Dipeptidase 1	3	NCT	1.617	0.20871	0.014379
MDA-MB-468	P35900	KRT20	Keratin_ type I cytoskeletal 20	3	NCT	1.6055	0.20561	0.01007
MDA-MB-468	P24298	GPT	Alanine aminotransferase 1	4	NCT	1.5501	0.19036	0.039579
MDA-MB-468	A6NHL2	TUBAL3	Tubulin alpha chain-like 3	4	NCT	1.5466	0.189378	0.047409
MDA-MB-468	P15374	UCHL3	Ubiquitin carboxyl-terminal hydrolase isozyme L3	7	NCT	1.5465	0.18935	0.001479
MDA-MB-468	P36776	LONP1	Lon protease homolog_ mitochondrial	7	NCT	1.5212	0.182186	0.020464
MDA-MB-468	Q9NZ72	STMN3	Stathmin-3	1	NCT	1.5031	0.176988	0.0038411
MDA-MB-468	P53004	BLVRA	Biliverdin reductase A	7	NCT	1.4805	0.170408	0.034891
MDA-MB-468	Q9BSJ8	ESYT1	Extended synaptotagmin-1	9	NCT	1.4804	0.170379	0.017926
MDA-MB-468	O94760	DDAH1	N(G)_N(G)-dimethylarginine dimethylaminohydrolase 1	7	NCT	1.4754	0.16891	0.0022316
MDA-MB-468	Q9BSU3	NAA11	N-alpha-acetyltransferase 11	2	NCT	1.4655	0.165986	0.046431
MDA-MB-468	Q06124	PTPN11	Tyrosine-protein phosphatase non-receptor type 11	2	NCT	1.4535	0.162415	0.0060608
MDA-MB-468	P05062	ALDOB	Fructose-bisphosphate aldolase B	5	NCT	1.4325	0.156095	0.022826
MDA-MB-468	Q6ZMR3	LDHAL6A	L-lactate dehydrogenase A-like 6A	2	NCT	1.4203	0.15238	0.005524
MDA-MB-468	Q92947	GCDH	Glutaryl-CoA dehydrogenase_ mitochondrial	2	NCT	1.4146	0.150634	0.0080354
MDA-MB-468	P10321	HLA-C	HLA class I histocompatibility antigen_ C alpha chain	3	NCT	1.4065	0.14814	0.028227
MDA-MB-468	P15927	RPA2	Replication protein A 32 kDa subunit	6	NCT	1.3939	0.144232	0.020987
MDA-MB-468	O60763	USO1	General vesicular transport factor p115	7	NCT	1.39	0.143015	0.017097
MDA-MB-468	Q16881	TXNRD1	Thioredoxin reductase 1_ cytoplasmic	12	NCT	1.3876	0.142264	0.0013412
MDA-MB-468	Q14651	PLS1	Plastin-1	6	NCT	1.3821	0.140539	0.0047861
MDA-MB-468	Q8NBJ5	COLGALT1	Procollagen galactosyltransferase 1	7	NCT	1.3784	0.139375	0.0032915
MDA-MB-468	Q8IUI4	SNX29P2	Putative protein SNX29P2	1	NCT	1.3642	0.134878	0.013711
MDA-MB-468	O75251	NDUFS7	NADH dehydrogenase [ubiquinone] iron-sulfur protein 7_ mitochondrial	2	NCT	1.3592	0.133283	0.045936
MDA-MB-468	Q14974	KPNB1	Importin subunit beta-1	26	NCT	1.3591	0.133251	0.0065205
MDA-MB-468	Q9BWF3	RBM4	RNA-binding protein 4	5	NCT	1.3468	0.129303	0.020108
MDA-MB-468	Q9UKA9	PTBP2	Polypyrimidine tract-binding protein 2	2	NCT	1.3438	0.128335	0.018035
MDA-MB-468	Q9BYZ2	LDHAL6B	L-lactate dehydrogenase A-like 6B	4	NCT	1.3377	0.126359	0.0183
MDA-MB-468	P30613	PKLR	Pyruvate kinase PKLR	6	NCT	1.3149	0.118893	0.0165
MDA-MB-468	P68400	CSNK2A1	Casein kinase II subunit alpha	10	NCT	1.3134	0.118397	0.012985
MDA-MB-468	Q13363	CTBP1	C-terminal-binding protein 1	1	NCT	1.3114	0.117735	0.041076
MDA-MB-468	P41250	GARS1	Glycine--tRNA ligase	30	NCT	1.2996	0.11381	0.044648
MDA-MB-468	O15160	POLR1C	DNA-directed RNA polymerases I and III subunit RPAC1	1	NCT	1.287	0.109579	0.024718
MDA-MB-468	Q99536	VAT1	Synaptic vesicle membrane protein VAT-1 homolog	5	NCT	1.2852	0.108971	0.0091557
MDA-MB-468	O15212	PFDN6	Prefoldin subunit 6	3	NCT	1.2837	0.108464	0.040053
MDA-MB-468	P31930	UQCRC1	Cytochrome b-c1 complex subunit 1_ mitochondrial	14	NCT	1.2769	0.106157	0.016766
MDA-MB-468	P35232	PHB	Prohibitin	19	NCT	1.276	0.105851	0.0080133
MDA-MB-468	P35520	CBS	Cystathionine beta-synthase	6	NCT	1.2711	0.10418	0.0039676
MDA-MB-468	P35609	ACTN2	Alpha-actinin-2	6	NCT	1.2649	0.102056	0.0011587
MDA-MB-468	P07858	CTSB	Cathepsin B	2	NCT	1.2594	0.100164	0.025191
MDA-MB-468	Q9Y224	RTRAF	RNA transcription_ translation and transport factor protein	7	NCT	1.2583	0.0997842	0.0011522
MDA-MB-468	P60891	PRPS1	Ribose-phosphate pyrophosphokinase 1	11	NCT	1.2507	0.0971531	0.0097766
MDA-MB-468	Q9UBQ7	GRHPR	Glyoxylate reductase/hydroxypyruvate reductase	7	NCT	1.2503	0.0970142	0.009952
MDA-MB-468	Q96E39	RBMXL1	RNA binding motif protein_ X-linked-like-1	3	NCT	1.2477	0.0961102	0.025354
MDA-MB-468	Q5BJE1	CCDC178	Coiled-coil domain-containing protein 178	3	NCT	1.246	0.095518	0.020242
MDA-MB-468	P13804	ETFA	Electron transfer flavoprotein subunit alpha_ mitochondrial	9	NCT	1.2379	0.0926856	0.0039872
MDA-MB-468	P09972	ALDOC	Fructose-bisphosphate aldolase C	8	NCT	1.2225	0.0872489	0.035085
MDA-MB-468	Q9NR28	DIABLO	Diablo homolog_ mitochondrial	4	NCT	1.2217	0.0869646	0.01131
MDA-MB-468	P53007	SLC25A1	Tricarboxylate transport protein_ mitochondrial	6	NCT	1.2016	0.0797599	0.020005
MDA-MB-468	P10644	PRKAR1A	cAMP-dependent protein kinase type I-alpha regulatory subunit	5	CTR	0.8264	-0.0828097	0.0048973
MDA-MB-468	O43684	BUB3	Mitotic checkpoint protein BUB3	7	CTR	0.82634	-0.0828412	0.034854
MDA-MB-468	P23246	SFPQ	Splicing factor_ proline- and glutamine-rich	22	CTR	0.82628	-0.0828728	0.049228
MDA-MB-468	Q9HAV4	XPO5	Exportin-5	11	CTR	0.82281	-0.0847004	0.045647
MDA-MB-468	Q92688	ANP32B	Acidic leucine-rich nuclear phosphoprotein 32 family member B	7	CTR	0.81371	-0.0895303	0.035919
MDA-MB-468	P43487	RANBP1	Ran-specific GTPase-activating protein	5	CTR	0.81122	-0.0908614	0.019967
MDA-MB-468	Q9Y6C9	MTCH2	Mitochondrial carrier homolog 2	6	CTR	0.80895	-0.0920783	0.036882
MDA-MB-468	Q9NSB4	KRT82	Keratin_ type II cuticular Hb2	4	CTR	0.80731	-0.0929597	0.013813
MDA-MB-468	Q99584	S100A13	Protein S100-A13	2	CTR	0.80338	-0.095079	0.022827
MDA-MB-468	Q9BTT0	ANP32E	Acidic leucine-rich nuclear phosphoprotein 32 family member E	1	CTR	0.8004	-0.0966929	0.048631
MDA-MB-468	Q14444	CAPRIN1	Caprin-1	15	CTR	0.79842	-0.0977686	0.014505
MDA-MB-468	Q01085	TIAL1	Nucleolysin TIAR	3	CTR	0.79062	-0.102032	0.025917
MDA-MB-468	Q13148	TARDBP	TAR DNA-binding protein 43	7	CTR	0.78683	-0.104119	0.048533
MDA-MB-468	O14880	MGST3	Microsomal glutathione S-transferase 3	3	CTR	0.78536	-0.104931	0.045615
MDA-MB-468	Q8WXX5	DNAJC9	DnaJ homolog subfamily C member 9	5	CTR	0.77981	-0.108011	0.015351
MDA-MB-468	O14745	SLC9A3R1	Na(+)/H(+) exchange regulatory cofactor NHE-RF1	7	CTR	0.77879	-0.10858	0.042564
MDA-MB-468	Q12874	SF3A3	Splicing factor 3A subunit 3	12	CTR	0.77383	-0.111354	0.0089818
MDA-MB-468	P25205	MCM3	DNA replication licensing factor MCM3	12	CTR	0.77146	-0.112687	0.031557
MDA-MB-468	O43768	ENSA	Alpha-endosulfine	2	CTR	0.76967	-0.113695	0.045161
MDA-MB-468	O60716	CTNND1	Catenin delta-1	17	CTR	0.76683	-0.115301	0.031231
MDA-MB-468	Q92526	CCT6B	T-complex protein 1 subunit zeta-2	3	CTR	0.76486	-0.116418	0.027393
MDA-MB-468	P06493	CDK1	Cyclin-dependent kinase 1	9	CTR	0.76156	-0.118296	0.019521
MDA-MB-468	P12036	NEFH	Neurofilament heavy polypeptide	3	CTR	0.76097	-0.118632	0.0031799
MDA-MB-468	O15355	PPM1G	Protein phosphatase 1G	11	CTR	0.76071	-0.118781	0.037657
MDA-MB-468	O75934	BCAS2	Pre-mRNA-splicing factor SPF27	2	CTR	0.75617	-0.121381	0.0028
MDA-MB-468	P63151	PPP2R2A	Serine/threonine-protein phosphatase 2A 55 kDa regulatory subunit B alpha isoform	7	CTR	0.75245	-0.123522	0.020702
MDA-MB-468	O60739	EIF1B	Eukaryotic translation initiation factor 1b	2	CTR	0.75131	-0.124181	0.015738
MDA-MB-468	O43396	TXNL1	Thioredoxin-like protein 1	5	CTR	0.74811	-0.126035	0.024304
MDA-MB-468	Q96CW1	AP2M1	AP-2 complex subunit mu	3	CTR	0.74567	-0.127453	0.026579
MDA-MB-468	Q9NYY3	PLK2	Serine/threonine-protein kinase PLK2	2	CTR	0.74279	-0.129134	0.023691
MDA-MB-468	Q96FQ6	S100A16	Protein S100-A16	6	CTR	0.74117	-0.130082	0.024759
MDA-MB-468	P29966	MARCKS	Myristoylated alanine-rich C-kinase substrate	6	CTR	0.73541	-0.13347	0.049753
MDA-MB-468	P55145	MANF	Mesencephalic astrocyte-derived neurotrophic factor	3	CTR	0.73414	-0.134221	0.038964
MDA-MB-468	Q8NFV4	ABHD11	Protein ABHD11	1	CTR	0.73305	-0.134866	0.031045
MDA-MB-468	Q9UBE0	SAE1	SUMO-activating enzyme subunit 1	8	CTR	0.72255	-0.141132	0.04929
MDA-MB-468	Q9Y314	NOSIP	Nitric oxide synthase-interacting protein	1	CTR	0.72199	-0.141469	0.020469
MDA-MB-468	O96015	DNAL4	Dynein axonemal light chain 4	1	CTR	0.71365	-0.146515	0.037966
MDA-MB-468	Q9GZP4	PITHD1	PITH domain-containing protein 1	4	CTR	0.71291	-0.146965	0.0035632
MDA-MB-468	Q13409	DYNC1I2	Cytoplasmic dynein 1 intermediate chain 2	6	CTR	0.70897	-0.149372	0.0049173
MDA-MB-468	Q16186	ADRM1	Proteasomal ubiquitin receptor ADRM1	3	CTR	0.70382	-0.152538	0.020802
MDA-MB-468	Q9Y6E2	BZW2	Basic leucine zipper and W2 domain-containing protein 2	6	CTR	0.67666	-0.169629	0.039233
MDA-MB-468	P55795	HNRNPH2	Heterogeneous nuclear ribonucleoprotein H2	7	CTR	0.67173	-0.172805	0.0023176
MDA-MB-468	P31350	RRM2	Ribonucleoside-diphosphate reductase subunit M2	5	CTR	0.67132	-0.17307	0.0034894
MDA-MB-468	Q9UI15	TAGLN3	Transgelin-3	3	CTR	0.66993	-0.173971	0.010444
MDA-MB-468	Q9NS86	LANCL2	LanC-like protein 2	15	CTR	0.66824	-0.175068	0.0047083
MDA-MB-468	P14174	MIF	Macrophage migration inhibitory factor	4	CTR	0.65948	-0.180798	0.0092686
MDA-MB-468	Q15286	RAB35	Ras-related protein Rab-35	3	CTR	0.65035	-0.186853	0.0099526
MDA-MB-468	Q96CS3	FAF2	FAS-associated factor 2	2	CTR	0.6502	-0.186953	0.039089
MDA-MB-468	P08240	SRPRA	Signal recognition particle receptor subunit alpha	7	CTR	0.64962	-0.187341	0.0405
MDA-MB-468	P08590	MYL3	Myosin light chain 3	5	CTR	0.64342	-0.191505	0.0079449
MDA-MB-468	P19784	CSNK2A2	Casein kinase II subunit alpha'	2	CTR	0.61951	-0.207952	0.017596
MDA-MB-468	Q8WXF1	PSPC1	Paraspeckle component 1	5	CTR	0.61816	-0.208899	0.016989
MDA-MB-468	Q8IY67	RAVER1	Ribonucleoprotein PTB-binding 1	4	CTR	0.60935	-0.215133	0.0006629
MDA-MB-468	Q15427	SF3B4	Splicing factor 3B subunit 4	2	CTR	0.59507	-0.225432	0.01718
MDA-MB-468	Q8IUE6	H2AC21	Histone H2A type 2-B	3	CTR	0.59234	-0.227429	0.016512
MDA-MB-468	P06132	UROD	Uroporphyrinogen decarboxylase	2	CTR	0.58163	-0.235353	0.0016518
MDA-MB-468	Q01581	HMGCS1	Hydroxymethylglutaryl-CoA synthase_ cytoplasmic	8	CTR	0.56064	-0.251316	0.00074311
MDA-MB-468	Q9NX14	NDUFB11	NADH dehydrogenase [ubiquinone] 1 beta subcomplex subunit 11_ mitochondrial	1	CTR	0.55627	-0.254714	0.0098208
MDA-MB-468	Q92882	OSTF1	Osteoclast-stimulating factor 1	2	CTR	0.55182	-0.258203	0.018131
MDA-MB-468	Q9BQ39	DDX50	ATP-dependent RNA helicase DDX50	1	CTR	0.53486	-0.27176	0.04316
MDA-MB-468	P35527	KRT9	Keratin_ type I cytoskeletal 9	9	CTR	0.53424	-0.272264	0.011588
MDA-MB-468	P09132	SRP19	Signal recognition particle 19 kDa protein	1	CTR	0.51345	-0.289502	0.013019
MDA-MB-468	Q14919	DRAP1	Dr1-associated corepressor	1	CTR	0.49696	-0.303679	0.029362
MDA-MB-468	P30837	ALDH1B1	Aldehyde dehydrogenase X_ mitochondrial	3	CTR	0.45452	-0.342447	0.0058342
MDA-MB-468	Q13907	IDI1	Isopentenyl-diphosphate Delta-isomerase 1	5	CTR	0.45069	-0.346122	0.0076298
MDA-MB-468	Q6EEV6	SUMO4	Small ubiquitin-related modifier 4	1	CTR	0.44618	-0.35049	0.048272
MDA-MB-468	Q6P1J9	CDC73	Parafibromin	2	CTR	0.40017	-0.397755	0.0049663
MDA-MB-468	Q8IYB3	SRRM1	Serine/arginine repetitive matrix protein 1	2	CTR	0.39214	-0.406559	0.020451
MDA-MB-468	Q9UQ16	DNM3	Dynamin-3	1	CTR	0.33529	-0.474579	0.00084727
MDA-MB-468	O14519	CDK2AP1	Cyclin-dependent kinase 2-associated protein 1	1	CTR	0.32988	-0.481644	0.020329

## Sheet: Table S3
Table S3 Secreted differentially expressed proteins (DEPs) after NCT-503 treatment at IC20
CellLine	UniprotID	GeneID	Description	Peptides number	Highest condition	FC (NCTVSCTR)	logFC	raw.pval
Hs 578T	Q8N0Y7	PGAM4	Probable phosphoglycerate mutase 4	1	NCT	31.501	1.49832	3.994e-05
Hs 578T	P29966	MARCKS	Myristoylated alanine-rich C-kinase substrate	4	NCT	22.815	1.35822	0.00069836
Hs 578T	P05387	RPLP2	60S acidic ribosomal protein P2	5	NCT	13.472	1.12943	6.8408e-06
Hs 578T	P06454	PTMA	Prothymosin alpha	3	NCT	9.4257	0.974314	0.024111
Hs 578T	Q9UKY7	CDV3	Protein CDV3 homolog	3	NCT	8.7698	0.94299	0.0040653
Hs 578T	P82979	SARNP	SAP domain-containing ribonucleoprotein	2	NCT	8.2897	0.918539	0.0032073
Hs 578T	Q9NQP4	PFDN4	Prefoldin subunit 4	1	NCT	8.1758	0.91253	0.012494
Hs 578T	Q9UMX0	UBQLN1	Ubiquilin-1	3	NCT	7.1174	0.852321	0.0015414
Hs 578T	Q6PEY2	TUBA3E	Tubulin alpha-3E chain	1	NCT	7.0439	0.847813	0.0081937
Hs 578T	P29692	EEF1D	Elongation factor 1-delta	7	NCT	6.9928	0.844651	0.00043096
Hs 578T	Q96C90	PPP1R14B	Protein phosphatase 1 regulatory subunit 14B	1	NCT	6.7717	0.830698	0.0010886
Hs 578T	P0DPH7	TUBA3C	Tubulin alpha-3C chain	1	NCT	6.6364	0.821933	0.025287
Hs 578T	Q96C19	EFHD2	EF-hand domain-containing protein D2	3	NCT	6.5511	0.816314	0.0062304
Hs 578T	O60361	NME2P1	Putative nucleoside diphosphate kinase	2	NCT	6.4373	0.808704	0.0026794
Hs 578T	P05386	RPLP1	60S acidic ribosomal protein P1	2	NCT	6.3324	0.801568	0.014348
Hs 578T	Q13442	PDAP1	28 kDa heat- and acid-stable phosphoprotein	1	NCT	5.7539	0.759962	0.011008
Hs 578T	P49458	SRP9	Signal recognition particle 9 kDa protein	1	NCT	5.5334	0.742992	3.48e-05
Hs 578T	Q9UNZ2	NSFL1C	NSFL1 cofactor p47	4	NCT	5.5229	0.742167	0.00023705
Hs 578T	P43487	RANBP1	Ran-specific GTPase-activating protein	3	NCT	5.4538	0.736699	0.00029465
Hs 578T	P07951	TPM2	Tropomyosin beta chain	5	NCT	5.4222	0.734176	0.005069
Hs 578T	P24534	EEF1B2	Elongation factor 1-beta	4	NCT	5.3299	0.726719	0.00069391
Hs 578T	P68363	TUBA1B	Tubulin alpha-1B chain	10	NCT	5.3003	0.7243	0.0011408
Hs 578T	P02795	MT2A	Metallothionein-2	1	NCT	5.2487	0.720052	0.048529
Hs 578T	Q71U36	TUBA1A	Tubulin alpha-1A chain	2	NCT	5.2447	0.719721	0.0026823
Hs 578T	P67936	TPM4	Tropomyosin alpha-4 chain	18	NCT	5.1754	0.713944	0.0010601
Hs 578T	P54727	RAD23B	UV excision repair protein RAD23 homolog B	3	NCT	5.1725	0.7137	0.0050718
Hs 578T	P58546	MTPN	Myotrophin	1	NCT	5.0849	0.706282	0.0073246
Hs 578T	Q9Y2Z0	SUGT1	Protein SGT1 homolog	3	NCT	4.5658	0.659517	0.0023114
Hs 578T	O43399	TPD52L2	Tumor protein D54	5	NCT	4.369	0.640382	0.003214
Hs 578T	Q15691	MAPRE1	Microtubule-associated protein RP/EB family member 1	6	NCT	4.3048	0.633953	0.0020267
Hs 578T	Q13561	DCTN2	Dynactin subunit 2	3	NCT	4.1189	0.614781	0.0035811
Hs 578T	P35637	FUS	RNA-binding protein FUS	1	NCT	4.1153	0.614402	0.021024
Hs 578T	P20618	PSMB1	Proteasome subunit beta type-1	1	NCT	3.997	0.601734	0.00086929
Hs 578T	P27816	MAP4	Microtubule-associated protein 4	5	NCT	3.9525	0.596872	4.9673e-05
Hs 578T	P0DME0	SETSIP	Protein SETSIP	4	NCT	3.8581	0.586373	0.040385
Hs 578T	P0DP23	CALM1	Calmodulin-1	1	NCT	3.8485	0.585291	0.048453
Hs 578T	P53999	SUB1	Activated RNA polymerase II transcriptional coactivator p15	4	NCT	3.7515	0.574205	0.00014139
Hs 578T	Q9UN67	PCDHB10	Protocadherin beta-10	1	NCT	3.7234	0.57094	0.016741
Hs 578T	O14737	PDCD5	Programmed cell death protein 5	3	NCT	3.6463	0.561852	0.0067318
Hs 578T	P25398	RPS12	40S ribosomal protein S12	5	NCT	3.5799	0.553871	0.012981
Hs 578T	P23246	SFPQ	Splicing factor_ proline- and glutamine-rich	1	NCT	3.5036	0.544515	0.00074088
Hs 578T	P16949	STMN1	Stathmin	6	NCT	3.4747	0.540917	0.0039639
Hs 578T	O00115	DNASE2	Deoxyribonuclease-2-alpha	1	NCT	3.4556	0.538523	0.0021467
Hs 578T	O14950	MYL12B	Myosin regulatory light chain 12B	4	NCT	3.4492	0.537718	0.015027
Hs 578T	O00233	PSMD9	26S proteasome non-ATPase regulatory subunit 9	1	NCT	3.4358	0.536028	0.018977
Hs 578T	P09497	CLTB	Clathrin light chain B	1	NCT	3.4054	0.532168	0.002147
Hs 578T	Q96AE4	FUBP1	Far upstream element-binding protein 1	2	NCT	3.3657	0.527075	1.1098e-05
Hs 578T	Q08043	ACTN3	Alpha-actinin-3	1	NCT	3.357	0.525951	0.013767
Hs 578T	P68371	TUBB4B	Tubulin beta-4B chain	1	NCT	3.3318	0.522679	0.0022815
Hs 578T	Q15942	ZYX	Zyxin	6	NCT	3.3108	0.519933	0.00027394
Hs 578T	P31949	S100A11	Protein S100-A11	4	NCT	3.2432	0.510974	0.0028176
Hs 578T	Q15427	SF3B4	Splicing factor 3B subunit 4	1	NCT	3.2222	0.508152	0.029272
Hs 578T	F8VTS6	RFPL4AL1	Ret finger protein-like 4A-like protein 1	1	NCT	3.1843	0.503014	0.019904
Hs 578T	O75347	TBCA	Tubulin-specific chaperone A	5	NCT	3.1311	0.495697	0.0067428
Hs 578T	P12004	PCNA	Proliferating cell nuclear antigen	4	NCT	3.0821	0.488847	0.011494
Hs 578T	Q92734	TFG	Protein TFG	3	NCT	3.0671	0.486728	0.022726
Hs 578T	P05388	RPLP0	60S acidic ribosomal protein P0	5	NCT	3.0433	0.483345	0.00028519
Hs 578T	P30050	RPL12	60S ribosomal protein L12	5	NCT	3.0244	0.480639	0.033685
Hs 578T	P06703	S100A6	Protein S100-A6	4	NCT	2.9775	0.473852	0.02709
Hs 578T	Q9NQH7	XPNPEP3	Xaa-Pro aminopeptidase 3	1	NCT	2.9772	0.473808	0.0018638
Hs 578T	P42166	TMPO	Lamina-associated polypeptide 2_ isoform alpha	3	NCT	2.9645	0.471951	0.00070782
Hs 578T	P63220	RPS21	40S ribosomal protein S21	1	NCT	2.9642	0.471908	0.02043
Hs 578T	P61978	HNRNPK	Heterogeneous nuclear ribonucleoprotein K	10	NCT	2.9617	0.471541	0.0079057
Hs 578T	P09382	LGALS1	Galectin-1	16	NCT	2.9419	0.468628	0.037554
Hs 578T	Q14247	CTTN	Src substrate cortactin	7	NCT	2.8782	0.459121	0.0261
Hs 578T	P10599	TXN	Thioredoxin	5	NCT	2.7729	0.442934	0.016722
Hs 578T	P10809	HSPD1	60 kDa heat shock protein_ mitochondrial	11	NCT	2.7705	0.442558	0.0020212
Hs 578T	P61960	UFM1	Ubiquitin-fold modifier 1	1	NCT	2.7686	0.44226	0.0014881
Hs 578T	Q15102	PAFAH1B3	Platelet-activating factor acetylhydrolase IB subunit alpha1	2	NCT	2.7212	0.43476	0.0091999
Hs 578T	P63241	EIF5A	Eukaryotic translation initiation factor 5A-1	8	NCT	2.7175	0.43417	0.0014813
Hs 578T	O00151	PDLIM1	PDZ and LIM domain protein 1	2	NCT	2.7076	0.432585	0.010146
Hs 578T	P21291	CSRP1	Cysteine and glycine-rich protein 1	4	NCT	2.7036	0.431942	0.025647
Hs 578T	Q96DU9	PABPC5	Polyadenylate-binding protein 5	1	NCT	2.6967	0.430833	0.029498
Hs 578T	P61158	ACTR3	Actin-related protein 3	8	NCT	2.6943	0.430446	0.015113
Hs 578T	P68104	EEF1A1	Elongation factor 1-alpha 1	10	NCT	2.6726	0.426934	0.020915
Hs 578T	E9PAV3	NACA	Nascent polypeptide-associated complex subunit alpha_ muscle-specific form	5	NCT	2.6568	0.424359	0.0033115
Hs 578T	P31153	MAT2A	S-adenosylmethionine synthase isoform type-2	1	NCT	2.6282	0.419658	0.0056652
Hs 578T	P62979	RPS27A	Ubiquitin-40S ribosomal protein S27a	9	NCT	2.6086	0.416407	0.047298
Hs 578T	Q15404	RSU1	Ras suppressor protein 1	4	NCT	2.5792	0.411485	0.0027338
Hs 578T	P04083	ANXA1	Annexin A1	18	NCT	2.5621	0.408596	0.0060048
Hs 578T	Q9HC38	GLOD4	Glyoxalase domain-containing protein 4	2	NCT	2.558	0.407901	0.00013576
Hs 578T	P15531	NME1	Nucleoside diphosphate kinase A	1	NCT	2.5528	0.407017	0.0058817
Hs 578T	P34932	HSPA4	Heat shock 70 kDa protein 4	8	NCT	2.5338	0.403772	0.022696
Hs 578T	O75822	EIF3J	Eukaryotic translation initiation factor 3 subunit J	3	NCT	2.4988	0.397731	0.00049863
Hs 578T	P62314	SNRPD1	Small nuclear ribonucleoprotein Sm D1	1	NCT	2.4152	0.382953	0.032771
Hs 578T	Q92598	HSPH1	Heat shock protein 105 kDa	10	NCT	2.3883	0.378089	0.005329
Hs 578T	P61088	UBE2N	Ubiquitin-conjugating enzyme E2 N	3	NCT	2.38	0.376577	0.0024737
Hs 578T	P30626	SRI	Sorcin	3	NCT	2.3581	0.372562	0.0215
Hs 578T	Q9H910	JPT2	Jupiter microtubule associated homolog 2	1	NCT	2.3533	0.371677	0.0020384
Hs 578T	P40227	CCT6A	T-complex protein 1 subunit zeta	3	NCT	2.3148	0.364513	0.024351
Hs 578T	P60660	MYL6	Myosin light polypeptide 6	4	NCT	2.3138	0.364326	0.014433
Hs 578T	P52565	ARHGDIA	Rho GDP-dissociation inhibitor 1	3	NCT	2.3088	0.363386	0.030808
Hs 578T	P61604	HSPE1	10 kDa heat shock protein_ mitochondrial	9	NCT	2.3075	0.363142	0.0050152
Hs 578T	Q9UQ80	PA2G4	Proliferation-associated protein 2G4	3	NCT	2.2939	0.360574	0.0074628
Hs 578T	O43396	TXNL1	Thioredoxin-like protein 1	3	NCT	2.2687	0.355777	0.00422
Hs 578T	Q86V81	ALYREF	THO complex subunit 4	3	NCT	2.2469	0.351584	0.036266
Hs 578T	P04080	CSTB	Cystatin-B	4	NCT	2.1933	0.341098	0.026861
Hs 578T	Q96E39	RBMXL1	RNA binding motif protein_ X-linked-like-1	1	NCT	2.1922	0.34088	0.0017843
Hs 578T	P08134	RHOC	Rho-related GTP-binding protein RhoC	1	NCT	2.1775	0.337958	0.01503
Hs 578T	Q01546	KRT76	Keratin_ type II cytoskeletal 2 oral	1	NCT	2.1452	0.331468	0.0037344
Hs 578T	P26641	EEF1G	Elongation factor 1-gamma	6	NCT	2.1251	0.327379	0.004323
Hs 578T	P49720	PSMB3	Proteasome subunit beta type-3	1	NCT	2.0973	0.321661	0.0054418
Hs 578T	O60664	PLIN3	Perilipin-3	10	NCT	2.0274	0.306939	0.036772
Hs 578T	Q9H299	SH3BGRL3	SH3 domain-binding glutamic acid-rich-like protein 3	2	NCT	1.9818	0.29706	0.03735
Hs 578T	P07355	ANXA2	Annexin A2	12	NCT	1.9705	0.294576	0.03626
Hs 578T	O75526	RBMXL2	RNA-binding motif protein_ X-linked-like-2	2	NCT	1.9359	0.286883	0.040437
Hs 578T	P22626	HNRNPA2B1	Heterogeneous nuclear ribonucleoproteins A2/B1	11	NCT	1.922	0.283753	0.023688
Hs 578T	P27348	YWHAQ	14-3-3 protein theta	5	NCT	1.9139	0.281919	0.025274
Hs 578T	P06748	NPM1	Nucleophosmin	4	NCT	1.9122	0.281533	0.0064061
Hs 578T	Q8WXX5	DNAJC9	DnaJ homolog subfamily C member 9	1	NCT	1.9019	0.279188	0.0095686
Hs 578T	Q9Y266	NUDC	Nuclear migration protein nudC	3	NCT	1.8844	0.275173	0.017271
Hs 578T	O43765	SGTA	Small glutamine-rich tetratricopeptide repeat-containing protein alpha	4	NCT	1.8783	0.273765	0.017586
Hs 578T	P62906	RPL10A	60S ribosomal protein L10a	3	NCT	1.8757	0.273163	0.030582
Hs 578T	Q13642	FHL1	Four and a half LIM domains protein 1	1	NCT	1.8746	0.272909	0.0014347
Hs 578T	P54652	HSPA2	Heat shock-related 70 kDa protein 2	5	NCT	1.8237	0.260953	0.035533
Hs 578T	P07900	HSP90AA1	Heat shock protein HSP 90-alpha	12	NCT	1.8196	0.259976	0.011409
Hs 578T	P56537	EIF6	Eukaryotic translation initiation factor 6	4	NCT	1.8072	0.257006	0.041024
Hs 578T	Q96FW1	OTUB1	Ubiquitin thioesterase OTUB1	2	NCT	1.7801	0.250444	0.031798
Hs 578T	P11940	PABPC1	Polyadenylate-binding protein 1	6	NCT	1.7722	0.248513	0.011707
Hs 578T	P30041	PRDX6	Peroxiredoxin-6	12	NCT	1.7676	0.247384	0.046998
Hs 578T	P31946	YWHAB	14-3-3 protein beta/alpha	11	NCT	1.7603	0.245587	0.023448
Hs 578T	Q9Y281	CFL2	Cofilin-2	2	NCT	1.7366	0.2397	0.049172
Hs 578T	P12956	XRCC6	X-ray repair cross-complementing protein 6	4	NCT	1.7338	0.238999	0.026951
Hs 578T	P0DMV8	HSPA1A	Heat shock 70 kDa protein 1A	16	NCT	1.6974	0.229784	0.029042
Hs 578T	P04792	HSPB1	Heat shock protein beta-1	2	NCT	1.6543	0.218614	0.020634
Hs 578T	O00299	CLIC1	Chloride intracellular channel protein 1	13	NCT	1.6414	0.215214	0.01341
Hs 578T	P30153	PPP2R1A	Serine/threonine-protein phosphatase 2A 65 kDa regulatory subunit A alpha isoform	7	NCT	1.6184	0.209086	0.017844
Hs 578T	Q01518	CAP1	Adenylyl cyclase-associated protein 1	10	NCT	1.6076	0.206178	0.013755
Hs 578T	O95336	PGLS	6-phosphogluconolactonase	4	NCT	1.6001	0.204147	0.046229
Hs 578T	P18669	PGAM1	Phosphoglycerate mutase 1	7	NCT	1.5998	0.204066	0.028249
Hs 578T	P16152	CBR1	Carbonyl reductase [NADPH] 1	4	NCT	1.4857	0.171931	0.014556
Hs 578T	Q9BRA2	TXNDC17	Thioredoxin domain-containing protein 17	2	NCT	1.4849	0.171697	0.017341
Hs 578T	P35609	ACTN2	Alpha-actinin-2	1	NCT	1.4781	0.169704	0.030818
Hs 578T	Q02809	PLOD1	Procollagen-lysine_2-oxoglutarate 5-dioxygenase 1	4	NCT	1.4774	0.169498	0.025968
Hs 578T	P60174	TPI1	Triosephosphate isomerase	14	NCT	1.4372	0.157517	0.033964
Hs 578T	P37235	HPCAL1	Hippocalcin-like protein 1	3	NCT	1.4049	0.147645	0.01122
Hs 578T	Q04917	YWHAH	14-3-3 protein eta	2	CTR	0.71916	-0.143174	0.0092995
Hs 578T	Q9ULV4	CORO1C	Coronin-1C	4	CTR	0.64638	-0.189512	0.014008
Hs 578T	O75083	WDR1	WD repeat-containing protein 1	9	CTR	0.60952	-0.215012	0.025547
Hs 578T	Q10471	GALNT2	Polypeptide N-acetylgalactosaminyltransferase 2	7	CTR	0.47312	-0.325029	0.017455
Hs 578T	P55209	NAP1L1	Nucleosome assembly protein 1-like 1	3	CTR	0.44325	-0.353351	0.040563
Hs 578T	P04406	GAPDH	Glyceraldehyde-3-phosphate dehydrogenase	7	CTR	0.41895	-0.377838	0.030494
Hs 578T	P32004	L1CAM	Neural cell adhesion molecule L1	12	CTR	0.41713	-0.379729	0.015989
Hs 578T	P41219	PRPH	Peripherin	3	CTR	0.40639	-0.391057	0.0073464
Hs 578T	Q8NBJ4	GOLM1	Golgi membrane protein 1	1	CTR	0.39227	-0.406415	0.01083
Hs 578T	P08758	ANXA5	Annexin A5	8	CTR	0.3905	-0.408379	0.018572
Hs 578T	P07711	CTSL	Procathepsin L	1	CTR	0.38895	-0.410106	0.016483
Hs 578T	P35527	KRT9	Keratin_ type I cytoskeletal 9	16	CTR	0.33361	-0.476761	0.044545
Hs 578T	P12110	COL6A2	Collagen alpha-2(VI) chain	11	CTR	0.33103	-0.480133	0.031913
Hs 578T	P07339	CTSD	Cathepsin D	10	CTR	0.32343	-0.49022	0.011081
Hs 578T	Q15582	TGFBI	Transforming growth factor-beta-induced protein ig-h3	12	CTR	0.31553	-0.500959	0.00070248
Hs 578T	P20908	COL5A1	Collagen alpha-1(V) chain	12	CTR	0.308	-0.511449	0.0011959
Hs 578T	P01889	HLA-B	HLA class I histocompatibility antigen_ B alpha chain	2	CTR	0.29433	-0.531165	0.00056782
Hs 578T	P05121	SERPINE1	Plasminogen activator inhibitor 1	5	CTR	0.28981	-0.537887	0.014645
Hs 578T	P17066	HSPA6	Heat shock 70 kDa protein 6	1	CTR	0.27224	-0.565048	0.0085922
Hs 578T	P80303	NUCB2	Nucleobindin-2	2	CTR	0.26742	-0.572806	0.0056707
Hs 578T	O43505	B4GAT1	Beta-1_4-glucuronyltransferase 1	1	CTR	0.26174	-0.58213	0.018993
Hs 578T	Q16270	IGFBP7	Insulin-like growth factor-binding protein 7	15	CTR	0.25184	-0.598875	0.014314
Hs 578T	P52823	STC1	Stanniocalcin-1	2	CTR	0.22992	-0.638423	0.0074997
Hs 578T	Q12805	EFEMP1	EGF-containing fibulin-like extracellular matrix protein 1	9	CTR	0.21484	-0.667885	0.0011023
Hs 578T	P02461	COL3A1	Collagen alpha-1(III) chain	20	CTR	0.21198	-0.673705	0.0055352
Hs 578T	P02452	COL1A1	Collagen alpha-1(I) chain	44	CTR	0.20885	-0.680166	0.0066552
Hs 578T	P07942	LAMB1	Laminin subunit beta-1	4	CTR	0.20764	-0.682689	0.013831
Hs 578T	P08572	COL4A2	Collagen alpha-2(IV) chain	14	CTR	0.20485	-0.688564	0.025496
Hs 578T	Q12841	FSTL1	Follistatin-related protein 1	8	CTR	0.20327	-0.691927	0.0096402
Hs 578T	P07585	DCN	Decorin	5	CTR	0.1855	-0.731656	0.0047895
Hs 578T	P09486	SPARC	SPARC	27	CTR	0.18484	-0.733204	0.0033477
Hs 578T	P61812	TGFB2	Transforming growth factor beta-2 proprotein	3	CTR	0.16494	-0.782674	0.0014165
Hs 578T	P07996	THBS1	Thrombospondin-1	26	CTR	0.15672	-0.804876	0.0011734
Hs 578T	O43390	HNRNPR	Heterogeneous nuclear ribonucleoprotein R	1	CTR	0.1502	-0.82333	0.014894
Hs 578T	O14786	NRP1	Neuropilin-1	9	CTR	0.14369	-0.842573	0.00032977
Hs 578T	O94985	CLSTN1	Calsyntenin-1	18	CTR	0.13522	-0.868959	0.0023223
Hs 578T	Q8NAU1	FNDC5	Fibronectin type III domain-containing protein 5	1	CTR	0.13159	-0.880777	7.3726e-05
Hs 578T	P47755	CAPZA2	F-actin-capping protein subunit alpha-2	2	CTR	0.12892	-0.88968	0.023135
Hs 578T	P35237	SERPINB6	Serpin B6	2	CTR	0.12686	-0.896675	0.00084444
Hs 578T	P05067	APP	Amyloid-beta precursor protein	8	CTR	0.12583	-0.900216	0.00073546
Hs 578T	P01034	CST3	Cystatin-C	3	CTR	0.12453	-0.904726	0.001976
Hs 578T	P48061	CXCL12	Stromal cell-derived factor 1	1	CTR	0.11705	-0.931629	0.0031847
Hs 578T	P01033	TIMP1	Metalloproteinase inhibitor 1	10	CTR	0.11631	-0.934383	0.00015258
Hs 578T	Q9UBP4	DKK3	Dickkopf-related protein 3	8	CTR	0.1124	-0.949234	0.00010326
Hs 578T	P14550	AKR1A1	Aldo-keto reductase family 1 member A1	1	CTR	0.10737	-0.969117	0.00080043
Hs 578T	Q2M2I5	KRT24	Keratin_ type I cytoskeletal 24	4	CTR	0.103	-0.987163	0.016116
Hs 578T	P16035	TIMP2	Metalloproteinase inhibitor 2	6	CTR	0.1012	-0.994819	0.0045096
Hs 578T	P05997	COL5A2	Collagen alpha-2(V) chain	30	CTR	0.098138	-1.00816	0.001783
Hs 578T	P35442	THBS2	Thrombospondin-2	2	CTR	0.097048	-1.01301	0.0043453
Hs 578T	P11047	LAMC1	Laminin subunit gamma-1	13	CTR	0.095468	-1.02014	0.00065887
Hs 578T	P04439	HLA-A	HLA class I histocompatibility antigen_ A alpha chain	4	CTR	0.091392	-1.03909	0.002066
Hs 578T	Q9Y4K0	LOXL2	Lysyl oxidase homolog 2	10	CTR	0.088832	-1.05143	0.00040515
Hs 578T	P61769	B2M	Beta-2-microglobulin	6	CTR	0.083752	-1.077	0.00058689
Hs 578T	P12109	COL6A1	Collagen alpha-1(VI) chain	18	CTR	0.082357	-1.0843	0.0021433
Hs 578T	P08123	COL1A2	Collagen alpha-2(I) chain	76	CTR	0.081301	-1.0899	0.0014832
Hs 578T	Q15063	POSTN	Periostin	37	CTR	0.080594	-1.0937	1.9825e-05
Hs 578T	P08253	MMP2	72 kDa type IV collagenase	22	CTR	0.074172	-1.12976	0.0015898
Hs 578T	P13647	KRT5	Keratin_ type II cytoskeletal 5	4	CTR	0.066986	-1.17402	0.017717
Hs 578T	P51884	LUM	Lumican	17	CTR	0.065799	-1.18178	0.0013615
Hs 578T	P55001	MFAP2	Microfibrillar-associated protein 2	2	CTR	0.06414	-1.19287	4.6977e-06
Hs 578T	Q16610	ECM1	Extracellular matrix protein 1	7	CTR	0.063846	-1.19487	9.1745e-06
Hs 578T	O00391	QSOX1	Sulfhydryl oxidase 1	19	CTR	0.063555	-1.19685	0.00023576
Hs 578T	Q14118	DAG1	Dystroglycan 1	6	CTR	0.062868	-1.20157	0.00020442
Hs 578T	Q08380	LGALS3BP	Galectin-3-binding protein	19	CTR	0.061343	-1.21223	4.5694e-05
Hs 578T	P00736	C1R	Complement C1r subcomponent	8	CTR	0.05972	-1.22388	0.00013128
Hs 578T	O95965	ITGBL1	Integrin beta-like protein 1	4	CTR	0.057282	-1.24198	0.0013098
Hs 578T	Q15323	KRT31	Keratin_ type I cuticular Ha1	1	CTR	0.043638	-1.36014	0.00089543
Hs 578T	Q15113	PCOLCE	Procollagen C-endopeptidase enhancer 1	8	CTR	0.038231	-1.41758	0.0089961
Hs 578T	P50454	SERPINH1	Serpin H1	2	CTR	0.036232	-1.44091	0.0041797
Hs 578T	Q14790	CASP8	Caspase-8	3	CTR	0.024111	-1.61778	0.0045255
Hs 578T	P15291	B4GALT1	Beta-1_4-galactosyltransferase 1	3	CTR	0.022509	-1.64764	0.0049514
Hs 578T	Q6EMK4	VASN	Vasorin	1	CTR	0.014458	-1.83989	0.015446
MDA-MB-468	P80188	LCN2	Neutrophil gelatinase-associated lipocalin	10	NCT	1.4098	0.149158	0.00016699
MDA-MB-468	P0CG38	POTEI	POTE ankyrin domain family member I	5	NCT	1.3686	0.136277	0.00026973
MDA-MB-468	P10909	CLU	Clusterin	7	NCT	1.3044	0.115411	0.001398
MDA-MB-468	P49788	RARRES1	Retinoic acid receptor responder protein 1	12	NCT	1.5568	0.192233	0.0052304
MDA-MB-468	P40925	MDH1	Malate dehydrogenase_ cytoplasmic	10	NCT	1.3243	0.121986	0.0062256
MDA-MB-468	Q04695	KRT17	Keratin_ type I cytoskeletal 17	7	NCT	1.7868	0.252076	0.0068639
MDA-MB-468	P11021	HSPA5	Endoplasmic reticulum chaperone BiP	5	NCT	1.3992	0.14588	0.032419
MDA-MB-468	Q5TEC6	H3-2	Histone HIST2H3PS2	3	NCT	1.4367	0.157366	0.046969
MDA-MB-468	P61916	NPC2	NPC intracellular cholesterol transporter 2	2	CTR	0.77064	-0.113148	0.00034155
MDA-MB-468	P14174	MIF	Macrophage migration inhibitory factor	2	CTR	0.56599	-0.247191	0.00090556
MDA-MB-468	Q8NBP7	PCSK9	Proprotein convertase subtilisin/kexin type 9	15	CTR	0.63838	-0.194921	0.0017062
MDA-MB-468	P13928	ANXA8	Annexin A8	4	CTR	0.82704	-0.0824735	0.0061475
MDA-MB-468	O14745	SLC9A3R1	Na(+)/H(+) exchange regulatory cofactor NHE-RF1	1	CTR	0.80982	-0.0916115	0.0095075
MDA-MB-468	P69905	HBA1	Hemoglobin subunit alpha	3	CTR	0.71265	-0.147124	0.011152
MDA-MB-468	P08493	MGP	Matrix Gla protein	2	CTR	0.55014	-0.259527	0.012965
MDA-MB-468	P19957	PI3	Elafin	2	CTR	0.61319	-0.212405	0.014557
MDA-MB-468	P05386	RPLP1	60S acidic ribosomal protein P1	2	CTR	0.68337	-0.165344	0.016028
MDA-MB-468	P21291	CSRP1	Cysteine and glycine-rich protein 1	1	CTR	0.75883	-0.119856	0.016161
MDA-MB-468	P68363	TUBA1B	Tubulin alpha-1B chain	9	CTR	0.73964	-0.13098	0.018963
MDA-MB-468	P12004	PCNA	Proliferating cell nuclear antigen	3	CTR	0.80208	-0.0957823	0.022959
MDA-MB-468	P24534	EEF1B2	Elongation factor 1-beta	4	CTR	0.82445	-0.0838357	0.023204
MDA-MB-468	Q08380	LGALS3BP	Galectin-3-binding protein	18	CTR	0.74754	-0.126366	0.029264
MDA-MB-468	P31431	SDC4	Syndecan-4	3	CTR	0.6811	-0.166789	0.030583
MDA-MB-468	Q14240	EIF4A2	Eukaryotic initiation factor 4A-II	3	CTR	0.76731	-0.115029	0.036991
MDA-MB-468	P0DME0	SETSIP	Protein SETSIP	3	CTR	0.83062	-0.0805976	0.037895
MDA-MB-468	Q12907	LMAN2	Vesicular integral-membrane protein VIP36	2	CTR	0.52801	-0.277358	0.040159
MDA-MB-468	P23142	FBLN1	Fibulin-1	12	CTR	0.74594	-0.127296	0.042439
MDA-MB-468	Q6PEY2	TUBA3E	Tubulin alpha-3E chain	1	CTR	0.69069	-0.160717	0.045207
MDA-MB-468	P17936	IGFBP3	Insulin-like growth factor-binding protein 3	1	CTR	0.65119	-0.186292	0.047146
MDA-MB-231	Q16270	IGFBP7	Insulin-like growth factor-binding protein 7	8	CTR	0.22311	-0.651481	0.0001071
MDA-MB-231	P01033	TIMP1	Metalloproteinase inhibitor 1	8	CTR	0.48834	-0.311278	0.00018065
MDA-MB-231	P22692	IGFBP4	Insulin-like growth factor-binding protein 4	4	CTR	0.23945	-0.620785	0.00052185
MDA-MB-231	P26022	PTX3	Pentraxin-related protein PTX3	3	CTR	0.48804	-0.311545	0.001886
MDA-MB-231	P01037	CST1	Cystatin-SN	5	CTR	0.3998	-0.398157	0.0020473
MDA-MB-231	P14174	MIF	Macrophage migration inhibitory factor	1	CTR	0.42044	-0.376296	0.0025014
MDA-MB-231	P07339	CTSD	Cathepsin D	15	CTR	0.61223	-0.213085	0.0029117
MDA-MB-231	P07996	THBS1	Thrombospondin-1	25	CTR	0.69765	-0.156362	0.0032185
MDA-MB-231	P07602	PSAP	Prosaposin	10	CTR	0.68641	-0.163416	0.0035523
MDA-MB-231	P01034	CST3	Cystatin-C	5	CTR	0.37615	-0.424639	0.005432
MDA-MB-231	P68104	EEF1A1	Elongation factor 1-alpha 1	5	CTR	0.68426	-0.164779	0.0064322
MDA-MB-231	Q8N257	H2BU1	Histone H2B type 3-B	2	CTR	0.38106	-0.419007	0.010894
MDA-MB-231	O60888	CUTA	Protein CutA	1	CTR	0.64248	-0.19214	0.011538
MDA-MB-231	Q08380	LGALS3BP	Galectin-3-binding protein	11	CTR	0.47657	-0.321873	0.014145
MDA-MB-231	P09382	LGALS1	Galectin-1	2	CTR	0.72934	-0.13707	0.016514
MDA-MB-231	P07478	PRSS2	Trypsin-2	3	CTR	0.51279	-0.29006	0.017167
MDA-MB-231	P10909	CLU	Clusterin	5	CTR	0.40566	-0.391838	0.029801
MDA-MB-231	P05121	SERPINE1	Plasminogen activator inhibitor 1	2	CTR	0.64269	-0.191998	0.037626
MDA-MB-231	P62805	H4C1	Histone H4	2	CTR	0.42883	-0.367715	0.041463
MDA-MB-231	P04908	H2AC4	Histone H2A type 1-B/E	2	CTR	0.27573	-0.559516	0.042223
MDA-MB-231	P05452	CLEC3B	Tetranectin	3	NCT	1.3646	0.135005	0.043079

## Sheet: Table S4
Table S4 ClueGO Enrichment analysis results of identified DEPs after NCT-503 treatment
Cell line	Proteome Type	Database	ID	Term	Term PValue	Term PValue Corrected with Benjamini-Hochberg	Group PValue	Group PValue Corrected with Benjamini-Hochberg	GOLevels	GOGroups	% Associated Genes	Nr. Genes	Associated Genes Found
MDA-MB-231	intracellular	GO_BiologicalProcess 25.05.2022	GO:0022900	electron transport chain	0.000101622	0.00180378	1.99536e-05	2.99304e-05	[4]	Group1	3.10881	6	[ALDH4A1, CDK1, COX5B, DLD, ETFB, PHB2]
MDA-MB-231	intracellular	GO_BiologicalProcess 25.05.2022	GO:0009063	cellular amino acid catabolic process	0.000132548	0.00188219	1.99536e-05	2.99304e-05	[4, 5, 6, 7]	Group1	3.93701	5	[ALDH4A1, DLD, ETFB, OAT, SDSL]
MDA-MB-231	intracellular	GO_BiologicalProcess 25.05.2022	GO:2001243	negative regulation of intrinsic apoptotic signaling pathway	7.95678e-05	0.00188311	5.96855e-06	1.79056e-05	[5, 6, 7, 8, 9]	Group2	4.38596	5	[ARHGEF2, DNAJA1, HSPB1, MIF, TIMP1]
MDA-MB-231	intracellular	GO_BiologicalProcess 25.05.2022	GO:0097193	intrinsic apoptotic signaling pathway	2.80017e-05	0.00198812	5.96855e-06	1.79056e-05	[4, 5, 6]	Group2	2.54777	8	[ARHGEF2, DDX5, DNAJA1, EPHA2, HSPB1, MIF, P4HB, TIMP1]
MDA-MB-231	intracellular	GO_BiologicalProcess 25.05.2022	GO:0042026	protein refolding	0.000169728	0.00200845	5.96855e-06	1.79056e-05	[3]	Group2	10.7143	3	[DNAJA1, HSPB1, HSPD1]
MDA-MB-231	intracellular	GO_BiologicalProcess 25.05.2022	GO:0006520	cellular amino acid metabolic process	0.000230225	0.00233513	1.99536e-05	2.99304e-05	[3, 4, 6]	Group1	2.19436	7	[ALDH4A1, DLD, ETFB, GARS1, GMPS, OAT, SDSL]
MDA-MB-231	intracellular	GO_BiologicalProcess 25.05.2022	GO:0034504	protein localization to nucleus	0.000282888	0.00251063	0.000282888	0.000282888	[6]	Group0	2.12121	7	[BAG3, CDK1, KPNA2, PHB2, RANGAP1, SKP1, SQSTM1]
MDA-MB-231	intracellular	GO_BiologicalProcess 25.05.2022	GO:2001242	regulation of intrinsic apoptotic signaling pathway	7.13201e-05	0.00253186	5.96855e-06	1.79056e-05	[5, 6, 7, 8]	Group2	3.31492	6	[ARHGEF2, DNAJA1, HSPB1, MIF, P4HB, TIMP1]
MDA-MB-231	intracellular	GO_MolecularFunction_25.05.2022	GO:0032147	activation of protein kinase activity	0.00148087	0.00296174	0.00148087	0.00148087	[5, 6, 7, 8]	Group0	2.21239	5	[CALM1, ETFB, PHB1, PHB2, TIMP1]
MDA-MB-231	intracellular	KEGG_25.05.2022	KEGG:04218	Cellular senescence	0.000133892	0.00227617	0.000133892	0.000267784	[-1]	Group1	3.84615	6	[CALM1, CALML3, CDK1, EIF4EBP1, PPP3R2, SQSTM1]
MDA-MB-231	intracellular	KEGG_25.05.2022	KEGG:04114	Oocyte meiosis	0.000529066	0.00449706	0.000529066	0.000529066	[-1]	Group0	3.81679	5	[CALM1, CALML3, CDK1, PPP3R2, SKP1]
MDA-MB-231	secretome	REACTOME_Pathways_25.05.2022	R-HSA:76005	Response to elevated platelet cytosolic Ca2+	1.47604e-09	6.6422e-09	1.58228e-07	4.74685e-07	[-1]	Group1	5.22388	7	[CLEC3B, CLU, LGALS3BP, PSAP, SERPINE1, THBS1, TIMP1]
MDA-MB-231	secretome	REACTOME_Pathways_25.05.2022	R-HSA:114608	Platelet degranulation	1.1294e-09	1.01646e-08	1.58228e-07	4.74685e-07	[-1]	Group1	5.42636	7	[CLEC3B, CLU, LGALS3BP, PSAP, SERPINE1, THBS1, TIMP1]
MDA-MB-231	secretome	REACTOME_Pathways_25.05.2022	R-HSA:76002	Platelet activation, signaling and aggregation	1.58228e-07	4.74685e-07	1.58228e-07	4.74685e-07	[-1]	Group1	2.6616	7	[CLEC3B, CLU, LGALS3BP, PSAP, SERPINE1, THBS1, TIMP1]
MDA-MB-231	secretome	REACTOME_Pathways_25.05.2022	R-HSA:8957275	Post-translational protein phosphorylation	8.49548e-07	1.91148e-06	1.75544e-06	1.75544e-06	[-1]	Group0	4.62963	5	[CST3, IGFBP4, IGFBP7, LGALS1, TIMP1]
MDA-MB-231	secretome	REACTOME_Pathways_25.05.2022	R-HSA:381426	Regulation of Insulin-like Growth Factor (IGF) transport and uptake by Insulin-like Growth Factor Binding Proteins (IGFBPs)	1.75544e-06	3.15979e-06	1.75544e-06	1.75544e-06	[-1]	Group0	4	5	[CST3, IGFBP4, IGFBP7, LGALS1, TIMP1]
MDA-MB-231	secretome	REACTOME_Pathways_25.05.2022	R-HSA:8936459	RUNX1 regulates genes involved in megakaryocyte differentiation and platelet function	1.72978e-05	2.59466e-05	9.95708e-07	1.49356e-06	[-1]	Group2	4.25532	4	[H2AC4, H2BU1, H4-16, THBS1]
MDA-MB-231	secretome	REACTOME_Pathways_25.05.2022	R-HSA:2559582	Senescence-Associated Secretory Phenotype (SASP)	3.21809e-05	4.13754e-05	9.95708e-07	1.49356e-06	[-1]	Group2	3.63636	4	[H2AC4, H2BU1, H4-16, IGFBP7]
MDA-MB-231	secretome	REACTOME_Pathways_25.05.2022	R-HSA:977225	Amyloid fiber formation	3.21809e-05	4.13754e-05	9.95708e-07	1.49356e-06	[-1]	Group2	3.63636	4	[CST3, H2AC4, H2BU1, H4-16]
MDA-MB-231	secretome	REACTOME_Pathways_25.05.2022	R-HSA:9018519	Estrogen-dependent gene expression	0.000105342	0.00011851	9.95708e-07	1.49356e-06	[-1]	Group2	2.68456	4	[CTSD, H2AC4, H2BU1, H4-16]
MDA-MB-231	secretome	REACTOME_Pathways_25.05.2022	R-HSA:2559583	Cellular Senescence	0.00029672	0.00029672	9.95708e-07	1.49356e-06	[-1]	Group2	2.05128	4	[H2AC4, H2BU1, H4-16, IGFBP7]
MDA-MB-231	secretome	GO_BiologicalProcess 25.05.2022	GO:0010755	regulation of plasminogen activation	1.08879e-06	1.19767e-05	9.87158e-05	0.000131621	[7, 8, 9]	Group3	16.6667	3	[CLEC3B, SERPINE1, THBS1]
MDA-MB-231	secretome	GO_BiologicalProcess 25.05.2022	GO:0031639	plasminogen activation	4.33865e-06	2.38626e-05	9.87158e-05	0.000131621	[7, 8]	Group3	10.7143	3	[CLEC3B, SERPINE1, THBS1]
MDA-MB-231	secretome	GO_BiologicalProcess 25.05.2022	GO:1903317	regulation of protein maturation	7.96491e-05	0.000146023	9.87158e-05	0.000131621	[5, 6]	Group3	4.10959	3	[CLEC3B, SERPINE1, THBS1]
MDA-MB-231	secretome	GO_BiologicalProcess 25.05.2022	GO:0031638	zymogen activation	7.33029e-05	0.000161266	9.87158e-05	0.000131621	[6, 7]	Group3	4.22535	3	[CLEC3B, SERPINE1, THBS1]
MDA-MB-231	secretome	GO_BiologicalProcess 25.05.2022	GO:0070613	regulation of protein processing	7.0258e-05	0.00019321	9.87158e-05	0.000131621	[6, 7]	Group3	4.28571	3	[CLEC3B, SERPINE1, THBS1]
MDA-MB-231	secretome	GO_BiologicalProcess 25.05.2022	GO:0004866	endopeptidase inhibitor activity	6.65971e-05	0.000244189	6.65971e-05	0.000133194	[7, 8, 9, 10]	Group0	2.06186	4	[CST1, CST3, SERPINE1, TIMP1]
MDA-MB-231	secretome	GO_BiologicalProcess 25.05.2022	GO:2000117	negative regulation of cysteine-type endopeptidase activity	0.00022787	0.000358082	0.00022787	0.00022787	[8, 9, 10]	Group1	2.88462	3	[CST1, CST3, THBS1]
MDA-MB-231	secretome	GO_BiologicalProcess 25.05.2022	GO:1903557	positive regulation of tumor necrosis factor superfamily cytokine production	0.000322363	0.000393999	1.88868e-05	7.55471e-05	[4, 5, 6, 7, 8]	Group2	2.5641	3	[CLU, MIF, THBS1]
MDA-MB-231	secretome	GO_BiologicalProcess 25.05.2022	GO:1903557	positive regulation of tumor necrosis factor superfamily cytokine production	0.000322363	0.000393999	9.87158e-05	0.000131621	[4, 5, 6, 7, 8]	Group3	2.5641	3	[CLU, MIF, THBS1]
MDA-MB-231	secretome	GO_BiologicalProcess 25.05.2022	GO:0042116	macrophage activation	0.00029866	0.000410658	1.88868e-05	7.55471e-05	[4, 5]	Group2	2.63158	3	[CLU, MIF, THBS1]
MDA-MB-231	secretome	GO_BiologicalProcess 25.05.2022	GO:0032760	positive regulation of tumor necrosis factor production	0.00029866	0.000410658	1.88868e-05	7.55471e-05	[5, 6, 7, 8, 9]	Group2	2.63158	3	[CLU, MIF, THBS1]
MDA-MB-231	secretome	GO_BiologicalProcess 25.05.2022	GO:2001243	negative regulation of intrinsic apoptotic signaling pathway	0.00029866	0.000410658	1.88868e-05	7.55471e-05	[5, 6, 7, 8, 9]	Group2	2.63158	3	[CLU, MIF, TIMP1]
MDA-MB-231	secretome	GO_BiologicalProcess 25.05.2022	GO:0042116	macrophage activation	0.00029866	0.000410658	9.87158e-05	0.000131621	[4, 5]	Group3	2.63158	3	[CLU, MIF, THBS1]
MDA-MB-231	secretome	GO_BiologicalProcess 25.05.2022	GO:0032760	positive regulation of tumor necrosis factor production	0.00029866	0.000410658	9.87158e-05	0.000131621	[5, 6, 7, 8, 9]	Group3	2.63158	3	[CLU, MIF, THBS1]
MDA-MB-231	secretome	GO_BiologicalProcess 25.05.2022	GO:0009408	response to heat	0.000400672	0.000440739	1.88868e-05	7.55471e-05	[3, 4]	Group2	2.38095	3	[CLU, IGFBP7, THBS1]
MDA-MB-231	secretome	GO_BiologicalProcess 25.05.2022	GO:0002688	regulation of leukocyte chemotaxis	0.000556656	0.000556656	1.88868e-05	7.55471e-05	[4, 5, 6, 7]	Group2	2.12766	3	[MIF, SERPINE1, THBS1]
MDA-MB-231	secretome	GO_BiologicalProcess 25.05.2022	GO:0002688	regulation of leukocyte chemotaxis	0.000556656	0.000556656	9.87158e-05	0.000131621	[4, 5, 6, 7]	Group3	2.12766	3	[MIF, SERPINE1, THBS1]
MDA-MB-468	intracellular	REACTOME_Pathways_25.05.2022	R-HSA:68886	M Phase	0.00015213	0.00466532	0.00015213	0.00030426	[-1]	Group0	3.125	13	[BUB3, CDK1, CSNK2A1, CSNK2A2, DYNC1I2, ENSA, HAUS4, KPNB1, NUP85, PPP2R2A, PSMA8, TUBAL3, USO1]
MDA-MB-468	intracellular	REACTOME_Pathways_25.05.2022	R-HSA:70263	Gluconeogenesis	0.000321993	0.00493723	0.000321993	0.000321993	[-1]	Group1	11.4286	4	[ALDOB, ALDOC, PCK2, SLC25A1]
MDA-MB-468	intracellular	KEGG_25.05.2022	KEGG:00010	Glycolysis / Gluconeogenesis	2.26569e-07	7.02362e-06	2.26569e-07	6.79706e-07	[-1]	Group0	11.9403	8	[ALDH1B1, ALDOB, ALDOC, LDHAL6A, LDHAL6B, PCK2, PGM2, PKLR]
MDA-MB-468	intracellular	KEGG_25.05.2022	KEGG:00620	Pyruvate metabolism	5.41318e-06	8.39042e-05	5.41318e-06	8.11976e-06	[-1]	Group2	12.766	6	[ALDH1B1, GRHPR, LDHAL6A, LDHAL6B, PCK2, PKLR]
MDA-MB-468	intracellular	KEGG_25.05.2022	KEGG:00030	Pentose phosphate pathway	0.000186353	0.00192565	0.000186353	0.000186353	[-1]	Group1	13.3333	4	[ALDOB, ALDOC, PGM2, PRPS1]
MDA-MB-468	secreted	REACTOME_Pathways_25.05.2022	R-HSA:76005	Response to elevated platelet cytosolic Ca2+	0.0022719	0.0030292	0.0022719	0.00340785	[-1]	Group2	2.23881	3	[CLU, HSPA5, LGALS3BP]
MDA-MB-468	secreted	REACTOME_Pathways_25.05.2022	R-HSA:1169410	Antiviral mechanism by IFN-stimulated genes	0.00307065	0.00307065	0.00307065	0.00307065	[-1]	Group0	2.01342	3	[EIF4A2, TUBA1B, TUBA3E]
MDA-MB-468	secreted	REACTOME_Pathways_25.05.2022	R-HSA:6803157	Antimicrobial peptides	0.00084339	0.00337356	0.00084339	0.00253017	[-1]	Group1	3.15789	3	[CLU, LCN2, PI3]
MDA-MB-468	secreted	REACTOME_Pathways_25.05.2022	R-HSA:114608	Platelet degranulation	0.00203827	0.00407653	0.0022719	0.00340785	[-1]	Group2	2.32558	3	[CLU, HSPA5, LGALS3BP]
MDA-MB-468	secreted	GO_BiologicalProcess 25.05.2022	GO:0030301	cholesterol transport	0.000694364	0.000694364	0.000694364	0.000694364	[6, 7]	Group0	2.65487	3	[CLU, NPC2, PCSK9]
MDA-MB-468	secreted	GO_MolecularFunction_25.05.2022	GO:0050750	low-density lipoprotein particle receptor binding	1.00097e-05	1.00097e-05	1.00097e-05	1.00097e-05	[5]	Group0	11.1111	3	[CLU, CSRP1, PCSK9]
MDA-MB-468	secreted	KEGG_25.05.2022	KEGG:04530	Tight junction	0.000346269	0.000346269	0.000346269	0.000346269	[-1]	Group0	2.36686	4	[PCNA, SLC9A3R1, TUBA1B, TUBA3E]
MDA-MB-468	secreted	WikiPathways_23.02.2022	WP:2359	Parkin-ubiquitin proteasomal system pathway	0.000608966	0.000608966	0.000608966	0.000608966	[-1]	Group0	4.28571	3	[HSPA5, TUBA1B, TUBA3E]
Hs 578T	intracellular	REACTOME_Pathways_25.05.2022	R-HSA:1474290	Collagen formation	0.00218791	0.00328187	0.00218791	0.00218791	[-1]	Group0	3.33333	3	[COL1A2, COL3A1, PLOD2]
Hs 578T	intracellular	REACTOME_Pathways_25.05.2022	R-HSA:1650814	Collagen biosynthesis and modifying enzymes	0.000933362	0.00280009	0.00218791	0.00218791	[-1]	Group0	4.47761	3	[COL1A2, COL3A1, PLOD2]
Hs 578T	intracellular	GO_BiologicalProcess 25.05.2022	GO:0043462	regulation of ATP-dependent activity	1.80955e-05	1.80955e-05	1.80955e-05	1.80955e-05	[3]	Group0	5.33333	4	[CHTOP, DHX9, TPM1, TPM2]
Hs 578T	intracellular	GO_MolecularFunction_25.05.2022	GO:0004386	helicase activity	0.000382022	0.000382022	0.000382022	0.000382022	[2, 3]	Group0	2.25989	4	[CHTOP, DDX3Y, DDX5, DHX9]
Hs 578T	secretome	REACTOME_Pathways_25.05.2022	R-HSA:1474244	Extracellular matrix organization	6.18807e-16	1.974e-13	2.28123e-07	6.84369e-07	[-1]	Group18	9.66667	29	[APP, COL1A1, COL1A2, COL3A1, COL4A2, COL5A1, COL5A2, COL6A1, COL6A2, CTSD, CTSL, DAG1, DCN, EFEMP1, LAMB1, LAMC1, LOXL2, LUM, MFAP2, MMP2, PCOLCE, PLOD1, SERPINE1, SERPINH1, SPARC, TGFB2, THBS1, TIMP1, TIMP2]
Hs 578T	secretome	REACTOME_Pathways_25.05.2022	R-HSA:75205	Dissolution of Fibrin Clot	0.000838901	0.00212388	0.000838901	0.000880846	[-1]	Group01	23.0769	3	[ANXA2, SERPINB6, SERPINE1]
Hs 578T	secretome	REACTOME_Pathways_25.05.2022	R-HSA:392499	Metabolism of proteins	9.52666e-08	1.68834e-06	9.52666e-08	3.33433e-07	[-1]	Group02	2.88878	60	[APP, B2M, B4GALT1, B4GAT1, CALM1, CAPZA2, CCT6A, CST3, CTSD, DAG1, DCTN2, EEF1A1, EEF1B2, EEF1D, EEF1G, EIF3J, EIF5A, FSTL1, GALNT2, GOLM1, HLA-A, HNRNPK, HSPD1, IGFBP7, LAMB1, LAMC1, LGALS1, MMP2, NPM1, OTUB1, PABPC1, PCNA, PFDN4, PSMB1, PSMB3, PSMD9, QSOX1, RAD23B, RPL10A, RPL12, RPLP0, RPLP1, RPLP2, RPS12, RPS21, RPS27A, SRP9, TBCA, TFG, TGFBI, THBS1, THBS2, TIMP1, TUBA1A, TUBA1B, TUBA3C, TUB…
Hs 578T	secretome	REACTOME_Pathways_25.05.2022	R-HSA:597592	Post-translational protein modification	0.000469765	0.00126996	9.52666e-08	3.33433e-07	[-1]	Group02	2.59918	38	[APP, B4GALT1, B4GAT1, CALM1, CAPZA2, CST3, DAG1, DCTN2, EEF1A1, EIF5A, FSTL1, GALNT2, GOLM1, HLA-A, HNRNPK, IGFBP7, LAMB1, LAMC1, LGALS1, NPM1, OTUB1, PCNA, PSMB1, PSMB3, PSMD9, QSOX1, RAD23B, RPS27A, TFG, THBS1, THBS2, TIMP1, TUBA1A, TUBA1B, TUBA3C, TUBA3E, TUBB4B, UBE2N]
Hs 578T	secretome	REACTOME_Pathways_25.05.2022	R-HSA:381426	Regulation of Insulin-like Growth Factor (IGF) transport and uptake by Insulin-like Growth Factor Binding Proteins (IGFBPs)	2.53103e-06	1.96926e-05	2.53103e-06	4.4293e-06	[-1]	Group03	8.8	11	[APP, CST3, FSTL1, GOLM1, IGFBP7, LAMB1, LAMC1, LGALS1, MMP2, QSOX1, TIMP1]
Hs 578T	secretome	REACTOME_Pathways_25.05.2022	R-HSA:8957275	Post-translational protein phosphorylation	4.6385e-06	3.08267e-05	2.53103e-06	4.4293e-06	[-1]	Group03	9.25926	10	[APP, CST3, FSTL1, GOLM1, IGFBP7, LAMB1, LAMC1, LGALS1, QSOX1, TIMP1]
Hs 578T	secretome	REACTOME_Pathways_25.05.2022	R-HSA:3371497	HSP90 chaperone cycle for steroid hormone receptors (SHR) in the presence of ligand	6.91258e-09	2.20511e-07	1.15036e-08	6.0394e-08	[-1]	Group04	18.1818	10	[CAPZA2, DCTN2, HSP90AA1, HSPA1A, HSPA2, TUBA1A, TUBA1B, TUBA3C, TUBA3E, TUBB4B]
Hs 578T	secretome	REACTOME_Pathways_25.05.2022	R-HSA:3371556	Cellular response to heat stress	0.000360687	0.00102731	1.15036e-08	6.0394e-08	[-1]	Group04	7.86517	7	[EEF1A1, HSP90AA1, HSPA1A, HSPA2, HSPA4, HSPA6, HSPH1]
Hs 578T	secretome	REACTOME_Pathways_25.05.2022	R-HSA:3371568	Attenuation phase	0.00105602	0.00257153	1.15036e-08	6.0394e-08	[-1]	Group04	21.4286	3	[HSP90AA1, HSPA1A, HSPA2]
Hs 578T	secretome	REACTOME_Pathways_25.05.2022	R-HSA:8953897	Cellular responses to stimuli	3.63042e-06	2.57356e-05	6.96295e-05	9.74813e-05	[-1]	Group15	3.663	30	[CAPZA2, CSRP1, DCTN2, EEF1A1, HSP90AA1, HSPA1A, HSPA2, HSPA4, HSPA6, HSPH1, IGFBP7, MT2A, PRDX6, PSMB1, PSMB3, PSMD9, RPL10A, RPL12, RPLP0, RPLP1, RPLP2, RPS12, RPS21, RPS27A, TUBA1A, TUBA1B, TUBA3C, TUBA3E, TUBB4B, TXN]
Hs 578T	secretome	REACTOME_Pathways_25.05.2022	R-HSA:9716542	Signaling by Rho GTPases, Miro GTPases and RHOBTB3	8.25153e-06	4.61796e-05	0.000191907	0.000251877	[-1]	Group05	3.73961	27	[ACTR3, ARHGDIA, CALM1, CCT6A, CTTN, EFHD2, HSP90AA1, HSPE1, MAPRE1, MYL12B, MYL6, NSFL1C, NUDC, PLIN3, PPP2R1A, RHOC, TMPO, TPM4, TUBA1A, TUBA1B, TUBA3C, TUBA3E, TUBB4B, TXNL1, YWHAB, YWHAH, YWHAQ]
Hs 578T	secretome	REACTOME_Pathways_25.05.2022	R-HSA:194315	Signaling by Rho GTPases	1.62517e-05	7.85497e-05	0.000191907	0.000251877	[-1]	Group05	3.68272	26	[ACTR3, ARHGDIA, CALM1, CCT6A, CTTN, EFHD2, HSP90AA1, HSPE1, MAPRE1, MYL12B, MYL6, NSFL1C, NUDC, PPP2R1A, RHOC, TMPO, TPM4, TUBA1A, TUBA1B, TUBA3C, TUBA3E, TUBB4B, TXNL1, YWHAB, YWHAH, YWHAQ]
Hs 578T	secretome	REACTOME_Pathways_25.05.2022	R-HSA:8953897	Cellular responses to stimuli	3.63042e-06	2.57356e-05	1.27322e-12	2.67376e-11	[-1]	Group16	3.663	30	[CAPZA2, CSRP1, DCTN2, EEF1A1, HSP90AA1, HSPA1A, HSPA2, HSPA4, HSPA6, HSPH1, IGFBP7, MT2A, PRDX6, PSMB1, PSMB3, PSMD9, RPL10A, RPL12, RPLP0, RPLP1, RPLP2, RPS12, RPS21, RPS27A, TUBA1A, TUBA1B, TUBA3C, TUBA3E, TUBB4B, TXN]
Hs 578T	secretome	REACTOME_Pathways_25.05.2022	R-HSA:168643	Nucleotide-binding domain, leucine rich repeat containing receptor (NLR) signaling pathways	0.000196216	0.000619733	0.000290643	0.00035903	[-1]	Group06	10.5263	6	[APP, CASP8, RPS27A, SUGT1, TXN, UBE2N]
Hs 578T	secretome	REACTOME_Pathways_25.05.2022	R-HSA:5607764	CLEC7A (Dectin-1) signaling	0.000775459	0.00197897	0.000290643	0.00035903	[-1]	Group06	6.93069	7	[CALM1, CASP8, PSMB1, PSMB3, PSMD9, RPS27A, UBE2N]
Hs 578T	secretome	REACTOME_Pathways_25.05.2022	R-HSA:844456	The NLRP3 inflammasome	0.00158937	0.00375561	0.000290643	0.00035903	[-1]	Group06	18.75	3	[APP, SUGT1, TXN]
Hs 578T	secretome	REACTOME_Pathways_25.05.2022	R-HSA:9020702	Interleukin-1 signaling	0.00166021	0.00386575	0.000290643	0.00035903	[-1]	Group06	6.08696	7	[APP, CASP8, PSMB1, PSMB3, PSMD9, RPS27A, UBE2N]
Hs 578T	secretome	REACTOME_Pathways_25.05.2022	R-HSA:445355	Smooth Muscle Contraction	4.11759e-06	2.7947e-05	0.000424155	0.000494848	[-1]	Group07	15.5556	7	[ANXA1, ANXA2, CALM1, MYL12B, MYL6, TPM2, TPM4]
Hs 578T	secretome	REACTOME_Pathways_25.05.2022	R-HSA:5627123	RHO GTPases activate PAKs	0.000404216	0.00111159	0.000424155	0.000494848	[-1]	Group07	16.6667	4	[CALM1, CTTN, MYL12B, MYL6]
Hs 578T	secretome	REACTOME_Pathways_25.05.2022	R-HSA:397014	Muscle contraction	0.00100335	0.00246207	0.000424155	0.000494848	[-1]	Group07	4.87805	10	[ACTN2, ACTN3, ANXA1, ANXA2, CALM1, MYL12B, MYL6, SRI, TPM2, TPM4]
Hs 578T	secretome	REACTOME_Pathways_25.05.2022	R-HSA:390522	Striated Muscle Contraction	0.00194948	0.00437947	0.000424155	0.000494848	[-1]	Group07	11.1111	4	[ACTN2, ACTN3, TPM2, TPM4]
Hs 578T	secretome	REACTOME_Pathways_25.05.2022	R-HSA:114608	Platelet degranulation	7.00386e-09	2.03112e-07	4.83624e-07	1.12846e-06	[-1]	Group08	10.8527	14	[ACTN2, ANXA5, APP, CALM1, CAP1, ECM1, LGALS3BP, QSOX1, SERPINE1, SPARC, TGFB2, THBS1, TIMP1, WDR1]
Hs 578T	secretome	REACTOME_Pathways_25.05.2022	R-HSA:76005	Response to elevated platelet cytosolic Ca2+	1.15036e-08	3.05805e-07	4.83624e-07	1.12846e-06	[-1]	Group08	10.4478	14	[ACTN2, ANXA5, APP, CALM1, CAP1, ECM1, LGALS3BP, QSOX1, SERPINE1, SPARC, TGFB2, THBS1, TIMP1, WDR1]
Hs 578T	secretome	REACTOME_Pathways_25.05.2022	R-HSA:109582	Hemostasis	4.83624e-07	5.71393e-06	4.83624e-07	1.12846e-06	[-1]	Group08	4.34084	27	[ACTN2, ANXA2, ANXA5, APP, CALM1, CAP1, CAPZA2, COL1A1, COL1A2, ECM1, L1CAM, LGALS3BP, PPP2R1A, QSOX1, SERPINB6, SERPINE1, SPARC, SRI, TGFB2, THBS1, TIMP1, TUBA1A, TUBA1B, TUBA3C, TUBA3E, TUBB4B, WDR1]
Hs 578T	secretome	REACTOME_Pathways_25.05.2022	R-HSA:76002	Platelet activation, signaling and aggregation	1.93184e-06	1.66556e-05	4.83624e-07	1.12846e-06	[-1]	Group08	6.08365	16	[ACTN2, ANXA5, APP, CALM1, CAP1, COL1A1, COL1A2, ECM1, LGALS3BP, QSOX1, SERPINE1, SPARC, TGFB2, THBS1, TIMP1, WDR1]
Hs 578T	secretome	REACTOME_Pathways_25.05.2022	R-HSA:6798695	Neutrophil degranulation	6.98636e-07	7.18919e-06	6.54328e-06	1.05699e-05	[-1]	Group09	4.79167	23	[ANXA2, B2M, B4GALT1, CAP1, CST3, CSTB, CTSD, EEF1A1, HLA-B, HSP90AA1, HSPA1A, HSPA6, PA2G4, PDAP1, PGAM1, PRDX6, PSMB1, QSOX1, S100A11, SERPINB6, TIMP2, TUBB4B, XRCC6]
Hs 578T	secretome	REACTOME_Pathways_25.05.2022	R-HSA:168249	Innate Immune System	8.52859e-07	8.50193e-06	6.54328e-06	1.05699e-05	[-1]	Group09	3.46442	37	[ACTR3, ANXA2, APP, B2M, B4GALT1, C1R, CALM1, CAP1, CAPZA2, CASP8, CST3, CSTB, CTSD, CTSL, EEF1A1, HLA-B, HSP90AA1, HSPA1A, HSPA6, PA2G4, PDAP1, PGAM1, PPP2R1A, PRDX6, PSMB1, PSMB3, PSMD9, QSOX1, RPS27A, S100A11, SERPINB6, SUGT1, TIMP2, TUBB4B, TXN, UBE2N, XRCC6]
Hs 578T	secretome	REACTOME_Pathways_25.05.2022	R-HSA:8953897	Cellular responses to stimuli	3.63042e-06	2.57356e-05	9.81234e-11	1.0303e-09	[-1]	Group19	3.663	30	[CAPZA2, CSRP1, DCTN2, EEF1A1, HSP90AA1, HSPA1A, HSPA2, HSPA4, HSPA6, HSPH1, IGFBP7, MT2A, PRDX6, PSMB1, PSMB3, PSMD9, RPL10A, RPL12, RPLP0, RPLP1, RPLP2, RPS12, RPS21, RPS27A, TUBA1A, TUBA1B, TUBA3C, TUBA3E, TUBB4B, TXN]
Hs 578T	secretome	REACTOME_Pathways_25.05.2022	R-HSA:1280215	Cytokine Signaling in Immune system	1.85077e-05	8.68228e-05	6.54328e-06	1.05699e-05	[-1]	Group09	3.55781	28	[ANXA1, ANXA2, APP, B2M, CASP8, COL1A2, HLA-A, HLA-B, HNRNPA2B1, HSP90AA1, HSPA1A, HSPA2, MMP2, MT2A, NPM1, PPP2R1A, PSMB1, PSMB3, PSMD9, RPLP0, RPS27A, TIMP1, TUBA1A, TUBA1B, TUBA3C, TUBA3E, TUBB4B, UBE2N]
Hs 578T	secretome	REACTOME_Pathways_25.05.2022	R-HSA:1280218	Adaptive Immune System	0.00161814	0.0037955	6.54328e-06	1.05699e-05	[-1]	Group09	2.99479	23	[B2M, CALM1, CAPZA2, COL1A1, COL1A2, COL3A1, CTSD, CTSL, DCTN2, HLA-A, HLA-B, PPP2R1A, PSMB1, PSMB3, PSMD9, RPS27A, TUBA1A, TUBA1B, TUBA3C, TUBA3E, TUBB4B, UBE2N, YWHAB]
Hs 578T	secretome	REACTOME_Pathways_25.05.2022	R-HSA:9663891	Selective autophagy	3.09781e-06	2.29814e-05	2.18762e-05	3.28144e-05	[-1]	Group10	11.1111	9	[HSP90AA1, PLIN3, RPS27A, TUBA1A, TUBA1B, TUBA3C, TUBA3E, TUBB4B, UBE2N]
Hs 578T	secretome	REACTOME_Pathways_25.05.2022	R-HSA:8953897	Cellular responses to stimuli	3.63042e-06	2.57356e-05	1.61784e-09	1.13249e-08	[-1]	Group20	3.663	30	[CAPZA2, CSRP1, DCTN2, EEF1A1, HSP90AA1, HSPA1A, HSPA2, HSPA4, HSPA6, HSPH1, IGFBP7, MT2A, PRDX6, PSMB1, PSMB3, PSMD9, RPL10A, RPL12, RPLP0, RPLP1, RPLP2, RPS12, RPS21, RPS27A, TUBA1A, TUBA1B, TUBA3C, TUBA3E, TUBB4B, TXN]
Hs 578T	secretome	REACTOME_Pathways_25.05.2022	R-HSA:1632852	Macroautophagy	0.000197402	0.000617365	2.18762e-05	3.28144e-05	[-1]	Group10	6.61765	9	[HSP90AA1, PLIN3, RPS27A, TUBA1A, TUBA1B, TUBA3C, TUBA3E, TUBB4B, UBE2N]
Hs 578T	secretome	REACTOME_Pathways_25.05.2022	R-HSA:9613829	Chaperone Mediated Autophagy	0.00028482	0.000841273	2.18762e-05	3.28144e-05	[-1]	Group10	18.1818	4	[EEF1A1, HSP90AA1, PLIN3, RPS27A]
Hs 578T	secretome	REACTOME_Pathways_25.05.2022	R-HSA:9735869	SARS-CoV-1 modulates host translation machinery	0.00216064	0.00475341	2.18762e-05	3.28144e-05	[-1]	Group10	10.8108	4	[EEF1A1, RPS12, RPS21, RPS27A]
Hs 578T	secretome	REACTOME_Pathways_25.05.2022	R-HSA:1445148	Translocation of SLC2A4 (GLUT4) to the plasma membrane	1.13357e-06	1.09579e-05	9.36706e-07	1.96708e-06	[-1]	Group11	12.5	9	[CALM1, TUBA1A, TUBA1B, TUBA3C, TUBA3E, TUBB4B, YWHAB, YWHAH, YWHAQ]
Hs 578T	secretome	REACTOME_Pathways_25.05.2022	R-HSA:9692914	SARS-CoV-1-host interactions	9.10385e-05	0.000326306	9.36706e-07	1.96708e-06	[-1]	Group11	8.33333	8	[EEF1A1, NPM1, RPS12, RPS21, RPS27A, YWHAB, YWHAH, YWHAQ]
Hs 578T	secretome	REACTOME_Pathways_25.05.2022	R-HSA:9678108	SARS-CoV-1 Infection	0.000272958	0.000821448	9.36706e-07	1.96708e-06	[-1]	Group11	6.33803	9	[CTSL, EEF1A1, NPM1, RPS12, RPS21, RPS27A, YWHAB, YWHAH, YWHAQ]
Hs 578T	secretome	REACTOME_Pathways_25.05.2022	R-HSA:9755779	SARS-CoV-2 targets host intracellular signalling and regulatory pathways	0.000652444	0.00170598	9.36706e-07	1.96708e-06	[-1]	Group11	25	3	[YWHAB, YWHAH, YWHAQ]
Hs 578T	secretome	REACTOME_Pathways_25.05.2022	R-HSA:75035	Chk1/Chk2(Cds1) mediated inactivation of Cyclin B:Cdk1 complex	0.000838901	0.00212388	9.36706e-07	1.96708e-06	[-1]	Group11	23.0769	3	[YWHAB, YWHAH, YWHAQ]
Hs 578T	secretome	REACTOME_Pathways_25.05.2022	R-HSA:111447	Activation of BAD and translocation to mitochondria	0.00130561	0.00315522	9.36706e-07	1.96708e-06	[-1]	Group11	20	3	[YWHAB, YWHAH, YWHAQ]
Hs 578T	secretome	REACTOME_Pathways_25.05.2022	R-HSA:9735871	SARS-CoV-1 targets host intracellular signalling and regulatory pathways	0.00130561	0.00315522	9.36706e-07	1.96708e-06	[-1]	Group11	20	3	[YWHAB, YWHAH, YWHAQ]
Hs 578T	secretome	REACTOME_Pathways_25.05.2022	R-HSA:5663205	Infectious disease	2.85646e-08	5.69506e-07	6.9295e-08	2.91039e-07	[-1]	Group12	3.81605	39	[ACTR3, APP, B2M, CALM1, CTSL, EEF1A1, HLA-A, HLA-B, HNRNPK, HSP90AA1, HSPA1A, NPM1, NRP1, PSMB1, PSMB3, PSMD9, RANBP1, RPL10A, RPL12, RPLP0, RPLP1, RPLP2, RPS12, RPS21, RPS27A, SFPQ, SNRPD1, SUGT1, TUBA1A, TUBA1B, TUBA3C, TUBA3E, TUBB4B, TXN, UBE2N, XRCC6, YWHAB, YWHAH, YWHAQ]
Hs 578T	secretome	REACTOME_Pathways_25.05.2022	R-HSA:9824446	Viral Infection Pathways	1.64605e-07	2.76364e-06	6.9295e-08	2.91039e-07	[-1]	Group12	3.9759	33	[B2M, CTSL, EEF1A1, HLA-A, HLA-B, HNRNPK, HSP90AA1, HSPA1A, NPM1, NRP1, PSMB1, PSMB3, PSMD9, RANBP1, RPL10A, RPL12, RPLP0, RPLP1, RPLP2, RPS12, RPS21, RPS27A, SNRPD1, TUBA1A, TUBA1B, TUBA3C, TUBA3E, TUBB4B, UBE2N, XRCC6, YWHAB, YWHAH, YWHAQ]
Hs 578T	secretome	REACTOME_Pathways_25.05.2022	R-HSA:1236977	Endosomal/Vacuolar pathway	1.46098e-05	7.17003e-05	6.9295e-08	2.91039e-07	[-1]	Group12	36.3636	4	[B2M, CTSL, HLA-A, HLA-B]
Hs 578T	secretome	REACTOME_Pathways_25.05.2022	R-HSA:9705683	SARS-CoV-2-host interactions	5.17879e-05	0.000209118	6.9295e-08	2.91039e-07	[-1]	Group12	5.91133	12	[B2M, HLA-A, HLA-B, HSP90AA1, RPS12, RPS21, RPS27A, SNRPD1, UBE2N, YWHAB, YWHAH, YWHAQ]
Hs 578T	secretome	REACTOME_Pathways_25.05.2022	R-HSA:9692914	SARS-CoV-1-host interactions	9.10385e-05	0.000326306	6.9295e-08	2.91039e-07	[-1]	Group12	8.33333	8	[EEF1A1, NPM1, RPS12, RPS21, RPS27A, YWHAB, YWHAH, YWHAQ]
Hs 578T	secretome	REACTOME_Pathways_25.05.2022	R-HSA:9694516	SARS-CoV-2 Infection	0.000154034	0.000522733	6.9295e-08	2.91039e-07	[-1]	Group12	4.68227	14	[B2M, CTSL, HLA-A, HLA-B, HSP90AA1, NRP1, RPS12, RPS21, RPS27A, SNRPD1, UBE2N, YWHAB, YWHAH, YWHAQ]
Hs 578T	secretome	REACTOME_Pathways_25.05.2022	R-HSA:1236975	Antigen processing-Cross presentation	0.000170887	0.000561988	6.9295e-08	2.91039e-07	[-1]	Group12	7.61905	8	[B2M, CTSL, HLA-A, HLA-B, PSMB1, PSMB3, PSMD9, RPS27A]
Hs 578T	secretome	REACTOME_Pathways_25.05.2022	R-HSA:9678108	SARS-CoV-1 Infection	0.000272958	0.000821448	6.9295e-08	2.91039e-07	[-1]	Group12	6.33803	9	[CTSL, EEF1A1, NPM1, RPS12, RPS21, RPS27A, YWHAB, YWHAH, YWHAQ]
Hs 578T	secretome	REACTOME_Pathways_25.05.2022	R-HSA:9679506	SARS-CoV Infections	0.000464283	0.00126586	6.9295e-08	2.91039e-07	[-1]	Group12	3.86473	16	[B2M, CTSL, EEF1A1, HLA-A, HLA-B, HSP90AA1, NPM1, NRP1, RPS12, RPS21, RPS27A, SNRPD1, UBE2N, YWHAB, YWHAH, YWHAQ]
Hs 578T	secretome	REACTOME_Pathways_25.05.2022	R-HSA:1445148	Translocation of SLC2A4 (GLUT4) to the plasma membrane	1.13357e-06	1.09579e-05	0.000555624	0.000614111	[-1]	Group13	12.5	9	[CALM1, TUBA1A, TUBA1B, TUBA3C, TUBA3E, TUBB4B, YWHAB, YWHAH, YWHAQ]
Hs 578T	secretome	REACTOME_Pathways_25.05.2022	R-HSA:195258	RHO GTPase Effectors	7.34132e-06	4.33682e-05	0.000555624	0.000614111	[-1]	Group13	5.21472	17	[ACTR3, CALM1, CTTN, MAPRE1, MYL12B, MYL6, NUDC, PPP2R1A, RHOC, TUBA1A, TUBA1B, TUBA3C, TUBA3E, TUBB4B, YWHAB, YWHAH, YWHAQ]
Hs 578T	secretome	REACTOME_Pathways_25.05.2022	R-HSA:9716542	Signaling by Rho GTPases, Miro GTPases and RHOBTB3	8.25153e-06	4.61796e-05	0.000555624	0.000614111	[-1]	Group13	3.73961	27	[ACTR3, ARHGDIA, CALM1, CCT6A, CTTN, EFHD2, HSP90AA1, HSPE1, MAPRE1, MYL12B, MYL6, NSFL1C, NUDC, PLIN3, PPP2R1A, RHOC, TMPO, TPM4, TUBA1A, TUBA1B, TUBA3C, TUBA3E, TUBB4B, TXNL1, YWHAB, YWHAH, YWHAQ]
Hs 578T	secretome	REACTOME_Pathways_25.05.2022	R-HSA:380320	Recruitment of NuMA to mitotic centrosomes	1.07018e-05	5.68981e-05	0.000555624	0.000614111	[-1]	Group13	9.57447	9	[DCTN2, HSP90AA1, MAPRE1, PPP2R1A, TUBA1A, TUBA1B, TUBA3C, TUBA3E, TUBB4B]
Hs 578T	secretome	REACTOME_Pathways_25.05.2022	R-HSA:194315	Signaling by Rho GTPases	1.62517e-05	7.85497e-05	0.000555624	0.000614111	[-1]	Group13	3.68272	26	[ACTR3, ARHGDIA, CALM1, CCT6A, CTTN, EFHD2, HSP90AA1, HSPE1, MAPRE1, MYL12B, MYL6, NSFL1C, NUDC, PPP2R1A, RHOC, TMPO, TPM4, TUBA1A, TUBA1B, TUBA3C, TUBA3E, TUBB4B, TXNL1, YWHAB, YWHAH, YWHAQ]
Hs 578T	secretome	REACTOME_Pathways_25.05.2022	R-HSA:168256	Immune System	6.54328e-06	4.09276e-05	6.54328e-06	1.05699e-05	[-1]	Group09	2.6777	55	[ACTR3, ANXA1, ANXA2, APP, B2M, B4GALT1, C1R, CALM1, CAP1, CAPZA2, CASP8, COL1A1, COL1A2, COL3A1, CST3, CSTB, CTSD, CTSL, DCTN2, EEF1A1, HLA-A, HLA-B, HNRNPA2B1, HSP90AA1, HSPA1A, HSPA2, HSPA6, MMP2, MT2A, NPM1, PA2G4, PDAP1, PGAM1, PPP2R1A, PRDX6, PSMB1, PSMB3, PSMD9, QSOX1, RPLP0, RPS27A, S100A11, SERPINB6, SUGT1, TIMP1, TIMP2, TUBA1A, TUBA1B, TUBA3C, TUBA3E, TUBB4B, TXN, UBE2N, XRCC6, YWHAB]
Hs 578T	secretome	REACTOME_Pathways_25.05.2022	R-HSA:5663220	RHO GTPases Activate Formins	0.00024549	0.000745821	0.000555624	0.000614111	[-1]	Group13	6.42857	9	[MAPRE1, NUDC, PPP2R1A, RHOC, TUBA1A, TUBA1B, TUBA3C, TUBA3E, TUBB4B]
Hs 578T	secretome	REACTOME_Pathways_25.05.2022	R-HSA:9648025	EML4 and NUDC in mitotic spindle formation	0.000359324	0.00103265	0.000555624	0.000614111	[-1]	Group13	6.83761	8	[MAPRE1, NUDC, PPP2R1A, TUBA1A, TUBA1B, TUBA3C, TUBA3E, TUBB4B]
Hs 578T	secretome	REACTOME_Pathways_25.05.2022	R-HSA:2500257	Resolution of Sister Chromatid Cohesion	0.000590943	0.00157092	0.000555624	0.000614111	[-1]	Group13	6.34921	8	[MAPRE1, NUDC, PPP2R1A, TUBA1A, TUBA1B, TUBA3C, TUBA3E, TUBB4B]
Hs 578T	secretome	REACTOME_Pathways_25.05.2022	R-HSA:1640170	Cell Cycle	0.000870213	0.00218581	0.000555624	0.000614111	[-1]	Group13	3.18379	22	[DCTN2, HSP90AA1, HSPA2, MAPRE1, NPM1, NUDC, PCNA, PPP2R1A, PSMB1, PSMB3, PSMD9, RPS27A, TMPO, TUBA1A, TUBA1B, TUBA3C, TUBA3E, TUBB4B, UBE2N, YWHAB, YWHAH, YWHAQ]
Hs 578T	secretome	REACTOME_Pathways_25.05.2022	R-HSA:68877	Mitotic Prometaphase	0.000966631	0.00239035	0.000555624	0.000614111	[-1]	Group13	4.90196	10	[DCTN2, HSP90AA1, MAPRE1, NUDC, PPP2R1A, TUBA1A, TUBA1B, TUBA3C, TUBA3E, TUBB4B]
Hs 578T	secretome	REACTOME_Pathways_25.05.2022	R-HSA:68886	M Phase	0.00141027	0.00335729	0.000555624	0.000614111	[-1]	Group13	3.60577	15	[DCTN2, HSP90AA1, MAPRE1, NUDC, PPP2R1A, PSMB1, PSMB3, PSMD9, RPS27A, TMPO, TUBA1A, TUBA1B, TUBA3C, TUBA3E, TUBB4B]
Hs 578T	secretome	REACTOME_Pathways_25.05.2022	R-HSA:156902	Peptide chain elongation	7.47722e-06	4.33679e-05	1.56669e-06	2.99096e-06	[-1]	Group14	10	9	[EEF1A1, RPL10A, RPL12, RPLP0, RPLP1, RPLP2, RPS12, RPS21, RPS27A]
Hs 578T	secretome	REACTOME_Pathways_25.05.2022	R-HSA:9705683	SARS-CoV-2-host interactions	5.17879e-05	0.000209118	1.56669e-06	2.99096e-06	[-1]	Group14	5.91133	12	[B2M, HLA-A, HLA-B, HSP90AA1, RPS12, RPS21, RPS27A, SNRPD1, UBE2N, YWHAB, YWHAH, YWHAQ]
Hs 578T	secretome	REACTOME_Pathways_25.05.2022	R-HSA:9692914	SARS-CoV-1-host interactions	9.10385e-05	0.000326306	1.56669e-06	2.99096e-06	[-1]	Group14	8.33333	8	[EEF1A1, NPM1, RPS12, RPS21, RPS27A, YWHAB, YWHAH, YWHAQ]
Hs 578T	secretome	REACTOME_Pathways_25.05.2022	R-HSA:9694516	SARS-CoV-2 Infection	0.000154034	0.000522733	1.56669e-06	2.99096e-06	[-1]	Group14	4.68227	14	[B2M, CTSL, HLA-A, HLA-B, HSP90AA1, NRP1, RPS12, RPS21, RPS27A, SNRPD1, UBE2N, YWHAB, YWHAH, YWHAQ]
Hs 578T	secretome	REACTOME_Pathways_25.05.2022	R-HSA:9678108	SARS-CoV-1 Infection	0.000272958	0.000821448	1.56669e-06	2.99096e-06	[-1]	Group14	6.33803	9	[CTSL, EEF1A1, NPM1, RPS12, RPS21, RPS27A, YWHAB, YWHAH, YWHAQ]
Hs 578T	secretome	REACTOME_Pathways_25.05.2022	R-HSA:9679506	SARS-CoV Infections	0.000464283	0.00126586	1.56669e-06	2.99096e-06	[-1]	Group14	3.86473	16	[B2M, CTSL, EEF1A1, HLA-A, HLA-B, HSP90AA1, NPM1, NRP1, RPS12, RPS21, RPS27A, SNRPD1, UBE2N, YWHAB, YWHAH, YWHAQ]
Hs 578T	secretome	REACTOME_Pathways_25.05.2022	R-HSA:9755779	SARS-CoV-2 targets host intracellular signalling and regulatory pathways	0.000652444	0.00170598	1.56669e-06	2.99096e-06	[-1]	Group14	25	3	[YWHAB, YWHAH, YWHAQ]
Hs 578T	secretome	REACTOME_Pathways_25.05.2022	R-HSA:75035	Chk1/Chk2(Cds1) mediated inactivation of Cyclin B:Cdk1 complex	0.000838901	0.00212388	1.56669e-06	2.99096e-06	[-1]	Group14	23.0769	3	[YWHAB, YWHAH, YWHAQ]
Hs 578T	secretome	REACTOME_Pathways_25.05.2022	R-HSA:111447	Activation of BAD and translocation to mitochondria	0.00130561	0.00315522	1.56669e-06	2.99096e-06	[-1]	Group14	20	3	[YWHAB, YWHAH, YWHAQ]
Hs 578T	secretome	REACTOME_Pathways_25.05.2022	R-HSA:9735871	SARS-CoV-1 targets host intracellular signalling and regulatory pathways	0.00130561	0.00315522	1.56669e-06	2.99096e-06	[-1]	Group14	20	3	[YWHAB, YWHAH, YWHAQ]
Hs 578T	secretome	REACTOME_Pathways_25.05.2022	R-HSA:72649	Translation initiation complex formation	0.0018296	0.0041393	1.56669e-06	2.99096e-06	[-1]	Group14	8.47458	5	[EIF3J, PABPC1, RPS12, RPS21, RPS27A]
Hs 578T	secretome	REACTOME_Pathways_25.05.2022	R-HSA:72662	Activation of the mRNA upon binding of the cap-binding complex and eIFs, and subsequent binding to 43S	0.0019722	0.00439953	1.56669e-06	2.99096e-06	[-1]	Group14	8.33333	5	[EIF3J, PABPC1, RPS12, RPS21, RPS27A]
Hs 578T	secretome	REACTOME_Pathways_25.05.2022	R-HSA:9735869	SARS-CoV-1 modulates host translation machinery	0.00216064	0.00475341	1.56669e-06	2.99096e-06	[-1]	Group14	10.8108	4	[EEF1A1, RPS12, RPS21, RPS27A]
Hs 578T	secretome	REACTOME_Pathways_25.05.2022	R-HSA:5663205	Infectious disease	2.85646e-08	5.69506e-07	6.96295e-05	9.74813e-05	[-1]	Group15	3.81605	39	[ACTR3, APP, B2M, CALM1, CTSL, EEF1A1, HLA-A, HLA-B, HNRNPK, HSP90AA1, HSPA1A, NPM1, NRP1, PSMB1, PSMB3, PSMD9, RANBP1, RPL10A, RPL12, RPLP0, RPLP1, RPLP2, RPS12, RPS21, RPS27A, SFPQ, SNRPD1, SUGT1, TUBA1A, TUBA1B, TUBA3C, TUBA3E, TUBB4B, TXN, UBE2N, XRCC6, YWHAB, YWHAH, YWHAQ]
Hs 578T	secretome	REACTOME_Pathways_25.05.2022	R-HSA:376176	Signaling by ROBO receptors	1.65385e-07	2.63789e-06	6.96295e-05	9.74813e-05	[-1]	Group15	7.30594	16	[CAP1, CXCL12, DAG1, NRP1, PABPC1, PSMB1, PSMB3, PSMD9, RPL10A, RPL12, RPLP0, RPLP1, RPLP2, RPS12, RPS21, RPS27A]
Hs 578T	secretome	REACTOME_Pathways_25.05.2022	R-HSA:9824446	Viral Infection Pathways	1.64605e-07	2.76364e-06	6.96295e-05	9.74813e-05	[-1]	Group15	3.9759	33	[B2M, CTSL, EEF1A1, HLA-A, HLA-B, HNRNPK, HSP90AA1, HSPA1A, NPM1, NRP1, PSMB1, PSMB3, PSMD9, RANBP1, RPL10A, RPL12, RPLP0, RPLP1, RPLP2, RPS12, RPS21, RPS27A, SNRPD1, TUBA1A, TUBA1B, TUBA3C, TUBA3E, TUBB4B, UBE2N, XRCC6, YWHAB, YWHAH, YWHAQ]
Hs 578T	secretome	REACTOME_Pathways_25.05.2022	R-HSA:1643685	Disease	6.59581e-07	7.01355e-06	6.96295e-05	9.74813e-05	[-1]	Group15	2.91529	53	[ACTR3, APP, B2M, B4GALT1, B4GAT1, CALM1, CASP8, COL1A1, COL1A2, CTSL, DAG1, DCN, EEF1A1, EEF1G, HLA-A, HLA-B, HNRNPK, HSP90AA1, HSPA1A, LUM, NPM1, NRP1, PPP2R1A, PSMB1, PSMB3, PSMD9, RANBP1, RPL10A, RPL12, RPLP0, RPLP1, RPLP2, RPS12, RPS21, RPS27A, SFPQ, SNRPD1, SUGT1, TFG, THBS1, THBS2, TPM4, TUBA1A, TUBA1B, TUBA3C, TUBA3E, TUBB4B, TXN, UBE2N, XRCC6, YWHAB, YWHAH, YWHAQ]
Hs 578T	secretome	REACTOME_Pathways_25.05.2022	R-HSA:9010553	Regulation of expression of SLITs and ROBOs	1.71662e-06	1.52112e-05	6.96295e-05	9.74813e-05	[-1]	Group15	7.55814	13	[DAG1, PABPC1, PSMB1, PSMB3, PSMD9, RPL10A, RPL12, RPLP0, RPLP1, RPLP2, RPS12, RPS21, RPS27A]
Hs 578T	secretome	REACTOME_Pathways_25.05.2022	R-HSA:168256	Immune System	6.54328e-06	4.09276e-05	1.61784e-09	1.13249e-08	[-1]	Group20	2.6777	55	[ACTR3, ANXA1, ANXA2, APP, B2M, B4GALT1, C1R, CALM1, CAP1, CAPZA2, CASP8, COL1A1, COL1A2, COL3A1, CST3, CSTB, CTSD, CTSL, DCTN2, EEF1A1, HLA-A, HLA-B, HNRNPA2B1, HSP90AA1, HSPA1A, HSPA2, HSPA6, MMP2, MT2A, NPM1, PA2G4, PDAP1, PGAM1, PPP2R1A, PRDX6, PSMB1, PSMB3, PSMD9, QSOX1, RPLP0, RPS27A, S100A11, SERPINB6, SUGT1, TIMP1, TIMP2, TUBA1A, TUBA1B, TUBA3C, TUBA3E, TUBB4B, TXN, UBE2N, XRCC6, YWHAB]
Hs 578T	secretome	REACTOME_Pathways_25.05.2022	R-HSA:913531	Interferon Signaling	1.17861e-05	6.16357e-05	6.96295e-05	9.74813e-05	[-1]	Group15	5.57621	15	[B2M, HLA-A, HLA-B, HSPA1A, HSPA2, MT2A, NPM1, PPP2R1A, RPS27A, TUBA1A, TUBA1B, TUBA3C, TUBA3E, TUBB4B, UBE2N]
Hs 578T	secretome	REACTOME_Pathways_25.05.2022	R-HSA:1280215	Cytokine Signaling in Immune system	1.85077e-05	8.68228e-05	6.96295e-05	9.74813e-05	[-1]	Group15	3.55781	28	[ANXA1, ANXA2, APP, B2M, CASP8, COL1A2, HLA-A, HLA-B, HNRNPA2B1, HSP90AA1, HSPA1A, HSPA2, MMP2, MT2A, NPM1, PPP2R1A, PSMB1, PSMB3, PSMD9, RPLP0, RPS27A, TIMP1, TUBA1A, TUBA1B, TUBA3C, TUBA3E, TUBB4B, UBE2N]
Hs 578T	secretome	REACTOME_Pathways_25.05.2022	R-HSA:2262752	Cellular responses to stress	2.45121e-05	0.000110132	6.96295e-05	9.74813e-05	[-1]	Group15	3.47826	28	[CAPZA2, DCTN2, EEF1A1, HSP90AA1, HSPA1A, HSPA2, HSPA4, HSPA6, HSPH1, IGFBP7, PRDX6, PSMB1, PSMB3, PSMD9, RPL10A, RPL12, RPLP0, RPLP1, RPLP2, RPS12, RPS21, RPS27A, TUBA1A, TUBA1B, TUBA3C, TUBA3E, TUBB4B, TXN]
Hs 578T	secretome	REACTOME_Pathways_25.05.2022	R-HSA:9705683	SARS-CoV-2-host interactions	5.17879e-05	0.000209118	6.96295e-05	9.74813e-05	[-1]	Group15	5.91133	12	[B2M, HLA-A, HLA-B, HSP90AA1, RPS12, RPS21, RPS27A, SNRPD1, UBE2N, YWHAB, YWHAH, YWHAQ]
Hs 578T	secretome	REACTOME_Pathways_25.05.2022	R-HSA:168255	Influenza Infection	0.000119791	0.000419927	6.96295e-05	9.74813e-05	[-1]	Group15	6.36943	10	[HSP90AA1, HSPA1A, RPL10A, RPL12, RPLP0, RPLP1, RPLP2, RPS12, RPS21, RPS27A]
Hs 578T	secretome	REACTOME_Pathways_25.05.2022	R-HSA:9694516	SARS-CoV-2 Infection	0.000154034	0.000522733	6.96295e-05	9.74813e-05	[-1]	Group15	4.68227	14	[B2M, CTSL, HLA-A, HLA-B, HSP90AA1, NRP1, RPS12, RPS21, RPS27A, SNRPD1, UBE2N, YWHAB, YWHAH, YWHAQ]
Hs 578T	secretome	REACTOME_Pathways_25.05.2022	R-HSA:9006934	Signaling by Receptor Tyrosine Kinases	4.03725e-06	2.79974e-05	0.000191907	0.000251877	[-1]	Group05	4.32331	23	[CALM1, COL1A1, COL1A2, COL3A1, COL4A2, COL5A1, COL5A2, COL6A1, COL6A2, CTSD, CXCL12, HSP90AA1, HSPB1, LAMB1, LAMC1, NRP1, PPP2R1A, RPS27A, SPARC, STMN1, THBS1, THBS2, YWHAB]
Hs 578T	secretome	REACTOME_Pathways_25.05.2022	R-HSA:9679506	SARS-CoV Infections	0.000464283	0.00126586	6.96295e-05	9.74813e-05	[-1]	Group15	3.86473	16	[B2M, CTSL, EEF1A1, HLA-A, HLA-B, HSP90AA1, NPM1, NRP1, RPS12, RPS21, RPS27A, SNRPD1, UBE2N, YWHAB, YWHAH, YWHAQ]
Hs 578T	secretome	REACTOME_Pathways_25.05.2022	R-HSA:1640170	Cell Cycle	0.000870213	0.00218581	6.96295e-05	9.74813e-05	[-1]	Group15	3.18379	22	[DCTN2, HSP90AA1, HSPA2, MAPRE1, NPM1, NUDC, PCNA, PPP2R1A, PSMB1, PSMB3, PSMD9, RPS27A, TMPO, TUBA1A, TUBA1B, TUBA3C, TUBA3E, TUBB4B, UBE2N, YWHAB, YWHAH, YWHAQ]
Hs 578T	secretome	REACTOME_Pathways_25.05.2022	R-HSA:1280218	Adaptive Immune System	0.00161814	0.0037955	6.96295e-05	9.74813e-05	[-1]	Group15	2.99479	23	[B2M, CALM1, CAPZA2, COL1A1, COL1A2, COL3A1, CTSD, CTSL, DCTN2, HLA-A, HLA-B, PPP2R1A, PSMB1, PSMB3, PSMD9, RPS27A, TUBA1A, TUBA1B, TUBA3C, TUBA3E, TUBB4B, UBE2N, YWHAB]
Hs 578T	secretome	REACTOME_Pathways_25.05.2022	R-HSA:422475	Axon guidance	6.02558e-15	6.4072e-13	1.27322e-12	2.67376e-11	[-1]	Group16	6.69078	37	[ACTR3, CAP1, CLTB, COL3A1, COL4A2, COL5A1, COL5A2, COL6A1, COL6A2, CXCL12, DAG1, HSP90AA1, L1CAM, LAMB1, LAMC1, MMP2, MYL12B, MYL6, NRP1, PABPC1, PSMB1, PSMB3, PSMD9, RHOC, RPL10A, RPL12, RPLP0, RPLP1, RPLP2, RPS12, RPS21, RPS27A, TUBA1A, TUBA1B, TUBA3C, TUBA3E, TUBB4B]
Hs 578T	secretome	REACTOME_Pathways_25.05.2022	R-HSA:9675108	Nervous system development	2.42727e-14	1.93575e-12	1.27322e-12	2.67376e-11	[-1]	Group16	6.40138	37	[ACTR3, CAP1, CLTB, COL3A1, COL4A2, COL5A1, COL5A2, COL6A1, COL6A2, CXCL12, DAG1, HSP90AA1, L1CAM, LAMB1, LAMC1, MMP2, MYL12B, MYL6, NRP1, PABPC1, PSMB1, PSMB3, PSMD9, RHOC, RPL10A, RPL12, RPLP0, RPLP1, RPLP2, RPS12, RPS21, RPS27A, TUBA1A, TUBA1B, TUBA3C, TUBA3E, TUBB4B]
Hs 578T	secretome	REACTOME_Pathways_25.05.2022	R-HSA:3371497	HSP90 chaperone cycle for steroid hormone receptors (SHR) in the presence of ligand	6.91258e-09	2.20511e-07	1.27322e-12	2.67376e-11	[-1]	Group16	18.1818	10	[CAPZA2, DCTN2, HSP90AA1, HSPA1A, HSPA2, TUBA1A, TUBA1B, TUBA3C, TUBA3E, TUBB4B]
Hs 578T	secretome	REACTOME_Pathways_25.05.2022	R-HSA:8852276	The role of GTSE1 in G2/M progression after G2 checkpoint	1.6907e-08	3.59555e-07	1.27322e-12	2.67376e-11	[-1]	Group16	14.2857	11	[HSP90AA1, MAPRE1, PSMB1, PSMB3, PSMD9, RPS27A, TUBA1A, TUBA1B, TUBA3C, TUBA3E, TUBB4B]
Hs 578T	secretome	REACTOME_Pathways_25.05.2022	R-HSA:5663205	Infectious disease	2.85646e-08	5.69506e-07	1.27322e-12	2.67376e-11	[-1]	Group16	3.81605	39	[ACTR3, APP, B2M, CALM1, CTSL, EEF1A1, HLA-A, HLA-B, HNRNPK, HSP90AA1, HSPA1A, NPM1, NRP1, PSMB1, PSMB3, PSMD9, RANBP1, RPL10A, RPL12, RPLP0, RPLP1, RPLP2, RPS12, RPS21, RPS27A, SFPQ, SNRPD1, SUGT1, TUBA1A, TUBA1B, TUBA3C, TUBA3E, TUBB4B, TXN, UBE2N, XRCC6, YWHAB, YWHAH, YWHAQ]
Hs 578T	secretome	REACTOME_Pathways_25.05.2022	R-HSA:376176	Signaling by ROBO receptors	1.65385e-07	2.63789e-06	1.27322e-12	2.67376e-11	[-1]	Group16	7.30594	16	[CAP1, CXCL12, DAG1, NRP1, PABPC1, PSMB1, PSMB3, PSMD9, RPL10A, RPL12, RPLP0, RPLP1, RPLP2, RPS12, RPS21, RPS27A]
Hs 578T	secretome	REACTOME_Pathways_25.05.2022	R-HSA:9824446	Viral Infection Pathways	1.64605e-07	2.76364e-06	1.27322e-12	2.67376e-11	[-1]	Group16	3.9759	33	[B2M, CTSL, EEF1A1, HLA-A, HLA-B, HNRNPK, HSP90AA1, HSPA1A, NPM1, NRP1, PSMB1, PSMB3, PSMD9, RANBP1, RPL10A, RPL12, RPLP0, RPLP1, RPLP2, RPS12, RPS21, RPS27A, SNRPD1, TUBA1A, TUBA1B, TUBA3C, TUBA3E, TUBB4B, UBE2N, XRCC6, YWHAB, YWHAH, YWHAQ]
Hs 578T	secretome	REACTOME_Pathways_25.05.2022	R-HSA:9010553	Regulation of expression of SLITs and ROBOs	1.71662e-06	1.52112e-05	1.27322e-12	2.67376e-11	[-1]	Group16	7.55814	13	[DAG1, PABPC1, PSMB1, PSMB3, PSMD9, RPL10A, RPL12, RPLP0, RPLP1, RPLP2, RPS12, RPS21, RPS27A]
Hs 578T	secretome	REACTOME_Pathways_25.05.2022	R-HSA:9006934	Signaling by Receptor Tyrosine Kinases	4.03725e-06	2.79974e-05	2.28123e-07	6.84369e-07	[-1]	Group18	4.32331	23	[CALM1, COL1A1, COL1A2, COL3A1, COL4A2, COL5A1, COL5A2, COL6A1, COL6A2, CTSD, CXCL12, HSP90AA1, HSPB1, LAMB1, LAMC1, NRP1, PPP2R1A, RPS27A, SPARC, STMN1, THBS1, THBS2, YWHAB]
Hs 578T	secretome	REACTOME_Pathways_25.05.2022	R-HSA:156902	Peptide chain elongation	7.47722e-06	4.33679e-05	1.27322e-12	2.67376e-11	[-1]	Group16	10	9	[EEF1A1, RPL10A, RPL12, RPLP0, RPLP1, RPLP2, RPS12, RPS21, RPS27A]
Hs 578T	secretome	REACTOME_Pathways_25.05.2022	R-HSA:69275	G2/M Transition	7.71043e-06	4.39219e-05	1.27322e-12	2.67376e-11	[-1]	Group16	6.59898	13	[DCTN2, HSP90AA1, MAPRE1, PPP2R1A, PSMB1, PSMB3, PSMD9, RPS27A, TUBA1A, TUBA1B, TUBA3C, TUBA3E, TUBB4B]
Hs 578T	secretome	REACTOME_Pathways_25.05.2022	R-HSA:453274	Mitotic G2-G2/M phases	8.6043e-06	4.73236e-05	1.27322e-12	2.67376e-11	[-1]	Group16	6.53266	13	[DCTN2, HSP90AA1, MAPRE1, PPP2R1A, PSMB1, PSMB3, PSMD9, RPS27A, TUBA1A, TUBA1B, TUBA3C, TUBA3E, TUBB4B]
Hs 578T	secretome	REACTOME_Pathways_25.05.2022	R-HSA:2262752	Cellular responses to stress	2.45121e-05	0.000110132	1.27322e-12	2.67376e-11	[-1]	Group16	3.47826	28	[CAPZA2, DCTN2, EEF1A1, HSP90AA1, HSPA1A, HSPA2, HSPA4, HSPA6, HSPH1, IGFBP7, PRDX6, PSMB1, PSMB3, PSMD9, RPL10A, RPL12, RPLP0, RPLP1, RPLP2, RPS12, RPS21, RPS27A, TUBA1A, TUBA1B, TUBA3C, TUBA3E, TUBB4B, TXN]
Hs 578T	secretome	REACTOME_Pathways_25.05.2022	R-HSA:168255	Influenza Infection	0.000119791	0.000419927	1.27322e-12	2.67376e-11	[-1]	Group16	6.36943	10	[HSP90AA1, HSPA1A, RPL10A, RPL12, RPLP0, RPLP1, RPLP2, RPS12, RPS21, RPS27A]
Hs 578T	secretome	REACTOME_Pathways_25.05.2022	R-HSA:168273	Influenza Viral RNA Transcription and Replication	0.000197402	0.000617365	1.27322e-12	2.67376e-11	[-1]	Group16	6.61765	9	[HSP90AA1, RPL10A, RPL12, RPLP0, RPLP1, RPLP2, RPS12, RPS21, RPS27A]
Hs 578T	secretome	REACTOME_Pathways_25.05.2022	R-HSA:68886	M Phase	0.00141027	0.00335729	1.27322e-12	2.67376e-11	[-1]	Group16	3.60577	15	[DCTN2, HSP90AA1, MAPRE1, NUDC, PPP2R1A, PSMB1, PSMB3, PSMD9, RPS27A, TMPO, TUBA1A, TUBA1B, TUBA3C, TUBA3E, TUBB4B]
Hs 578T	secretome	REACTOME_Pathways_25.05.2022	R-HSA:8852276	The role of GTSE1 in G2/M progression after G2 checkpoint	1.6907e-08	3.59555e-07	3.43789e-07	9.02446e-07	[-1]	Group17	14.2857	11	[HSP90AA1, MAPRE1, PSMB1, PSMB3, PSMD9, RPS27A, TUBA1A, TUBA1B, TUBA3C, TUBA3E, TUBB4B]
Hs 578T	secretome	REACTOME_Pathways_25.05.2022	R-HSA:9010553	Regulation of expression of SLITs and ROBOs	1.71662e-06	1.52112e-05	3.43789e-07	9.02446e-07	[-1]	Group17	7.55814	13	[DAG1, PABPC1, PSMB1, PSMB3, PSMD9, RPL10A, RPL12, RPLP0, RPLP1, RPLP2, RPS12, RPS21, RPS27A]
Hs 578T	secretome	REACTOME_Pathways_25.05.2022	R-HSA:1236977	Endosomal/Vacuolar pathway	1.46098e-05	7.17003e-05	3.43789e-07	9.02446e-07	[-1]	Group17	36.3636	4	[B2M, CTSL, HLA-A, HLA-B]
Hs 578T	secretome	REACTOME_Pathways_25.05.2022	R-HSA:450408	AUF1 (hnRNP D0) binds and destabilizes mRNA	1.83334e-05	8.72886e-05	3.43789e-07	9.02446e-07	[-1]	Group17	12.5	7	[HSPA1A, HSPB1, PABPC1, PSMB1, PSMB3, PSMD9, RPS27A]
Hs 578T	secretome	REACTOME_Pathways_25.05.2022	R-HSA:450531	Regulation of mRNA stability by proteins that bind AU-rich elements	4.88194e-05	0.000202252	3.43789e-07	9.02446e-07	[-1]	Group17	9.09091	8	[HSPA1A, HSPB1, PABPC1, PSMB1, PSMB3, PSMD9, RPS27A, YWHAB]
Hs 578T	secretome	REACTOME_Pathways_25.05.2022	R-HSA:9694516	SARS-CoV-2 Infection	0.000154034	0.000522733	3.43789e-07	9.02446e-07	[-1]	Group17	4.68227	14	[B2M, CTSL, HLA-A, HLA-B, HSP90AA1, NRP1, RPS12, RPS21, RPS27A, SNRPD1, UBE2N, YWHAB, YWHAH, YWHAQ]
Hs 578T	secretome	REACTOME_Pathways_25.05.2022	R-HSA:1236975	Antigen processing-Cross presentation	0.000170887	0.000561988	3.43789e-07	9.02446e-07	[-1]	Group17	7.61905	8	[B2M, CTSL, HLA-A, HLA-B, PSMB1, PSMB3, PSMD9, RPS27A]
Hs 578T	secretome	REACTOME_Pathways_25.05.2022	R-HSA:168643	Nucleotide-binding domain, leucine rich repeat containing receptor (NLR) signaling pathways	0.000196216	0.000619733	3.43789e-07	9.02446e-07	[-1]	Group17	10.5263	6	[APP, CASP8, RPS27A, SUGT1, TXN, UBE2N]
Hs 578T	secretome	REACTOME_Pathways_25.05.2022	R-HSA:9612973	Autophagy	8.65604e-05	0.000317388	2.18762e-05	3.28144e-05	[-1]	Group10	6.62252	10	[EEF1A1, HSP90AA1, PLIN3, RPS27A, TUBA1A, TUBA1B, TUBA3C, TUBA3E, TUBB4B, UBE2N]
Hs 578T	secretome	REACTOME_Pathways_25.05.2022	R-HSA:5610787	Hedgehog 'off' state	0.000283562	0.000845385	3.43789e-07	9.02446e-07	[-1]	Group17	7.07965	8	[PSMB1, PSMB3, PSMD9, RPS27A, TUBA1A, TUBA1B, TUBA3C, TUBB4B]
Hs 578T	secretome	REACTOME_Pathways_25.05.2022	R-HSA:1236974	ER-Phagosome pathway	0.000386265	0.00108086	3.43789e-07	9.02446e-07	[-1]	Group17	7.77778	7	[B2M, HLA-A, HLA-B, PSMB1, PSMB3, PSMD9, RPS27A]
Hs 578T	secretome	REACTOME_Pathways_25.05.2022	R-HSA:162909	Host Interactions of HIV factors	0.000726754	0.00188483	3.43789e-07	9.02446e-07	[-1]	Group17	6.15385	8	[B2M, HLA-A, NPM1, PSMB1, PSMB3, PSMD9, RANBP1, RPS27A]
Hs 578T	secretome	REACTOME_Pathways_25.05.2022	R-HSA:5607764	CLEC7A (Dectin-1) signaling	0.000775459	0.00197897	3.43789e-07	9.02446e-07	[-1]	Group17	6.93069	7	[CALM1, CASP8, PSMB1, PSMB3, PSMD9, RPS27A, UBE2N]
Hs 578T	secretome	REACTOME_Pathways_25.05.2022	R-HSA:1280218	Adaptive Immune System	0.00161814	0.0037955	3.43789e-07	9.02446e-07	[-1]	Group17	2.99479	23	[B2M, CALM1, CAPZA2, COL1A1, COL1A2, COL3A1, CTSD, CTSL, DCTN2, HLA-A, HLA-B, PPP2R1A, PSMB1, PSMB3, PSMD9, RPS27A, TUBA1A, TUBA1B, TUBA3C, TUBA3E, TUBB4B, UBE2N, YWHAB]
Hs 578T	secretome	REACTOME_Pathways_25.05.2022	R-HSA:9020702	Interleukin-1 signaling	0.00166021	0.00386575	3.43789e-07	9.02446e-07	[-1]	Group17	6.08696	7	[APP, CASP8, PSMB1, PSMB3, PSMD9, RPS27A, UBE2N]
Hs 578T	secretome	REACTOME_Pathways_25.05.2022	R-HSA:5358351	Signaling by Hedgehog	0.00175458	0.00402671	3.43789e-07	9.02446e-07	[-1]	Group17	5.36913	8	[PSMB1, PSMB3, PSMD9, RPS27A, TUBA1A, TUBA1B, TUBA3C, TUBB4B]
Hs 578T	secretome	REACTOME_Pathways_25.05.2022	R-HSA:3000178	ECM proteoglycans	7.14373e-16	1.13942e-13	2.28123e-07	6.84369e-07	[-1]	Group18	22.3684	17	[APP, COL1A1, COL1A2, COL3A1, COL4A2, COL5A1, COL5A2, COL6A1, COL6A2, DAG1, DCN, LAMB1, LAMC1, LUM, SERPINE1, SPARC, TGFB2]
Hs 578T	secretome	REACTOME_Pathways_25.05.2022	R-HSA:9612973	Autophagy	8.65604e-05	0.000317388	1.61784e-09	1.13249e-08	[-1]	Group20	6.62252	10	[EEF1A1, HSP90AA1, PLIN3, RPS27A, TUBA1A, TUBA1B, TUBA3C, TUBA3E, TUBB4B, UBE2N]
Hs 578T	secretome	REACTOME_Pathways_25.05.2022	R-HSA:1474228	Degradation of the extracellular matrix	2.55867e-10	1.63243e-08	2.28123e-07	6.84369e-07	[-1]	Group18	11.4286	16	[COL1A1, COL1A2, COL3A1, COL4A2, COL5A1, COL5A2, COL6A1, COL6A2, CTSD, CTSL, DCN, LAMB1, LAMC1, MMP2, TIMP1, TIMP2]
Hs 578T	secretome	REACTOME_Pathways_25.05.2022	R-HSA:1474290	Collagen formation	6.98036e-10	3.71123e-08	2.28123e-07	6.84369e-07	[-1]	Group18	14.4444	13	[COL1A1, COL1A2, COL3A1, COL4A2, COL5A1, COL5A2, COL6A1, COL6A2, CTSL, LOXL2, PCOLCE, PLOD1, SERPINH1]
Hs 578T	secretome	REACTOME_Pathways_25.05.2022	R-HSA:2022090	Assembly of collagen fibrils and other multimeric structures	1.29978e-09	5.9233e-08	2.28123e-07	6.84369e-07	[-1]	Group18	18.0328	11	[COL1A1, COL1A2, COL3A1, COL4A2, COL5A1, COL5A2, COL6A1, COL6A2, CTSL, LOXL2, PCOLCE]
Hs 578T	secretome	REACTOME_Pathways_25.05.2022	R-HSA:1442490	Collagen degradation	2.22416e-09	8.86885e-08	2.28123e-07	6.84369e-07	[-1]	Group18	17.1875	11	[COL1A1, COL1A2, COL3A1, COL4A2, COL5A1, COL5A2, COL6A1, COL6A2, CTSD, CTSL, MMP2]
Hs 578T	secretome	REACTOME_Pathways_25.05.2022	R-HSA:1650814	Collagen biosynthesis and modifying enzymes	3.69817e-09	1.3108e-07	2.28123e-07	6.84369e-07	[-1]	Group18	16.4179	11	[COL1A1, COL1A2, COL3A1, COL4A2, COL5A1, COL5A2, COL6A1, COL6A2, PCOLCE, PLOD1, SERPINH1]
Hs 578T	secretome	REACTOME_Pathways_25.05.2022	R-HSA:3000171	Non-integrin membrane-ECM interactions	1.41057e-08	3.21408e-07	2.28123e-07	6.84369e-07	[-1]	Group18	16.9492	10	[COL1A1, COL1A2, COL3A1, COL4A2, COL5A1, COL5A2, DAG1, LAMB1, LAMC1, THBS1]
Hs 578T	secretome	REACTOME_Pathways_25.05.2022	R-HSA:8874081	MET activates PTK2 signaling	2.23004e-07	3.09297e-06	2.28123e-07	6.84369e-07	[-1]	Group18	23.3333	7	[COL1A1, COL1A2, COL3A1, COL5A1, COL5A2, LAMB1, LAMC1]
Hs 578T	secretome	REACTOME_Pathways_25.05.2022	R-HSA:8948216	Collagen chain trimerization	2.34957e-07	3.12297e-06	2.28123e-07	6.84369e-07	[-1]	Group18	18.1818	8	[COL1A1, COL1A2, COL3A1, COL4A2, COL5A1, COL5A2, COL6A1, COL6A2]
Hs 578T	secretome	REACTOME_Pathways_25.05.2022	R-HSA:216083	Integrin cell surface interactions	5.03301e-07	5.73404e-06	2.28123e-07	6.84369e-07	[-1]	Group18	11.7647	10	[COL1A1, COL1A2, COL3A1, COL4A2, COL5A1, COL5A2, COL6A1, COL6A2, LUM, THBS1]
Hs 578T	secretome	REACTOME_Pathways_25.05.2022	R-HSA:8875878	MET promotes cell motility	2.14492e-06	1.75444e-05	2.28123e-07	6.84369e-07	[-1]	Group18	17.0732	7	[COL1A1, COL1A2, COL3A1, COL5A1, COL5A2, LAMB1, LAMC1]
Hs 578T	secretome	REACTOME_Pathways_25.05.2022	R-HSA:186797	Signaling by PDGF	2.12781e-06	1.78624e-05	2.28123e-07	6.84369e-07	[-1]	Group18	13.7931	8	[COL3A1, COL4A2, COL5A1, COL5A2, COL6A1, COL6A2, THBS1, THBS2]
Hs 578T	secretome	REACTOME_Pathways_25.05.2022	R-HSA:3000170	Syndecan interactions	2.31749e-06	1.8482e-05	2.28123e-07	6.84369e-07	[-1]	Group18	22.2222	6	[COL1A1, COL1A2, COL3A1, COL5A1, COL5A2, THBS1]
Hs 578T	secretome	REACTOME_Pathways_25.05.2022	R-HSA:2173782	Binding and Uptake of Ligands by Scavenger Receptors	2.54181e-06	1.93056e-05	2.28123e-07	6.84369e-07	[-1]	Group18	16.6667	7	[COL1A1, COL1A2, COL3A1, COL4A2, HSP90AA1, HSPH1, SPARC]
Hs 578T	secretome	REACTOME_Pathways_25.05.2022	R-HSA:162582	Signal Transduction	0.000191907	0.000612182	0.000191907	0.000251877	[-1]	Group05	2.31036	60	[ACTN2, ACTR3, ANXA1, APP, ARHGDIA, B4GALT1, CALM1, CASP8, CCT6A, CLTB, COL1A1, COL1A2, COL3A1, COL4A2, COL5A1, COL5A2, COL6A1, COL6A2, CTSD, CTTN, CXCL12, EFHD2, FSTL1, HSP90AA1, HSPB1, HSPE1, LAMB1, LAMC1, MAPRE1, MMP2, MYL12B, MYL6, NRP1, NSFL1C, NUDC, PLIN3, PPP2R1A, PSMB1, PSMB3, PSMD9, RHOC, RPS27A, SERPINE1, SFPQ, SPARC, STMN1, TGFB2, THBS1, THBS2, TMPO, TPM4, TUBA1A, TUBA1B, TUBA3C, TUBA3…
Hs 578T	secretome	REACTOME_Pathways_25.05.2022	R-HSA:2243919	Crosslinking of collagen fibrils	5.12865e-06	3.33886e-05	2.28123e-07	6.84369e-07	[-1]	Group18	27.7778	5	[COL1A1, COL1A2, COL4A2, LOXL2, PCOLCE]
Hs 578T	secretome	REACTOME_Pathways_25.05.2022	R-HSA:6806834	Signaling by MET	2.22014e-05	0.000101175	2.28123e-07	6.84369e-07	[-1]	Group18	10.1266	8	[COL1A1, COL1A2, COL3A1, COL5A1, COL5A2, LAMB1, LAMC1, RPS27A]
Hs 578T	secretome	REACTOME_Pathways_25.05.2022	R-HSA:419037	NCAM1 interactions	3.41213e-05	0.000145129	2.28123e-07	6.84369e-07	[-1]	Group18	14.2857	6	[COL3A1, COL4A2, COL5A1, COL5A2, COL6A1, COL6A2]
Hs 578T	secretome	REACTOME_Pathways_25.05.2022	R-HSA:3000480	Scavenging by Class A Receptors	0.000156287	0.000524796	2.28123e-07	6.84369e-07	[-1]	Group18	21.0526	4	[COL1A1, COL1A2, COL3A1, COL4A2]
Hs 578T	secretome	REACTOME_Pathways_25.05.2022	R-HSA:162582	Signal Transduction	0.000191907	0.000612182	0.000555624	0.000614111	[-1]	Group13	2.31036	60	[ACTN2, ACTR3, ANXA1, APP, ARHGDIA, B4GALT1, CALM1, CASP8, CCT6A, CLTB, COL1A1, COL1A2, COL3A1, COL4A2, COL5A1, COL5A2, COL6A1, COL6A2, CTSD, CTTN, CXCL12, EFHD2, FSTL1, HSP90AA1, HSPB1, HSPE1, LAMB1, LAMC1, MAPRE1, MMP2, MYL12B, MYL6, NRP1, NSFL1C, NUDC, PLIN3, PPP2R1A, PSMB1, PSMB3, PSMD9, RHOC, RPS27A, SERPINE1, SFPQ, SPARC, STMN1, TGFB2, THBS1, THBS2, TMPO, TPM4, TUBA1A, TUBA1B, TUBA3C, TUBA3…
Hs 578T	secretome	REACTOME_Pathways_25.05.2022	R-HSA:375165	NCAM signaling for neurite out-growth	0.000341276	0.000989701	2.28123e-07	6.84369e-07	[-1]	Group18	9.52381	6	[COL3A1, COL4A2, COL5A1, COL5A2, COL6A1, COL6A2]
Hs 578T	secretome	REACTOME_Pathways_25.05.2022	R-HSA:2214320	Anchoring fibril formation	0.00130561	0.00315522	2.28123e-07	6.84369e-07	[-1]	Group18	20	3	[COL1A1, COL1A2, COL4A2]
Hs 578T	secretome	REACTOME_Pathways_25.05.2022	R-HSA:422475	Axon guidance	6.02558e-15	6.4072e-13	9.81234e-11	1.0303e-09	[-1]	Group19	6.69078	37	[ACTR3, CAP1, CLTB, COL3A1, COL4A2, COL5A1, COL5A2, COL6A1, COL6A2, CXCL12, DAG1, HSP90AA1, L1CAM, LAMB1, LAMC1, MMP2, MYL12B, MYL6, NRP1, PABPC1, PSMB1, PSMB3, PSMD9, RHOC, RPL10A, RPL12, RPLP0, RPLP1, RPLP2, RPS12, RPS21, RPS27A, TUBA1A, TUBA1B, TUBA3C, TUBA3E, TUBB4B]
Hs 578T	secretome	REACTOME_Pathways_25.05.2022	R-HSA:9675108	Nervous system development	2.42727e-14	1.93575e-12	9.81234e-11	1.0303e-09	[-1]	Group19	6.40138	37	[ACTR3, CAP1, CLTB, COL3A1, COL4A2, COL5A1, COL5A2, COL6A1, COL6A2, CXCL12, DAG1, HSP90AA1, L1CAM, LAMB1, LAMC1, MMP2, MYL12B, MYL6, NRP1, PABPC1, PSMB1, PSMB3, PSMD9, RHOC, RPL10A, RPL12, RPLP0, RPLP1, RPLP2, RPS12, RPS21, RPS27A, TUBA1A, TUBA1B, TUBA3C, TUBA3E, TUBB4B]
Hs 578T	secretome	REACTOME_Pathways_25.05.2022	R-HSA:156842	Eukaryotic Translation Elongation	1.37119e-08	3.3647e-07	9.81234e-11	1.0303e-09	[-1]	Group19	12.766	12	[EEF1A1, EEF1B2, EEF1D, EEF1G, RPL10A, RPL12, RPLP0, RPLP1, RPLP2, RPS12, RPS21, RPS27A]
Hs 578T	secretome	REACTOME_Pathways_25.05.2022	R-HSA:376176	Signaling by ROBO receptors	1.65385e-07	2.63789e-06	9.81234e-11	1.0303e-09	[-1]	Group19	7.30594	16	[CAP1, CXCL12, DAG1, NRP1, PABPC1, PSMB1, PSMB3, PSMD9, RPL10A, RPL12, RPLP0, RPLP1, RPLP2, RPS12, RPS21, RPS27A]
Hs 578T	secretome	REACTOME_Pathways_25.05.2022	R-HSA:9824446	Viral Infection Pathways	1.64605e-07	2.76364e-06	9.81234e-11	1.0303e-09	[-1]	Group19	3.9759	33	[B2M, CTSL, EEF1A1, HLA-A, HLA-B, HNRNPK, HSP90AA1, HSPA1A, NPM1, NRP1, PSMB1, PSMB3, PSMD9, RANBP1, RPL10A, RPL12, RPLP0, RPLP1, RPLP2, RPS12, RPS21, RPS27A, SNRPD1, TUBA1A, TUBA1B, TUBA3C, TUBA3E, TUBB4B, UBE2N, XRCC6, YWHAB, YWHAH, YWHAQ]
Hs 578T	secretome	REACTOME_Pathways_25.05.2022	R-HSA:1266738	Developmental Biology	4.42388e-07	5.42777e-06	9.81234e-11	1.0303e-09	[-1]	Group19	3.30969	42	[ACTR3, CAP1, CLTB, COL3A1, COL4A2, COL5A1, COL5A2, COL6A1, COL6A2, CXCL12, DAG1, HSP90AA1, KRT24, KRT31, KRT5, KRT76, KRT9, L1CAM, LAMB1, LAMC1, MMP2, MYL12B, MYL6, NRP1, PABPC1, PSMB1, PSMB3, PSMD9, RHOC, RPL10A, RPL12, RPLP0, RPLP1, RPLP2, RPS12, RPS21, RPS27A, TUBA1A, TUBA1B, TUBA3C, TUBA3E, TUBB4B]
Hs 578T	secretome	REACTOME_Pathways_25.05.2022	R-HSA:9010553	Regulation of expression of SLITs and ROBOs	1.71662e-06	1.52112e-05	9.81234e-11	1.0303e-09	[-1]	Group19	7.55814	13	[DAG1, PABPC1, PSMB1, PSMB3, PSMD9, RPL10A, RPL12, RPLP0, RPLP1, RPLP2, RPS12, RPS21, RPS27A]
Hs 578T	secretome	REACTOME_Pathways_25.05.2022	R-HSA:162582	Signal Transduction	0.000191907	0.000612182	2.28123e-07	6.84369e-07	[-1]	Group18	2.31036	60	[ACTN2, ACTR3, ANXA1, APP, ARHGDIA, B4GALT1, CALM1, CASP8, CCT6A, CLTB, COL1A1, COL1A2, COL3A1, COL4A2, COL5A1, COL5A2, COL6A1, COL6A2, CTSD, CTTN, CXCL12, EFHD2, FSTL1, HSP90AA1, HSPB1, HSPE1, LAMB1, LAMC1, MAPRE1, MMP2, MYL12B, MYL6, NRP1, NSFL1C, NUDC, PLIN3, PPP2R1A, PSMB1, PSMB3, PSMD9, RHOC, RPS27A, SERPINE1, SFPQ, SPARC, STMN1, TGFB2, THBS1, THBS2, TMPO, TPM4, TUBA1A, TUBA1B, TUBA3C, TUBA3…
Hs 578T	secretome	REACTOME_Pathways_25.05.2022	R-HSA:156827	L13a-mediated translational silencing of Ceruloplasmin expression	6.44075e-06	4.1092e-05	9.81234e-11	1.0303e-09	[-1]	Group19	8.92857	10	[EIF3J, PABPC1, RPL10A, RPL12, RPLP0, RPLP1, RPLP2, RPS12, RPS21, RPS27A]
Hs 578T	secretome	REACTOME_Pathways_25.05.2022	R-HSA:156902	Peptide chain elongation	7.47722e-06	4.33679e-05	9.81234e-11	1.0303e-09	[-1]	Group19	10	9	[EEF1A1, RPL10A, RPL12, RPLP0, RPLP1, RPLP2, RPS12, RPS21, RPS27A]
Hs 578T	secretome	REACTOME_Pathways_25.05.2022	R-HSA:927802	Nonsense-Mediated Decay (NMD)	8.82003e-06	4.7688e-05	9.81234e-11	1.0303e-09	[-1]	Group19	8.62069	10	[PABPC1, PPP2R1A, RPL10A, RPL12, RPLP0, RPLP1, RPLP2, RPS12, RPS21, RPS27A]
Hs 578T	secretome	REACTOME_Pathways_25.05.2022	R-HSA:975957	Nonsense Mediated Decay (NMD) enhanced by the Exon Junction Complex (EJC)	8.82003e-06	4.7688e-05	9.81234e-11	1.0303e-09	[-1]	Group19	8.62069	10	[PABPC1, PPP2R1A, RPL10A, RPL12, RPLP0, RPLP1, RPLP2, RPS12, RPS21, RPS27A]
Hs 578T	secretome	REACTOME_Pathways_25.05.2022	R-HSA:72613	Eukaryotic Translation Initiation	1.19235e-05	6.13484e-05	9.81234e-11	1.0303e-09	[-1]	Group19	8.33333	10	[EIF3J, PABPC1, RPL10A, RPL12, RPLP0, RPLP1, RPLP2, RPS12, RPS21, RPS27A]
Hs 578T	secretome	REACTOME_Pathways_25.05.2022	R-HSA:72737	Cap-dependent Translation Initiation	1.19235e-05	6.13484e-05	9.81234e-11	1.0303e-09	[-1]	Group19	8.33333	10	[EIF3J, PABPC1, RPL10A, RPL12, RPLP0, RPLP1, RPLP2, RPS12, RPS21, RPS27A]
Hs 578T	secretome	REACTOME_Pathways_25.05.2022	R-HSA:975956	Nonsense Mediated Decay (NMD) independent of the Exon Junction Complex (EJC)	1.27166e-05	6.43905e-05	9.81234e-11	1.0303e-09	[-1]	Group19	9.375	9	[PABPC1, RPL10A, RPL12, RPLP0, RPLP1, RPLP2, RPS12, RPS21, RPS27A]
Hs 578T	secretome	REACTOME_Pathways_25.05.2022	R-HSA:450408	AUF1 (hnRNP D0) binds and destabilizes mRNA	1.83334e-05	8.72886e-05	9.81234e-11	1.0303e-09	[-1]	Group19	12.5	7	[HSPA1A, HSPB1, PABPC1, PSMB1, PSMB3, PSMD9, RPS27A]
Hs 578T	secretome	REACTOME_Pathways_25.05.2022	R-HSA:72689	Formation of a pool of free 40S subunits	2.08122e-05	9.6219e-05	9.81234e-11	1.0303e-09	[-1]	Group19	8.82353	9	[EIF3J, RPL10A, RPL12, RPLP0, RPLP1, RPLP2, RPS12, RPS21, RPS27A]
Hs 578T	secretome	REACTOME_Pathways_25.05.2022	R-HSA:2262752	Cellular responses to stress	2.45121e-05	0.000110132	9.81234e-11	1.0303e-09	[-1]	Group19	3.47826	28	[CAPZA2, DCTN2, EEF1A1, HSP90AA1, HSPA1A, HSPA2, HSPA4, HSPA6, HSPH1, IGFBP7, PRDX6, PSMB1, PSMB3, PSMD9, RPL10A, RPL12, RPLP0, RPLP1, RPLP2, RPS12, RPS21, RPS27A, TUBA1A, TUBA1B, TUBA3C, TUBA3E, TUBB4B, TXN]
Hs 578T	secretome	REACTOME_Pathways_25.05.2022	R-HSA:72766	Translation	3.09555e-05	0.000133443	9.81234e-11	1.0303e-09	[-1]	Group19	5.13699	15	[EEF1A1, EEF1B2, EEF1D, EEF1G, EIF3J, PABPC1, RPL10A, RPL12, RPLP0, RPLP1, RPLP2, RPS12, RPS21, RPS27A, SRP9]
Hs 578T	secretome	REACTOME_Pathways_25.05.2022	R-HSA:1799339	SRP-dependent cotranslational protein targeting to membrane	4.71622e-05	0.000197957	9.81234e-11	1.0303e-09	[-1]	Group19	7.9646	9	[RPL10A, RPL12, RPLP0, RPLP1, RPLP2, RPS12, RPS21, RPS27A, SRP9]
Hs 578T	secretome	REACTOME_Pathways_25.05.2022	R-HSA:72706	GTP hydrolysis and joining of the 60S ribosomal subunit	4.71622e-05	0.000197957	9.81234e-11	1.0303e-09	[-1]	Group19	7.9646	9	[EIF3J, RPL10A, RPL12, RPLP0, RPLP1, RPLP2, RPS12, RPS21, RPS27A]
Hs 578T	secretome	REACTOME_Pathways_25.05.2022	R-HSA:450531	Regulation of mRNA stability by proteins that bind AU-rich elements	4.88194e-05	0.000202252	9.81234e-11	1.0303e-09	[-1]	Group19	9.09091	8	[HSPA1A, HSPB1, PABPC1, PSMB1, PSMB3, PSMD9, RPS27A, YWHAB]
Hs 578T	secretome	REACTOME_Pathways_25.05.2022	R-HSA:192823	Viral mRNA Translation	5.7406e-05	0.000223323	9.81234e-11	1.0303e-09	[-1]	Group19	8.88889	8	[RPL10A, RPL12, RPLP0, RPLP1, RPLP2, RPS12, RPS21, RPS27A]
Hs 578T	secretome	REACTOME_Pathways_25.05.2022	R-HSA:2408557	Selenocysteine synthesis	7.83778e-05	0.000294147	9.81234e-11	1.0303e-09	[-1]	Group19	8.51064	8	[RPL10A, RPL12, RPLP0, RPLP1, RPLP2, RPS12, RPS21, RPS27A]
Hs 578T	secretome	REACTOME_Pathways_25.05.2022	R-HSA:72764	Eukaryotic Translation Termination	7.83778e-05	0.000294147	9.81234e-11	1.0303e-09	[-1]	Group19	8.51064	8	[RPL10A, RPL12, RPLP0, RPLP1, RPLP2, RPS12, RPS21, RPS27A]
Hs 578T	secretome	REACTOME_Pathways_25.05.2022	R-HSA:9692914	SARS-CoV-1-host interactions	9.10385e-05	0.000326306	9.81234e-11	1.0303e-09	[-1]	Group19	8.33333	8	[EEF1A1, NPM1, RPS12, RPS21, RPS27A, YWHAB, YWHAH, YWHAQ]
Hs 578T	secretome	REACTOME_Pathways_25.05.2022	R-HSA:168255	Influenza Infection	0.000119791	0.000419927	9.81234e-11	1.0303e-09	[-1]	Group19	6.36943	10	[HSP90AA1, HSPA1A, RPL10A, RPL12, RPLP0, RPLP1, RPLP2, RPS12, RPS21, RPS27A]
Hs 578T	secretome	REACTOME_Pathways_25.05.2022	R-HSA:9633012	Response of EIF2AK4 (GCN2) to amino acid deficiency	0.000139585	0.000478792	9.81234e-11	1.0303e-09	[-1]	Group19	7.84314	8	[RPL10A, RPL12, RPLP0, RPLP1, RPLP2, RPS12, RPS21, RPS27A]
Hs 578T	secretome	REACTOME_Pathways_25.05.2022	R-HSA:168273	Influenza Viral RNA Transcription and Replication	0.000197402	0.000617365	9.81234e-11	1.0303e-09	[-1]	Group19	6.61765	9	[HSP90AA1, RPL10A, RPL12, RPLP0, RPLP1, RPLP2, RPS12, RPS21, RPS27A]
Hs 578T	secretome	REACTOME_Pathways_25.05.2022	R-HSA:8953854	Metabolism of RNA	0.000204629	0.000633755	6.96295e-05	9.74813e-05	[-1]	Group15	3.30579	24	[ALYREF, FUS, HNRNPA2B1, HNRNPK, HNRNPR, HSPA1A, HSPB1, PABPC1, PPP2R1A, PSMB1, PSMB3, PSMD9, RPL10A, RPL12, RPLP0, RPLP1, RPLP2, RPS12, RPS21, RPS27A, SARNP, SF3B4, SNRPD1, YWHAB]
Hs 578T	secretome	REACTOME_Pathways_25.05.2022	R-HSA:9678108	SARS-CoV-1 Infection	0.000272958	0.000821448	9.81234e-11	1.0303e-09	[-1]	Group19	6.33803	9	[CTSL, EEF1A1, NPM1, RPS12, RPS21, RPS27A, YWHAB, YWHAH, YWHAQ]
Hs 578T	secretome	REACTOME_Pathways_25.05.2022	R-HSA:9613829	Chaperone Mediated Autophagy	0.00028482	0.000841273	9.81234e-11	1.0303e-09	[-1]	Group19	18.1818	4	[EEF1A1, HSP90AA1, PLIN3, RPS27A]
Hs 578T	secretome	REACTOME_Pathways_25.05.2022	R-HSA:2408522	Selenoamino acid metabolism	0.000402967	0.00111779	9.81234e-11	1.0303e-09	[-1]	Group19	6.72269	8	[RPL10A, RPL12, RPLP0, RPLP1, RPLP2, RPS12, RPS21, RPS27A]
Hs 578T	secretome	REACTOME_Pathways_25.05.2022	R-HSA:72649	Translation initiation complex formation	0.0018296	0.0041393	9.81234e-11	1.0303e-09	[-1]	Group19	8.47458	5	[EIF3J, PABPC1, RPS12, RPS21, RPS27A]
Hs 578T	secretome	REACTOME_Pathways_25.05.2022	R-HSA:72662	Activation of the mRNA upon binding of the cap-binding complex and eIFs, and subsequent binding to 43S	0.0019722	0.00439953	9.81234e-11	1.0303e-09	[-1]	Group19	8.33333	5	[EIF3J, PABPC1, RPS12, RPS21, RPS27A]
Hs 578T	secretome	REACTOME_Pathways_25.05.2022	R-HSA:9735869	SARS-CoV-1 modulates host translation machinery	0.00216064	0.00475341	9.81234e-11	1.0303e-09	[-1]	Group19	10.8108	4	[EEF1A1, RPS12, RPS21, RPS27A]
Hs 578T	secretome	REACTOME_Pathways_25.05.2022	R-HSA:3371497	HSP90 chaperone cycle for steroid hormone receptors (SHR) in the presence of ligand	6.91258e-09	2.20511e-07	1.61784e-09	1.13249e-08	[-1]	Group20	18.1818	10	[CAPZA2, DCTN2, HSP90AA1, HSPA1A, HSPA2, TUBA1A, TUBA1B, TUBA3C, TUBA3E, TUBB4B]
Hs 578T	secretome	REACTOME_Pathways_25.05.2022	R-HSA:8852276	The role of GTSE1 in G2/M progression after G2 checkpoint	1.6907e-08	3.59555e-07	1.61784e-09	1.13249e-08	[-1]	Group20	14.2857	11	[HSP90AA1, MAPRE1, PSMB1, PSMB3, PSMD9, RPS27A, TUBA1A, TUBA1B, TUBA3C, TUBA3E, TUBB4B]
Hs 578T	secretome	REACTOME_Pathways_25.05.2022	R-HSA:5663205	Infectious disease	2.85646e-08	5.69506e-07	1.61784e-09	1.13249e-08	[-1]	Group20	3.81605	39	[ACTR3, APP, B2M, CALM1, CTSL, EEF1A1, HLA-A, HLA-B, HNRNPK, HSP90AA1, HSPA1A, NPM1, NRP1, PSMB1, PSMB3, PSMD9, RANBP1, RPL10A, RPL12, RPLP0, RPLP1, RPLP2, RPS12, RPS21, RPS27A, SFPQ, SNRPD1, SUGT1, TUBA1A, TUBA1B, TUBA3C, TUBA3E, TUBB4B, TXN, UBE2N, XRCC6, YWHAB, YWHAH, YWHAQ]
Hs 578T	secretome	REACTOME_Pathways_25.05.2022	R-HSA:6811436	COPI-independent Golgi-to-ER retrograde traffic	5.29784e-08	9.94124e-07	1.61784e-09	1.13249e-08	[-1]	Group20	17.6471	9	[CAPZA2, DCTN2, GALNT2, PAFAH1B3, TUBA1A, TUBA1B, TUBA3C, TUBA3E, TUBB4B]
Hs 578T	secretome	REACTOME_Pathways_25.05.2022	R-HSA:9824446	Viral Infection Pathways	1.64605e-07	2.76364e-06	1.61784e-09	1.13249e-08	[-1]	Group20	3.9759	33	[B2M, CTSL, EEF1A1, HLA-A, HLA-B, HNRNPK, HSP90AA1, HSPA1A, NPM1, NRP1, PSMB1, PSMB3, PSMD9, RANBP1, RPL10A, RPL12, RPLP0, RPLP1, RPLP2, RPS12, RPS21, RPS27A, SNRPD1, TUBA1A, TUBA1B, TUBA3C, TUBA3E, TUBB4B, UBE2N, XRCC6, YWHAB, YWHAH, YWHAQ]
Hs 578T	secretome	REACTOME_Pathways_25.05.2022	R-HSA:5653656	Vesicle-mediated transport	1.98886e-07	2.88385e-06	1.61784e-09	1.13249e-08	[-1]	Group20	4.30906	29	[ACTR3, APP, CALM1, CAPZA2, CLTB, COL1A1, COL1A2, COL3A1, COL4A2, CTTN, DCTN2, DNASE2, GALNT2, HSP90AA1, HSPH1, PAFAH1B3, PLIN3, RPS27A, SPARC, TFG, TUBA1A, TUBA1B, TUBA3C, TUBA3E, TUBB4B, UBQLN1, YWHAB, YWHAH, YWHAQ]
Hs 578T	secretome	REACTOME_Pathways_25.05.2022	R-HSA:9646399	Aggrephagy	1.94692e-07	2.95746e-06	1.61784e-09	1.13249e-08	[-1]	Group20	18.6047	8	[HSP90AA1, RPS27A, TUBA1A, TUBA1B, TUBA3C, TUBA3E, TUBB4B, UBE2N]
Hs 578T	secretome	REACTOME_Pathways_25.05.2022	R-HSA:389958	Cooperation of Prefoldin and TriC/CCT in actin and tubulin folding	3.59549e-07	4.58784e-06	1.61784e-09	1.13249e-08	[-1]	Group20	21.875	7	[CCT6A, PFDN4, TUBA1A, TUBA1B, TUBA3C, TUBA3E, TUBB4B]
Hs 578T	secretome	REACTOME_Pathways_25.05.2022	R-HSA:389977	Post-chaperonin tubulin folding pathway	6.2146e-07	6.83606e-06	1.61784e-09	1.13249e-08	[-1]	Group20	27.2727	6	[TBCA, TUBA1A, TUBA1B, TUBA3C, TUBA3E, TUBB4B]
Hs 578T	secretome	REACTOME_Pathways_25.05.2022	R-HSA:1445148	Translocation of SLC2A4 (GLUT4) to the plasma membrane	1.13357e-06	1.09579e-05	1.61784e-09	1.13249e-08	[-1]	Group20	12.5	9	[CALM1, TUBA1A, TUBA1B, TUBA3C, TUBA3E, TUBB4B, YWHAB, YWHAH, YWHAQ]
Hs 578T	secretome	REACTOME_Pathways_25.05.2022	R-HSA:389960	Formation of tubulin folding intermediates by CCT/TriC	1.42129e-06	1.3335e-05	1.61784e-09	1.13249e-08	[-1]	Group20	24	6	[CCT6A, TUBA1A, TUBA1B, TUBA3C, TUBA3E, TUBB4B]
Hs 578T	secretome	REACTOME_Pathways_25.05.2022	R-HSA:9833482	PKR-mediated signaling	1.60993e-06	1.46734e-05	1.61784e-09	1.13249e-08	[-1]	Group20	12	9	[HSPA1A, HSPA2, NPM1, PPP2R1A, TUBA1A, TUBA1B, TUBA3C, TUBA3E, TUBB4B]
Hs 578T	secretome	REACTOME_Pathways_25.05.2022	R-HSA:9663891	Selective autophagy	3.09781e-06	2.29814e-05	1.61784e-09	1.13249e-08	[-1]	Group20	11.1111	9	[HSP90AA1, PLIN3, RPS27A, TUBA1A, TUBA1B, TUBA3C, TUBA3E, TUBB4B, UBE2N]
Hs 578T	secretome	REACTOME_Pathways_25.05.2022	R-HSA:8953854	Metabolism of RNA	0.000204629	0.000633755	3.43789e-07	9.02446e-07	[-1]	Group17	3.30579	24	[ALYREF, FUS, HNRNPA2B1, HNRNPK, HNRNPR, HSPA1A, HSPB1, PABPC1, PPP2R1A, PSMB1, PSMB3, PSMD9, RPL10A, RPL12, RPLP0, RPLP1, RPLP2, RPS12, RPS21, RPS27A, SARNP, SF3B4, SNRPD1, YWHAB]
Hs 578T	secretome	REACTOME_Pathways_25.05.2022	R-HSA:9619483	Activation of AMPK downstream of NMDARs	3.62808e-06	2.63036e-05	1.61784e-09	1.13249e-08	[-1]	Group20	20.6897	6	[CALM1, TUBA1A, TUBA1B, TUBA3C, TUBA3E, TUBB4B]
Hs 578T	secretome	REACTOME_Pathways_25.05.2022	R-HSA:190840	Microtubule-dependent trafficking of connexons from Golgi to the plasma membrane	5.12865e-06	3.33886e-05	1.61784e-09	1.13249e-08	[-1]	Group20	27.7778	5	[TUBA1A, TUBA1B, TUBA3C, TUBA3E, TUBB4B]
Hs 578T	secretome	REACTOME_Pathways_25.05.2022	R-HSA:5626467	RHO GTPases activate IQGAPs	6.66918e-06	4.09129e-05	1.61784e-09	1.13249e-08	[-1]	Group20	18.75	6	[CALM1, TUBA1A, TUBA1B, TUBA3C, TUBA3E, TUBB4B]
Hs 578T	secretome	REACTOME_Pathways_25.05.2022	R-HSA:8953854	Metabolism of RNA	0.000204629	0.000633755	9.81234e-11	1.0303e-09	[-1]	Group19	3.30579	24	[ALYREF, FUS, HNRNPA2B1, HNRNPK, HNRNPR, HSPA1A, HSPB1, PABPC1, PPP2R1A, PSMB1, PSMB3, PSMD9, RPL10A, RPL12, RPLP0, RPLP1, RPLP2, RPS12, RPS21, RPS27A, SARNP, SF3B4, SNRPD1, YWHAB]
Hs 578T	secretome	REACTOME_Pathways_25.05.2022	R-HSA:190872	Transport of connexons to the plasma membrane	6.87655e-06	4.13891e-05	1.61784e-09	1.13249e-08	[-1]	Group20	26.3158	5	[TUBA1A, TUBA1B, TUBA3C, TUBA3E, TUBB4B]
Hs 578T	secretome	REACTOME_Pathways_25.05.2022	R-HSA:195258	RHO GTPase Effectors	7.34132e-06	4.33682e-05	1.61784e-09	1.13249e-08	[-1]	Group20	5.21472	17	[ACTR3, CALM1, CTTN, MAPRE1, MYL12B, MYL6, NUDC, PPP2R1A, RHOC, TUBA1A, TUBA1B, TUBA3C, TUBA3E, TUBB4B, YWHAB, YWHAH, YWHAQ]
Hs 578T	secretome	REACTOME_Pathways_25.05.2022	R-HSA:69275	G2/M Transition	7.71043e-06	4.39219e-05	1.61784e-09	1.13249e-08	[-1]	Group20	6.59898	13	[DCTN2, HSP90AA1, MAPRE1, PPP2R1A, PSMB1, PSMB3, PSMD9, RPS27A, TUBA1A, TUBA1B, TUBA3C, TUBA3E, TUBB4B]
Hs 578T	secretome	REACTOME_Pathways_25.05.2022	R-HSA:9716542	Signaling by Rho GTPases, Miro GTPases and RHOBTB3	8.25153e-06	4.61796e-05	1.61784e-09	1.13249e-08	[-1]	Group20	3.73961	27	[ACTR3, ARHGDIA, CALM1, CCT6A, CTTN, EFHD2, HSP90AA1, HSPE1, MAPRE1, MYL12B, MYL6, NSFL1C, NUDC, PLIN3, PPP2R1A, RHOC, TMPO, TPM4, TUBA1A, TUBA1B, TUBA3C, TUBA3E, TUBB4B, TXNL1, YWHAB, YWHAH, YWHAQ]
Hs 578T	secretome	REACTOME_Pathways_25.05.2022	R-HSA:453274	Mitotic G2-G2/M phases	8.6043e-06	4.73236e-05	1.61784e-09	1.13249e-08	[-1]	Group20	6.53266	13	[DCTN2, HSP90AA1, MAPRE1, PPP2R1A, PSMB1, PSMB3, PSMD9, RPS27A, TUBA1A, TUBA1B, TUBA3C, TUBA3E, TUBB4B]
Hs 578T	secretome	REACTOME_Pathways_25.05.2022	R-HSA:380320	Recruitment of NuMA to mitotic centrosomes	1.07018e-05	5.68981e-05	1.61784e-09	1.13249e-08	[-1]	Group20	9.57447	9	[DCTN2, HSP90AA1, MAPRE1, PPP2R1A, TUBA1A, TUBA1B, TUBA3C, TUBA3E, TUBB4B]
Hs 578T	secretome	REACTOME_Pathways_25.05.2022	R-HSA:913531	Interferon Signaling	1.17861e-05	6.16357e-05	1.61784e-09	1.13249e-08	[-1]	Group20	5.57621	15	[B2M, HLA-A, HLA-B, HSPA1A, HSPA2, MT2A, NPM1, PPP2R1A, RPS27A, TUBA1A, TUBA1B, TUBA3C, TUBA3E, TUBB4B, UBE2N]
Hs 578T	secretome	REACTOME_Pathways_25.05.2022	R-HSA:1169410	Antiviral mechanism by IFN-stimulated genes	1.38327e-05	6.89476e-05	1.61784e-09	1.13249e-08	[-1]	Group20	7.38255	11	[HSPA1A, HSPA2, NPM1, PPP2R1A, RPS27A, TUBA1A, TUBA1B, TUBA3C, TUBA3E, TUBB4B, UBE2N]
Hs 578T	secretome	REACTOME_Pathways_25.05.2022	R-HSA:194315	Signaling by Rho GTPases	1.62517e-05	7.85497e-05	1.61784e-09	1.13249e-08	[-1]	Group20	3.68272	26	[ACTR3, ARHGDIA, CALM1, CCT6A, CTTN, EFHD2, HSP90AA1, HSPE1, MAPRE1, MYL12B, MYL6, NSFL1C, NUDC, PPP2R1A, RHOC, TMPO, TPM4, TUBA1A, TUBA1B, TUBA3C, TUBA3E, TUBB4B, TXNL1, YWHAB, YWHAH, YWHAQ]
Hs 578T	secretome	REACTOME_Pathways_25.05.2022	R-HSA:1280215	Cytokine Signaling in Immune system	1.85077e-05	8.68228e-05	1.61784e-09	1.13249e-08	[-1]	Group20	3.55781	28	[ANXA1, ANXA2, APP, B2M, CASP8, COL1A2, HLA-A, HLA-B, HNRNPA2B1, HSP90AA1, HSPA1A, HSPA2, MMP2, MT2A, NPM1, PPP2R1A, PSMB1, PSMB3, PSMD9, RPLP0, RPS27A, TIMP1, TUBA1A, TUBA1B, TUBA3C, TUBA3E, TUBB4B, UBE2N]
Hs 578T	secretome	REACTOME_Pathways_25.05.2022	R-HSA:450408	AUF1 (hnRNP D0) binds and destabilizes mRNA	1.83334e-05	8.72886e-05	1.61784e-09	1.13249e-08	[-1]	Group20	12.5	7	[HSPA1A, HSPB1, PABPC1, PSMB1, PSMB3, PSMD9, RPS27A]
Hs 578T	secretome	REACTOME_Pathways_25.05.2022	R-HSA:2262752	Cellular responses to stress	2.45121e-05	0.000110132	1.61784e-09	1.13249e-08	[-1]	Group20	3.47826	28	[CAPZA2, DCTN2, EEF1A1, HSP90AA1, HSPA1A, HSPA2, HSPA4, HSPA6, HSPH1, IGFBP7, PRDX6, PSMB1, PSMB3, PSMD9, RPL10A, RPL12, RPLP0, RPLP1, RPLP2, RPS12, RPS21, RPS27A, TUBA1A, TUBA1B, TUBA3C, TUBA3E, TUBB4B, TXN]
Hs 578T	secretome	REACTOME_Pathways_25.05.2022	R-HSA:2467813	Separation of Sister Chromatids	2.70328e-05	0.00011977	1.61784e-09	1.13249e-08	[-1]	Group20	6.31579	12	[MAPRE1, NUDC, PPP2R1A, PSMB1, PSMB3, PSMD9, RPS27A, TUBA1A, TUBA1B, TUBA3C, TUBA3E, TUBB4B]
Hs 578T	secretome	REACTOME_Pathways_25.05.2022	R-HSA:9609736	Assembly and cell surface presentation of NMDA receptors	2.96099e-05	0.000129391	1.61784e-09	1.13249e-08	[-1]	Group20	14.6341	6	[ACTN2, TUBA1A, TUBA1B, TUBA3C, TUBA3E, TUBB4B]
Hs 578T	secretome	REACTOME_Pathways_25.05.2022	R-HSA:450531	Regulation of mRNA stability by proteins that bind AU-rich elements	4.88194e-05	0.000202252	1.61784e-09	1.13249e-08	[-1]	Group20	9.09091	8	[HSPA1A, HSPB1, PABPC1, PSMB1, PSMB3, PSMD9, RPS27A, YWHAB]
Hs 578T	secretome	REACTOME_Pathways_25.05.2022	R-HSA:68882	Mitotic Anaphase	5.00195e-05	0.000204567	1.61784e-09	1.13249e-08	[-1]	Group20	5.53191	13	[MAPRE1, NUDC, PPP2R1A, PSMB1, PSMB3, PSMD9, RPS27A, TMPO, TUBA1A, TUBA1B, TUBA3C, TUBA3E, TUBB4B]
Hs 578T	secretome	REACTOME_Pathways_25.05.2022	R-HSA:2555396	Mitotic Metaphase and Anaphase	5.22577e-05	0.000205805	1.61784e-09	1.13249e-08	[-1]	Group20	5.50847	13	[MAPRE1, NUDC, PPP2R1A, PSMB1, PSMB3, PSMD9, RPS27A, TMPO, TUBA1A, TUBA1B, TUBA3C, TUBA3E, TUBB4B]
Hs 578T	secretome	REACTOME_Pathways_25.05.2022	R-HSA:389957	Prefoldin mediated transfer of substrate to CCT/TriC	5.21284e-05	0.000207862	1.61784e-09	1.13249e-08	[-1]	Group20	17.8571	5	[CCT6A, PFDN4, TUBA1A, TUBA3C, TUBB4B]
Hs 578T	secretome	REACTOME_Pathways_25.05.2022	R-HSA:190828	Gap junction trafficking	6.56664e-05	0.000252381	1.61784e-09	1.13249e-08	[-1]	Group20	12.766	6	[CLTB, TUBA1A, TUBA1B, TUBA3C, TUBA3E, TUBB4B]
Hs 578T	secretome	REACTOME_Pathways_25.05.2022	R-HSA:437239	Recycling pathway of L1	6.56664e-05	0.000252381	1.61784e-09	1.13249e-08	[-1]	Group20	12.766	6	[L1CAM, TUBA1A, TUBA1B, TUBA3C, TUBA3E, TUBB4B]
Hs 578T	secretome	REACTOME_Pathways_25.05.2022	R-HSA:373760	L1CAM interactions	7.07969e-05	0.00026886	1.61784e-09	1.13249e-08	[-1]	Group20	7.56302	9	[L1CAM, LAMB1, LAMC1, NRP1, TUBA1A, TUBA1B, TUBA3C, TUBA3E, TUBB4B]
Hs 578T	secretome	REACTOME_Pathways_25.05.2022	R-HSA:157858	Gap junction trafficking and regulation	8.34373e-05	0.000309494	1.61784e-09	1.13249e-08	[-1]	Group20	12.2449	6	[CLTB, TUBA1A, TUBA1B, TUBA3C, TUBA3E, TUBB4B]
Hs 578T	secretome	REACTOME_Pathways_25.05.2022	R-HSA:9668328	Sealing of the nuclear envelope (NE) by ESCRT-III	8.69174e-05	0.000315075	1.61784e-09	1.13249e-08	[-1]	Group20	16.129	5	[TUBA1A, TUBA1B, TUBA3C, TUBA3E, TUBB4B]
Hs 578T	secretome	REACTOME_Pathways_25.05.2022	R-HSA:199991	Membrane Trafficking	0.000238603	0.000731868	1.61784e-09	1.13249e-08	[-1]	Group20	3.47003	22	[ACTR3, APP, CALM1, CAPZA2, CLTB, CTTN, DCTN2, DNASE2, GALNT2, PAFAH1B3, PLIN3, RPS27A, TFG, TUBA1A, TUBA1B, TUBA3C, TUBA3E, TUBB4B, UBQLN1, YWHAB, YWHAH, YWHAQ]
Hs 578T	secretome	REACTOME_Pathways_25.05.2022	R-HSA:2132295	MHC class II antigen presentation	9.15464e-05	0.000324481	1.61784e-09	1.13249e-08	[-1]	Group20	7.31707	9	[CAPZA2, CTSD, CTSL, DCTN2, TUBA1A, TUBA1B, TUBA3C, TUBA3E, TUBB4B]
Hs 578T	secretome	REACTOME_Pathways_25.05.2022	R-HSA:391251	Protein folding	9.10385e-05	0.000326306	1.61784e-09	1.13249e-08	[-1]	Group20	8.33333	8	[CCT6A, PFDN4, TBCA, TUBA1A, TUBA1B, TUBA3C, TUBA3E, TUBB4B]
Hs 578T	secretome	REACTOME_Pathways_25.05.2022	R-HSA:2995410	Nuclear Envelope (NE) Reassembly	0.000123722	0.000428993	1.61784e-09	1.13249e-08	[-1]	Group20	9.33333	7	[PPP2R1A, TMPO, TUBA1A, TUBA1B, TUBA3C, TUBA3E, TUBB4B]
Hs 578T	secretome	REACTOME_Pathways_25.05.2022	R-HSA:8856688	Golgi-to-ER retrograde transport	0.000166724	0.00055401	1.61784e-09	1.13249e-08	[-1]	Group20	6.76692	9	[CAPZA2, DCTN2, GALNT2, PAFAH1B3, TUBA1A, TUBA1B, TUBA3C, TUBA3E, TUBB4B]
Hs 578T	secretome	REACTOME_Pathways_25.05.2022	R-HSA:1236975	Antigen processing-Cross presentation	0.000170887	0.000561988	1.61784e-09	1.13249e-08	[-1]	Group20	7.61905	8	[B2M, CTSL, HLA-A, HLA-B, PSMB1, PSMB3, PSMD9, RPS27A]
Hs 578T	secretome	REACTOME_Pathways_25.05.2022	R-HSA:190861	Gap junction assembly	0.000181569	0.000591026	1.61784e-09	1.13249e-08	[-1]	Group20	13.8889	5	[TUBA1A, TUBA1B, TUBA3C, TUBA3E, TUBB4B]
Hs 578T	secretome	REACTOME_Pathways_25.05.2022	R-HSA:438064	Post NMDA receptor activation events	0.000186037	0.000599454	1.61784e-09	1.13249e-08	[-1]	Group20	8.75	7	[ACTN2, CALM1, TUBA1A, TUBA1B, TUBA3C, TUBA3E, TUBB4B]
Hs 578T	secretome	REACTOME_Pathways_25.05.2022	R-HSA:1632852	Macroautophagy	0.000197402	0.000617365	1.61784e-09	1.13249e-08	[-1]	Group20	6.61765	9	[HSP90AA1, PLIN3, RPS27A, TUBA1A, TUBA1B, TUBA3C, TUBA3E, TUBB4B, UBE2N]
Hs 578T	secretome	REACTOME_Pathways_25.05.2022	R-HSA:71387	Metabolism of carbohydrates	0.00175332	0.00405297	0.00175332	0.00175332	[-1]	Group00	4.01338	12	[AKR1A1, B4GALT1, B4GAT1, CALM1, DCN, GAPDH, LUM, PGAM1, PGLS, PPP2R1A, RPS27A, TPI1]
Hs 578T	secretome	REACTOME_Pathways_25.05.2022	R-HSA:5663220	RHO GTPases Activate Formins	0.00024549	0.000745821	1.61784e-09	1.13249e-08	[-1]	Group20	6.42857	9	[MAPRE1, NUDC, PPP2R1A, RHOC, TUBA1A, TUBA1B, TUBA3C, TUBA3E, TUBB4B]
Hs 578T	secretome	REACTOME_Pathways_25.05.2022	R-HSA:9613829	Chaperone Mediated Autophagy	0.00028482	0.000841273	1.61784e-09	1.13249e-08	[-1]	Group20	18.1818	4	[EEF1A1, HSP90AA1, PLIN3, RPS27A]
Hs 578T	secretome	REACTOME_Pathways_25.05.2022	R-HSA:5610787	Hedgehog 'off' state	0.000283562	0.000845385	1.61784e-09	1.13249e-08	[-1]	Group20	7.07965	8	[PSMB1, PSMB3, PSMD9, RPS27A, TUBA1A, TUBA1B, TUBA3C, TUBB4B]
Hs 578T	secretome	REACTOME_Pathways_25.05.2022	R-HSA:2565942	Regulation of PLK1 Activity at G2/M Transition	0.000336484	0.000984756	1.61784e-09	1.13249e-08	[-1]	Group20	7.95455	7	[DCTN2, HSP90AA1, MAPRE1, PPP2R1A, RPS27A, TUBA1A, TUBB4B]
Hs 578T	secretome	REACTOME_Pathways_25.05.2022	R-HSA:9648025	EML4 and NUDC in mitotic spindle formation	0.000359324	0.00103265	1.61784e-09	1.13249e-08	[-1]	Group20	6.83761	8	[MAPRE1, NUDC, PPP2R1A, TUBA1A, TUBA1B, TUBA3C, TUBA3E, TUBB4B]
Hs 578T	secretome	REACTOME_Pathways_25.05.2022	R-HSA:8955332	Carboxyterminal post-translational modifications of tubulin	0.000381164	0.00107603	1.61784e-09	1.13249e-08	[-1]	Group20	11.9048	5	[TUBA1A, TUBA1B, TUBA3C, TUBA3E, TUBB4B]
Hs 578T	secretome	REACTOME_Pathways_25.05.2022	R-HSA:1236974	ER-Phagosome pathway	0.000386265	0.00108086	1.61784e-09	1.13249e-08	[-1]	Group20	7.77778	7	[B2M, HLA-A, HLA-B, PSMB1, PSMB3, PSMD9, RPS27A]
Hs 578T	secretome	REACTOME_Pathways_25.05.2022	R-HSA:390466	Chaperonin-mediated protein folding	0.000386265	0.00108086	1.61784e-09	1.13249e-08	[-1]	Group20	7.77778	7	[CCT6A, PFDN4, TUBA1A, TUBA1B, TUBA3C, TUBA3E, TUBB4B]
Hs 578T	secretome	REACTOME_Pathways_25.05.2022	R-HSA:442755	Activation of NMDA receptors and postsynaptic events	0.000471821	0.0012648	1.61784e-09	1.13249e-08	[-1]	Group20	7.52688	7	[ACTN2, CALM1, TUBA1A, TUBA1B, TUBA3C, TUBA3E, TUBB4B]
Hs 578T	secretome	REACTOME_Pathways_25.05.2022	R-HSA:2500257	Resolution of Sister Chromatid Cohesion	0.000590943	0.00157092	1.61784e-09	1.13249e-08	[-1]	Group20	6.34921	8	[MAPRE1, NUDC, PPP2R1A, TUBA1A, TUBA1B, TUBA3C, TUBA3E, TUBB4B]
Hs 578T	secretome	REACTOME_Pathways_25.05.2022	R-HSA:380259	Loss of Nlp from mitotic centrosomes	0.000604359	0.00159331	1.61784e-09	1.13249e-08	[-1]	Group20	8.57143	6	[DCTN2, HSP90AA1, MAPRE1, PPP2R1A, TUBA1A, TUBB4B]
Hs 578T	secretome	REACTOME_Pathways_25.05.2022	R-HSA:380284	Loss of proteins required for interphase microtubule organization from the centrosome	0.000604359	0.00159331	1.61784e-09	1.13249e-08	[-1]	Group20	8.57143	6	[DCTN2, HSP90AA1, MAPRE1, PPP2R1A, TUBA1A, TUBB4B]
Hs 578T	secretome	REACTOME_Pathways_25.05.2022	R-HSA:9755779	SARS-CoV-2 targets host intracellular signalling and regulatory pathways	0.000652444	0.00170598	1.61784e-09	1.13249e-08	[-1]	Group20	25	3	[YWHAB, YWHAH, YWHAQ]
Hs 578T	secretome	REACTOME_Pathways_25.05.2022	R-HSA:162909	Host Interactions of HIV factors	0.000726754	0.00188483	1.61784e-09	1.13249e-08	[-1]	Group20	6.15385	8	[B2M, HLA-A, NPM1, PSMB1, PSMB3, PSMD9, RANBP1, RPS27A]
Hs 578T	secretome	REACTOME_Pathways_25.05.2022	R-HSA:8854518	AURKA Activation by TPX2	0.000756322	0.0019457	1.61784e-09	1.13249e-08	[-1]	Group20	8.21918	6	[DCTN2, HSP90AA1, MAPRE1, PPP2R1A, TUBA1A, TUBB4B]
Hs 578T	secretome	REACTOME_Pathways_25.05.2022	R-HSA:5607764	CLEC7A (Dectin-1) signaling	0.000775459	0.00197897	1.61784e-09	1.13249e-08	[-1]	Group20	6.93069	7	[CALM1, CASP8, PSMB1, PSMB3, PSMD9, RPS27A, UBE2N]
Hs 578T	secretome	REACTOME_Pathways_25.05.2022	R-HSA:6807878	COPI-mediated anterograde transport	0.000775459	0.00197897	1.61784e-09	1.13249e-08	[-1]	Group20	6.93069	7	[CAPZA2, DCTN2, TUBA1A, TUBA1B, TUBA3C, TUBA3E, TUBB4B]
Hs 578T	secretome	REACTOME_Pathways_25.05.2022	R-HSA:75035	Chk1/Chk2(Cds1) mediated inactivation of Cyclin B:Cdk1 complex	0.000838901	0.00212388	1.61784e-09	1.13249e-08	[-1]	Group20	23.0769	3	[YWHAB, YWHAH, YWHAQ]
Hs 578T	secretome	REACTOME_Pathways_25.05.2022	R-HSA:1640170	Cell Cycle	0.000870213	0.00218581	1.61784e-09	1.13249e-08	[-1]	Group20	3.18379	22	[DCTN2, HSP90AA1, HSPA2, MAPRE1, NPM1, NUDC, PCNA, PPP2R1A, PSMB1, PSMB3, PSMD9, RPS27A, TMPO, TUBA1A, TUBA1B, TUBA3C, TUBA3E, TUBB4B, UBE2N, YWHAB, YWHAH, YWHAQ]
Hs 578T	secretome	REACTOME_Pathways_25.05.2022	R-HSA:6811442	Intra-Golgi and retrograde Golgi-to-ER traffic	0.000896493	0.00223423	1.61784e-09	1.13249e-08	[-1]	Group20	4.9505	10	[CAPZA2, DCTN2, GALNT2, PAFAH1B3, PLIN3, TUBA1A, TUBA1B, TUBA3C, TUBA3E, TUBB4B]
Hs 578T	secretome	REACTOME_Pathways_25.05.2022	R-HSA:68877	Mitotic Prometaphase	0.000966631	0.00239035	1.61784e-09	1.13249e-08	[-1]	Group20	4.90196	10	[DCTN2, HSP90AA1, MAPRE1, NUDC, PPP2R1A, TUBA1A, TUBA1B, TUBA3C, TUBA3E, TUBB4B]
Hs 578T	secretome	REACTOME_Pathways_25.05.2022	R-HSA:3371568	Attenuation phase	0.00105602	0.00257153	1.61784e-09	1.13249e-08	[-1]	Group20	21.4286	3	[HSP90AA1, HSPA1A, HSPA2]
Hs 578T	secretome	REACTOME_Pathways_25.05.2022	R-HSA:111447	Activation of BAD and translocation to mitochondria	0.00130561	0.00315522	1.61784e-09	1.13249e-08	[-1]	Group20	20	3	[YWHAB, YWHAH, YWHAQ]
Hs 578T	secretome	REACTOME_Pathways_25.05.2022	R-HSA:9735871	SARS-CoV-1 targets host intracellular signalling and regulatory pathways	0.00130561	0.00315522	1.61784e-09	1.13249e-08	[-1]	Group20	20	3	[YWHAB, YWHAH, YWHAQ]
Hs 578T	secretome	REACTOME_Pathways_25.05.2022	R-HSA:380270	Recruitment of mitotic centrosome proteins and complexes	0.00139347	0.00334223	1.61784e-09	1.13249e-08	[-1]	Group20	7.31707	6	[DCTN2, HSP90AA1, MAPRE1, PPP2R1A, TUBA1A, TUBB4B]
Hs 578T	secretome	REACTOME_Pathways_25.05.2022	R-HSA:380287	Centrosome maturation	0.00139347	0.00334223	1.61784e-09	1.13249e-08	[-1]	Group20	7.31707	6	[DCTN2, HSP90AA1, MAPRE1, PPP2R1A, TUBA1A, TUBB4B]
Hs 578T	secretome	REACTOME_Pathways_25.05.2022	R-HSA:68886	M Phase	0.00141027	0.00335729	1.61784e-09	1.13249e-08	[-1]	Group20	3.60577	15	[DCTN2, HSP90AA1, MAPRE1, NUDC, PPP2R1A, PSMB1, PSMB3, PSMD9, RPS27A, TMPO, TUBA1A, TUBA1B, TUBA3C, TUBA3E, TUBB4B]
Hs 578T	secretome	REACTOME_Pathways_25.05.2022	R-HSA:1280218	Adaptive Immune System	0.00161814	0.0037955	1.61784e-09	1.13249e-08	[-1]	Group20	2.99479	23	[B2M, CALM1, CAPZA2, COL1A1, COL1A2, COL3A1, CTSD, CTSL, DCTN2, HLA-A, HLA-B, PPP2R1A, PSMB1, PSMB3, PSMD9, RPS27A, TUBA1A, TUBA1B, TUBA3C, TUBA3E, TUBB4B, UBE2N, YWHAB]
Hs 578T	secretome	REACTOME_Pathways_25.05.2022	R-HSA:9020702	Interleukin-1 signaling	0.00166021	0.00386575	1.61784e-09	1.13249e-08	[-1]	Group20	6.08696	7	[APP, CASP8, PSMB1, PSMB3, PSMD9, RPS27A, UBE2N]
Hs 578T	secretome	REACTOME_Pathways_25.05.2022	R-HSA:5358351	Signaling by Hedgehog	0.00175458	0.00402671	1.61784e-09	1.13249e-08	[-1]	Group20	5.36913	8	[PSMB1, PSMB3, PSMD9, RPS27A, TUBA1A, TUBA1B, TUBA3C, TUBB4B]
Hs 578T	secretome	REACTOME_Pathways_25.05.2022	R-HSA:983189	Kinesins	0.0018296	0.0041393	1.61784e-09	1.13249e-08	[-1]	Group20	8.47458	5	[TUBA1A, TUBA1B, TUBA3C, TUBA3E, TUBB4B]
Hs 578T	secretome	REACTOME_Pathways_25.05.2022	R-HSA:948021	Transport to the Golgi and subsequent modification	0.00182051	0.00414815	1.61784e-09	1.13249e-08	[-1]	Group20	4.86486	9	[B4GALT1, CAPZA2, DCTN2, TFG, TUBA1A, TUBA1B, TUBA3C, TUBA3E, TUBB4B]
Hs 578T	secretome	REACTOME_Pathways_25.05.2022	R-HSA:199977	ER to Golgi Anterograde Transport	0.00215969	0.00478432	1.61784e-09	1.13249e-08	[-1]	Group20	5.19481	8	[CAPZA2, DCTN2, TFG, TUBA1A, TUBA1B, TUBA3C, TUBA3E, TUBB4B]
Hs 578T	secretome	GO_BiologicalProcess 25.05.2022	GO:0034097	response to cytokine	0.00110715	0.00486233	0.00110715	0.00110715	[4]	Group00	2.32313	22	[ACTR3, ANXA1, APP, CASP8, COL1A1, COL3A1, CXCL12, ECM1, EIF5A, GAPDH, HSPA1A, MAT2A, MMP2, MT2A, RAD23B, RPLP0, THBS1, TIMP1, TIMP2, TUBA1B, TXNDC17, ZYX]
Hs 578T	secretome	GO_BiologicalProcess 25.05.2022	GO:0043403	skeletal muscle tissue regeneration	0.00108707	0.00497948	0.00108707	0.00113433	[4, 5]	Group01	9.7561	4	[ANXA1, DAG1, MTPN, NACA]
Hs 578T	secretome	GO_BiologicalProcess 25.05.2022	GO:0030198	extracellular matrix organization	2.75358e-10	5.86514e-08	2.75358e-10	3.3043e-09	[5]	Group12	6.10465	21	[ANXA2, APP, B4GALT1, COL1A1, COL1A2, COL3A1, COL4A2, COL5A1, COL5A2, CST3, DAG1, LAMB1, LAMC1, LOXL2, LUM, MMP2, POSTN, QSOX1, SERPINH1, TGFB2, TGFBI]
Hs 578T	secretome	GO_BiologicalProcess 25.05.2022	GO:0005200	structural constituent of cytoskeleton	4.86378e-07	2.30219e-05	4.86378e-07	1.66758e-06	[6]	Group03	8.92857	10	[ACTR3, KRT31, KRT5, KRT9, PRPH, TUBA1A, TUBA1B, TUBA3C, TUBA3E, TUBB4B]
Hs 578T	secretome	GO_BiologicalProcess 25.05.2022	GO:1900122	positive regulation of receptor binding	0.000153231	0.00118684	0.000153231	0.000204307	[6]	Group04	30	3	[ANXA2, B2M, NRP1]
Hs 578T	secretome	GO_BiologicalProcess 25.05.2022	GO:0008380	RNA splicing	0.000232712	0.00157358	0.000232712	0.000279255	[6, 7, 8]	Group05	3.21888	15	[ALYREF, FUS, HNRNPA2B1, HNRNPK, HNRNPR, HSPA1A, NPM1, PABPC1, PPP2R1A, PRDX6, RBMXL1, RBMXL2, SF3B4, SFPQ, SNRPD1]
Hs 578T	secretome	GO_BiologicalProcess 25.05.2022	GO:0030198	extracellular matrix organization	2.75358e-10	5.86514e-08	2.37469e-08	1.89975e-07	[5]	Group17	6.10465	21	[ANXA2, APP, B4GALT1, COL1A1, COL1A2, COL3A1, COL4A2, COL5A1, COL5A2, CST3, DAG1, LAMB1, LAMC1, LOXL2, LUM, MMP2, POSTN, QSOX1, SERPINH1, TGFB2, TGFBI]
Hs 578T	secretome	GO_BiologicalProcess 25.05.2022	GO:0010755	regulation of plasminogen activation	0.000975794	0.004568	0.000975794	0.0010645	[7, 8, 9]	Group07	16.6667	3	[ANXA2, SERPINE1, THBS1]
Hs 578T	secretome	GO_BiologicalProcess 25.05.2022	GO:0098641	cadherin binding involved in cell-cell adhesion	4.01069e-05	0.000502516	2.16714e-05	4.00088e-05	[5]	Group08	22.2222	4	[ANXA1, ANXA2, PDLIM1, S100A11]
Hs 578T	secretome	GO_BiologicalProcess 25.05.2022	GO:0004859	phospholipase inhibitor activity	0.000557637	0.00316738	2.16714e-05	4.00088e-05	[7]	Group08	20	3	[ANXA1, ANXA2, ANXA5]
Hs 578T	secretome	GO_BiologicalProcess 25.05.2022	GO:0001667	ameboidal-type cell migration	0.000212152	0.00150628	0.00012331	0.000184965	[4]	Group09	3.24675	15	[ANXA1, CAP1, CLSTN1, CORO1C, DCN, FSTL1, HSPB1, LOXL2, NRP1, PDLIM1, SPARC, STC1, TGFB2, THBS1, TIMP1]
Hs 578T	secretome	GO_BiologicalProcess 25.05.2022	GO:0070482	response to oxygen levels	0.00060997	0.00337464	0.00012331	0.000184965	[3]	Group09	3.39943	12	[COL1A1, CXCL12, LOXL2, MMP2, PDLIM1, PLOD1, STC1, TGFB2, THBS1, TIMP1, UBQLN1, VASN]
Hs 578T	secretome	GO_BiologicalProcess 25.05.2022	GO:0001666	response to hypoxia	0.000703621	0.0036554	0.00012331	0.000184965	[3, 5]	Group09	3.55987	11	[CXCL12, LOXL2, MMP2, PDLIM1, PLOD1, STC1, TGFB2, THBS1, TIMP1, UBQLN1, VASN]
Hs 578T	secretome	GO_BiologicalProcess 25.05.2022	GO:0006165	nucleoside diphosphate phosphorylation	4.33604e-05	0.000513098	4.33604e-05	7.43321e-05	[6, 7, 8]	Group10	6.95652	8	[ACTN3, APP, EIF6, GAPDH, NME1, PGAM1, PGAM4, TPI1]
Hs 578T	secretome	GO_BiologicalProcess 25.05.2022	GO:0006096	glycolytic process	9.75302e-05	0.000883997	4.33604e-05	7.43321e-05	[5, 8, 9, 10, 11, 12]	Group10	7.29167	7	[ACTN3, APP, EIF6, GAPDH, PGAM1, PGAM4, TPI1]
Hs 578T	secretome	GO_BiologicalProcess 25.05.2022	GO:0006110	regulation of glycolytic process	0.000227746	0.00156484	4.33604e-05	7.43321e-05	[5, 6, 7, 8, 9, 10, 11, 12, 13]	Group10	10	5	[ACTN3, APP, EIF6, PGAM1, PGAM4]
Hs 578T	secretome	GO_BiologicalProcess 25.05.2022	GO:0019885	antigen processing and presentation of endogenous peptide antigen via MHC class I	0.000449783	0.00266121	0.000137411	0.000193992	[5]	Group11	21.4286	3	[B2M, HLA-A, HLA-B]
Hs 578T	secretome	GO_BiologicalProcess 25.05.2022	GO:0002504	antigen processing and presentation of peptide or polysaccharide antigen via MHC class II	0.00073392	0.00376687	0.000137411	0.000193992	[3]	Group11	10.8108	4	[B2M, CTSD, CTSL, THBS1]
Hs 578T	secretome	GO_BiologicalProcess 25.05.2022	GO:0048002	antigen processing and presentation of peptide antigen	0.00101888	0.00471784	0.000137411	0.000193992	[3]	Group11	7.24638	5	[B2M, CTSD, CTSL, HLA-A, HLA-B]
Hs 578T	secretome	GO_BiologicalProcess 25.05.2022	GO:0030198	extracellular matrix organization	2.75358e-10	5.86514e-08	5.9869e-06	1.43686e-05	[5]	Group18	6.10465	21	[ANXA2, APP, B4GALT1, COL1A1, COL1A2, COL3A1, COL4A2, COL5A1, COL5A2, CST3, DAG1, LAMB1, LAMC1, LOXL2, LUM, MMP2, POSTN, QSOX1, SERPINH1, TGFB2, TGFBI]
Hs 578T	secretome	GO_BiologicalProcess 25.05.2022	GO:0085029	extracellular matrix assembly	2.07733e-05	0.000353976	2.75358e-10	3.3043e-09	[5, 6]	Group12	11.7647	6	[COL1A2, COL3A1, DAG1, LAMB1, LAMC1, QSOX1]
Hs 578T	secretome	GO_BiologicalProcess 25.05.2022	GO:0071711	basement membrane organization	0.00089832	0.00439867	2.75358e-10	3.3043e-09	[6]	Group12	10.2564	4	[COL3A1, DAG1, LAMB1, LAMC1]
Hs 578T	secretome	GO_BiologicalProcess 25.05.2022	GO:0051130	positive regulation of cellular component organization	8.04613e-06	0.000190425	9.94194e-06	1.98839e-05	[3, 4, 5]	Group13	2.71248	30	[ACTN2, ACTR3, ANXA1, ANXA2, APP, B2M, CCT6A, CFL2, CLSTN1, CORO1C, CTTN, CXCL12, DAG1, DCN, EIF5A, HNRNPA2B1, HNRNPK, HSP90AA1, HSPA1A, L1CAM, MAPRE1, NRP1, PDCD5, RHOC, SERPINE1, SFPQ, TGFB2, THBS2, TIMP1, WDR1]
Hs 578T	secretome	GO_BiologicalProcess 25.05.2022	GO:0016477	cell migration	4.15719e-05	0.000505989	9.94194e-06	1.98839e-05	[3]	Group13	2.26558	36	[ANXA1, APP, B4GALT1, CAP1, CLSTN1, COL1A1, COL3A1, COL5A1, CORO1C, CTTN, CXCL12, DAG1, DCN, ECM1, FSTL1, HSP90AA1, HSPB1, ITGBL1, KRT5, L1CAM, LAMB1, LAMC1, LOXL2, MAPRE1, MMP2, NRP1, PDLIM1, RHOC, S100A11, SERPINE1, SPARC, STC1, TGFB2, THBS1, TIMP1, WDR1]
Hs 578T	secretome	GO_BiologicalProcess 25.05.2022	GO:1902905	positive regulation of supramolecular fiber organization	0.000212868	0.00148659	9.94194e-06	1.98839e-05	[4, 5, 6]	Group13	4.91803	9	[ACTN2, APP, CFL2, CTTN, HSPA1A, MAPRE1, NRP1, RHOC, WDR1]
Hs 578T	secretome	GO_BiologicalProcess 25.05.2022	GO:0010638	positive regulation of organelle organization	0.000920909	0.00440795	9.94194e-06	1.98839e-05	[4, 5, 6]	Group13	2.81955	15	[ACTN2, ANXA1, ANXA2, CCT6A, CFL2, CTTN, DCN, HNRNPA2B1, HSPA1A, MAPRE1, NRP1, PDCD5, RHOC, SFPQ, WDR1]
Hs 578T	secretome	GO_BiologicalProcess 25.05.2022	GO:0031589	cell-substrate adhesion	7.12867e-06	0.000178636	7.8492e-07	2.35476e-06	[3]	Group14	4.13437	16	[ACTN2, ACTN3, COL1A1, COL3A1, CORO1C, CTTN, DAG1, ITGBL1, L1CAM, LAMB1, LAMC1, NRP1, RSU1, SERPINE1, THBS1, ZYX]
Hs 578T	secretome	GO_BiologicalProcess 25.05.2022	GO:0007160	cell-matrix adhesion	2.42228e-05	0.000382182	7.8492e-07	2.35476e-06	[4]	Group14	4.8	12	[ACTN2, ACTN3, COL3A1, CORO1C, CTTN, DAG1, ITGBL1, L1CAM, NRP1, SERPINE1, THBS1, ZYX]
Hs 578T	secretome	GO_BiologicalProcess 25.05.2022	GO:0030198	extracellular matrix organization	2.75358e-10	5.86514e-08	3.66178e-08	2.19707e-07	[5]	Group23	6.10465	21	[ANXA2, APP, B4GALT1, COL1A1, COL1A2, COL3A1, COL4A2, COL5A1, COL5A2, CST3, DAG1, LAMB1, LAMC1, LOXL2, LUM, MMP2, POSTN, QSOX1, SERPINH1, TGFB2, TGFBI]
Hs 578T	secretome	GO_BiologicalProcess 25.05.2022	GO:0007044	cell-substrate junction assembly	0.000181643	0.00133414	7.8492e-07	2.35476e-06	[6]	Group14	6.60377	7	[ACTN2, ACTN3, CORO1C, CTTN, LAMC1, NRP1, THBS1]
Hs 578T	secretome	GO_BiologicalProcess 25.05.2022	GO:0042981	regulation of apoptotic process	6.03127e-05	0.000626664	0.000455375	0.000520428	[5, 6]	Group15	2.25515	35	[ACTN2, ACTN3, ANXA1, ANXA5, ARHGDIA, B4GALT1, CASP8, CLSTN1, CTSD, CTTN, CXCL12, EIF5A, FSTL1, HNRNPK, HSP90AA1, HSPA1A, HSPB1, HSPD1, LGALS1, MMP2, NACA, NME1, NPM1, NRP1, PA2G4, PDCD5, PPP2R1A, PTMA, SERPINE1, SFPQ, TGFB2, THBS1, TIMP1, UBQLN1, UFM1]
Hs 578T	secretome	GO_BiologicalProcess 25.05.2022	GO:0006915	apoptotic process	0.00017045	0.00129664	0.000455375	0.000520428	[4]	Group15	2.01573	41	[ACTN2, ACTN3, ANXA1, ANXA5, APP, ARHGDIA, B4GALT1, CASP8, CLSTN1, CTSD, CTSL, CTTN, CXCL12, DNASE2, EIF5A, FSTL1, GAPDH, HNRNPK, HSP90AA1, HSPA1A, HSPB1, HSPD1, HSPE1, LGALS1, MARCKS, MMP2, NACA, NME1, NPM1, NRP1, PA2G4, PDCD5, PPP2R1A, PTMA, SERPINE1, SFPQ, TGFB2, THBS1, TIMP1, UBQLN1, UFM1]
Hs 578T	secretome	GO_BiologicalProcess 25.05.2022	GO:0007010	cytoskeleton organization	5.06927e-08	3.59918e-06	4.89009e-18	1.17362e-16	[5]	Group22	2.67746	43	[ACTN2, ACTN3, ACTR3, ANXA1, ARHGDIA, CAP1, CAPZA2, CFL2, CORO1C, CSRP1, CTTN, CXCL12, DAG1, DCTN2, GAPDH, HSPA1A, KRT31, KRT5, KRT76, KRT9, MAP4, MAPRE1, MARCKS, MTPN, NPM1, NRP1, NSFL1C, NUDC, PDLIM1, PPP2R1A, PRPH, RANBP1, RHOC, STMN1, TPM2, TPM4, TUBA1A, TUBA1B, TUBA3C, TUBA3E, TUBB4B, WDR1, ZYX]
Hs 578T	secretome	GO_BiologicalProcess 25.05.2022	GO:2001233	regulation of apoptotic signaling pathway	0.0005681	0.00318435	0.000455375	0.000520428	[4, 5, 6, 7]	Group15	3.2419	13	[CTTN, CXCL12, EIF5A, HNRNPK, HSPA1A, HSPB1, NRP1, PPP2R1A, SERPINE1, SFPQ, THBS1, TIMP1, UBQLN1]
Hs 578T	secretome	GO_BiologicalProcess 25.05.2022	GO:2001242	regulation of intrinsic apoptotic signaling pathway	0.000961411	0.00455068	0.000455375	0.000520428	[5, 6, 7, 8]	Group15	4.41989	8	[CXCL12, EIF5A, HNRNPK, HSPA1A, HSPB1, SFPQ, TIMP1, UBQLN1]
Hs 578T	secretome	GO_BiologicalProcess 25.05.2022	GO:0031589	cell-substrate adhesion	7.12867e-06	0.000178636	1.97926e-07	7.91703e-07	[3]	Group16	4.13437	16	[ACTN2, ACTN3, COL1A1, COL3A1, CORO1C, CTTN, DAG1, ITGBL1, L1CAM, LAMB1, LAMC1, NRP1, RSU1, SERPINE1, THBS1, ZYX]
Hs 578T	secretome	GO_BiologicalProcess 25.05.2022	GO:0009611	response to wounding	1.98028e-05	0.0003515	1.97926e-07	7.91703e-07	[3]	Group16	3.23102	20	[ANXA1, ANXA2, ANXA5, B4GALT1, CLIC1, COL1A1, COL3A1, COL5A1, CSRP1, DAG1, HSPB1, LAMC1, MMP2, NACA, NRP1, RHOC, SERPINE1, TGFB2, THBS1, TIMP1]
Hs 578T	secretome	GO_BiologicalProcess 25.05.2022	GO:0010033	response to organic substance	1.86458e-07	9.92888e-06	1.86458e-07	8.94997e-07	[3]	Group06	2.06832	66	[ACTN2, ACTR3, AKR1A1, ANXA1, ANXA5, APP, B2M, CASP8, CLSTN1, COL1A1, COL1A2, COL3A1, COL4A2, COL5A2, COL6A1, COL6A2, CTSL, CXCL12, DAG1, DCN, DKK3, ECM1, EEF1A1, EIF5A, EIF6, FSTL1, GAPDH, HSP90AA1, HSPA1A, HSPA2, HSPA4, HSPA6, HSPB1, HSPD1, HSPE1, HSPH1, IGFBP7, MAT2A, MMP2, MT2A, NPM1, NRP1, NUDC, PCNA, PDCD5, POSTN, PPP2R1A, RAD23B, RPL10A, RPLP0, SERPINE1, SERPINH1, SGTA, SRI, STC1, TGFB2, T…
Hs 578T	secretome	GO_BiologicalProcess 25.05.2022	GO:0045595	regulation of cell differentiation	0.00010876	0.000926638	0.00010876	0.000174017	[3, 4]	Group02	2.15957	36	[ACTN3, ANXA1, ANXA2, APP, B2M, CASP8, CLIC1, COL1A1, COL5A1, COL5A2, CORO1C, CSRP1, CXCL12, DAG1, EFEMP1, EIF6, FNDC5, HLA-B, HSPA1A, L1CAM, LAMB1, LAMC1, LGALS1, LOXL2, NACA, NAP1L1, NRP1, PA2G4, PPP2R1A, SERPINE1, TGFB2, TIMP1, VASN, WDR1, XRCC6, YWHAH]
Hs 578T	secretome	GO_BiologicalProcess 25.05.2022	GO:2000147	positive regulation of cell motility	0.000909542	0.00440301	1.97926e-07	7.91703e-07	[3, 4, 5]	Group16	2.72109	16	[ANXA1, APP, CLSTN1, COL1A1, CXCL12, HSPB1, LAMB1, MMP2, NRP1, PGAM4, RHOC, S100A11, SERPINE1, SPARC, TGFB2, THBS1]
Hs 578T	secretome	GO_BiologicalProcess 25.05.2022	GO:0030155	regulation of cell adhesion	0.000126323	0.00105517	7.8492e-07	2.35476e-06	[3, 4]	Group14	2.6764	22	[ANXA1, ARHGDIA, B2M, COL1A1, CORO1C, CXCL12, DAG1, HLA-A, HSPD1, HSPH1, LAMB1, LAMC1, LGALS1, MMP2, NRP1, PPP2R1A, RSU1, SERPINE1, TGFB2, TGFBI, THBS1, TIMP1]
Hs 578T	secretome	GO_BiologicalProcess 25.05.2022	GO:0030199	collagen fibril organization	2.82324e-09	2.4054e-07	2.37469e-08	1.89975e-07	[5, 6]	Group17	15.1515	10	[ANXA2, COL1A1, COL1A2, COL3A1, COL5A1, COL5A2, LOXL2, LUM, SERPINH1, TGFB2]
Hs 578T	secretome	GO_BiologicalProcess 25.05.2022	GO:0035987	endodermal cell differentiation	2.59967e-05	0.000381882	2.37469e-08	1.89975e-07	[4, 5, 6, 7, 8, 9]	Group17	11.3208	6	[COL4A2, COL5A1, COL5A2, COL6A1, LAMB1, MMP2]
Hs 578T	secretome	GO_BiologicalProcess 25.05.2022	GO:0007492	endoderm development	7.44133e-05	0.000720456	2.37469e-08	1.89975e-07	[4]	Group17	7.6087	7	[COL4A2, COL5A1, COL5A2, COL6A1, LAMB1, LAMC1, MMP2]
Hs 578T	secretome	GO_BiologicalProcess 25.05.2022	GO:0043200	response to amino acid	0.00045186	0.00263688	2.37469e-08	1.89975e-07	[4, 5]	Group17	5.69106	7	[COL1A1, COL1A2, COL3A1, COL5A2, COL6A1, MMP2, PCNA]
Hs 578T	secretome	GO_BiologicalProcess 25.05.2022	GO:0030155	regulation of cell adhesion	0.000126323	0.00105517	1.97926e-07	7.91703e-07	[3, 4]	Group16	2.6764	22	[ANXA1, ARHGDIA, B2M, COL1A1, CORO1C, CXCL12, DAG1, HLA-A, HSPD1, HSPH1, LAMB1, LAMC1, LGALS1, MMP2, NRP1, PPP2R1A, RSU1, SERPINE1, TGFB2, TGFBI, THBS1, TIMP1]
Hs 578T	secretome	GO_BiologicalProcess 25.05.2022	GO:0030199	collagen fibril organization	2.82324e-09	2.4054e-07	5.9869e-06	1.43686e-05	[5, 6]	Group18	15.1515	10	[ANXA2, COL1A1, COL1A2, COL3A1, COL5A1, COL5A2, LOXL2, LUM, SERPINH1, TGFB2]
Hs 578T	secretome	GO_BiologicalProcess 25.05.2022	GO:0001568	blood vessel development	1.06411e-05	0.000215863	5.9869e-06	1.43686e-05	[3, 5, 6, 7]	Group18	3.06667	23	[ANXA1, ANXA2, B4GALT1, CASP8, CLSTN1, COL1A1, COL1A2, COL3A1, COL4A2, COL5A1, DAG1, DCN, ECM1, HSPB1, LOXL2, MMP2, NRP1, SERPINE1, SPARC, TGFB2, TGFBI, THBS1, THBS2]
Hs 578T	secretome	GO_BiologicalProcess 25.05.2022	GO:0085029	extracellular matrix assembly	2.07733e-05	0.000353976	5.9869e-06	1.43686e-05	[5, 6]	Group18	11.7647	6	[COL1A2, COL3A1, DAG1, LAMB1, LAMC1, QSOX1]
Hs 578T	secretome	GO_BiologicalProcess 25.05.2022	GO:0048646	anatomical structure formation involved in morphogenesis	5.56939e-05	0.00059314	5.9869e-06	1.43686e-05	[2, 3, 4]	Group18	2.41741	30	[ACTN2, ANXA1, ANXA2, B4GALT1, CASP8, CFL2, CLSTN1, COL1A1, COL3A1, COL4A2, COL5A1, COL5A2, COL6A1, CSRP1, DAG1, DCN, ECM1, HSPB1, LAMB1, LOXL2, MMP2, MTPN, NRP1, SERPINE1, SPARC, TGFB2, TGFBI, THBS1, THBS2, WDR1]
Hs 578T	secretome	GO_BiologicalProcess 25.05.2022	GO:0072359	circulatory system development	0.000144885	0.00114298	5.9869e-06	1.43686e-05	[4, 5]	Group18	2.36088	28	[ACTN2, ANXA1, ANXA2, B4GALT1, CASP8, CLSTN1, COL1A1, COL1A2, COL3A1, COL4A2, COL5A1, DAG1, DCN, ECM1, HSPB1, LOXL2, MMP2, NACA, NRP1, PCNA, PDLIM1, SERPINE1, SPARC, SRI, TGFB2, TGFBI, THBS1, THBS2]
Hs 578T	secretome	GO_BiologicalProcess 25.05.2022	GO:0044183	protein folding chaperone	3.59487e-10	5.10472e-08	9.2092e-06	2.00928e-05	[3]	Group19	18.5185	10	[CCT6A, HSP90AA1, HSPA1A, HSPA2, HSPA4, HSPA6, HSPB1, HSPD1, HSPE1, HSPH1]
Hs 578T	secretome	GO_BiologicalProcess 25.05.2022	GO:0140662	ATP-dependent protein folding chaperone	1.2831e-09	1.3665e-07	9.2092e-06	2.00928e-05	[4]	Group19	25.8065	8	[CCT6A, HSPA1A, HSPA2, HSPA4, HSPA6, HSPD1, HSPE1, HSPH1]
Hs 578T	secretome	GO_BiologicalProcess 25.05.2022	GO:0006986	response to unfolded protein	5.44996e-07	2.32168e-05	9.2092e-06	2.00928e-05	[4, 5]	Group19	7.74648	11	[HSP90AA1, HSPA1A, HSPA2, HSPA4, HSPA6, HSPB1, HSPD1, HSPE1, HSPH1, SERPINH1, THBS1]
Hs 578T	secretome	GO_BiologicalProcess 25.05.2022	GO:0061077	chaperone-mediated protein folding	1.99976e-06	6.08499e-05	9.2092e-06	2.00928e-05	[3]	Group19	10.5263	8	[CCT6A, HSPA1A, HSPA2, HSPA6, HSPB1, HSPE1, HSPH1, PDCD5]
Hs 578T	secretome	GO_BiologicalProcess 25.05.2022	GO:0006458	'de novo' protein folding	5.688e-06	0.000151443	9.2092e-06	2.00928e-05	[3]	Group19	14.6341	6	[HSPA1A, HSPA2, HSPA6, HSPD1, HSPE1, HSPH1]
Hs 578T	secretome	GO_BiologicalProcess 25.05.2022	GO:0051085	chaperone cofactor-dependent protein refolding	2.5454e-05	0.000387264	9.2092e-06	2.00928e-05	[4, 5]	Group19	15.625	5	[HSPA1A, HSPA2, HSPA6, HSPE1, HSPH1]
Hs 578T	secretome	GO_BiologicalProcess 25.05.2022	GO:0009408	response to heat	8.29809e-05	0.000768475	9.2092e-06	2.00928e-05	[3, 4]	Group19	6.34921	8	[CXCL12, HSP90AA1, HSPA1A, HSPA2, HSPA6, HSPB1, IGFBP7, THBS1]
Hs 578T	secretome	GO_BiologicalProcess 25.05.2022	GO:0009266	response to temperature stimulus	9.77382e-05	0.000867426	9.2092e-06	2.00928e-05	[3]	Group19	4.90196	10	[CASP8, CXCL12, HSP90AA1, HSPA1A, HSPA2, HSPA6, HSPB1, HSPD1, IGFBP7, THBS1]
Hs 578T	secretome	GO_BiologicalProcess 25.05.2022	GO:0006412	translation	1.44586e-07	8.79909e-06	0.000188985	0.000238718	[4, 5, 6, 7]	Group20	3.58127	26	[APP, EEF1A1, EEF1B2, EEF1D, EEF1G, EIF3J, EIF5A, EIF6, GAPDH, HSPB1, MTPN, NACA, NPM1, PA2G4, PABPC1, RPL10A, RPL12, RPLP0, RPLP1, RPLP2, RPS12, RPS21, RPS27A, SARNP, SRP9, THBS1]
Hs 578T	secretome	GO_BiologicalProcess 25.05.2022	GO:0006414	translational elongation	5.94201e-07	2.30118e-05	0.000188985	0.000238718	[5, 6, 7, 8]	Group20	12.3077	8	[EEF1A1, EEF1B2, EEF1D, EEF1G, EIF5A, RPLP1, RPLP2, SRP9]
Hs 578T	secretome	GO_BiologicalProcess 25.05.2022	GO:0006518	peptide metabolic process	1.88438e-06	6.17498e-05	0.000188985	0.000238718	[4, 5]	Group20	2.97872	28	[APP, CLIC1, CTSL, EEF1A1, EEF1B2, EEF1D, EEF1G, EIF3J, EIF5A, EIF6, GAPDH, HSPB1, MTPN, NACA, NPM1, PA2G4, PABPC1, RPL10A, RPL12, RPLP0, RPLP1, RPLP2, RPS12, RPS21, RPS27A, SARNP, SRP9, THBS1]
Hs 578T	secretome	GO_BiologicalProcess 25.05.2022	GO:0002181	cytoplasmic translation	4.26177e-06	0.000121034	0.000188985	0.000238718	[5, 6, 7, 8]	Group20	6.28571	11	[EIF3J, EIF6, PABPC1, RPL10A, RPL12, RPLP0, RPLP1, RPLP2, RPS12, RPS21, RPS27A]
Hs 578T	secretome	GO_BiologicalProcess 25.05.2022	GO:0003746	translation elongation factor activity	8.77741e-06	0.000196799	0.000188985	0.000238718	[6, 7, 8, 9, 10, 11, 12]	Group20	19.2308	5	[EEF1A1, EEF1B2, EEF1D, EEF1G, EIF5A]
Hs 578T	secretome	GO_BiologicalProcess 25.05.2022	GO:0034248	regulation of cellular amide metabolic process	1.07178e-05	0.000207536	0.000188985	0.000238718	[4, 5]	Group20	3.49908	19	[APP, EEF1A1, EEF1B2, EEF1D, EEF1G, EIF3J, EIF5A, EIF6, GAPDH, HSPB1, MTPN, NPM1, PA2G4, PABPC1, PGAM1, PGAM4, SARNP, SRP9, THBS1]
Hs 578T	secretome	GO_BiologicalProcess 25.05.2022	GO:0034645	cellular macromolecule biosynthetic process	1.1264e-05	0.000208628	0.000188985	0.000238718	[4, 5]	Group20	2.57048	31	[APP, B4GALT1, B4GAT1, EEF1A1, EEF1B2, EEF1D, EEF1G, EIF3J, EIF5A, EIF6, GALNT2, GAPDH, HSPB1, MTPN, NACA, NPM1, PA2G4, PABPC1, PLOD1, RPL10A, RPL12, RPLP0, RPLP1, RPLP2, RPS12, RPS21, RPS27A, SARNP, SRP9, THBS1, TIMP1]
Hs 578T	secretome	GO_BiologicalProcess 25.05.2022	GO:0043603	cellular amide metabolic process	2.68613e-05	0.000381431	0.000188985	0.000238718	[4]	Group20	2.50404	31	[APP, CLIC1, CTSL, EEF1A1, EEF1B2, EEF1D, EEF1G, EIF3J, EIF5A, EIF6, GAPDH, HSPB1, MTPN, NACA, NPM1, PA2G4, PABPC1, PGAM1, PGAM4, PPP2R1A, RPL10A, RPL12, RPLP0, RPLP1, RPLP2, RPS12, RPS21, RPS27A, SARNP, SRP9, THBS1]
Hs 578T	secretome	GO_BiologicalProcess 25.05.2022	GO:0090079	translation regulator activity, nucleic acid binding	4.33604e-05	0.000513098	0.000188985	0.000238718	[7, 8, 9, 10]	Group20	6.95652	8	[EEF1A1, EEF1B2, EEF1D, EEF1G, EIF3J, EIF5A, EIF6, PABPC1]
Hs 578T	secretome	GO_BiologicalProcess 25.05.2022	GO:0010608	post-transcriptional regulation of gene expression	0.000128405	0.00103209	0.000188985	0.000238718	[5, 6]	Group20	3.01003	18	[APP, EEF1A1, EEF1B2, EEF1D, EEF1G, EIF3J, EIF5A, EIF6, FUS, GAPDH, HSPB1, MTPN, NPM1, PA2G4, PABPC1, SARNP, SRP9, THBS1]
Hs 578T	secretome	GO_BiologicalProcess 25.05.2022	GO:0052547	regulation of peptidase activity	9.34497e-06	0.000199048	1.33658e-06	3.56422e-06	[5, 6, 7]	Group21	3.68098	18	[ANXA2, APP, CASP8, CST3, CSTB, CTSD, ECM1, GAPDH, HSPD1, HSPE1, PCOLCE, PDCD5, SERPINB6, SERPINE1, SERPINH1, THBS1, TIMP1, TIMP2]
Hs 578T	secretome	GO_BiologicalProcess 25.05.2022	GO:0004857	enzyme inhibitor activity	2.92454e-05	0.00038933	1.33658e-06	3.56422e-06	[5]	Group21	3.68664	16	[ANXA1, ANXA2, ANXA5, APP, CST3, CSTB, GAPDH, HSPB1, NPM1, PPP1R14B, SERPINB6, SERPINE1, SERPINH1, TIMP1, TIMP2, YWHAB]
Hs 578T	secretome	GO_BiologicalProcess 25.05.2022	GO:0051336	regulation of hydrolase activity	3.22446e-05	0.000416248	1.33658e-06	3.56422e-06	[4]	Group21	2.57353	28	[ANXA1, ANXA2, APP, CALM1, CASP8, CORO1C, CST3, CSTB, CTSD, ECM1, GAPDH, HSPA1A, HSPD1, HSPE1, NPM1, PCNA, PCOLCE, PDCD5, RHOC, RSU1, SERPINB6, SERPINE1, SERPINH1, STMN1, TGFB2, THBS1, TIMP1, TIMP2]
Hs 578T	secretome	GO_BiologicalProcess 25.05.2022	GO:0052548	regulation of endopeptidase activity	4.88388e-05	0.000562307	1.33658e-06	3.56422e-06	[6, 7, 8]	Group21	3.53201	16	[ANXA2, APP, CASP8, CST3, CSTB, CTSD, GAPDH, HSPD1, HSPE1, PDCD5, SERPINB6, SERPINE1, SERPINH1, THBS1, TIMP1, TIMP2]
Hs 578T	secretome	GO_BiologicalProcess 25.05.2022	GO:0030162	regulation of proteolysis	7.1155e-05	0.000704931	1.33658e-06	3.56422e-06	[5, 6]	Group21	2.78481	22	[ANXA2, APP, CASP8, CST3, CSTB, CTSD, ECM1, GAPDH, HSPA1A, HSPD1, HSPE1, PCOLCE, PDCD5, RAD23B, SERPINB6, SERPINE1, SERPINH1, SGTA, THBS1, TIMP1, TIMP2, UBQLN1]
Hs 578T	secretome	GO_BiologicalProcess 25.05.2022	GO:0044093	positive regulation of molecular function	7.77584e-05	0.000736113	1.33658e-06	3.56422e-06	[3]	Group21	2.16628	37	[ACTN2, ANXA2, APP, B2M, CALM1, CAP1, CASP8, CORO1C, CTSD, DAG1, DNAJC9, HNRNPA2B1, HNRNPK, HSP90AA1, HSPA1A, HSPA2, HSPD1, HSPE1, MAPRE1, MTPN, NME1, NPM1, NRP1, PCNA, PCOLCE, PDCD5, RHOC, RPLP1, RSU1, STMN1, TGFB2, THBS1, TIMP1, TXN, UBE2N, XRCC6, YWHAB]
Hs 578T	secretome	GO_BiologicalProcess 25.05.2022	GO:0061134	peptidase regulator activity	0.000100086	0.000870138	1.33658e-06	3.56422e-06	[5, 6, 7, 8]	Group21	4.47154	11	[ANXA2, APP, CST3, CSTB, GAPDH, PCOLCE, SERPINB6, SERPINE1, SERPINH1, TIMP1, TIMP2]
Hs 578T	secretome	GO_BiologicalProcess 25.05.2022	GO:0051346	negative regulation of hydrolase activity	0.000126469	0.00103607	1.33658e-06	3.56422e-06	[5]	Group21	3.58056	14	[ANXA1, ANXA2, APP, CST3, CSTB, ECM1, GAPDH, SERPINB6, SERPINE1, SERPINH1, TGFB2, THBS1, TIMP1, TIMP2]
Hs 578T	secretome	GO_BiologicalProcess 25.05.2022	GO:0045861	negative regulation of proteolysis	0.000251323	0.00164713	1.33658e-06	3.56422e-06	[5, 6, 7]	Group21	3.53261	13	[ANXA2, APP, CST3, CSTB, ECM1, GAPDH, SERPINB6, SERPINE1, SERPINH1, SGTA, THBS1, TIMP1, TIMP2]
Hs 578T	secretome	GO_BiologicalProcess 25.05.2022	GO:0030234	enzyme regulator activity	0.00038634	0.00235115	1.33658e-06	3.56422e-06	[4]	Group21	2.185	30	[ANXA1, ANXA2, ANXA5, APP, ARHGDIA, CALM1, CST3, CSTB, EEF1B2, EEF1D, GAPDH, HSP90AA1, HSPB1, NPM1, NRP1, NUCB2, PCNA, PCOLCE, PDCD5, PPP1R14B, PPP2R1A, RANBP1, RPLP1, SERPINB6, SERPINE1, SERPINH1, STMN1, TIMP1, TIMP2, YWHAB]
Hs 578T	secretome	GO_BiologicalProcess 25.05.2022	GO:0044092	negative regulation of molecular function	0.000614567	0.00335648	1.33658e-06	3.56422e-06	[3]	Group21	2.19691	27	[ACTN2, ANXA1, ANXA2, ANXA5, APP, B2M, CALM1, CORO1C, CST3, CSTB, DKK3, ECM1, GAPDH, HSPB1, NPM1, PPP1R14B, SERPINB6, SERPINE1, SERPINH1, SRI, STMN1, TGFB2, THBS1, TIMP1, TIMP2, UBQLN1, YWHAB]
Hs 578T	secretome	GO_BiologicalProcess 25.05.2022	GO:0051248	negative regulation of protein metabolic process	0.000876736	0.0043429	1.33658e-06	3.56422e-06	[4, 5, 6]	Group21	2.25632	25	[ANXA2, APP, CALM1, CORO1C, CST3, CSTB, ECM1, EIF6, GAPDH, HSPA1A, HSPB1, NPM1, OTUB1, PABPC1, PFDN4, PPP2R1A, SERPINB6, SERPINE1, SERPINH1, SGTA, SRP9, THBS1, TIMP1, TIMP2, YWHAB]
Hs 578T	secretome	GO_BiologicalProcess 25.05.2022	GO:0031329	regulation of cellular catabolic process	0.00108732	0.00492765	1.33658e-06	3.56422e-06	[4, 5]	Group21	2.40096	20	[ANXA2, APP, CST3, CTTN, DCN, EEF1A1, FUS, GAPDH, HSPA1A, HSPB1, NPM1, PABPC1, PGAM1, PGAM4, QSOX1, RAD23B, SGTA, TIMP1, TIMP2, UBQLN1]
Hs 578T	secretome	GO_BiologicalProcess 25.05.2022	GO:0097435	supramolecular fiber organization	3.57706e-14	1.52383e-11	4.89009e-18	1.17362e-16	[4]	Group22	4.56674	39	[ACTN2, ACTR3, ANXA2, APP, B2M, CAPZA2, CFL2, COL1A1, COL1A2, COL3A1, COL5A1, COL5A2, CORO1C, CSRP1, CST3, CTTN, CXCL12, HSPA1A, KRT31, KRT5, KRT76, KRT9, LOXL2, LUM, MAPRE1, MARCKS, MTPN, NRP1, PDLIM1, PFDN4, PRPH, RHOC, SERPINH1, STMN1, TGFB2, TPM2, TPM4, WDR1, ZYX]
Hs 578T	secretome	GO_BiologicalProcess 25.05.2022	GO:0030155	regulation of cell adhesion	0.000126323	0.00105517	3.66178e-08	2.19707e-07	[3, 4]	Group23	2.6764	22	[ANXA1, ARHGDIA, B2M, COL1A1, CORO1C, CXCL12, DAG1, HLA-A, HSPD1, HSPH1, LAMB1, LAMC1, LGALS1, MMP2, NRP1, PPP2R1A, RSU1, SERPINE1, TGFB2, TGFBI, THBS1, TIMP1]
Hs 578T	secretome	GO_BiologicalProcess 25.05.2022	GO:0051130	positive regulation of cellular component organization	8.04613e-06	0.000190425	4.89009e-18	1.17362e-16	[3, 4, 5]	Group22	2.71248	30	[ACTN2, ACTR3, ANXA1, ANXA2, APP, B2M, CCT6A, CFL2, CLSTN1, CORO1C, CTTN, CXCL12, DAG1, DCN, EIF5A, HNRNPA2B1, HNRNPK, HSP90AA1, HSPA1A, L1CAM, MAPRE1, NRP1, PDCD5, RHOC, SERPINE1, SFPQ, TGFB2, THBS2, TIMP1, WDR1]
Hs 578T	secretome	GO_BiologicalProcess 25.05.2022	GO:0007015	actin filament organization	2.79974e-05	0.000384738	4.89009e-18	1.17362e-16	[4, 5, 7]	Group22	3.5343	17	[ACTN2, ACTR3, CAPZA2, CFL2, CORO1C, CTTN, CXCL12, MARCKS, MTPN, NRP1, PDLIM1, RHOC, STMN1, TPM2, TPM4, WDR1, ZYX]
Hs 578T	secretome	GO_BiologicalProcess 25.05.2022	GO:0030036	actin cytoskeleton organization	5.16751e-05	0.000564451	4.89009e-18	1.17362e-16	[3, 6]	Group22	2.84605	22	[ACTN2, ACTN3, ACTR3, ANXA1, ARHGDIA, CAP1, CAPZA2, CFL2, CORO1C, CSRP1, CTTN, CXCL12, MARCKS, MTPN, NRP1, PDLIM1, RHOC, STMN1, TPM2, TPM4, WDR1, ZYX]
Hs 578T	secretome	GO_BiologicalProcess 25.05.2022	GO:0022411	cellular component disassembly	6.70538e-05	0.000680117	4.89009e-18	1.17362e-16	[4]	Group22	3.29457	17	[ACTN2, CALM1, CAPZA2, CFL2, CST3, CTTN, DNASE2, EIF5A, HSPA2, LAMC1, MMP2, MTPN, PLIN3, STMN1, UBQLN1, UFM1, WDR1]
Hs 578T	secretome	GO_BiologicalProcess 25.05.2022	GO:1902903	regulation of supramolecular fiber organization	0.000182201	0.00131556	4.89009e-18	1.17362e-16	[4, 5]	Group22	3.45679	14	[ACTN2, APP, CAPZA2, CFL2, CTTN, CXCL12, HSPA1A, MAPRE1, MTPN, NRP1, PFDN4, RHOC, STMN1, WDR1]
Hs 578T	secretome	GO_BiologicalProcess 25.05.2022	GO:1902905	positive regulation of supramolecular fiber organization	0.000212868	0.00148659	4.89009e-18	1.17362e-16	[4, 5, 6]	Group22	4.91803	9	[ACTN2, APP, CFL2, CTTN, HSPA1A, MAPRE1, NRP1, RHOC, WDR1]
Hs 578T	secretome	GO_BiologicalProcess 25.05.2022	GO:0030836	positive regulation of actin filament depolymerization	0.000356312	0.00223219	4.89009e-18	1.17362e-16	[5, 6, 7, 8, 9, 10, 11]	Group22	23.0769	3	[ACTN2, CFL2, WDR1]
Hs 578T	secretome	GO_BiologicalProcess 25.05.2022	GO:0030834	regulation of actin filament depolymerization	0.000458409	0.00263895	4.89009e-18	1.17362e-16	[6, 7, 8, 9, 10]	Group22	8.62069	5	[ACTN2, CAPZA2, CFL2, MTPN, WDR1]
Hs 578T	secretome	GO_BiologicalProcess 25.05.2022	GO:0031032	actomyosin structure organization	0.000646002	0.00348351	4.89009e-18	1.17362e-16	[4, 7]	Group22	4.22535	9	[ACTN2, CFL2, CSRP1, NRP1, PDLIM1, RHOC, STMN1, WDR1, ZYX]
Hs 578T	secretome	GO_BiologicalProcess 25.05.2022	GO:0043243	positive regulation of protein-containing complex disassembly	0.000660271	0.00351595	4.89009e-18	1.17362e-16	[4, 5, 6, 7]	Group22	11.1111	4	[ACTN2, CFL2, EIF5A, WDR1]
Hs 578T	secretome	GO_BiologicalProcess 25.05.2022	GO:0010638	positive regulation of organelle organization	0.000920909	0.00440795	4.89009e-18	1.17362e-16	[4, 5, 6]	Group22	2.81955	15	[ACTN2, ANXA1, ANXA2, CCT6A, CFL2, CTTN, DCN, HNRNPA2B1, HSPA1A, MAPRE1, NRP1, PDCD5, RHOC, SFPQ, WDR1]
Hs 578T	secretome	GO_BiologicalProcess 25.05.2022	GO:0032970	regulation of actin filament-based process	0.00110171	0.00488884	4.89009e-18	1.17362e-16	[3, 4]	Group22	3.01624	13	[ACTN2, ARHGDIA, CAPZA2, CFL2, CTTN, CXCL12, MTPN, NRP1, RHOC, SRI, STC1, STMN1, WDR1]
Hs 578T	secretome	GO_BiologicalProcess 25.05.2022	GO:0010941	regulation of cell death	0.000275221	0.00177643	0.000455375	0.000520428	[3, 4]	Group15	2.05245	36	[ACTN2, ACTN3, ANXA1, ANXA5, ARHGDIA, B4GALT1, CASP8, CLSTN1, CTSD, CTTN, CXCL12, EIF5A, FSTL1, HNRNPK, HSP90AA1, HSPA1A, HSPB1, HSPD1, LGALS1, MMP2, NACA, NME1, NPM1, NRP1, PA2G4, PDCD5, PPP2R1A, PTMA, SERPINE1, SFPQ, TGFB2, THBS1, TIMP1, TXN, UBQLN1, UFM1]
Hs 578T	secretome	GO_BiologicalProcess 25.05.2022	GO:0009888	tissue development	1.81916e-06	6.45802e-05	3.66178e-08	2.19707e-07	[3]	Group23	2.25962	47	[ACTN2, ACTN3, ANXA1, B4GALT1, CBR1, CFL2, CLSTN1, COL1A1, COL1A2, COL3A1, COL4A2, COL5A1, COL5A2, COL6A1, CORO1C, CSRP1, CSTB, DAG1, ECM1, EFEMP1, FSTL1, KRT31, KRT5, KRT76, KRT9, LAMB1, LAMC1, LOXL2, MARCKS, MMP2, MTPN, MYL6, NACA, NRP1, PCNA, PLOD1, POSTN, RHOC, SERPINE1, SERPINH1, SETSIP, STC1, TGFB2, TGFBI, TIMP1, VASN, WDR1]
Hs 578T	secretome	GO_BiologicalProcess 25.05.2022	GO:0051130	positive regulation of cellular component organization	8.04613e-06	0.000190425	3.66178e-08	2.19707e-07	[3, 4, 5]	Group23	2.71248	30	[ACTN2, ACTR3, ANXA1, ANXA2, APP, B2M, CCT6A, CFL2, CLSTN1, CORO1C, CTTN, CXCL12, DAG1, DCN, EIF5A, HNRNPA2B1, HNRNPK, HSP90AA1, HSPA1A, L1CAM, MAPRE1, NRP1, PDCD5, RHOC, SERPINE1, SFPQ, TGFB2, THBS2, TIMP1, WDR1]
Hs 578T	secretome	GO_BiologicalProcess 25.05.2022	GO:0001568	blood vessel development	1.06411e-05	0.000215863	3.66178e-08	2.19707e-07	[3, 5, 6, 7]	Group23	3.06667	23	[ANXA1, ANXA2, B4GALT1, CASP8, CLSTN1, COL1A1, COL1A2, COL3A1, COL4A2, COL5A1, DAG1, DCN, ECM1, HSPB1, LOXL2, MMP2, NRP1, SERPINE1, SPARC, TGFB2, TGFBI, THBS1, THBS2]
Hs 578T	secretome	GO_BiologicalProcess 25.05.2022	GO:0009611	response to wounding	1.98028e-05	0.0003515	3.66178e-08	2.19707e-07	[3]	Group23	3.23102	20	[ANXA1, ANXA2, ANXA5, B4GALT1, CLIC1, COL1A1, COL3A1, COL5A1, CSRP1, DAG1, HSPB1, LAMC1, MMP2, NACA, NRP1, RHOC, SERPINE1, TGFB2, THBS1, TIMP1]
Hs 578T	secretome	GO_BiologicalProcess 25.05.2022	GO:0042060	wound healing	2.14567e-05	0.00035156	3.66178e-08	2.19707e-07	[4]	Group23	3.60934	17	[ANXA1, ANXA2, ANXA5, B4GALT1, CLIC1, COL1A1, COL3A1, COL5A1, CSRP1, DAG1, HSPB1, NACA, RHOC, SERPINE1, TGFB2, THBS1, TIMP1]
Hs 578T	secretome	GO_BiologicalProcess 25.05.2022	GO:0016477	cell migration	4.15719e-05	0.000505989	3.66178e-08	2.19707e-07	[3]	Group23	2.26558	36	[ANXA1, APP, B4GALT1, CAP1, CLSTN1, COL1A1, COL3A1, COL5A1, CORO1C, CTTN, CXCL12, DAG1, DCN, ECM1, FSTL1, HSP90AA1, HSPB1, ITGBL1, KRT5, L1CAM, LAMB1, LAMC1, LOXL2, MAPRE1, MMP2, NRP1, PDLIM1, RHOC, S100A11, SERPINE1, SPARC, STC1, TGFB2, THBS1, TIMP1, WDR1]
Hs 578T	secretome	GO_BiologicalProcess 25.05.2022	GO:0048514	blood vessel morphogenesis	5.09714e-05	0.000571416	3.66178e-08	2.19707e-07	[4, 5, 6, 7, 8]	Group23	3.02115	20	[ANXA1, ANXA2, B4GALT1, CASP8, CLSTN1, COL3A1, COL4A2, DAG1, DCN, ECM1, HSPB1, LOXL2, MMP2, NRP1, SERPINE1, SPARC, TGFB2, TGFBI, THBS1, THBS2]
Hs 578T	secretome	GO_BiologicalProcess 25.05.2022	GO:0048646	anatomical structure formation involved in morphogenesis	5.56939e-05	0.00059314	3.66178e-08	2.19707e-07	[2, 3, 4]	Group23	2.41741	30	[ACTN2, ANXA1, ANXA2, B4GALT1, CASP8, CFL2, CLSTN1, COL1A1, COL3A1, COL4A2, COL5A1, COL5A2, COL6A1, CSRP1, DAG1, DCN, ECM1, HSPB1, LAMB1, LOXL2, MMP2, MTPN, NRP1, SERPINE1, SPARC, TGFB2, TGFBI, THBS1, THBS2, WDR1]
Hs 578T	secretome	GO_BiologicalProcess 25.05.2022	GO:2000145	regulation of cell motility	0.00066179	0.00348053	1.97926e-07	7.91703e-07	[3, 4]	Group16	2.30105	24	[ANXA1, APP, CLSTN1, COL1A1, COL3A1, CORO1C, CXCL12, DAG1, DCN, ECM1, HSPB1, KRT5, LAMB1, MMP2, NRP1, PGAM4, RHOC, S100A11, SERPINE1, SPARC, STC1, TGFB2, THBS1, TIMP1]
Hs 578T	secretome	GO_BiologicalProcess 25.05.2022	GO:0072359	circulatory system development	0.000144885	0.00114298	3.66178e-08	2.19707e-07	[4, 5]	Group23	2.36088	28	[ACTN2, ANXA1, ANXA2, B4GALT1, CASP8, CLSTN1, COL1A1, COL1A2, COL3A1, COL4A2, COL5A1, DAG1, DCN, ECM1, HSPB1, LOXL2, MMP2, NACA, NRP1, PCNA, PDLIM1, SERPINE1, SPARC, SRI, TGFB2, TGFBI, THBS1, THBS2]
Hs 578T	secretome	GO_BiologicalProcess 25.05.2022	GO:0016525	negative regulation of angiogenesis	0.000171238	0.00127978	3.66178e-08	2.19707e-07	[4, 5, 6, 7, 8, 9, 10, 11]	Group23	6.66667	7	[COL4A2, DCN, SERPINE1, SPARC, TGFB2, THBS1, THBS2]
Hs 578T	secretome	GO_BiologicalProcess 25.05.2022	GO:0001667	ameboidal-type cell migration	0.000212152	0.00150628	3.66178e-08	2.19707e-07	[4]	Group23	3.24675	15	[ANXA1, CAP1, CLSTN1, CORO1C, DCN, FSTL1, HSPB1, LOXL2, NRP1, PDLIM1, SPARC, STC1, TGFB2, THBS1, TIMP1]
Hs 578T	secretome	GO_BiologicalProcess 25.05.2022	GO:0071560	cellular response to transforming growth factor beta stimulus	0.00024066	0.0016019	3.66178e-08	2.19707e-07	[4, 6]	Group23	4.04412	11	[COL1A1, COL1A2, COL3A1, COL4A2, DKK3, HSPA1A, PDCD5, TGFB2, THBS1, VASN, ZYX]
Hs 578T	secretome	GO_BiologicalProcess 25.05.2022	GO:0010631	epithelial cell migration	0.000283382	0.0018018	3.66178e-08	2.19707e-07	[4, 5]	Group23	3.7037	12	[ANXA1, CLSTN1, CORO1C, DCN, FSTL1, HSPB1, LOXL2, NRP1, SPARC, STC1, TGFB2, THBS1]
Hs 578T	secretome	GO_BiologicalProcess 25.05.2022	GO:0043542	endothelial cell migration	0.00036409	0.00224786	3.66178e-08	2.19707e-07	[5, 6]	Group23	4.16667	10	[ANXA1, CLSTN1, DCN, FSTL1, HSPB1, LOXL2, NRP1, SPARC, STC1, THBS1]
Hs 578T	secretome	GO_BiologicalProcess 25.05.2022	GO:0010632	regulation of epithelial cell migration	0.00038873	0.00233238	3.66178e-08	2.19707e-07	[3, 4, 5, 6]	Group23	4.13223	10	[ANXA1, CLSTN1, CORO1C, DCN, HSPB1, NRP1, SPARC, STC1, TGFB2, THBS1]
Hs 578T	secretome	GO_BiologicalProcess 25.05.2022	GO:2000145	regulation of cell motility	0.00066179	0.00348053	3.66178e-08	2.19707e-07	[3, 4]	Group23	2.30105	24	[ANXA1, APP, CLSTN1, COL1A1, COL3A1, CORO1C, CXCL12, DAG1, DCN, ECM1, HSPB1, KRT5, LAMB1, MMP2, NRP1, PGAM4, RHOC, S100A11, SERPINE1, SPARC, STC1, TGFB2, THBS1, TIMP1]
Hs 578T	secretome	GO_BiologicalProcess 25.05.2022	GO:0001666	response to hypoxia	0.000703621	0.0036554	3.66178e-08	2.19707e-07	[3, 5]	Group23	3.55987	11	[CXCL12, LOXL2, MMP2, PDLIM1, PLOD1, STC1, TGFB2, THBS1, TIMP1, UBQLN1, VASN]
Hs 578T	secretome	GO_BiologicalProcess 25.05.2022	GO:0045765	regulation of angiogenesis	0.000741901	0.00371824	3.66178e-08	2.19707e-07	[4, 5, 6, 7, 8, 9, 10]	Group23	3.53698	11	[CLSTN1, COL4A2, DCN, ECM1, HSPB1, NRP1, SERPINE1, SPARC, TGFB2, THBS1, THBS2]
Hs 578T	secretome	GO_BiologicalProcess 25.05.2022	GO:0071363	cellular response to growth factor stimulus	0.000741377	0.00375984	3.66178e-08	2.19707e-07	[5]	Group23	2.61708	19	[ANXA1, APP, CLSTN1, COL1A1, COL1A2, COL3A1, COL4A2, DCN, DKK3, EEF1A1, FSTL1, HSPA1A, HSPB1, NRP1, PDCD5, TGFB2, THBS1, VASN, ZYX]
Hs 578T	secretome	GO_BiologicalProcess 25.05.2022	GO:2000147	positive regulation of cell motility	0.000909542	0.00440301	3.66178e-08	2.19707e-07	[3, 4, 5]	Group23	2.72109	16	[ANXA1, APP, CLSTN1, COL1A1, CXCL12, HSPB1, LAMB1, MMP2, NRP1, PGAM4, RHOC, S100A11, SERPINE1, SPARC, TGFB2, THBS1]
Hs 578T	secretome	GO_BiologicalProcess 25.05.2022	GO:0010594	regulation of endothelial cell migration	0.000961411	0.00455068	3.66178e-08	2.19707e-07	[4, 5, 6, 7]	Group23	4.41989	8	[ANXA1, CLSTN1, DCN, HSPB1, NRP1, SPARC, STC1, THBS1]
Hs 578T	secretome	GO_BiologicalProcess 25.05.2022	GO:0035924	cellular response to vascular endothelial growth factor stimulus	0.00108748	0.00487651	3.66178e-08	2.19707e-07	[6]	Group23	7.14286	5	[ANXA1, CLSTN1, DCN, HSPB1, NRP1]
Hs 578T	secretome	GO_MolecularFunction_25.05.2022	GO:0003723	RNA binding	9.68049e-12	3.63018e-10	9.68049e-12	7.26037e-11	[4]	Group00	3.04773	53	[ALYREF, ANXA2, CCT6A, CSRP1, CSTB, DCN, EEF1A1, EIF5A, EIF6, FUBP1, FUS, HLA-A, HNRNPA2B1, HNRNPK, HNRNPR, HSP90AA1, HSPA1A, HSPB1, HSPD1, HSPE1, LGALS1, MAP4, MAPRE1, NAP1L1, NME1, NPM1, PA2G4, PABPC1, PABPC5, PDAP1, RBMXL1, RBMXL2, RPL10A, RPL12, RPLP0, RPS12, RPS21, RPS27A, SARNP, SERPINH1, SF3B4, SFPQ, SNRPD1, SRP9, SUB1, TBCA, TPD52L2, TUBA1B, TUBB4B, TXN, UBE2N, XRCC6, ZYX]
Hs 578T	secretome	GO_MolecularFunction_25.05.2022	GO:0015035	protein-disulfide reductase activity	0.00113364	0.00293183	0.00113364	0.00130805	[3, 5]	Group01	9.7561	4	[QSOX1, TXN, TXNDC17, TXNL1]
Hs 578T	secretome	GO_MolecularFunction_25.05.2022	GO:0097718	disordered domain specific binding	5.55959e-05	0.000277979	5.55959e-05	0.000104242	[4]	Group02	13.5135	5	[CALM1, GAPDH, HSP90AA1, HSPA1A, HSPA2]
Hs 578T	secretome	GO_MolecularFunction_25.05.2022	GO:0005539	glycosaminoglycan binding	0.000700055	0.00187515	0.000700055	0.000875068	[3]	Group03	3.87597	10	[APP, COL5A1, DCN, FSTL1, NRP1, PCOLCE, PDCD5, POSTN, THBS1, THBS2]
Hs 578T	secretome	GO_MolecularFunction_25.05.2022	GO:0019899	enzyme binding	5.70008e-05	0.000251474	5.70008e-05	9.50013e-05	[3]	Group04	2.04174	45	[ANXA2, APP, CALM1, CAP1, CASP8, COL1A1, COL1A2, COL3A1, CORO1C, CST3, CSTB, DCTN2, ECM1, EEF1A1, HSP90AA1, HSPA1A, HSPA2, HSPA6, HSPB1, HSPD1, MAPRE1, MARCKS, NPM1, NRP1, OTUB1, PA2G4, PCNA, PGAM1, PGAM4, PRDX6, RANBP1, RHOC, RPS27A, SERPINB6, SERPINE1, SFPQ, SRI, TIMP1, TIMP2, TPI1, TUBA1B, UBE2N, UBQLN1, YWHAB, YWHAH]
Hs 578T	secretome	GO_MolecularFunction_25.05.2022	GO:0031625	ubiquitin protein ligase binding	0.00023677	0.000772075	0.00023677	0.000355155	[5]	Group05	3.82166	12	[CASP8, HSP90AA1, HSPA1A, HSPA6, HSPD1, OTUB1, PA2G4, PRDX6, RPS27A, TPI1, TUBA1B, UBE2N]
Hs 578T	secretome	GO_MolecularFunction_25.05.2022	GO:0032069	regulation of nuclease activity	0.00184078	0.00445351	0.00184078	0.00184078	[4, 5]	Group06	13.6364	3	[HSPA1A, NPM1, PCNA]
Hs 578T	secretome	GO_MolecularFunction_25.05.2022	GO:0003729	mRNA binding	0.00182801	0.00457002	0.00182801	0.00195858	[5]	Group07	3.19767	11	[ALYREF, EIF6, FUBP1, FUS, HNRNPA2B1, HNRNPK, HNRNPR, HSP90AA1, PABPC1, PABPC5, RBMXL2]
Hs 578T	secretome	GO_MolecularFunction_25.05.2022	GO:0003746	translation elongation factor activity	9.27626e-06	9.93885e-05	4.70319e-05	0.000100783	[4, 6]	Group08	19.2308	5	[EEF1A1, EEF1B2, EEF1D, EEF1G, EIF5A]
Hs 578T	secretome	GO_MolecularFunction_25.05.2022	GO:0090079	translation regulator activity, nucleic acid binding	4.70319e-05	0.000251956	4.70319e-05	0.000100783	[2, 4]	Group08	6.95652	8	[EEF1A1, EEF1B2, EEF1D, EEF1G, EIF3J, EIF5A, EIF6, PABPC1]
Hs 578T	secretome	GO_MolecularFunction_25.05.2022	GO:0098641	cadherin binding involved in cell-cell adhesion	4.19238e-05	0.000241868	2.28907e-05	6.86721e-05	[5, 6]	Group09	22.2222	4	[ANXA1, ANXA2, PDLIM1, S100A11]
Hs 578T	secretome	GO_MolecularFunction_25.05.2022	GO:0004859	phospholipase inhibitor activity	0.000576313	0.00160087	2.28907e-05	6.86721e-05	[4, 5, 6]	Group09	20	3	[ANXA1, ANXA2, ANXA5]
Hs 578T	secretome	GO_MolecularFunction_25.05.2022	GO:1900122	positive regulation of receptor binding	0.000158439	0.000540132	0.000370535	0.000505275	[4, 5]	Group10	30	3	[ANXA2, B2M, NRP1]
Hs 578T	secretome	GO_MolecularFunction_25.05.2022	GO:0051099	positive regulation of binding	0.000370535	0.00111161	0.000370535	0.000505275	[2, 3]	Group10	4.61538	9	[ANXA2, APP, B2M, CALM1, MAPRE1, NME1, NRP1, STMN1, TXN]
Hs 578T	secretome	GO_MolecularFunction_25.05.2022	GO:0048407	platelet-derived growth factor binding	7.47448e-08	1.12117e-06	3.12959e-05	7.82397e-05	[4]	Group11	45.4545	5	[COL1A1, COL1A2, COL3A1, COL5A1, COL6A1]
Hs 578T	secretome	GO_MolecularFunction_25.05.2022	GO:0050839	cell adhesion molecule binding	1.13188e-12	8.48911e-11	1.13188e-12	1.69782e-11	[3]	Group12	5.18395	31	[ACTN2, ACTN3, ANXA1, ANXA2, CLIC1, COL3A1, COL5A1, CTTN, CXCL12, EEF1D, EEF1G, EFHD2, GLOD4, HNRNPK, HSPA1A, ITGBL1, LAMB1, LAMC1, MAPRE1, NUDC, PDLIM1, PLIN3, POSTN, PRDX6, RANBP1, S100A11, TGFBI, THBS1, TMPO, VASN, YWHAB]
Hs 578T	secretome	GO_MolecularFunction_25.05.2022	GO:0008092	cytoskeletal protein binding	2.72586e-07	3.40733e-06	2.72586e-07	1.36293e-06	[3]	Group13	3.03605	32	[ACTN2, ACTN3, ACTR3, ANXA2, B4GALT1, CALM1, CAP1, CAPZA2, CFL2, CLSTN1, CORO1C, CSRP1, CTTN, DAG1, DCTN2, GAPDH, HSP90AA1, HSPA2, HSPH1, MAP4, MAPRE1, MARCKS, MYL12B, PDCD5, PDLIM1, S100A6, STMN1, TBCA, TPM2, TPM4, WDR1, YWHAH]
Hs 578T	secretome	GO_MolecularFunction_25.05.2022	GO:0045296	cadherin binding	4.26531e-09	1.06633e-07	1.13188e-12	1.69782e-11	[4]	Group12	5.58659	20	[ANXA1, ANXA2, CLIC1, CTTN, EEF1D, EEF1G, EFHD2, GLOD4, HNRNPK, HSPA1A, MAPRE1, NUDC, PDLIM1, PLIN3, PRDX6, RANBP1, S100A11, TMPO, VASN, YWHAB]
Hs 578T	secretome	GO_MolecularFunction_25.05.2022	GO:0005178	integrin binding	2.08267e-05	0.000173555	1.13188e-12	1.69782e-11	[3, 4]	Group12	5.95238	10	[ACTN2, ACTN3, COL3A1, COL5A1, CXCL12, ITGBL1, LAMB1, LAMC1, TGFBI, THBS1]
Hs 578T	secretome	GO_MolecularFunction_25.05.2022	GO:0019838	growth factor binding	3.12959e-05	0.000234719	3.12959e-05	7.82397e-05	[3]	Group11	6.38298	9	[COL1A1, COL1A2, COL3A1, COL5A1, COL6A1, IGFBP7, NRP1, THBS1, VASN]
Hs 578T	secretome	GO_MolecularFunction_25.05.2022	GO:0051015	actin filament binding	7.10603e-05	0.000296085	2.72586e-07	1.36293e-06	[3, 5]	Group13	4.70085	11	[ACTN2, ACTN3, ACTR3, CAPZA2, CFL2, CORO1C, CTTN, MARCKS, TPM2, TPM4, WDR1]
Hs 578T	secretome	GO_MolecularFunction_25.05.2022	GO:0003779	actin binding	0.000295611	0.000923784	2.72586e-07	1.36293e-06	[4]	Group13	3.18471	15	[ACTN2, ACTN3, ACTR3, CAP1, CAPZA2, CFL2, CORO1C, CTTN, DAG1, MARCKS, PDLIM1, TPM2, TPM4, WDR1, YWHAH]
Hs 578T	secretome	GO_MolecularFunction_25.05.2022	GO:0002020	protease binding	1.88646e-08	3.53712e-07	1.39973e-05	5.24897e-05	[4]	Group14	8.49673	13	[ANXA2, COL1A1, COL1A2, COL3A1, CST3, CSTB, ECM1, RPS27A, SERPINB6, SERPINE1, SRI, TIMP1, TIMP2]
Hs 578T	secretome	GO_MolecularFunction_25.05.2022	GO:0052547	regulation of peptidase activity	1.09883e-05	0.000103016	1.39973e-05	5.24897e-05	[4]	Group14	3.68098	18	[ANXA2, APP, CASP8, CST3, CSTB, CTSD, ECM1, GAPDH, HSPD1, HSPE1, PCOLCE, PDCD5, SERPINB6, SERPINE1, SERPINH1, THBS1, TIMP1, TIMP2]
Hs 578T	secretome	GO_MolecularFunction_25.05.2022	GO:0004857	enzyme inhibitor activity	3.3733e-05	0.000229997	1.39973e-05	5.24897e-05	[2, 3, 4]	Group14	3.68664	16	[ANXA1, ANXA2, ANXA5, APP, CST3, CSTB, GAPDH, HSPB1, NPM1, PPP1R14B, SERPINB6, SERPINE1, SERPINH1, TIMP1, TIMP2, YWHAB]
Hs 578T	secretome	GO_MolecularFunction_25.05.2022	GO:0051336	regulation of hydrolase activity	3.88206e-05	0.000242629	1.39973e-05	5.24897e-05	[3]	Group14	2.57353	28	[ANXA1, ANXA2, APP, CALM1, CASP8, CORO1C, CST3, CSTB, CTSD, ECM1, GAPDH, HSPA1A, HSPD1, HSPE1, NPM1, PCNA, PCOLCE, PDCD5, RHOC, RSU1, SERPINB6, SERPINE1, SERPINH1, STMN1, TGFB2, THBS1, TIMP1, TIMP2]
Hs 578T	secretome	GO_MolecularFunction_25.05.2022	GO:0052548	regulation of endopeptidase activity	5.61965e-05	0.000263421	1.39973e-05	5.24897e-05	[5]	Group14	3.53201	16	[ANXA2, APP, CASP8, CST3, CSTB, CTSD, GAPDH, HSPD1, HSPE1, PDCD5, SERPINB6, SERPINE1, SERPINH1, THBS1, TIMP1, TIMP2]
Hs 578T	secretome	GO_MolecularFunction_25.05.2022	GO:0010466	negative regulation of peptidase activity	7.59018e-05	0.000299612	1.39973e-05	5.24897e-05	[4, 5]	Group14	4.31655	12	[ANXA2, APP, CST3, CSTB, ECM1, GAPDH, SERPINB6, SERPINE1, SERPINH1, THBS1, TIMP1, TIMP2]
Hs 578T	secretome	GO_MolecularFunction_25.05.2022	GO:0061134	peptidase regulator activity	0.000110899	0.00041587	1.39973e-05	5.24897e-05	[3, 4, 5]	Group14	4.47154	11	[ANXA2, APP, CST3, CSTB, GAPDH, PCOLCE, SERPINB6, SERPINE1, SERPINH1, TIMP1, TIMP2]
Hs 578T	secretome	GO_MolecularFunction_25.05.2022	GO:0051346	negative regulation of hydrolase activity	0.000142945	0.000510517	1.39973e-05	5.24897e-05	[3, 4]	Group14	3.58056	14	[ANXA1, ANXA2, APP, CST3, CSTB, ECM1, GAPDH, SERPINB6, SERPINE1, SERPINH1, TGFB2, THBS1, TIMP1, TIMP2]
Hs 578T	secretome	GO_MolecularFunction_25.05.2022	GO:0030234	enzyme regulator activity	0.000436541	0.00125925	1.39973e-05	5.24897e-05	[2, 3]	Group14	2.185	30	[ANXA1, ANXA2, ANXA5, APP, ARHGDIA, CALM1, CST3, CSTB, EEF1B2, EEF1D, GAPDH, HSP90AA1, HSPB1, NPM1, NRP1, NUCB2, PCNA, PCOLCE, PDCD5, PPP1R14B, PPP2R1A, RANBP1, RPLP1, SERPINB6, SERPINE1, SERPINH1, STMN1, TIMP1, TIMP2, YWHAB]
Hs 578T	secretome	GO_MolecularFunction_25.05.2022	GO:0043086	negative regulation of catalytic activity	0.00195727	0.00458734	1.39973e-05	5.24897e-05	[2, 3]	Group14	2.38095	20	[ANXA1, ANXA2, ANXA5, APP, CORO1C, CST3, CSTB, ECM1, GAPDH, HSPB1, NPM1, PPP1R14B, SERPINB6, SERPINE1, SERPINH1, TGFB2, THBS1, TIMP1, TIMP2, YWHAB]
Hs 578T	secretome	KEGG_25.05.2022	KEGG:04512	ECM-receptor interaction	7.21512e-07	5.48349e-05	1.29358e-05	4.52753e-05	[-1]	Group6	11.3636	10	[COL1A1, COL1A2, COL4A2, COL6A1, COL6A2, DAG1, LAMB1, LAMC1, THBS1, THBS2]
Hs 578T	secretome	KEGG_25.05.2022	KEGG:04612	Antigen processing and presentation	2.33452e-06	8.87119e-05	2.33452e-06	1.63417e-05	[-1]	Group2	11.5385	9	[B2M, CTSL, HLA-A, HLA-B, HSP90AA1, HSPA1A, HSPA2, HSPA4, HSPA6]
Hs 578T	secretome	KEGG_25.05.2022	KEGG:05146	Amoebiasis	2.163e-05	0.000328776	1.29358e-05	4.52753e-05	[-1]	Group6	8.82353	9	[COL1A1, COL1A2, COL3A1, COL4A2, HSPB1, LAMB1, LAMC1, SERPINB6, TGFB2]
Hs 578T	secretome	KEGG_25.05.2022	KEGG:05134	Legionellosis	2.15032e-05	0.000408561	2.15032e-05	3.76306e-05	[-1]	Group5	12.2807	7	[CASP8, EEF1A1, EEF1G, HSPA1A, HSPA2, HSPA6, HSPD1]
Hs 578T	secretome	KEGG_25.05.2022	KEGG:04145	Phagosome	1.72431e-05	0.000436825	1.72431e-05	4.02339e-05	[-1]	Group0	7.23684	11	[C1R, CTSL, HLA-A, HLA-B, THBS1, THBS2, TUBA1A, TUBA1B, TUBA3C, TUBA3E, TUBB4B]
Hs 578T	secretome	KEGG_25.05.2022	KEGG:04530	Tight junction	4.63026e-05	0.000502714	4.63026e-05	5.40197e-05	[-1]	Group1	6.50888	11	[ACTR3, CTTN, HSPA4, MYL12B, MYL6, PCNA, PPP2R1A, TUBA1A, TUBA1B, TUBA3C, TUBA3E]
Hs 578T	secretome	KEGG_25.05.2022	KEGG:04915	Estrogen signaling pathway	4.18472e-05	0.000530065	4.18472e-05	5.85861e-05	[-1]	Group3	7.24638	10	[CALM1, CTSD, HSP90AA1, HSPA1A, HSPA2, HSPA6, KRT24, KRT31, KRT9, MMP2]
Hs 578T	secretome	KEGG_25.05.2022	KEGG:05132	Salmonella infection	9.28609e-05	0.000882179	9.28609e-05	9.28609e-05	[-1]	Group4	5.22088	13	[ACTR3, ANXA2, CASP8, DCTN2, GAPDH, HSP90AA1, MYL12B, TUBA1A, TUBA1B, TUBA3C, TUBA3E, TUBB4B, TXN]
Hs 578T	secretome	KEGG_25.05.2022	KEGG:04974	Protein digestion and absorption	0.000155728	0.00131504	1.29358e-05	4.52753e-05	[-1]	Group6	7.76699	8	[COL1A1, COL1A2, COL3A1, COL4A2, COL5A1, COL5A2, COL6A1, COL6A2]
Hs 578T	secretome	KEGG_25.05.2022	KEGG:04510	Focal adhesion	0.000219021	0.00166456	1.29358e-05	4.52753e-05	[-1]	Group6	5.47264	11	[COL1A1, COL1A2, COL4A2, COL6A1, COL6A2, LAMB1, LAMC1, MYL12B, THBS1, THBS2, ZYX]
Hs 578T	secretome	WikiPathways_23.02.2022	WP:2911	miRNA targets in ECM and membrane receptors	3.91061e-09	2.18994e-07	3.62643e-09	2.5385e-08	[-1]	Group6	23.2558	10	[COL1A2, COL3A1, COL4A2, COL5A1, COL5A2, COL6A1, COL6A2, LAMC1, THBS1, THBS2]
Hs 578T	secretome	WikiPathways_23.02.2022	WP:2359	Parkin-ubiquitin proteasomal system pathway	5.04027e-08	1.41128e-06	7.05765e-08	2.47018e-07	[-1]	Group5	15.7143	11	[CASP8, HSPA1A, HSPA2, HSPA4, HSPA6, PSMD9, TUBA1A, TUBA1B, TUBA3C, TUBA3E, TUBB4B]
Hs 578T	secretome	WikiPathways_23.02.2022	WP:5055	Burn wound healing	8.34728e-07	1.55816e-05	8.34728e-07	1.9477e-06	[-1]	Group4	10.8108	12	[COL1A1, COL1A2, CXCL12, DCN, MMP2, S100A11, S100A6, SERPINH1, SPARC, TGFB2, TIMP1, TIMP2]
Hs 578T	secretome	WikiPathways_23.02.2022	WP:107	Translation factors	5.72993e-06	8.0219e-05	5.72993e-06	1.00274e-05	[-1]	Group0	14.8148	8	[EEF1A1, EEF1B2, EEF1D, EEF1G, EIF3J, EIF5A, EIF6, PABPC1]
Hs 578T	secretome	WikiPathways_23.02.2022	WP:3967	miR-509-3p alteration of YAP1/ECM axis	1.90822e-05	0.000213721	1.90822e-05	2.67151e-05	[-1]	Group2	26.3158	5	[COL1A1, COL3A1, COL5A1, SPARC, THBS2]
Hs 578T	secretome	WikiPathways_23.02.2022	WP:453	Inflammatory response pathway	2.65137e-05	0.000247462	3.62643e-09	2.5385e-08	[-1]	Group6	18.1818	6	[COL1A1, COL1A2, COL3A1, LAMB1, LAMC1, THBS1]
Hs 578T	secretome	WikiPathways_23.02.2022	WP:2272	Pathogenic Escherichia coli infection	6.19403e-05	0.000495522	7.05765e-08	2.47018e-07	[-1]	Group5	12.7273	7	[CTTN, TUBA1A, TUBA1B, TUBA3C, TUBA3E, TUBB4B, YWHAQ]
Hs 578T	secretome	WikiPathways_23.02.2022	WP:477	Cytoplasmic ribosomal proteins	0.000263107	0.00184175	0.000263107	0.000306958	[-1]	Group3	8.79121	8	[RPL10A, RPL12, RPLP0, RPLP1, RPLP2, RPS12, RPS21, RPS27A]
Hs 578T	secretome	WikiPathways_23.02.2022	WP:3888	VEGFA-VEGFR2 signaling pathway	0.000654868	0.00407473	0.000654868	0.000654868	[-1]	Group1	4.32802	19	[ANXA1, CLIC1, CSRP1, GAPDH, HSP90AA1, HSPA1A, HSPB1, IGFBP7, MMP2, NAP1L1, PABPC1, PRDX6, PTMA, RHOC, RPL10A, RPLP2, SH3BGRL3, TBCA, TXN]

## Sheet: Table S5
Table S5 Gprofiler and String Enrichment analysis results of identified DEPs after NCT-503 treatment
Cell line	Proteome type	Enrichment analysis platform	category	term id	term name	FDR value	# genes	# background genes	genes
MDA-MB-231	intracellular	StringEnrichmentAnalysis	GO Molecular Function	GO:0005515	Protein binding	0.0024	47	7242	MIF|TIMP1|NAMPT|DDX5|SKP1|TMSB10|HSPB1|APOL2|DYNC1LI2|HAT1|ANLN|LIN7C|MTA2|MYL9|CALM3|RRM1|SOST|P4HB|H1-10|PHACTR1|HSPD1|EIF4EBP1|SDSL|EPHA2|CALD1|ARHGEF2|OAT|BAG3|NIBAN2|ECE1|ALDH4A1|DNAJA1|GARS1|SQSTM1|CDK1|ILK|NUCB1|RANGAP1|SDCBP|NUCB2|KPNA2|PHB2|NPC2|PHB|GALE|ENPP1|PPP3R2
MDA-MB-231	intracellular	StringEnrichmentAnalysis	KEGG Pathways	hsa04218	Cellular senescence	0.0069	6	150	CALM3|CALML3|EIF4EBP1|SQSTM1|CDK1|PPP3R2
MDA-MB-231	intracellular	StringEnrichmentAnalysis	Reactome Pathways	HSA-392499	Metabolism of proteins	0.0229	20	1917	TIMP1|AIMP2|DDX5|SKP1|MRPS36|DYNC1LI2|MRPL44|SPCS2|CALM3|P4HB|EIF4EBP1|ETFB|GARS1|SQSTM1|CDK1|NUCB1|RANGAP1|TMED7|RPL10|USP17L4
MDA-MB-231	intracellular	Gprofiler Enrichment analysis	Gene Ontology Biological Process	GO:1901564	organonitrogen compound metabolic process	0.000389657	40	5986	ILK|HSPB1|ECE1|ETFB|PHB2|USP17L4|NAMPT|PBK|ENPP1|TIMP1|SKP1|PRKCI|MIF|RANGAP1|MRPL44|HAT1|ARHGEF2|DLD|SQSTM1|EPHA2|DDX5|OAT|MRPS36|GMPS|LIN7C|NCAPH|HSPD1|CALD1|ZMAT5|MTA2|BTF3|NIBAN2|DNAJA1|ANLN|AIMP2|GALE|SPCS2|CCDC7|NUCB1|CALM3
MDA-MB-231	intracellular	Gprofiler Enrichment analysis	Gene Ontology Biological Process	GO:0044281	small molecule metabolic process	0.00440449	18	1813	ETFB|NAMPT|ENPP1|MIF|NPC2|DLD|EPHA2|DDX5|RPL10|MRPS36|LIN7C|BAG3|MTA2|BTF3|DNAJA1|AIMP2|GARS1|CALM3
MDA-MB-231	intracellular	Gprofiler Enrichment analysis	Gene Ontology Biological Process	GO:0042981	regulation of apoptotic process	0.00440449	16	1463	HSPB1|PHB2|USP17L4|TIMP1|PRKCI|MIF|ARHGEF2|SQSTM1|OAT|GMPS|NCAPH|CALD1|RRM1|NIBAN2|CCDC7|CALM3
MDA-MB-231	intracellular	Gprofiler Enrichment analysis	Gene Ontology Molecular Function	GO:0005524	ATP binding	0.00480521	16	1500	ILK|PBK|ENPP1|PRKCI|DYNC1LI2|MCM3|MCM5|EPHA2|ATP5MD|MRPS36|NCAPH|BTF3|NIBAN2|AIMP2|SPCS2|CCDC7
MDA-MB-231	secretome	StringEnrichmentAnalysis	GO Biological Process	GO:0006952	Defense response	0.0084	10	1394	MIF|TIMP1|SERPINE1|THBS1|LGALS3BP|IGFBP4|PTX3|CLU|CST3|PRSS2
MDA-MB-231	secretome	StringEnrichmentAnalysis	GO Biological Process	GO:0010755	Regulation of plasminogen activation	0.0084	3	18	SERPINE1|THBS1|CLEC3B
MDA-MB-231	secretome	StringEnrichmentAnalysis	GO Biological Process	GO:0051346	Negative regulation of hydrolase activity	0.0084	6	354	TIMP1|SERPINE1|THBS1|PTX3|CST1|CST3
MDA-MB-231	secretome	StringEnrichmentAnalysis	GO Molecular Function	GO:0002020	Protease binding	0.0015	5	135	MIF|TIMP1|SERPINE1|PSAP|CST3
MDA-MB-231	secretome	StringEnrichmentAnalysis	Reactome Pathways	HSA-114608	Platelet degranulation	1.33e-07	7	126	TIMP1|SERPINE1|THBS1|LGALS3BP|CLEC3B|CLU|PSAP
MDA-MB-231	secretome	StringEnrichmentAnalysis	Reactome Pathways	HSA-8957275	Post-translational protein phosphorylation	5.83e-05	5	107	LGALS1|TIMP1|IGFBP4|IGFBP7|CST3
MDA-MB-231	secretome	StringEnrichmentAnalysis	Reactome Pathways	HSA-6798695	Neutrophil degranulation	0.00014	7	476	MIF|CTSD|PTX3|EEF1A1|PSAP|CST3|PRSS2
MDA-MB-231	secretome	StringEnrichmentAnalysis	Reactome Pathways	HSA-8936459	RUNX1 regulates genes involved in megakaryocyte differentiation and platelet function	0.00021	4	66	H4C6|THBS1|H2AC8|H2BU1
MDA-MB-231	secretome	StringEnrichmentAnalysis	Reactome Pathways	HSA-392499	Metabolism of proteins	0.00024	11	1917	LGALS1|TIMP1|CTSD|H4C6|THBS1|IGFBP4|IGFBP7|H2AC8|EEF1A1|CST3|H2BU1
MDA-MB-231	secretome	StringEnrichmentAnalysis	Reactome Pathways	HSA-1474244	Extracellular matrix organization	0.0014	5	300	TIMP1|SERPINE1|CTSD|THBS1|PRSS2
MDA-MB-231	secretome	StringEnrichmentAnalysis	Reactome Pathways	HSA-1592389	Activation of Matrix Metalloproteinases	0.0182	2	33	TIMP1|PRSS2
MDA-MB-231	secretome	Gprofiler Enrichment analysis	Gene Ontology Biological Process	GO:0030162	regulation of proteolysis	0.000246	7	555	SERPINE1|CLU|THBS1|CST3|CLEC3B|IGFBP7|PRSS2
MDA-MB-231	secretome	Gprofiler Enrichment analysis	Gene Ontology Biological Process	GO:0051346	negative regulation of hydrolase activity	0.000246	5	167	SERPINE1|THBS1|CST3|PTX3|IGFBP7
MDA-MB-231	secretome	Gprofiler Enrichment analysis	Gene Ontology Biological Process	GO:0010755	regulation of plasminogen activation	0.000246	3	18	SERPINE1|THBS1|CLEC3B
MDA-MB-231	secretome	Gprofiler Enrichment analysis	Gene Ontology Biological Process	GO:0051336	regulation of hydrolase activity	0.000271	7	604	SERPINE1|THBS1|CST3|PSAP|PTX3|IGFBP7|PRSS2
MDA-MB-231	secretome	Gprofiler Enrichment analysis	Gene Ontology Biological Process	GO:0010466	negative regulation of peptidase activity	0.000337	4	91	SERPINE1|THBS1|CST3|IGFBP7
MDA-MB-231	secretome	Gprofiler Enrichment analysis	Gene Ontology Biological Process	GO:0006952	defense response	0.000337	10	1791	LGALS3BP|SERPINE1|MIF|CLU|THBS1|CST3|LGALS1|PTX3|IGFBP7|TIMP1
MDA-MB-231	secretome	Gprofiler Enrichment analysis	Gene Ontology Biological Process	GO:0031639	plasminogen activation	0.000376	3	27	SERPINE1|THBS1|CLEC3B
MDA-MB-231	secretome	Gprofiler Enrichment analysis	Gene Ontology Biological Process	GO:0052547	regulation of peptidase activity	0.000421	5	244	SERPINE1|THBS1|CST3|IGFBP7|PRSS2
MDA-MB-231	secretome	Gprofiler Enrichment analysis	Gene Ontology Biological Process	GO:0051248	negative regulation of protein metabolic process	0.000584	7	766	SERPINE1|MIF|CLU|THBS1|CST3|PTX3|IGFBP7
MDA-MB-231	secretome	Gprofiler Enrichment analysis	Gene Ontology Biological Process	GO:0006954	inflammatory response	0.000804	7	829	SERPINE1|MIF|CLU|THBS1|LGALS1|PTX3|IGFBP7
MDA-MB-231	secretome	Gprofiler Enrichment analysis	Gene Ontology Biological Process	GO:0051246	regulation of protein metabolic process	0.000804	10	2102	SERPINE1|MIF|CLU|THBS1|EEF1A1|CST3|CLEC3B|PTX3|IGFBP7|PRSS2
MDA-MB-231	secretome	Gprofiler Enrichment analysis	Gene Ontology Biological Process	GO:0050790	regulation of catalytic activity	0.00091	8	1227	SERPINE1|THBS1|EEF1A1|CST3|PSAP|PTX3|IGFBP7|PRSS2
MDA-MB-231	secretome	Gprofiler Enrichment analysis	Gene Ontology Biological Process	GO:0050896	response to stimulus	0.00141227	18	8976	CUTA|LGALS3BP|IGFBP4|SERPINE1|MIF|CLU|THBS1|EEF1A1|CST3|CLEC3B|CST1|LGALS1|PSAP|PTX3|H2BU1|IGFBP7|TIMP1|PRSS2
MDA-MB-231	secretome	Gprofiler Enrichment analysis	Gene Ontology Biological Process	GO:0065009	regulation of molecular function	0.00149807	9	1799	SERPINE1|CLU|THBS1|EEF1A1|CST3|PSAP|PTX3|IGFBP7|PRSS2
MDA-MB-231	secretome	Gprofiler Enrichment analysis	Gene Ontology Biological Process	GO:0031638	zymogen activation	0.00172433	3	57	SERPINE1|THBS1|CLEC3B
MDA-MB-231	secretome	Gprofiler Enrichment analysis	Gene Ontology Biological Process	GO:0010757	negative regulation of plasminogen activation	0.00186104	2	8	SERPINE1|THBS1
MDA-MB-231	secretome	Gprofiler Enrichment analysis	Gene Ontology Biological Process	GO:0043086	negative regulation of catalytic activity	0.00202236	5	396	SERPINE1|THBS1|CST3|PTX3|IGFBP7
MDA-MB-231	secretome	Gprofiler Enrichment analysis	Gene Ontology Biological Process	GO:0070613	regulation of protein processing	0.00202236	3	65	SERPINE1|THBS1|CLEC3B
MDA-MB-231	secretome	Gprofiler Enrichment analysis	Gene Ontology Biological Process	GO:0045861	negative regulation of proteolysis	0.00202236	4	193	SERPINE1|THBS1|CST3|IGFBP7
MDA-MB-231	secretome	Gprofiler Enrichment analysis	Gene Ontology Biological Process	GO:1903317	regulation of protein maturation	0.00229894	3	69	SERPINE1|THBS1|CLEC3B
MDA-MB-231	secretome	Gprofiler Enrichment analysis	Gene Ontology Biological Process	GO:0052548	regulation of endopeptidase activity	0.00287576	4	219	SERPINE1|THBS1|IGFBP7|PRSS2
MDA-MB-231	secretome	Gprofiler Enrichment analysis	Gene Ontology Biological Process	GO:0010951	negative regulation of endopeptidase activity	0.0028936	3	78	SERPINE1|THBS1|IGFBP7
MDA-MB-231	secretome	Gprofiler Enrichment analysis	Gene Ontology Biological Process	GO:0006508	proteolysis	0.0028936	8	1573	SERPINE1|CLU|THBS1|CST3|CLEC3B|IGFBP7|TIMP1|PRSS2
MDA-MB-231	secretome	Gprofiler Enrichment analysis	Gene Ontology Biological Process	GO:2001234	negative regulation of apoptotic signaling pathway	0.00330852	4	236	SERPINE1|MIF|CLU|THBS1
MDA-MB-231	secretome	Gprofiler Enrichment analysis	Gene Ontology Biological Process	GO:0051918	negative regulation of fibrinolysis	0.00330852	2	13	SERPINE1|THBS1
MDA-MB-231	secretome	Gprofiler Enrichment analysis	Gene Ontology Biological Process	GO:0061684	chaperone-mediated autophagy	0.00411917	2	15	CLU|EEF1A1
MDA-MB-231	secretome	Gprofiler Enrichment analysis	Gene Ontology Biological Process	GO:1903019	negative regulation of glycoprotein metabolic process	0.00411917	2	15	CST3|PTX3
MDA-MB-231	secretome	Gprofiler Enrichment analysis	Gene Ontology Molecular Function	GO:0002020	protease binding	6.29e-07	6	143	SERPINE1|MIF|THBS1|CST3|PSAP|IGFBP7
MDA-MB-231	secretome	Gprofiler Enrichment analysis	Gene Ontology Molecular Function	GO:0004866	endopeptidase inhibitor activity	3.2e-05	5	168	SERPINE1|THBS1|CST3|CST1|IGFBP7
MDA-MB-231	secretome	Gprofiler Enrichment analysis	Gene Ontology Molecular Function	GO:0061135	endopeptidase regulator activity	3.2e-05	5	184	SERPINE1|THBS1|CST3|CST1|IGFBP7
MDA-MB-231	secretome	Gprofiler Enrichment analysis	Gene Ontology Molecular Function	GO:0030414	peptidase inhibitor activity	3.2e-05	5	174	SERPINE1|THBS1|CST3|CST1|IGFBP7
MDA-MB-231	secretome	Gprofiler Enrichment analysis	Gene Ontology Molecular Function	GO:0061134	peptidase regulator activity	7.21e-05	5	227	SERPINE1|THBS1|CST3|CST1|IGFBP7
MDA-MB-231	secretome	Gprofiler Enrichment analysis	Gene Ontology Molecular Function	GO:0004857	enzyme inhibitor activity	0.000828	5	390	SERPINE1|THBS1|CST3|CST1|IGFBP7
MDA-MB-231	secretome	Gprofiler Enrichment analysis	Gene Ontology Molecular Function	GO:0019899	enzyme binding	0.00180462	9	2103	CUTA|SERPINE1|MIF|CLU|THBS1|EEF1A1|CST3|PSAP|IGFBP7
MDA-MB-231	secretome	Gprofiler Enrichment analysis	Gene Ontology Molecular Function	GO:0140678	molecular function inhibitor activity	0.00196181	5	497	SERPINE1|THBS1|CST3|CST1|IGFBP7
MDA-MB-231	secretome	Gprofiler Enrichment analysis	Gene Ontology Molecular Function	GO:0005520	insulin-like growth factor binding	0.00272949	2	19	IGFBP4|H2BU1
MDA-MB-231	secretome	Gprofiler Enrichment analysis	Gene Ontology Molecular Function	GO:0019838	growth factor binding	0.0046655	3	134	IGFBP4|THBS1|H2BU1
MDA-MB-231	secretome	Gprofiler Enrichment analysis	Gene Ontology Molecular Function	GO:0043236	laminin binding	0.00491029	2	28	THBS1|LGALS1
MDA-MB-231	secretome	Gprofiler Enrichment analysis	Reactome pathways	REAC:R-HSA-76005	Response to elevated platelet cytosolic Ca2+	7.95e-08	7	130	LGALS3BP|SERPINE1|CLU|THBS1|CLEC3B|PSAP|IGFBP7
MDA-MB-231	secretome	Gprofiler Enrichment analysis	Reactome pathways	REAC:R-HSA-114608	Platelet degranulation	7.95e-08	7	125	LGALS3BP|SERPINE1|CLU|THBS1|CLEC3B|PSAP|IGFBP7
MDA-MB-231	secretome	Gprofiler Enrichment analysis	Reactome pathways	REAC:R-HSA-76002	Platelet activation, signaling and aggregation	6.22e-06	7	258	LGALS3BP|SERPINE1|CLU|THBS1|CLEC3B|PSAP|IGFBP7
MDA-MB-231	secretome	Gprofiler Enrichment analysis	Reactome pathways	REAC:R-HSA-8957275	Post-translational protein phosphorylation	3.03e-05	5	107	IGFBP4|CST3|LGALS1|H2BU1|IGFBP7
MDA-MB-231	secretome	Gprofiler Enrichment analysis	Reactome pathways	REAC:R-HSA-381426	Regulation of Insulin-like Growth Factor (IGF) transport and uptake by Insulin-like Growth Factor Binding Proteins (IGFBPs)	5.05e-05	5	124	IGFBP4|CST3|LGALS1|H2BU1|IGFBP7
MDA-MB-231	secretome	Gprofiler Enrichment analysis	Reactome pathways	REAC:R-HSA-109582	Hemostasis	0.000161	8	672	LGALS3BP|SERPINE1|MIF|CLU|THBS1|CLEC3B|PSAP|IGFBP7
MDA-MB-231	secretome	Gprofiler Enrichment analysis	Reactome pathways	REAC:R-HSA-6798695	Neutrophil degranulation	0.000165	7	476	MIF|EEF1A1|CST3|PSAP|PTX3|TIMP1|PRSS2
MDA-MB-231	secretome	Gprofiler Enrichment analysis	Reactome pathways	REAC:R-HSA-1474244	Extracellular matrix organization	0.00219174	5	297	SERPINE1|THBS1|IGFBP7|TIMP1|PRSS2
MDA-MB-231	secretome	Gprofiler Enrichment analysis	Reactome pathways	REAC:R-HSA-168249	Innate Immune System	0.00349642	8	1101	MIF|CLU|EEF1A1|CST3|PSAP|PTX3|TIMP1|PRSS2
MDA-MB-231	secretome	Gprofiler Enrichment analysis	Reactome pathways	REAC:R-HSA-597592	Post-translational protein modification	0.00349642	9	1419	H2AC8|IGFBP4|THBS1|EEF1A1|CST3|LGALS1|H2BU1|IGFBP7|CTSD
MDA-MB-468	intracellular	StringEnrichmentAnalysis	KEGG Pathways	hsa00010	Glycolysis / Gluconeogenesis	3.1e-08	8	64	PCK2|LDHAL6A|LDHAL6B|PKLR|ALDH1B1|PGM2|ALDOC|ALDOB
MDA-MB-468	intracellular	StringEnrichmentAnalysis	KEGG Pathways	hsa01230	Biosynthesis of amino acids	1.64e-05	6	73	PKLR|PRPS1|GPT|ALDOC|CBS|ALDOB
MDA-MB-468	intracellular	StringEnrichmentAnalysis	KEGG Pathways	hsa00030	Pentose phosphate pathway	7.21e-05	4	29	PRPS1|PGM2|ALDOC|ALDOB
MDA-MB-468	intracellular	StringEnrichmentAnalysis	Reactome Pathways	HSA-1430728	Metabolism	4.77e-09	39	2092	UQCRC1|SLC25A1|PCK2|CSNK2A1|NDUFS7|NUP85|UROD|CSNK2A2|ESYT1|NDUFB11|LDHAL6A|DDAH1|KPNB1|LDHAL6B|PSMA8|GRHPR|HMGCS1|PKLR|NOSIP|CES1|RRM2|MGST3|PRPS1|ALDH1B1|AKR1C2|IDI1|PGM2|PRKAR1A|DPEP1|GPT|ALDOC|BLVRA|TXNRD1|ETFA|GCDH|MARCKS|CHAC1|NDUFV1|ALDOB
MDA-MB-468	intracellular	StringEnrichmentAnalysis	Reactome Pathways	HSA-69278	Cell Cycle, Mitotic	8.93e-07	16	526	HAUS4|CSNK2A1|NUP85|CSNK2A2|USO1|KPNB1|PSMA8|PPP2R2A|ENSA|RRM2|BUB3|RPA2|TUBAL3|CDK1|DYNC1I2|MCM3
MDA-MB-468	intracellular	Gprofiler Enrichment analysis	Gene Ontology Biological Process	GO:1901564	organonitrogen compound metabolic process	0.00445519	60	5986	PPP2R2A|BZW2|CCT6B|UROD|LONP1|CHAC1|CSNK2A1|CSNK2A2|NOSIP|MIF|PRKAR1A|DPEP1|EIF1B|GCDH|NDUFB11|CTBP1|PHB|NUP85|S100A13|PCK2|DRAP1|CAPRIN1|CDK1|SRPRA|ANP32E|LDHAL6A|LDHAL6B|FAF2|EFCAB3|SUMO4|KRT20|RBM4|XPO5|COLGALT1|BCAS2|HMGCS1|DDX50|DNM3|SFPQ|NDUFS7|MCM3|ALDOC|DNAJC9|ALDOB|KRT82|ATP1A3|ZNF518A|NEDD8|PSMA8|LMAN1|CBS|RANBP1|PKLR|NAA11|RPA2|DIABLO-2|AKR1C2|GZMH|GARS1|CDK2AP1
MDA-MB-468	intracellular	Gprofiler Enrichment analysis	Gene Ontology Biological Process	GO:1901575	organic substance catabolic process	0.00445519	30	2074	UROD|LONP1|CHAC1|CSNK2A1|CSNK2A2|DPEP1|CES1|GCDH|PHB|S100A13|PCK2|DRAP1|LDHAL6B|EFCAB3|SUMO4|XPO5|COLGALT1|HMGCS1|DNM3|MCM3|ALDOC|ALDOB|ATP1A3|ZNF518A|PPM1G|LMAN1|RANBP1|NAA11|GZMH|CDK2AP1
MDA-MB-468	intracellular	Gprofiler Enrichment analysis	Gene Ontology Biological Process	GO:0044281	small molecule metabolic process	0.00445519	28	1813	MIF|DPEP1|CES1|IDI1|GCDH|NDUFB11|MGST3|NUP85|S100A13|MANF|SAE1|DNAL4|LDHAL6A|EFCAB3|SUMO4|XPO5|BCAS2|DNM3|SFPQ|MCM3|ALDOC|KRT82|PPM1G|LMAN1|SF3A3|RANBP1|ADRM1|AKR1C2
MDA-MB-468	intracellular	Gprofiler Enrichment analysis	Gene Ontology Molecular Function	GO:0016491	oxidoreductase activity	0.00067508	18	742	UQCRC1|GCDH|CTBP1|MGST3|NUP85|NDUFV1|MANF|SAE1|DNAL4|EFCAB3|SFPQ|ALDOB|PPM1G|LMAN1|SF3A3|RRM2|TXNRD1|ADRM1
MDA-MB-468	intracellular	Gprofiler Enrichment analysis	Gene Ontology Molecular Function	GO:0003824	catalytic activity	0.00290546	60	5758	CCT6B|ABHD11|UROD|LONP1|CHAC1|CSNK2A1|CSNK2A2|NOSIP|MIF|PRKAR1A|RAB35|UQCRC1|DPEP1|CES1|IDI1|GCDH|CTBP1|MGST3|NUP85|S100A13|NDUFV1|PCK2|MANF|CAPRIN1|H2AC21|ANP32E|SAE1|DNAL4|EFCAB3|SUMO4|XPO5|PGM2|COLGALT1|BCAS2|HMGCS1|HAUS4|DDX50|PTBP2|DNM3|SFPQ|DDAH1|POLR1C|MCM3|ALDOC|ALDOB|KRT82|DYNC1I2|TUBAL3|NEDD8|PPM1G|LMAN1|SF3A3|RANBP1|RRM2|PKLR|TXNRD1|ADRM1|RPA2|DIABLO-2|AKR1C2
MDA-MB-468	intracellular	Gprofiler Enrichment analysis	Gene Ontology Molecular Function	GO:0019899	enzyme binding	0.00354176	30	2103	CTNND1|LONP1|POTEF|MIF|PRKAR1A|UQCRC1|KPNB1|PHB|SRPRA|ANP32E|LDHAL6B|FAF2|GPT|CDC73|RBM4|ENSA|PTBP2|DUSP7|SFPQ|ALDOC|ATP1A3|LMAN1|CBS|CCDC178|NAA11|TXNL1|RPA2|PTPN11|GARS1|MARCKS
MDA-MB-468	intracellular	Gprofiler Enrichment analysis	KEGG	KEGG:00010	Glycolysis / Gluconeogenesis	2.81998e-05	8	67	S100A13|SAE1|DNAL4|XPO5|MCM3|ALDOC|PPM1G|RANBP1
MDA-MB-468	intracellular	Gprofiler Enrichment analysis	KEGG	KEGG:00620	Pyruvate metabolism	0.000373736	6	47	S100A13|MANF|SAE1|DNAL4|PPM1G|RANBP1
MDA-MB-468	intracellular	Gprofiler Enrichment analysis	KEGG	KEGG:01230	Biosynthesis of amino acids	0.00353122	6	74	SUMO4|MCM3|ALDOC|KRT82|LMAN1|RANBP1
MDA-MB-468	intracellular	Gprofiler Enrichment analysis	Reactome pathways	REAC:R-HSA-1430728	Metabolism	0.00380833	39	2074	UROD|CHAC1|CSNK2A1|CSNK2A2|NOSIP|PRKAR1A|UQCRC1|DPEP1|KPNB1|CES1|IDI1|GCDH|NDUFB11|MGST3|S100A16|NUP85|S100A13|MANF|SAE1|DNAL4|LDHAL6A|EFCAB3|SUMO4|XPO5|BCAS2|DNM3|SFPQ|MCM3|ALDOC|ALDOB|KRT82|ZNF518A|PPM1G|LMAN1|SF3A3|RRM2|ADRM1|PTPN11|PITHD1
MDA-MB-468	intracellular	Gprofiler Enrichment analysis	WikiPathways	WP:WP5355	Metabolic Epileptic Disorders	0.000844857	8	91	GCDH|DNAL4|LDHAL6A|SUMO4|MCM3|ALDOC|LMAN1|RANBP1
MDA-MB-468	secreted	StringEnrichmentAnalysis	GO Biological Process	GO:0051246	Regulation of protein metabolic process	0.0079	15	2622	MIF|RARRES1|PI3|SLC9A3R1|PCSK9|KRT17|CLU|HSPA5|EIF4A2|FBLN1|RPLP1|SDC4|IGFBP3|EEF1B2|ANXA8
MDA-MB-468	secreted	StringEnrichmentAnalysis	GO Molecular Function	GO:0005198	Structural molecule activity	0.0041	9	776	MGP|PI3|KRT17|TUBA3E|FBLN1|TUBA1B|RPLP1|CSRP1|H3-2
MDA-MB-468	secreted	StringEnrichmentAnalysis	GO Molecular Function	GO:0001968	Fibronectin binding	0.0335	3	30	FBLN1|SDC4|IGFBP3
MDA-MB-468	secreted	StringEnrichmentAnalysis	KEGG Pathways	hsa04530	Tight junction	0.0252	4	157	SLC9A3R1|TUBA3E|TUBA1B|PCNA
MDA-MB-468	secreted	StringEnrichmentAnalysis	Reactome Pathways	HSA-109582	Hemostasis	0.0418	7	607	MIF|LGALS3BP|CLU|TUBA3E|HSPA5|TUBA1B|SDC4
MDA-MB-468	secreted	Gprofiler Enrichment analysis	Gene Ontology Molecular Function	GO:0005198	structural molecule activity	0.00052187	9	1100	RPLP1|FBLN1|SLC9A3R1|TUBA3E|TUBA1B|CSRP1|LMAN2|HBA2|SETSIP
MDA-MB-468	secreted	Gprofiler Enrichment analysis	Gene Ontology Molecular Function	GO:0001968	fibronectin binding	0.000545136	3	29	SDC4|FBLN1|PI3
Hs 578T	secretome	StringEnrichmentAnalysis	GO Biological Process	GO:0097435	Supramolecular fiber organization	7.65e-11	33	570	COL1A1|KRT9|KRT31|KRT5|PRPH|ACTR3|LUM|APP|RHOC|COL1A2|CFL2|COL3A1|ZYX|KRT76|ANXA2|ACTN2|TGFB2|CSRP1|PDLIM1|COL5A1|COL5A2|MAPRE1|CTTN|LOXL2|CST3|CORO1C|STMN1|WDR1|SERPINH1|MARCKS|TPM4|TPM2|B2M
Hs 578T	secretome	StringEnrichmentAnalysis	GO Biological Process	GO:0030198	Extracellular matrix organization	3.56e-07	20	278	MMP2|LAMB1|COL1A1|LAMC1|LUM|APP|COL1A2|COL3A1|ANXA2|COL4A2|TGFB2|QSOX1|COL5A1|COL5A2|B4GALT1|POSTN|LOXL2|TGFBI|SERPINH1|DAG1
Hs 578T	secretome	StringEnrichmentAnalysis	GO Biological Process	GO:0007155	Cell adhesion	7.77e-07	35	965	LGALS1|LAMB1|PCDHB10|HSPB1|LAMC1|THBS1|LGALS3BP|NRP1|S100A11|APP|IGFBP7|COL6A2|COL3A1|ZYX|ANXA2|COL6A1|ACTN2|THBS2|TGFB2|CSRP1|L1CAM|PDLIM1|COL5A1|CLIC1|ITGBL1|CTTN|ANXA1|CLSTN1|B4GALT1|POSTN|LOXL2|CXCL12|TGFBI|ACTN3|DAG1
Hs 578T	secretome	StringEnrichmentAnalysis	GO Biological Process	GO:0071840	Cellular component organization or biogenesis	1e-06	102	5639	MMP2|SGTA|PLIN3|DNASE2|LAMB1|COL1A1|CTSD|PCDHB10|TFG|KRT9|KRT31|KRT5|FUS|PRPH|LAMC1|THBS1|EIF3J|ACTR3|SUB1|NRP1|LUM|SF3B4|APP|RHOC|CALM3|NPM1|COL1A2|CFL2|SNRPD1|PA2G4|HSPA4|MAT2A|COL3A1|TBCA|B4GAT1|TUBA3E|NUDC|ZYX|PPP2R1A|TUBA3D|KRT76|HSP90AA1|TUBA1B|HSPD1|TUBB4B|CTSL|RPS21|ANXA2|HNRNPA2B1|SFPQ|XRCC6|MAP4|COL4A2|CAPZA2|ACTN2|TGFB2|CSRP1|QSOX1|S100A6|L1CAM|PDLIM1|COL5A1|CAP1|DNAJC9|RPL10A|EIF6|COL…
Hs 578T	secretome	StringEnrichmentAnalysis	GO Biological Process	GO:0007010	Cytoskeleton organization	1.68e-06	39	1229	KRT9|KRT31|KRT5|PRPH|ACTR3|NRP1|RHOC|NPM1|CFL2|TUBA3E|NUDC|ZYX|PPP2R1A|TUBA3D|KRT76|TUBA1B|TUBB4B|MAP4|CAPZA2|ACTN2|CSRP1|PDLIM1|CAP1|MAPRE1|CTTN|ANXA1|GAPDH|CORO1C|RANBP1|DCTN2|STMN1|NSFL1C|ACTN3|WDR1|TUBA1A|DAG1|MARCKS|TPM4|TPM2
Hs 578T	secretome	StringEnrichmentAnalysis	GO Biological Process	GO:0010033	Response to organic substance	3.37e-05	59	2692	TIMP1|MMP2|SGTA|SERPINE1|COL1A1|HSPE1|MT2A|HSPB1|YWHAH|TXNDC17|THBS1|TIMP2|ACTR3|NRP1|APP|STC1|CALM3|IGFBP7|ANXA5|NPM1|COL1A2|COL6A2|HSPA4|MAT2A|COL3A1|HSPA6|NUDC|ZYX|PPP2R1A|HSP90AA1|EIF5A|TUBA1B|EEF1A1|HSPD1|CTSL|RAD23B|CASP8|COL4A2|COL6A1|ACTN2|TGFB2|AKR1A1|RPL10A|EIF6|COL5A2|HSPA1B|UBQLN1|ANXA1|PCNA|POSTN|HSPA2|CXCL12|GAPDH|SERPINH1|DAG1|RPLP0|PDCD5|HSPH1|B2M
Hs 578T	secretome	StringEnrichmentAnalysis	GO Biological Process	GO:0042026	Protein refolding	4.19e-05	7	25	HSPB1|HSPA6|HSP90AA1|HSPD1|HSPA1B|HSPA2|B2M
Hs 578T	secretome	StringEnrichmentAnalysis	GO Biological Process	GO:0048522	Positive regulation of cellular process	0.00016	94	5584	DCN|LGALS1|TIMP1|MMP2|SGTA|LAMB1|SERPINE1|COL1A1|RPS12|SPARC|CTSD|TFG|HSPB1|YWHAH|FUS|LAMC1|THBS1|ACTR3|SUB1|NRP1|SRI|LUM|SF3B4|S100A11|CCT6A|APP|RHOC|CBR1|CALM3|NPM1|CFL2|PA2G4|COL3A1|PABPC1|UBE2N|PPP2R1A|HSP90AA1|EIF5A|NME1|HSPD1|PRDX6|PTMA|RFPL4AL1|ANXA2|RPLP1|HNRNPA2B1|SFPQ|CASP8|XRCC6|ACTN2|THBS2|TGFB2|S100A6|ECM1|L1CAM|PDLIM1|FNDC5|EIF6|TXN|MAPRE1|HSPA1B|CLIC1|HNRNPK|UBQLN1|CTTN|ANXA1|CLSTN…
Hs 578T	secretome	StringEnrichmentAnalysis	GO Biological Process	GO:0065009	Regulation of molecular function	0.00021	62	3085	TIMP1|PCOLCE|SERPINE1|HSPE1|CTSD|HSPB1|YWHAH|THBS1|TIMP2|NRP1|SRI|APP|RHOC|CALM3|CSTB|ANXA5|NPM1|PPP1R14B|UBE2N|PPP2R1A|HSP90AA1|NME1|EEF1A1|HSPD1|ANXA2|RPLP1|HNRNPA2B1|CASP8|XRCC6|ACTN2|TGFB2|ECM1|CAP1|YWHAB|DNAJC9|TXN|MAPRE1|HSPA1B|HNRNPK|UBQLN1|ANXA1|RSU1|PCNA|EEF1B2|MTPN|HSPA2|GAPDH|CST3|CORO1C|RANBP1|EEF1D|STMN1|DKK3|SERPINH1|NUCB2|DAG1|ARHGDIA|PDCD5|SERPINB6|TPM2|B2M|FHL1
Hs 578T	secretome	StringEnrichmentAnalysis	GO Biological Process	GO:0009628	Response to abiotic stimulus	0.00025	32	1107	PLOD1|TIMP1|MMP2|COL1A1|HSPB1|KRT5|THBS1|APP|STC1|IGFBP7|NPM1|COL3A1|VASN|HSPA6|HSP90AA1|HSPD1|CASP8|XRCC6|TGFB2|PDLIM1|TXN|HSPA1B|UBQLN1|ANXA1|PCNA|LOXL2|MTPN|HSPA2|CXCL12|EEF1D|DAG1|SERPINB6
[truncated: 451 more rows]

## Sheet: Table S6
Table S6 EnrichR Enrichment analysis results of identified DEPs after NCT-503 treatment
[truncated: 603 more rows]

[truncated: 7 more sheets: Table S7, Table S8, Table S9, Table S10, Table S11, Table S12, Table S13]
